# Supplementary material for: Widespread Separation of the Polypyrimidine Tract From 3′ AG by G Tracts in Association With Alternative Exons in Metazoa and Plants
Source: PubMed Central journal article supplement (PMC6339879; doi:10.3389/fgene.2018.00741), 2019-01-14
Supplement: Data_Sheet_3.pdf [file Data_Sheet_3.pdf]

```

        for exon in constitutive_exon:
            constitue_exon_list.append(exon)
    RNA_count = 0
    exon_list=[]
    constitutive_exon=[]
    break
if gb_feature.type=='mRNA' or gb_feature.type=='misc_RNA':
    RNA_count +=1
    exon_list=[]
    num_sub_feature=len(gb_feature.sub_features)
    strand= gb_feature.location.strand
    if num_sub_feature:
        pos_list=[]
        for sub_feature in gb_feature.sub_features:
            sub_start=sub_feature.location.nofuzzy_start
            sub_end=sub_feature.location.nofuzzy_end
            pos_list.append(sub_start)
            pos_list.append(sub_end)
        for i in range(num_sub_feature):
            start=pos_list.pop(0)
            end=pos_list.pop(0)

exon_list.append([start,end,strand,chromosome,gene_name])
                if RNA_count == 1: # get first list only to check exon
of first in other list or not

constitutive_exon.append([start,end,strand,chromosome,gene_name])
    else:

exon_list.append([gb_feature.location.start.position,gb_feature.location.end.pos
ition,strand,chromosome,gene_name])
                if RNA_count == 1:

constitutive_exon.append([gb_feature.location.start.position,gb_feature.location
.end.position,strand,chromosome,gene_name])
    #print exon_list
    if RNA_count != 0:
        remove_exon_list=[]
        for exon in constitutive_exon:
            if exon not in exon_list:
                remove_exon_list.append(exon)
        for remove_exon in remove_exon_list:
            constitutive_exon.remove(remove_exon)

def out_report(constitutive_exon_list,dir_name,ensembl_division):
    if len(constitutive_exon_list) == 0:

        print "No Constitutive Exon Found in " + dir_name

    else:
        completeName = os.path.join(save_path, ensembl_division + '_' + dir_name
+'.txt')
        out_file=open(completeName,'w')

```

```

    out_file.write('Exon_Start' + '\t' + 'Exon_End' + '\t'+ 'Strand' + '\t' +
'Chromosome' + '\t' + 'GeneID' + '\n')
    for item in constituve_exon_list:
        out_file.write(str(item[0]) + '\t' + str(item[1]) + '\t' + str(item[2])
+ '\t' + str(item[3]) + '\t' + str(item[4]) + '\n')
    out_file.close()

def main():

base_path='/media/xielab101/Seagate_Backup_Plus02/1000_Species/Data_Genome_R36_9
0/' # parent Folder contains files of spieces
list_dir = os.listdir(base_path)
sorted_list_dir = sorted(list_dir)
print sorted_list_dir
for ensembl_division in sorted_list_dir:
    base_path1=base_path+ensembl_division+'/'
    print base_path1
    list_dir1 = os.listdir(base_path1)
    list_dir_sort = sorted(list_dir1)
    for dir_name in list_dir_sort:
        print 'Species: ' + dir_name
        full_directory = os.path.join(base_path1,dir_name)
        matched_files
=find_matched_files(full_directory, '.dat', file_format='', folder_ignored=['files'
])
        constituve_exon_list=[] # Store seq of each spieces
        for f in matched_files:
            print f
            extract_constitutive_exon(f,constituve_exon_list)
        print len(constituve_exon_list)
        out_report(constituve_exon_list,dir_name,ensembl_division)

    print ('Done')

if __name__=='__main__':
    main()

```
