# Supplementary material for: Widespread Separation of the Polypyrimidine Tract From 3′ AG by G Tracts in Association With Alternative Exons in Metazoa and Plants
Source: Front Genet. 2019 Jan 14;9:741. doi: 10.3389/fgene.2018.00741 (PMC6339879; doi:10.3389/fgene.2018.00741)
Supplement: TABLE S2 — Nucleotide matrices of REPAG 3′ SS of 1031 species/lineages. [file Table_2.xlsx]

## Sheet: S_Table 2
																												Supplementary table 2: Nucleotide matrices of REPAG 3' SS of 1031 species/lineages.
Ensembl Division Release	Species	N%	-50	-49	-48	-47	-46	-45	-44	-43	-42	-41	-40	-39	-38	-37	-36	-35	-34	-33	-32	-31	-30	-29	-28	-27	-26	-25	-24	-23	-22	-21	-20	-19	-18	-17	-16	-15	-14	-13	-12	-11	-10	-9	-8	-7	-6	-5	-4
Fungi_Release38	puccinia_sorghi	A	0.2877	0.2811	0.292	0.2925	0.2942	0.2791	0.2783	0.278	0.2851	0.2657	0.29	0.2865	0.2999	0.2948	0.2897	0.3088	0.2971	0.2962	0.2974	0.3031	0.2951	0.2951	0.2777	0.2917	0.2868	0.2931	0.2911	0.2725	0.2646	0.2737	0.2671	0.2831	0.2703	0.2394	0.2531	0.2429	0.2286	0.2089	0.2015	0.1747	0.2471	0.2272	0.2243	0.2551	0.2717	0.2794	0.3639
Fungi_Release38	puccinia_sorghi	C	0.1924	0.1772	0.1949	0.1895	0.1875	0.1915	0.1835	0.1941	0.1767	0.1749	0.1729	0.1641	0.1812	0.1695	0.1941	0.1772	0.1821	0.1698	0.1824	0.1781	0.1812	0.1861	0.1721	0.1832	0.1678	0.1801	0.1781	0.1632	0.1758	0.1841	0.1704	0.1775	0.1886	0.1889	0.1804	0.1655	0.1567	0.1487	0.1455	0.131	0.0771	0.0719	0.0776	0.0785	0.0765	0.1033	0.1179
Fungi_Release38	puccinia_sorghi	G	0.2266	0.2269	0.2226	0.228	0.2292	0.2277	0.248	0.2229	0.2346	0.254	0.2491	0.2414	0.216	0.2272	0.2158	0.2243	0.2203	0.23	0.23	0.2183	0.2289	0.2163	0.234	0.224	0.2323	0.2055	0.2186	0.2326	0.2406	0.2163	0.2163	0.2226	0.2112	0.2103	0.2123	0.2703	0.3148	0.3584	0.3707	0.4298	0.4926	0.5174	0.5314	0.4786	0.4889	0.4172	0.3564
Fungi_Release38	puccinia_sorghi	T	0.2934	0.3148	0.2905	0.29	0.2891	0.3017	0.2902	0.3051	0.3037	0.3054	0.288	0.3079	0.3028	0.3085	0.3005	0.2897	0.3005	0.3039	0.2902	0.3005	0.2948	0.3025	0.3162	0.3011	0.3131	0.3213	0.3122	0.3316	0.3191	0.3259	0.3462	0.3168	0.3299	0.3613	0.3542	0.3213	0.2999	0.284	0.2822	0.2646	0.1832	0.1835	0.1667	0.1878	0.163	0.2001	0.1618
Fungi_Release38	fibulorhizoctonia_sp_cbs_109695	A	0.2045	0.2013	0.1948	0.1952	0.2162	0.1989	0.207	0.1839	0.2029	0.1916	0.2061	0.2094	0.2045	0.1968	0.2235	0.2247	0.2065	0.2251	0.2264	0.2187	0.2365	0.2114	0.234	0.2179	0.2425	0.2506	0.2405	0.2348	0.2255	0.2264	0.2559	0.2648	0.2215	0.2191	0.2365	0.251	0.2563	0.2607	0.2344	0.1463	0.1835	0.1528	0.1702	0.1694	0.1831	0.1908	0.3266
Fungi_Release38	fibulorhizoctonia_sp_cbs_109695	C	0.2316	0.2316	0.2595	0.2587	0.2599	0.2567	0.2745	0.2797	0.2502	0.2676	0.2599	0.2555	0.2482	0.2656	0.2555	0.2518	0.251	0.2344	0.2255	0.2417	0.2259	0.251	0.2441	0.232	0.2284	0.215	0.2247	0.253	0.2389	0.2255	0.2013	0.1989	0.2401	0.2215	0.2223	0.2191	0.2041	0.1977	0.2025	0.1928	0.0986	0.1164	0.0946	0.1475	0.0954	0.1443	0.0905
Fungi_Release38	fibulorhizoctonia_sp_cbs_109695	G	0.2862	0.2825	0.2486	0.2255	0.2498	0.2373	0.2029	0.2304	0.2369	0.2276	0.2247	0.2183	0.2171	0.2276	0.228	0.2138	0.253	0.2393	0.2506	0.2639	0.2425	0.2603	0.2627	0.2749	0.2619	0.2692	0.2429	0.2462	0.251	0.2619	0.2454	0.2591	0.2336	0.2381	0.2385	0.2365	0.2652	0.2749	0.3129	0.3747	0.5687	0.5812	0.5974	0.5061	0.595	0.4652	0.5061
Fungi_Release38	fibulorhizoctonia_sp_cbs_109695	T	0.2777	0.2846	0.2971	0.3205	0.2741	0.3072	0.3157	0.306	0.31	0.3133	0.3092	0.3169	0.3302	0.31	0.293	0.3096	0.2894	0.3011	0.2975	0.2757	0.2951	0.2773	0.2591	0.2753	0.2672	0.2652	0.2918	0.266	0.2846	0.2862	0.2975	0.2773	0.3048	0.3213	0.3027	0.2935	0.2745	0.2668	0.2502	0.2862	0.1492	0.1496	0.1378	0.177	0.1265	0.1997	0.0768
Fungi_Release38	rhizoctonia_solani	A	0.2256	0.2235	0.2184	0.2334	0.208	0.2137	0.2085	0.2064	0.2085	0.2152	0.209	0.2158	0.209	0.2158	0.2059	0.2194	0.2318	0.2261	0.2495	0.2267	0.25	0.2464	0.2588	0.2417	0.2759	0.2453	0.2759	0.2671	0.2505	0.2453	0.2588	0.2645	0.2692	0.2635	0.2822	0.2775	0.2873	0.3143	0.2702	0.1603	0.1914	0.1374	0.1297	0.1779	0.2075	0.2433	0.4279
Fungi_Release38	rhizoctonia_solani	C	0.1442	0.153	0.1577	0.1706	0.1826	0.181	0.2054	0.2163	0.2261	0.221	0.2189	0.2163	0.2318	0.209	0.2329	0.2173	0.2132	0.2168	0.1872	0.1976	0.1955	0.1966	0.181	0.1774	0.1888	0.1888	0.181	0.1992	0.194	0.1919	0.194	0.1789	0.194	0.2033	0.2194	0.1992	0.1779	0.1675	0.1992	0.1961	0.1011	0.0861	0.0726	0.0794	0.0742	0.1136	0.0918
Fungi_Release38	rhizoctonia_solani	G	0.3392	0.3143	0.2899	0.279	0.2713	0.2386	0.2272	0.2152	0.209	0.1981	0.1981	0.1929	0.207	0.2106	0.2033	0.2246	0.2173	0.2023	0.2267	0.2272	0.2246	0.2246	0.2329	0.2453	0.2272	0.2599	0.251	0.2396	0.2433	0.2272	0.2324	0.2277	0.1904	0.194	0.1732	0.1862	0.2168	0.2272	0.2137	0.3107	0.527	0.6328	0.6515	0.5643	0.57	0.4352	0.3683
Fungi_Release38	rhizoctonia_solani	T	0.291	0.3091	0.334	0.3169	0.3382	0.3667	0.3589	0.362	0.3563	0.3657	0.374	0.375	0.3522	0.3646	0.3579	0.3387	0.3377	0.3548	0.3366	0.3485	0.3299	0.3325	0.3273	0.3356	0.3081	0.306	0.292	0.2941	0.3122	0.3356	0.3148	0.3288	0.3465	0.3392	0.3252	0.3371	0.3179	0.291	0.3169	0.333	0.1805	0.1437	0.1463	0.1784	0.1483	0.208	0.112
Fungi_Release38	calocera_cornea_hhb12733	A	0.1444	0.1325	0.1477	0.1585	0.1629	0.1227	0.1433	0.1352	0.1493	0.1542	0.1607	0.1574	0.164	0.1607	0.1574	0.1737	0.1694	0.1954	0.1982	0.1971	0.1813	0.2068	0.1906	0.2275	0.2096	0.2074	0.2248	0.2242	0.221	0.184	0.2172	0.2166	0.2009	0.1786	0.1553	0.1857	0.2351	0.2622	0.2861	0.1764	0.1786	0.1477	0.1585	0.1471	0.1672	0.171	0.3225
Fungi_Release38	calocera_cornea_hhb12733	C	0.2497	0.266	0.2476	0.279	0.2796	0.2997	0.297	0.3051	0.3203	0.3046	0.2894	0.3241	0.3122	0.2736	0.2932	0.2807	0.2839	0.2476	0.26	0.2584	0.2524	0.2438	0.2448	0.2161	0.2193	0.2128	0.2074	0.2313	0.2465	0.2389	0.2427	0.2226	0.2117	0.2296	0.2649	0.2644	0.1748	0.1868	0.2291	0.247	0.1379	0.1107	0.1048	0.1243	0.0917	0.1444	0.0706
Fungi_Release38	calocera_cornea_hhb12733	G	0.3333	0.3089	0.3192	0.2823	0.2655	0.2698	0.2481	0.2465	0.24	0.2367	0.24	0.2313	0.2242	0.2552	0.2628	0.2682	0.2704	0.285	0.2818	0.3035	0.316	0.3089	0.3089	0.3295	0.3485	0.3529	0.3594	0.3176	0.3035	0.317	0.2959	0.3122	0.3225	0.2986	0.2959	0.2611	0.2818	0.3263	0.2834	0.3561	0.5489	0.608	0.5983	0.5869	0.6531	0.5309	0.5603
Fungi_Release38	calocera_cornea_hhb12733	T	0.2725	0.2926	0.2856	0.2801	0.2921	0.3078	0.3116	0.3132	0.2904	0.3046	0.31	0.2872	0.2997	0.3105	0.2866	0.2774	0.2763	0.272	0.26	0.241	0.2503	0.2405	0.2557	0.2269	0.2226	0.2269	0.2085	0.2269	0.2291	0.26	0.2443	0.2486	0.2649	0.2932	0.2839	0.2888	0.3084	0.2248	0.2014	0.2204	0.1346	0.1336	0.1384	0.1417	0.0879	0.1536	0.0467
Fungi_Release38	exidia_glandulosa_hhb12029	A	0.1862	0.176	0.156	0.1595	0.1743	0.1509	0.1657	0.1572	0.1771	0.1583	0.1765	0.1902	0.1651	0.168	0.1874	0.1874	0.164	0.2022	0.1879	0.1731	0.1874	0.1879	0.1851	0.1788	0.2141	0.1987	0.2113	0.1987	0.2033	0.2056	0.1982	0.205	0.2141	0.2067	0.1942	0.2107	0.2363	0.2631	0.2711	0.1708	0.1817	0.1401	0.1498	0.156	0.1856	0.1606	0.3411
Fungi_Release38	exidia_glandulosa_hhb12029	C	0.2358	0.2546	0.2625	0.2694	0.258	0.2887	0.2899	0.2904	0.3024	0.291	0.3172	0.2853	0.2825	0.3178	0.3138	0.2853	0.2688	0.2733	0.2705	0.2608	0.2751	0.2842	0.2403	0.2585	0.2415	0.2426	0.2603	0.2568	0.254	0.2477	0.25	0.2813	0.2694	0.2506	0.2779	0.2779	0.2198	0.2511	0.2278	0.2654	0.1412	0.1435	0.1031	0.1686	0.0974	0.1669	0.0695
Fungi_Release38	exidia_glandulosa_hhb12029	G	0.2973	0.3069	0.2938	0.2944	0.2671	0.2625	0.2244	0.2574	0.2397	0.2158	0.2244	0.2312	0.2249	0.2147	0.2016	0.2278	0.2722	0.242	0.2415	0.2625	0.2637	0.2397	0.2796	0.291	0.2733	0.2808	0.2688	0.2671	0.2534	0.2739	0.2699	0.2363	0.25	0.2557	0.2472	0.2437	0.2739	0.2916	0.279	0.3417	0.5376	0.5928	0.6378	0.5387	0.5974	0.4157	0.5444
Fungi_Release38	exidia_glandulosa_hhb12029	T	0.2808	0.2625	0.2876	0.2768	0.3007	0.2978	0.32	0.295	0.2808	0.3349	0.2819	0.2933	0.3274	0.2995	0.2973	0.2995	0.295	0.2825	0.3001	0.3035	0.2739	0.2882	0.295	0.2716	0.2711	0.2779	0.2597	0.2773	0.2893	0.2728	0.2819	0.2773	0.2665	0.287	0.2808	0.2677	0.2699	0.1942	0.2221	0.2221	0.1395	0.1236	0.1093	0.1367	0.1196	0.2568	0.045
Fungi_Release38	calocera_viscosa_tufc12733	A	0.1501	0.1454	0.1437	0.1489	0.1518	0.1454	0.1524	0.1146	0.1379	0.139	0.1466	0.1454	0.1373	0.1547	0.1664	0.1664	0.1635	0.1704	0.1856	0.1757	0.1873	0.1972	0.2135	0.21	0.2257	0.2164	0.2152	0.2129	0.2269	0.2187	0.2286	0.2129	0.2211	0.196	0.1739	0.1838	0.2187	0.2926	0.2949	0.2123	0.196	0.1693	0.1675	0.1687	0.1722	0.203	0.356
Fungi_Release38	calocera_viscosa_tufc12733	C	0.2577	0.2472	0.2513	0.2635	0.281	0.288	0.324	0.3217	0.3287	0.3455	0.3357	0.3188	0.3351	0.3188	0.299	0.3048	0.2885	0.2763	0.267	0.2554	0.2461	0.2315	0.2286	0.2292	0.2083	0.2123	0.2216	0.2356	0.2432	0.2443	0.2182	0.2199	0.2059	0.2257	0.2728	0.2624	0.1722	0.1768	0.1902	0.2536	0.1425	0.1297	0.0908	0.1105	0.0739	0.1233	0.0657
Fungi_Release38	calocera_viscosa_tufc12733	G	0.3281	0.3368	0.2955	0.2787	0.2664	0.2618	0.2147	0.2234	0.2083	0.2024	0.1838	0.2158	0.2083	0.2013	0.2414	0.2257	0.2554	0.2571	0.267	0.2914	0.3042	0.288	0.2984	0.3153	0.3182	0.3269	0.3455	0.331	0.3077	0.3176	0.3072	0.3136	0.3124	0.3077	0.2821	0.2548	0.2973	0.3147	0.2949	0.3112	0.5038	0.5765	0.6091	0.5765	0.669	0.516	0.5259
Fungi_Release38	calocera_viscosa_tufc12733	T	0.2641	0.2705	0.3095	0.3089	0.3008	0.3048	0.3089	0.3403	0.3252	0.313	0.3339	0.32	0.3194	0.3252	0.2932	0.3031	0.2926	0.2961	0.2804	0.2775	0.2624	0.2833	0.2595	0.2455	0.2478	0.2443	0.2176	0.2205	0.2222	0.2193	0.2461	0.2536	0.2606	0.2705	0.2711	0.299	0.3118	0.2158	0.2199	0.2228	0.1576	0.1245	0.1326	0.1443	0.0849	0.1576	0.0524
Fungi_Release38	cryptococcus_amylolentus_cbs_6273	A	0.1896	0.2065	0.1803	0.1844	0.168	0.1657	0.1774	0.168	0.1628	0.1709	0.1663	0.1715	0.1931	0.189	0.1908	0.1849	0.2182	0.22	0.2135	0.213	0.217	0.2322	0.248	0.2544	0.2561	0.283	0.2684	0.2742	0.2929	0.2981	0.3034	0.2835	0.2736	0.2229	0.1587	0.1709	0.2211	0.3046	0.353	0.2515	0.2287	0.1925	0.1511	0.1657	0.154	0.1867	0.367
Fungi_Release38	cryptococcus_amylolentus_cbs_6273	C	0.2235	0.2135	0.2124	0.2217	0.2316	0.2427	0.2468	0.2532	0.28	0.2754	0.2678	0.2795	0.2666	0.2713	0.2386	0.2579	0.2375	0.2147	0.2042	0.1954	0.21	0.2001	0.1984	0.1645	0.1499	0.1348	0.154	0.1459	0.1762	0.1791	0.1919	0.1593	0.1832	0.2118	0.262	0.2835	0.175	0.1406	0.1464	0.1768	0.1009	0.0694	0.056	0.0618	0.0659	0.0963	0.0572
Fungi_Release38	cryptococcus_amylolentus_cbs_6273	G	0.2911	0.2765	0.2929	0.2917	0.2719	0.2515	0.2375	0.2526	0.2124	0.2042	0.2089	0.2065	0.2013	0.2112	0.2398	0.2462	0.2357	0.2427	0.2602	0.2888	0.283	0.3034	0.3139	0.3267	0.3635	0.3658	0.3769	0.3786	0.3396	0.3285	0.3016	0.3489	0.3541	0.3372	0.3419	0.2678	0.2783	0.3221	0.2643	0.3191	0.4837	0.6109	0.6756	0.6429	0.6639	0.479	0.5023
Fungi_Release38	cryptococcus_amylolentus_cbs_6273	T	0.2958	0.3034	0.3145	0.3022	0.3285	0.3401	0.3384	0.3261	0.3448	0.3495	0.3571	0.3425	0.339	0.3285	0.3308	0.311	0.3086	0.3226	0.3221	0.3028	0.29	0.2643	0.2398	0.2544	0.2305	0.2165	0.2007	0.2013	0.1914	0.1943	0.203	0.2083	0.189	0.2281	0.2375	0.2777	0.3256	0.2328	0.2363	0.2526	0.1867	0.1272	0.1173	0.1295	0.1161	0.238	0.0735
Fungi_Release38	rhizoctonia_solani_ag_1_ia	A	0.2287	0.2393	0.2512	0.2518	0.2459	0.2476	0.2488	0.2453	0.247	0.2476	0.2417	0.2595	0.2672	0.25	0.2553	0.2607	0.2624	0.2607	0.2441	0.2453	0.25	0.2464	0.2672	0.2654	0.2536	0.2642	0.2654	0.237	0.266	0.2441	0.2512	0.2482	0.2767	0.2571	0.2814	0.2684	0.263	0.2346	0.2127	0.1611	0.2174	0.2204	0.1961	0.215	0.2476	0.221	0.343
Fungi_Release38	rhizoctonia_solani_ag_1_ia	C	0.2002	0.2038	0.2186	0.215	0.1967	0.2305	0.2233	0.2269	0.2239	0.2079	0.2269	0.2204	0.202	0.2174	0.2168	0.2103	0.215	0.1914	0.1991	0.2068	0.2133	0.1896	0.1961	0.1943	0.1848	0.2056	0.1902	0.1914	0.1878	0.2091	0.1914	0.2073	0.1765	0.2091	0.2186	0.1682	0.1742	0.1724	0.1759	0.1842	0.1043	0.0895	0.0983	0.0989	0.1072	0.1173	0.1238
Fungi_Release38	rhizoctonia_solani_ag_1_ia	G	0.2571	0.2488	0.2233	0.2227	0.2435	0.2239	0.2139	0.2387	0.2145	0.2376	0.2245	0.2032	0.205	0.2145	0.2198	0.1973	0.2044	0.2245	0.2287	0.2287	0.2198	0.2405	0.2198	0.2364	0.2352	0.2257	0.2376	0.2293	0.2198	0.2293	0.2133	0.2358	0.2251	0.2269	0.1973	0.2512	0.285	0.2974	0.3193	0.3744	0.5083	0.5409	0.5385	0.4994	0.4775	0.4704	0.3667
Fungi_Release38	rhizoctonia_solani_ag_1_ia	T	0.314	0.3081	0.3069	0.3104	0.314	0.298	0.314	0.2891	0.3146	0.3069	0.3069	0.3169	0.3258	0.3181	0.3081	0.3318	0.3181	0.3235	0.3282	0.3193	0.3169	0.3235	0.3169	0.3039	0.3264	0.3045	0.3069	0.3424	0.3264	0.3175	0.3442	0.3086	0.3217	0.3069	0.3027	0.3122	0.2778	0.2956	0.2921	0.2802	0.17	0.1493	0.1671	0.1866	0.1677	0.1914	0.1665
Fungi_Release38	cryptococcus_amylolentus_cbs_6039	A	0.1817	0.2092	0.1823	0.1775	0.1668	0.1715	0.1715	0.1686	0.1566	0.1626	0.1656	0.1715	0.1907	0.1895	0.1883	0.1913	0.2271	0.2158	0.2212	0.2241	0.2188	0.2367	0.2475	0.2558	0.257	0.2881	0.2773	0.2773	0.2839	0.2965	0.303	0.2827	0.269	0.2134	0.1608	0.1751	0.2194	0.3138	0.358	0.2493	0.2289	0.1907	0.1452	0.165	0.1506	0.1889	0.3772
Fungi_Release38	cryptococcus_amylolentus_cbs_6039	C	0.2271	0.211	0.2056	0.2176	0.2253	0.2439	0.2469	0.2534	0.2833	0.2803	0.2672	0.2839	0.2684	0.2642	0.2355	0.2504	0.2295	0.2176	0.2074	0.1907	0.2056	0.1895	0.1937	0.1584	0.147	0.1321	0.1464	0.1369	0.1704	0.1769	0.1955	0.1584	0.1865	0.2056	0.2654	0.2917	0.1698	0.1387	0.1447	0.1793	0.1004	0.0663	0.0526	0.0556	0.0646	0.0909	0.052
Fungi_Release38	cryptococcus_amylolentus_cbs_6039	G	0.2911	0.2726	0.2953	0.2863	0.2648	0.2493	0.2331	0.2469	0.202	0.2086	0.2044	0.199	0.1943	0.2074	0.2355	0.2475	0.2385	0.2445	0.2534	0.2773	0.2875	0.3072	0.3144	0.324	0.3634	0.3706	0.3766	0.3855	0.3556	0.3311	0.3036	0.3479	0.3485	0.3425	0.3377	0.2534	0.2785	0.3228	0.254	0.3138	0.4919	0.6127	0.6898	0.6503	0.6701	0.4662	0.5021
Fungi_Release38	cryptococcus_amylolentus_cbs_6039	T	0.3001	0.3072	0.3168	0.3186	0.3431	0.3353	0.3485	0.3311	0.358	0.3485	0.3628	0.3455	0.3467	0.3389	0.3407	0.3108	0.3048	0.3222	0.318	0.3078	0.2881	0.2666	0.2445	0.2618	0.2325	0.2092	0.1996	0.2002	0.1901	0.1955	0.1978	0.211	0.1961	0.2385	0.2361	0.2797	0.3323	0.2247	0.2433	0.2576	0.1787	0.1303	0.1124	0.1291	0.1148	0.254	0.0687
Fungi_Release38	rhizoctonia_solani_ag_8_wac10335	A	0.228	0.2214	0.2232	0.21	0.2064	0.2088	0.2196	0.2418	0.2346	0.2034	0.2166	0.1992	0.2028	0.234	0.2148	0.2034	0.2148	0.2178	0.2358	0.2519	0.2352	0.2322	0.2328	0.2507	0.246	0.2496	0.2699	0.2579	0.2603	0.2597	0.2663	0.2525	0.2867	0.2765	0.2573	0.2645	0.2735	0.3221	0.2879	0.1656	0.1842	0.1476	0.1398	0.1722	0.1926	0.2172	0.3905
Fungi_Release38	rhizoctonia_solani_ag_8_wac10335	C	0.1602	0.1836	0.1806	0.1836	0.1998	0.207	0.2226	0.2238	0.2424	0.2304	0.2472	0.2687	0.2454	0.243	0.2388	0.234	0.2304	0.2274	0.228	0.2064	0.2232	0.213	0.2046	0.2052	0.2028	0.2052	0.1932	0.2094	0.2214	0.2286	0.207	0.2136	0.1788	0.2148	0.2118	0.2286	0.192	0.1842	0.1956	0.198	0.1104	0.0852	0.0744	0.1008	0.0984	0.1212	0.099
Fungi_Release38	rhizoctonia_solani_ag_8_wac10335	G	0.3239	0.2927	0.2861	0.2969	0.2711	0.2466	0.2268	0.222	0.2142	0.2196	0.1914	0.1908	0.1938	0.1974	0.2136	0.2172	0.2058	0.2172	0.2334	0.2262	0.2472	0.2454	0.2567	0.2663	0.2501	0.2484	0.246	0.2513	0.2442	0.237	0.2226	0.2184	0.228	0.1902	0.2106	0.21	0.2244	0.234	0.2346	0.3149	0.5249	0.6221	0.6305	0.5429	0.5735	0.4469	0.4187
Fungi_Release38	rhizoctonia_solani_ag_8_wac10335	T	0.2879	0.3023	0.3101	0.3095	0.3227	0.3377	0.3311	0.3125	0.3089	0.3467	0.3449	0.3413	0.3581	0.3257	0.3329	0.3455	0.3491	0.3377	0.3029	0.3155	0.2945	0.3095	0.3059	0.2777	0.3011	0.2969	0.2909	0.2813	0.2741	0.2747	0.3041	0.3155	0.3065	0.3185	0.3203	0.2969	0.3101	0.2597	0.2819	0.3215	0.1806	0.1452	0.1554	0.1842	0.1356	0.2148	0.0918
Fungi_Release38	tsuchiyaea_wingfieldii_cbs_7118	A	0.1917	0.1899	0.1795	0.1935	0.174	0.1716	0.1679	0.1789	0.1746	0.1612	0.149	0.177	0.1819	0.1947	0.1954	0.1911	0.2106	0.2088	0.2186	0.2228	0.2161	0.2265	0.2546	0.2534	0.2424	0.268	0.2729	0.279	0.2918	0.2839	0.3065	0.2949	0.2686	0.2259	0.1697	0.1783	0.2051	0.3107	0.3486	0.243	0.2302	0.196	0.1465	0.1581	0.1667	0.1862	0.3803
Fungi_Release38	tsuchiyaea_wingfieldii_cbs_7118	C	0.2277	0.2277	0.2186	0.2241	0.2161	0.2204	0.2521	0.2741	0.2692	0.2778	0.2753	0.2735	0.2698	0.2613	0.254	0.2613	0.2338	0.2228	0.2179	0.1978	0.21	0.2027	0.1703	0.1661	0.1606	0.1313	0.1471	0.1447	0.1716	0.1661	0.1832	0.1654	0.1819	0.2027	0.2589	0.2637	0.1825	0.1422	0.1422	0.1734	0.1062	0.0714	0.0537	0.0513	0.0623	0.1001	0.0568
Fungi_Release38	tsuchiyaea_wingfieldii_cbs_7118	G	0.29	0.2955	0.2808	0.2735	0.2912	0.2582	0.2509	0.232	0.2308	0.2106	0.2271	0.1935	0.1972	0.2173	0.2241	0.2405	0.2436	0.2411	0.257	0.2808	0.2833	0.3107	0.3346	0.3034	0.3614	0.3803	0.3791	0.3962	0.3376	0.3547	0.3211	0.3352	0.3474	0.3565	0.3376	0.268	0.2991	0.3223	0.2662	0.3156	0.4774	0.5946	0.6813	0.6667	0.6593	0.4664	0.4969
Fungi_Release38	tsuchiyaea_wingfieldii_cbs_7118	T	0.2906	0.2869	0.3211	0.3089	0.3187	0.3498	0.3291	0.315	0.3254	0.3504	0.3486	0.3559	0.351	0.3266	0.3266	0.3071	0.312	0.3272	0.3065	0.2985	0.2906	0.2601	0.2405	0.2772	0.2357	0.2204	0.2009	0.1801	0.199	0.1954	0.1893	0.2045	0.2021	0.2149	0.2338	0.29	0.3132	0.2247	0.243	0.268	0.1862	0.138	0.1184	0.1239	0.1117	0.2473	0.0659
Fungi_Release38	rhizoctonia_solani_ag_3_rhs1ap	A	0.2381	0.2523	0.2313	0.2214	0.2028	0.2115	0.2226	0.2245	0.1985	0.2109	0.2078	0.2226	0.2282	0.1973	0.2171	0.2307	0.2344	0.2121	0.2455	0.2412	0.2381	0.2233	0.24	0.2665	0.261	0.248	0.2449	0.274	0.2801	0.274	0.2604	0.2536	0.2783	0.29	0.2641	0.2715	0.2882	0.3278	0.2894	0.1651	0.1923	0.1441	0.1416	0.1787	0.1886	0.2214	0.4007
Fungi_Release38	rhizoctonia_solani_ag_3_rhs1ap	C	0.1521	0.1552	0.1608	0.1608	0.1824	0.1763	0.2066	0.1985	0.2152	0.227	0.2387	0.235	0.2127	0.2319	0.2307	0.2022	0.1936	0.2121	0.1967	0.1954	0.1899	0.1763	0.1861	0.1719	0.1787	0.1917	0.1806	0.1942	0.1954	0.2022	0.1886	0.1948	0.1831	0.2028	0.2276	0.2263	0.1738	0.1824	0.1991	0.2103	0.0971	0.0748	0.073	0.0971	0.0686	0.1144	0.0891
Fungi_Release38	rhizoctonia_solani_ag_3_rhs1ap	G	0.3309	0.3105	0.303	0.2944	0.2795	0.2548	0.2158	0.2344	0.2047	0.2127	0.1948	0.1775	0.2022	0.2158	0.2047	0.2208	0.1985	0.2257	0.2134	0.2387	0.2239	0.2604	0.2492	0.2505	0.2492	0.2653	0.2536	0.2362	0.235	0.2257	0.2313	0.2344	0.2121	0.2022	0.1837	0.1775	0.2146	0.222	0.214	0.3129	0.522	0.6197	0.6333	0.5362	0.6036	0.431	0.4174
Fungi_Release38	rhizoctonia_solani_ag_3_rhs1ap	T	0.2789	0.282	0.3049	0.3234	0.3352	0.3575	0.355	0.3426	0.3816	0.3494	0.3587	0.3649	0.3568	0.355	0.3476	0.3463	0.3735	0.35	0.3445	0.3247	0.3482	0.3401	0.3247	0.3111	0.3111	0.295	0.321	0.2956	0.2894	0.2981	0.3197	0.3173	0.3265	0.3049	0.3247	0.3247	0.3234	0.2678	0.2975	0.3117	0.1886	0.1614	0.1521	0.188	0.1391	0.2331	0.0928
Fungi_Release38	jaapia_argillacea_mucl_33604	A	0.1871	0.1721	0.169	0.1446	0.1564	0.1758	0.1615	0.1533	0.1771	0.1702	0.1589	0.1959	0.194	0.1846	0.194	0.1984	0.1921	0.1984	0.2128	0.2153	0.1984	0.2134	0.2334	0.2334	0.2028	0.2165	0.2528	0.2084	0.2334	0.2247	0.2171	0.2171	0.2203	0.2397	0.2322	0.2065	0.2078	0.2134	0.169	0.1151	0.1427	0.1339	0.1414	0.1627	0.1859	0.2028	0.3573
Fungi_Release38	jaapia_argillacea_mucl_33604	C	0.2328	0.2509	0.2447	0.271	0.2685	0.2822	0.2747	0.2572	0.2641	0.2603	0.2635	0.2378	0.2553	0.2209	0.2384	0.2303	0.2359	0.2109	0.2272	0.2272	0.2028	0.2065	0.2065	0.2171	0.2115	0.2228	0.1796	0.2059	0.2046	0.2046	0.2171	0.1959	0.1984	0.194	0.179	0.1746	0.1564	0.1464	0.1658	0.1464	0.0776	0.067	0.0632	0.0763	0.0757	0.0951	0.0607
Fungi_Release38	jaapia_argillacea_mucl_33604	G	0.2459	0.224	0.2228	0.1959	0.189	0.1852	0.1884	0.2009	0.194	0.189	0.2297	0.1996	0.2059	0.229	0.2397	0.2247	0.2322	0.2578	0.2315	0.2409	0.2829	0.2697	0.2622	0.2591	0.2672	0.2622	0.2453	0.2534	0.2491	0.2297	0.2472	0.2403	0.2347	0.2222	0.2222	0.2353	0.2835	0.281	0.3091	0.3692	0.5901	0.6521	0.6295	0.5438	0.5782	0.4399	0.4856
Fungi_Release38	jaapia_argillacea_mucl_33604	T	0.3342	0.3529	0.3636	0.3886	0.3861	0.3567	0.3755	0.3886	0.3648	0.3805	0.3479	0.3667	0.3448	0.3655	0.3279	0.3467	0.3398	0.3329	0.3285	0.3166	0.316	0.3104	0.2979	0.2904	0.3185	0.2985	0.3223	0.3323	0.3129	0.3411	0.3185	0.3467	0.3467	0.3442	0.3667	0.3836	0.3523	0.3592	0.3561	0.3692	0.1896	0.1471	0.1658	0.2171	0.1602	0.2622	0.0964
Fungi_Release38	gloeophyllum_trabeum_atcc_11539	A	0.1965	0.1846	0.1751	0.1714	0.1789	0.1777	0.1808	0.1632	0.1858	0.1839	0.1751	0.182	0.1707	0.1846	0.1908	0.1946	0.1745	0.1946	0.1971	0.2009	0.2285	0.2015	0.2078	0.1977	0.2203	0.2128	0.2172	0.2247	0.1996	0.2185	0.2272	0.2266	0.236	0.2166	0.2304	0.2329	0.2404	0.2492	0.2379	0.1481	0.1601	0.1475	0.172	0.1802	0.2034	0.167	0.2957
Fungi_Release38	gloeophyllum_trabeum_atcc_11539	C	0.2335	0.2235	0.2247	0.2505	0.2662	0.2706	0.2593	0.2655	0.2775	0.2737	0.2668	0.2643	0.2693	0.2831	0.2398	0.2448	0.2473	0.2599	0.2517	0.2467	0.2316	0.236	0.2411	0.226	0.2341	0.2316	0.231	0.226	0.2373	0.2178	0.2254	0.2065	0.2279	0.2348	0.2411	0.2436	0.1946	0.2078	0.2015	0.2216	0.1287	0.1161	0.0954	0.1306	0.0847	0.1343	0.0734
Fungi_Release38	gloeophyllum_trabeum_atcc_11539	G	0.2919	0.3139	0.3007	0.258	0.2549	0.2561	0.2436	0.2542	0.2429	0.2247	0.236	0.2442	0.2574	0.2492	0.258	0.2624	0.2781	0.2574	0.275	0.2693	0.2925	0.2869	0.2976	0.3277	0.2988	0.2969	0.3139	0.2913	0.2894	0.2844	0.2793	0.2599	0.2605	0.2392	0.2298	0.2392	0.2768	0.3051	0.3132	0.3779	0.565	0.5989	0.6183	0.4947	0.5825	0.4821	0.5474
Fungi_Release38	gloeophyllum_trabeum_atcc_11539	T	0.2781	0.2781	0.2994	0.3202	0.3001	0.2957	0.3164	0.317	0.2938	0.3176	0.322	0.3095	0.3026	0.2831	0.3114	0.2982	0.3001	0.2881	0.2762	0.2831	0.2473	0.2756	0.2536	0.2486	0.2467	0.2586	0.2379	0.258	0.2737	0.2793	0.268	0.307	0.2756	0.3095	0.2988	0.2844	0.2881	0.2379	0.2473	0.2524	0.1463	0.1375	0.1142	0.1946	0.1293	0.2166	0.0835
Fungi_Release38	fomitopsis_pinicola_fp_58527_ss1	A	0.1728	0.1703	0.1703	0.1811	0.1874	0.1518	0.19	0.183	0.1703	0.1741	0.1741	0.1792	0.197	0.1804	0.2046	0.1842	0.1989	0.197	0.1925	0.1919	0.2033	0.2313	0.2116	0.2128	0.2008	0.1995	0.2141	0.216	0.2071	0.2198	0.2421	0.2236	0.2274	0.2427	0.2249	0.2268	0.249	0.2294	0.2103	0.1442	0.1849	0.1328	0.1468	0.1455	0.1614	0.1506	0.3056
Fungi_Release38	fomitopsis_pinicola_fp_58527_ss1	C	0.249	0.2605	0.2465	0.303	0.2891	0.2929	0.2821	0.2757	0.2973	0.317	0.2853	0.2897	0.2522	0.2656	0.2776	0.2903	0.2726	0.244	0.2681	0.2554	0.2662	0.2465	0.2598	0.2446	0.2554	0.2452	0.2586	0.2573	0.2668	0.2363	0.2421	0.2497	0.237	0.2764	0.2598	0.256	0.2255	0.2452	0.2395	0.2668	0.1398	0.141	0.1188	0.1595	0.0978	0.1696	0.0851
Fungi_Release38	fomitopsis_pinicola_fp_58527_ss1	G	0.2986	0.2827	0.3043	0.2344	0.2719	0.2649	0.2408	0.2484	0.2376	0.209	0.2363	0.2421	0.2414	0.2776	0.2567	0.2548	0.2732	0.2872	0.2637	0.2986	0.277	0.2694	0.2891	0.2814	0.3043	0.291	0.2834	0.27	0.2643	0.263	0.2637	0.2516	0.2618	0.2255	0.237	0.2605	0.2694	0.2942	0.3132	0.3577	0.5299	0.6017	0.6207	0.5496	0.6347	0.4905	0.5457
Fungi_Release38	fomitopsis_pinicola_fp_58527_ss1	T	0.2795	0.2865	0.2789	0.2814	0.2516	0.2903	0.2872	0.2929	0.2948	0.2999	0.3043	0.2891	0.3094	0.2764	0.2611	0.2706	0.2554	0.2719	0.2757	0.2541	0.2535	0.2529	0.2395	0.2611	0.2395	0.2643	0.244	0.2567	0.2618	0.2808	0.2522	0.2751	0.2738	0.2554	0.2783	0.2567	0.256	0.2313	0.237	0.2313	0.1455	0.1245	0.1137	0.1455	0.1061	0.1893	0.0635
Fungi_Release38	tuber_melanosporum	A	0.2177	0.1841	0.1938	0.2125	0.219	0.2106	0.1925	0.2028	0.1867	0.2242	0.2216	0.2067	0.2171	0.2351	0.2112	0.2487	0.2087	0.2306	0.2313	0.2358	0.2358	0.2487	0.2332	0.2358	0.2358	0.2616	0.2455	0.2623	0.2603	0.2584	0.2603	0.2636	0.2571	0.2539	0.2461	0.2397	0.2306	0.2468	0.2474	0.1841	0.1815	0.1841	0.1809	0.2203	0.2106	0.2778	0.4315
Fungi_Release38	tuber_melanosporum	C	0.2468	0.2603	0.2494	0.2513	0.2429	0.2526	0.2642	0.241	0.2752	0.2455	0.2481	0.2106	0.2203	0.2003	0.2061	0.2145	0.2048	0.1796	0.1673	0.1873	0.1796	0.1712	0.1673	0.1705	0.1977	0.1712	0.1705	0.1783	0.1964	0.1686	0.1751	0.1615	0.1693	0.1718	0.1557	0.1718	0.1408	0.1531	0.1415	0.1298	0.0846	0.0743	0.0672	0.0594	0.0646	0.0749	0.0601
Fungi_Release38	tuber_melanosporum	G	0.2177	0.2422	0.2274	0.23	0.228	0.2287	0.2565	0.2481	0.2571	0.2293	0.2506	0.2926	0.2726	0.2739	0.3017	0.2661	0.3094	0.3068	0.2881	0.3062	0.3198	0.3017	0.3301	0.3075	0.2997	0.2978	0.323	0.2997	0.2733	0.2933	0.2836	0.2946	0.2991	0.2771	0.2901	0.2978	0.3469	0.3456	0.376	0.4399	0.5814	0.6324	0.613	0.5543	0.5866	0.449	0.4089
Fungi_Release38	tuber_melanosporum	T	0.3178	0.3133	0.3295	0.3062	0.3101	0.3081	0.2868	0.3081	0.281	0.301	0.2797	0.2901	0.2901	0.2907	0.281	0.2707	0.2771	0.2829	0.3133	0.2707	0.2649	0.2784	0.2694	0.2862	0.2668	0.2694	0.261	0.2597	0.27	0.2797	0.281	0.2804	0.2745	0.2972	0.3081	0.2907	0.2817	0.2545	0.2351	0.2461	0.1525	0.1092	0.1389	0.166	0.1382	0.1983	0.0995
Fungi_Release38	rhizoctonia_solani_123e	A	0.2394	0.2414	0.2381	0.2245	0.2056	0.2095	0.2036	0.2258	0.1887	0.216	0.2173	0.2173	0.2251	0.2075	0.2134	0.2342	0.2297	0.216	0.2635	0.2381	0.2388	0.2186	0.2349	0.2811	0.2602	0.2505	0.2498	0.2772	0.2642	0.2668	0.2563	0.2381	0.2772	0.2824	0.2759	0.2772	0.2863	0.3286	0.2889	0.164	0.1887	0.1366	0.1444	0.1718	0.1945	0.2199	0.419
Fungi_Release38	rhizoctonia_solani_123e	C	0.1399	0.1646	0.1666	0.1724	0.1841	0.1744	0.2075	0.2023	0.2199	0.2303	0.2212	0.2271	0.2225	0.2251	0.2297	0.2075	0.2069	0.2128	0.1932	0.1965	0.1984	0.1887	0.19	0.1783	0.1802	0.1828	0.1887	0.1913	0.1945	0.2088	0.1874	0.201	0.1848	0.2023	0.216	0.2277	0.1802	0.1841	0.1913	0.1893	0.0995	0.08	0.0703	0.093	0.0638	0.1126	0.0794
Fungi_Release38	rhizoctonia_solani_123e	G	0.3442	0.2947	0.3103	0.27	0.2889	0.2485	0.2284	0.2225	0.2128	0.2082	0.1841	0.1841	0.1861	0.2251	0.2095	0.2017	0.201	0.229	0.2075	0.2303	0.2277	0.2518	0.2576	0.2362	0.2401	0.2635	0.2524	0.2375	0.2303	0.2381	0.2329	0.2368	0.2167	0.2004	0.1887	0.1705	0.2075	0.229	0.2251	0.3299	0.5192	0.6181	0.6239	0.5433	0.5986	0.4418	0.4047
Fungi_Release38	rhizoctonia_solani_123e	T	0.2765	0.2993	0.285	0.3331	0.3214	0.3676	0.3604	0.3494	0.3787	0.3455	0.3774	0.3715	0.3663	0.3422	0.3474	0.3565	0.3624	0.3422	0.3357	0.3351	0.3351	0.3409	0.3175	0.3045	0.3195	0.3032	0.309	0.2941	0.311	0.2863	0.3234	0.324	0.3214	0.3149	0.3195	0.3247	0.326	0.2583	0.2947	0.3169	0.1926	0.1653	0.1614	0.1919	0.1431	0.2258	0.0969
Fungi_Release38	aspergillus_niger	A	0.2542	0.2458	0.2514	0.2642	0.2684	0.2627	0.2578	0.2351	0.279	0.2465	0.2578	0.25	0.2727	0.2635	0.2727	0.2627	0.2627	0.2436	0.272	0.2833	0.2712	0.2684	0.2642	0.2904	0.2698	0.2677	0.2741	0.2854	0.279	0.2507	0.262	0.2585	0.2521	0.25	0.2224	0.2181	0.2217	0.233	0.2337	0.1629	0.228	0.2217	0.1863	0.2068	0.2358	0.2443	0.3477
Fungi_Release38	aspergillus_niger	C	0.2295	0.2295	0.2004	0.2224	0.2047	0.2061	0.2195	0.2337	0.2266	0.2436	0.2153	0.2195	0.2068	0.199	0.2118	0.1919	0.2047	0.2146	0.1969	0.2203	0.2132	0.2082	0.1877	0.2082	0.2033	0.2203	0.182	0.1785	0.2125	0.2082	0.1763	0.1926	0.1686	0.182	0.1955	0.1962	0.1806	0.1501	0.1657	0.1601	0.1041	0.0871	0.0793	0.0864	0.0751	0.0914	0.0892
Fungi_Release38	aspergillus_niger	G	0.2521	0.2691	0.2635	0.262	0.255	0.2712	0.2401	0.2627	0.2401	0.2542	0.2535	0.2606	0.2436	0.2564	0.2465	0.2635	0.2677	0.2762	0.2535	0.2592	0.2649	0.2684	0.2989	0.2535	0.2705	0.2521	0.2897	0.2677	0.2564	0.267	0.2769	0.2493	0.3067	0.2819	0.2649	0.2826	0.3286	0.3527	0.3364	0.4207	0.5205	0.5467	0.5899	0.5538	0.5411	0.4433	0.4568
Fungi_Release38	aspergillus_niger	T	0.2642	0.2557	0.2847	0.2514	0.272	0.2599	0.2826	0.2684	0.2542	0.2557	0.2734	0.2698	0.2769	0.2812	0.2691	0.2819	0.2649	0.2656	0.2776	0.2373	0.2507	0.255	0.2493	0.2479	0.2564	0.2599	0.2542	0.2684	0.2521	0.2741	0.2847	0.2996	0.2727	0.2861	0.3173	0.3031	0.2691	0.2642	0.2642	0.2564	0.1473	0.1445	0.1445	0.153	0.148	0.221	0.1062
Fungi_Release38	dacryopinax_primogenitus	A	0.1833	0.1688	0.1789	0.1674	0.1768	0.1717	0.1595	0.1717	0.1443	0.1609	0.1566	0.1717	0.1631	0.1753	0.1789	0.1926	0.1912	0.1912	0.2027	0.2114	0.2172	0.2338	0.1991	0.2244	0.2266	0.2201	0.2496	0.2504	0.2525	0.2258	0.2302	0.2244	0.2374	0.2165	0.2027	0.1926	0.2237	0.2698	0.2944	0.2273	0.2215	0.1825	0.1724	0.1659	0.176	0.2121	0.3896
Fungi_Release38	dacryopinax_primogenitus	C	0.1919	0.2056	0.2056	0.2208	0.2309	0.2468	0.2706	0.2648	0.2821	0.3074	0.2958	0.2886	0.2886	0.2727	0.272	0.259	0.2727	0.2583	0.2374	0.2597	0.2352	0.202	0.2338	0.228	0.2049	0.2085	0.1833	0.1991	0.2136	0.254	0.2172	0.2258	0.2042	0.2309	0.2424	0.2792	0.2215	0.1999	0.1919	0.1999	0.1234	0.1017	0.0649	0.0794	0.07	0.1147	0.0801
Fungi_Release38	dacryopinax_primogenitus	G	0.3196	0.3297	0.2929	0.3059	0.2785	0.2504	0.2482	0.2338	0.21	0.1782	0.1847	0.1818	0.2006	0.197	0.2013	0.2107	0.2201	0.2251	0.246	0.246	0.2727	0.2648	0.2763	0.2814	0.3225	0.2973	0.3045	0.3088	0.2821	0.2929	0.2857	0.2698	0.2713	0.2843	0.2475	0.2323	0.2309	0.2612	0.272	0.3225	0.4827	0.5527	0.6097	0.5909	0.6566	0.5079	0.4791
Fungi_Release38	dacryopinax_primogenitus	T	0.3052	0.2958	0.3225	0.3059	0.3139	0.3312	0.3218	0.3297	0.3636	0.3535	0.3629	0.3579	0.3478	0.355	0.3478	0.3377	0.316	0.3254	0.3139	0.2828	0.2749	0.2994	0.2908	0.2662	0.246	0.2742	0.2626	0.2417	0.2518	0.2273	0.267	0.2799	0.2872	0.2684	0.3074	0.2958	0.324	0.2691	0.2417	0.2504	0.1724	0.1631	0.153	0.1638	0.0974	0.1652	0.0512
Fungi_Release38	grifola_frondosa	A	0.2091	0.1879	0.1985	0.2234	0.2106	0.2038	0.2083	0.2	0.2075	0.2128	0.2038	0.2053	0.2211	0.2158	0.197	0.2106	0.2091	0.2151	0.2143	0.2174	0.2317	0.2136	0.2302	0.2083	0.2226	0.2023	0.2279	0.2113	0.2257	0.2294	0.2362	0.2166	0.234	0.2257	0.237	0.2438	0.2498	0.2211	0.2098	0.1525	0.1834	0.1683	0.1804	0.1842	0.1834	0.2143	0.3208
Fungi_Release38	grifola_frondosa	C	0.1955	0.2309	0.2219	0.24	0.2574	0.2468	0.2574	0.2536	0.2634	0.246	0.2536	0.2506	0.2747	0.2491	0.2521	0.2581	0.2536	0.2491	0.2475	0.234	0.2506	0.2257	0.2453	0.2325	0.2302	0.234	0.2415	0.24	0.2234	0.2453	0.2332	0.2445	0.2566	0.2355	0.2196	0.2287	0.2143	0.2196	0.2113	0.1962	0.1268	0.1253	0.1072	0.117	0.1094	0.1321	0.0823
Fungi_Release38	grifola_frondosa	G	0.3034	0.3102	0.2694	0.2558	0.2536	0.234	0.2468	0.2536	0.2249	0.2543	0.2257	0.2294	0.2068	0.2445	0.2392	0.2362	0.2272	0.2408	0.2506	0.2408	0.2475	0.2672	0.2589	0.2687	0.2551	0.2702	0.2325	0.246	0.2513	0.2317	0.2302	0.2332	0.2302	0.2174	0.2211	0.2332	0.2581	0.2898	0.317	0.3713	0.523	0.5638	0.5849	0.5275	0.5811	0.4536	0.4996
Fungi_Release38	grifola_frondosa	T	0.2921	0.2709	0.3102	0.2808	0.2785	0.3155	0.2875	0.2928	0.3042	0.2868	0.317	0.3147	0.2974	0.2906	0.3117	0.2951	0.3102	0.2951	0.2875	0.3079	0.2702	0.2936	0.2657	0.2906	0.2921	0.2936	0.2981	0.3026	0.2996	0.2936	0.3004	0.3057	0.2792	0.3215	0.3223	0.2943	0.2777	0.2694	0.2619	0.28	0.1668	0.1426	0.1275	0.1713	0.126	0.2	0.0974
Fungi_Release38	kwoniella_bestiolae_cbs_10118	A	0.2308	0.2215	0.2308	0.2392	0.2354	0.2508	0.2254	0.2431	0.25	0.2369	0.2531	0.29	0.2654	0.2831	0.29	0.2662	0.2769	0.29	0.2808	0.3	0.2838	0.2777	0.2854	0.2823	0.2469	0.2815	0.2662	0.2392	0.2438	0.2377	0.2846	0.29	0.2354	0.2238	0.2254	0.2108	0.2185	0.2162	0.1992	0.1315	0.1692	0.1446	0.1431	0.2031	0.25	0.2392	0.5638
Fungi_Release38	kwoniella_bestiolae_cbs_10118	C	0.2423	0.2338	0.2408	0.2469	0.2338	0.2423	0.2415	0.24	0.2315	0.2354	0.2231	0.2008	0.2054	0.1946	0.1731	0.1808	0.1823	0.1546	0.1762	0.1792	0.1815	0.1885	0.1762	0.1731	0.1815	0.1762	0.1769	0.2023	0.1862	0.1708	0.15	0.1746	0.1762	0.16	0.1877	0.1562	0.1415	0.1385	0.1254	0.1292	0.0685	0.0608	0.0492	0.05	0.0708	0.0877	0.0331
Fungi_Release38	kwoniella_bestiolae_cbs_10118	G	0.2069	0.2262	0.2231	0.2169	0.2146	0.1969	0.2146	0.2092	0.2238	0.24	0.2531	0.2554	0.2477	0.2515	0.2808	0.2777	0.2946	0.2946	0.2838	0.28	0.2831	0.28	0.2608	0.28	0.2846	0.2669	0.2677	0.2685	0.2292	0.2631	0.2562	0.2277	0.2515	0.2385	0.2431	0.2692	0.3146	0.3192	0.3308	0.3931	0.5762	0.6254	0.6138	0.5523	0.5108	0.41	0.3323
Fungi_Release38	kwoniella_bestiolae_cbs_10118	T	0.32	0.3185	0.3054	0.2969	0.3162	0.31	0.3185	0.3077	0.2946	0.2877	0.2708	0.2538	0.2815	0.2708	0.2562	0.2754	0.2462	0.2608	0.2592	0.2408	0.2515	0.2538	0.2777	0.2646	0.2869	0.2754	0.2892	0.29	0.3408	0.3285	0.3092	0.3077	0.3369	0.3777	0.3438	0.3638	0.3254	0.3262	0.3446	0.3462	0.1862	0.1692	0.1938	0.1946	0.1685	0.2631	0.0708
Fungi_Release38	heterobasidion_irregulare_tc_32_1	A	0.1691	0.183	0.1629	0.1776	0.1737	0.1853	0.1784	0.1645	0.183	0.1822	0.1761	0.1745	0.1722	0.1946	0.173	0.2185	0.2139	0.2077	0.1946	0.1838	0.1923	0.227	0.1745	0.2232	0.2224	0.2131	0.2093	0.1954	0.2178	0.1961	0.2124	0.2008	0.2093	0.2116	0.1915	0.1946	0.2039	0.1714	0.1598	0.1251	0.1498	0.1328	0.1521	0.1606	0.1938	0.1699	0.3629
Fungi_Release38	heterobasidion_irregulare_tc_32_1	C	0.2595	0.2517	0.261	0.2672	0.2772	0.2618	0.2811	0.2788	0.2687	0.271	0.2656	0.2718	0.2687	0.268	0.271	0.2579	0.2456	0.2479	0.2726	0.2533	0.2224	0.2525	0.2641	0.2386	0.2363	0.2695	0.2193	0.2463	0.2139	0.2502	0.2533	0.2456	0.2131	0.2417	0.2718	0.2394	0.2324	0.2347	0.2124	0.234	0.1459	0.1313	0.1042	0.149	0.1259	0.173	0.1066
Fungi_Release38	heterobasidion_irregulare_tc_32_1	G	0.2664	0.2826	0.2625	0.2625	0.2641	0.2471	0.2479	0.2409	0.2541	0.2332	0.2347	0.2417	0.2672	0.2533	0.2641	0.2633	0.2564	0.2571	0.2656	0.2857	0.2942	0.2664	0.288	0.2618	0.2602	0.2479	0.2819	0.2819	0.2687	0.2749	0.251	0.2564	0.2965	0.2463	0.2533	0.3081	0.2965	0.3266	0.3598	0.3792	0.5745	0.6162	0.6162	0.5344	0.5784	0.4695	0.4734
Fungi_Release38	heterobasidion_irregulare_tc_32_1	T	0.305	0.2826	0.3135	0.2927	0.2849	0.3058	0.2927	0.3158	0.2942	0.3135	0.3236	0.312	0.2919	0.2842	0.2919	0.2602	0.2842	0.2873	0.2672	0.2772	0.2911	0.2541	0.2734	0.2764	0.2811	0.2695	0.2896	0.2764	0.2996	0.2788	0.2834	0.2973	0.2811	0.3004	0.2834	0.2579	0.2672	0.2672	0.268	0.2618	0.1297	0.1197	0.1274	0.156	0.1019	0.1876	0.0571
Fungi_Release38	laccaria_bicolor_s238n_h82	A	0.2281	0.21	0.232	0.2053	0.2132	0.2249	0.1904	0.1983	0.2147	0.1928	0.1959	0.2053	0.2171	0.2077	0.2092	0.2241	0.2147	0.2163	0.2328	0.2108	0.2281	0.239	0.2406	0.2547	0.2766	0.2453	0.2563	0.2461	0.2312	0.2555	0.2665	0.2429	0.2484	0.2759	0.2657	0.2571	0.232	0.2594	0.2555	0.174	0.1904	0.2014	0.1936	0.1763	0.2006	0.221	0.3934
Fungi_Release38	laccaria_bicolor_s238n_h82	C	0.1936	0.2147	0.1873	0.2179	0.2288	0.2163	0.2422	0.2367	0.2429	0.2461	0.2312	0.2422	0.2445	0.21	0.2492	0.2688	0.2343	0.2461	0.2249	0.2022	0.2249	0.2045	0.2194	0.2045	0.2038	0.1928	0.1881	0.2241	0.2202	0.1928	0.1959	0.2171	0.1983	0.2202	0.1771	0.2092	0.1944	0.174	0.1787	0.1528	0.1027	0.0815	0.0635	0.0823	0.0964	0.1152	0.0799
Fungi_Release38	laccaria_bicolor_s238n_h82	G	0.2594	0.2665	0.2547	0.2328	0.2241	0.2061	0.2328	0.1983	0.192	0.1928	0.1865	0.1897	0.185	0.1904	0.1967	0.1865	0.2022	0.2163	0.2108	0.2273	0.2281	0.2147	0.2335	0.2218	0.2171	0.2398	0.2751	0.2092	0.2343	0.2406	0.2171	0.2108	0.2312	0.1873	0.21	0.2304	0.2273	0.279	0.2657	0.384	0.529	0.5674	0.5901	0.5282	0.5564	0.4459	0.435
Fungi_Release38	laccaria_bicolor_s238n_h82	T	0.319	0.3088	0.326	0.344	0.3339	0.3527	0.3346	0.3668	0.3503	0.3683	0.3864	0.3629	0.3534	0.3918	0.3448	0.3205	0.3487	0.3213	0.3315	0.3597	0.319	0.3417	0.3064	0.319	0.3025	0.3221	0.2806	0.3205	0.3143	0.3111	0.3205	0.3292	0.3221	0.3166	0.3472	0.3033	0.3464	0.2876	0.3002	0.2892	0.1779	0.1497	0.1528	0.2132	0.1466	0.2179	0.0917
Fungi_Release38	pseudocercospora_fijiensis_cirad86	A	0.2522	0.2176	0.2388	0.2388	0.2184	0.2231	0.2325	0.2207	0.249	0.2333	0.2435	0.2223	0.231	0.2506	0.2325	0.2286	0.2459	0.2286	0.231	0.2482	0.2364	0.2333	0.2388	0.238	0.2537	0.2443	0.2734	0.2608	0.2577	0.2718	0.2467	0.2537	0.2561	0.2553	0.2545	0.2443	0.2333	0.2105	0.2396	0.2042	0.2357	0.2184	0.209	0.2113	0.2137	0.2019	0.2584
Fungi_Release38	pseudocercospora_fijiensis_cirad86	C	0.2011	0.2364	0.2388	0.2168	0.2396	0.2435	0.2372	0.2231	0.2317	0.2302	0.2419	0.2286	0.2113	0.205	0.2152	0.2082	0.2003	0.2262	0.2035	0.1972	0.1822	0.1893	0.1822	0.1964	0.1846	0.1917	0.198	0.1681	0.1932	0.2247	0.2097	0.1948	0.1917	0.2247	0.2011	0.2058	0.1799	0.1697	0.1822	0.2042	0.1265	0.1139	0.1178	0.121	0.1092	0.1359	0.1555
Fungi_Release38	pseudocercospora_fijiensis_cirad86	G	0.3009	0.3056	0.2812	0.3001	0.2954	0.2938	0.3071	0.3119	0.2577	0.2977	0.2742	0.2969	0.3087	0.2962	0.2954	0.315	0.326	0.3095	0.3064	0.3079	0.2914	0.3276	0.3095	0.2867	0.3307	0.3103	0.2859	0.3032	0.2828	0.2907	0.2734	0.2883	0.2977	0.2679	0.2946	0.3205	0.3291	0.3951	0.3559	0.3912	0.4721	0.513	0.5412	0.5295	0.535	0.4925	0.4242
Fungi_Release38	pseudocercospora_fijiensis_cirad86	T	0.2459	0.2404	0.2412	0.2443	0.2467	0.2396	0.2231	0.2443	0.2616	0.2388	0.2404	0.2522	0.249	0.2482	0.2569	0.2482	0.2278	0.2357	0.2592	0.2467	0.2899	0.2498	0.2694	0.2789	0.231	0.2537	0.2427	0.2679	0.2663	0.2129	0.2702	0.2632	0.2545	0.2522	0.2498	0.2294	0.2577	0.2247	0.2223	0.2003	0.1658	0.1548	0.132	0.1383	0.1422	0.1697	0.1618
Fungi_Release38	neolentinus_lepideus_hhb14362_ss_1	A	0.2013	0.1956	0.1948	0.1899	0.1874	0.207	0.2021	0.1809	0.2078	0.1801	0.1989	0.2103	0.2095	0.207	0.2306	0.216	0.2062	0.2192	0.2209	0.2258	0.2135	0.2258	0.2363	0.2298	0.2347	0.2331	0.2608	0.251	0.207	0.22	0.2681	0.2266	0.2673	0.2412	0.2608	0.2592	0.2828	0.2429	0.2339	0.1622	0.1638	0.1614	0.1679	0.176	0.2184	0.1997	0.3382
Fungi_Release38	neolentinus_lepideus_hhb14362_ss_1	C	0.2029	0.1964	0.2217	0.238	0.2404	0.2062	0.2535	0.2461	0.2526	0.2551	0.2412	0.2453	0.2249	0.2323	0.2086	0.2176	0.2421	0.2274	0.2184	0.2095	0.2095	0.2029	0.1964	0.1948	0.2323	0.2119	0.1866	0.2217	0.2192	0.2192	0.1793	0.2054	0.198	0.2306	0.1923	0.2176	0.1703	0.2086	0.1793	0.2013	0.1133	0.0913	0.0986	0.1271	0.0815	0.1263	0.0856
Fungi_Release38	neolentinus_lepideus_hhb14362_ss_1	G	0.291	0.2771	0.2673	0.2665	0.2502	0.2396	0.2021	0.2266	0.2315	0.2029	0.2339	0.229	0.2266	0.229	0.2233	0.2372	0.2445	0.2616	0.2592	0.2689	0.2975	0.2673	0.2738	0.3064	0.2641	0.2673	0.2738	0.2584	0.2722	0.2543	0.2347	0.2559	0.2404	0.2225	0.2412	0.2323	0.2469	0.2869	0.3138	0.3562	0.5526	0.6104	0.5982	0.5118	0.5827	0.4295	0.4898
Fungi_Release38	neolentinus_lepideus_hhb14362_ss_1	T	0.3048	0.3309	0.3162	0.3056	0.3219	0.3472	0.3423	0.3464	0.3081	0.3619	0.326	0.3154	0.339	0.3317	0.3374	0.3293	0.3073	0.2918	0.3015	0.2958	0.2795	0.304	0.2934	0.2689	0.2689	0.2877	0.2787	0.2689	0.3015	0.3064	0.3178	0.3121	0.2942	0.3056	0.3056	0.291	0.2999	0.2616	0.273	0.2804	0.1703	0.1369	0.1353	0.185	0.1174	0.2445	0.0864
Fungi_Release38	peniophora_sp_cont	A	0.2186	0.1721	0.2015	0.1794	0.1729	0.186	0.2088	0.1803	0.1835	0.2039	0.1925	0.2365	0.2015	0.2072	0.2137	0.2047	0.2333	0.2104	0.2064	0.2235	0.2325	0.2202	0.2308	0.2447	0.2512	0.2431	0.2308	0.2537	0.2414	0.2529	0.2341	0.2488	0.2308	0.2333	0.2463	0.2341	0.3271	0.2765	0.2781	0.1835	0.208	0.1713	0.1705	0.177	0.2007	0.1974	0.3809
Fungi_Release38	peniophora_sp_cont	C	0.2129	0.2357	0.2145	0.2471	0.2643	0.2708	0.2569	0.2716	0.2692	0.2749	0.2814	0.2708	0.2635	0.2423	0.2316	0.2724	0.2431	0.2251	0.2349	0.2512	0.2504	0.2284	0.2545	0.2162	0.2276	0.2129	0.2072	0.217	0.2431	0.2096	0.2145	0.217	0.2153	0.2365	0.2423	0.2365	0.1819	0.2202	0.19	0.2219	0.1093	0.0922	0.0897	0.1183	0.0848	0.1387	0.071
Fungi_Release38	peniophora_sp_cont	G	0.2708	0.2749	0.2716	0.2308	0.2406	0.2121	0.2047	0.2096	0.2145	0.1884	0.177	0.1966	0.2121	0.2194	0.2357	0.2072	0.2259	0.2325	0.2292	0.2333	0.2341	0.2626	0.2447	0.2651	0.2659	0.2618	0.2577	0.2423	0.2406	0.2667	0.2765	0.2455	0.2374	0.2308	0.2064	0.2341	0.2259	0.2325	0.2684	0.3581	0.5375	0.6052	0.6142	0.5294	0.5897	0.4005	0.4535
Fungi_Release38	peniophora_sp_cont	T	0.2977	0.3173	0.3124	0.3426	0.3222	0.3312	0.3295	0.3385	0.3328	0.3328	0.3491	0.2961	0.323	0.3312	0.3189	0.3157	0.2977	0.332	0.3295	0.292	0.283	0.2887	0.27	0.2741	0.2553	0.2822	0.3042	0.2871	0.2749	0.2708	0.2749	0.2887	0.3165	0.2993	0.3051	0.2953	0.2651	0.2708	0.2635	0.2365	0.1452	0.1313	0.1256	0.1754	0.1248	0.2635	0.0946
Fungi_Release38	pisolithus_tinctorius_marx_270	A	0.2291	0.2259	0.225	0.216	0.2177	0.2332	0.2152	0.2275	0.2152	0.1964	0.2029	0.2283	0.239	0.2512	0.2259	0.2226	0.2283	0.2365	0.2209	0.2414	0.2169	0.2398	0.261	0.2349	0.2398	0.2398	0.239	0.2218	0.2136	0.2275	0.2185	0.2439	0.2455	0.261	0.2668	0.2406	0.2709	0.2954	0.248	0.189	0.2201	0.1735	0.1931	0.2046	0.2201	0.2455	0.3568
Fungi_Release38	pisolithus_tinctorius_marx_270	C	0.1759	0.1956	0.1972	0.2185	0.2201	0.2406	0.2553	0.2398	0.257	0.2725	0.2676	0.2471	0.2259	0.2471	0.2504	0.243	0.2324	0.2308	0.243	0.2463	0.2422	0.23	0.207	0.234	0.2201	0.2177	0.2152	0.2152	0.2349	0.234	0.2545	0.2324	0.2414	0.2144	0.2447	0.2136	0.2054	0.2062	0.18	0.1972	0.144	0.1064	0.0786	0.0998	0.0769	0.1187	0.117
Fungi_Release38	pisolithus_tinctorius_marx_270	G	0.2815	0.2897	0.2741	0.239	0.252	0.2177	0.2242	0.2218	0.2185	0.2038	0.2291	0.1956	0.2152	0.1956	0.2169	0.2169	0.2308	0.23	0.2488	0.2291	0.2422	0.2545	0.2422	0.2488	0.248	0.2406	0.2422	0.252	0.2324	0.243	0.2349	0.2234	0.2054	0.2169	0.2013	0.2111	0.2439	0.2627	0.2921	0.3502	0.473	0.5736	0.608	0.5319	0.5753	0.4615	0.4247
Fungi_Release38	pisolithus_tinctorius_marx_270	T	0.3134	0.2889	0.3036	0.3265	0.3101	0.3085	0.3052	0.311	0.3093	0.3273	0.3003	0.329	0.32	0.3061	0.3069	0.3175	0.3085	0.3028	0.2872	0.2831	0.2987	0.2758	0.2897	0.2823	0.2921	0.302	0.3036	0.311	0.3191	0.2954	0.2921	0.3003	0.3077	0.3077	0.2872	0.3347	0.2799	0.2357	0.2799	0.2635	0.1628	0.1465	0.1203	0.1637	0.1277	0.1743	0.1015
Fungi_Release38	puccinia_graminisug99	A	0.2758	0.2668	0.266	0.2766	0.2815	0.2782	0.261	0.2881	0.2381	0.2872	0.2921	0.266	0.2619	0.2635	0.2635	0.2774	0.2643	0.2864	0.284	0.252	0.266	0.2512	0.27	0.2332	0.2422	0.2291	0.2561	0.2185	0.2283	0.2308	0.2021	0.2209	0.2062	0.2103	0.1923	0.1735	0.1489	0.1416	0.1506	0.1178	0.1669	0.1882	0.2242	0.266	0.3134	0.3257	0.4607
Fungi_Release38	puccinia_graminisug99	C	0.2242	0.2144	0.2136	0.2324	0.207	0.243	0.2136	0.2005	0.2046	0.1923	0.1972	0.2021	0.1997	0.1915	0.2128	0.1931	0.1858	0.1997	0.1858	0.1841	0.1948	0.1939	0.171	0.1792	0.1784	0.2267	0.1678	0.1948	0.1841	0.1784	0.1956	0.1727	0.1628	0.1669	0.1628	0.1702	0.1776	0.1571	0.1375	0.1498	0.0655	0.0794	0.0565	0.0818	0.0835	0.1121	0.0867
Fungi_Release38	puccinia_graminisug99	G	0.1841	0.207	0.1874	0.2038	0.2103	0.189	0.207	0.2054	0.1841	0.1817	0.1931	0.2046	0.2038	0.2103	0.2079	0.1882	0.1997	0.1939	0.1931	0.2038	0.1939	0.1866	0.2021	0.2005	0.2054	0.1923	0.189	0.2218	0.2062	0.1989	0.2111	0.2316	0.2226	0.2119	0.2242	0.2709	0.3028	0.3388	0.3584	0.4329	0.6007	0.5974	0.5638	0.4738	0.4493	0.3429	0.3298
Fungi_Release38	puccinia_graminisug99	T	0.3159	0.3118	0.3331	0.2872	0.3011	0.2897	0.3183	0.3061	0.3732	0.3388	0.3175	0.3273	0.3347	0.3347	0.3159	0.3412	0.3502	0.32	0.3372	0.3601	0.3453	0.3682	0.3568	0.3871	0.374	0.3519	0.3871	0.365	0.3813	0.392	0.3912	0.3748	0.4083	0.4108	0.4206	0.3854	0.3707	0.3625	0.3535	0.2995	0.1669	0.135	0.1555	0.1784	0.1538	0.2193	0.1227
Fungi_Release38	pisolithus_microcarpus_441	A	0.1893	0.2286	0.2219	0.2194	0.2253	0.2035	0.2085	0.201	0.2161	0.2194	0.2069	0.2152	0.2119	0.2253	0.1993	0.1809	0.2253	0.2245	0.2127	0.2295	0.2446	0.2194	0.2613	0.2152	0.2278	0.2655	0.2462	0.2487	0.2236	0.2563	0.2286	0.2563	0.2479	0.2446	0.2312	0.227	0.2881	0.2487	0.2672	0.1683	0.2027	0.1725	0.1901	0.1985	0.2446	0.2102	0.371
Fungi_Release38	pisolithus_microcarpus_441	C	0.1717	0.1876	0.2002	0.2353	0.2027	0.2613	0.2446	0.242	0.2554	0.2655	0.2672	0.2454	0.2588	0.273	0.2621	0.2739	0.2278	0.2412	0.2437	0.2571	0.2446	0.2303	0.2219	0.2127	0.2194	0.2152	0.2337	0.2345	0.2479	0.2446	0.2345	0.2529	0.237	0.2395	0.2245	0.2479	0.1884	0.2119	0.1826	0.2178	0.1206	0.0963	0.108	0.1315	0.0804	0.134	0.0938
Fungi_Release38	pisolithus_microcarpus_441	G	0.3208	0.2789	0.2789	0.2219	0.2454	0.2395	0.2186	0.2044	0.2077	0.2178	0.2178	0.227	0.2136	0.2094	0.2228	0.1993	0.2286	0.2529	0.2186	0.2353	0.2538	0.2479	0.2672	0.2663	0.2513	0.2513	0.2345	0.2312	0.237	0.2228	0.2362	0.2002	0.2018	0.2035	0.2119	0.2228	0.2513	0.2931	0.2864	0.3492	0.526	0.5871	0.557	0.5151	0.5385	0.4531	0.4447
Fungi_Release38	pisolithus_microcarpus_441	T	0.3183	0.3049	0.299	0.3233	0.3266	0.2956	0.3283	0.3526	0.3208	0.2973	0.3082	0.3124	0.3157	0.2923	0.3157	0.3459	0.3183	0.2814	0.325	0.2781	0.2571	0.3023	0.2496	0.3057	0.3015	0.268	0.2856	0.2856	0.2915	0.2764	0.3007	0.2906	0.3132	0.3124	0.3325	0.3023	0.2722	0.2462	0.2638	0.2647	0.1508	0.1441	0.1449	0.1549	0.1365	0.2027	0.0905
Fungi_Release38	daedalea_quercina_l_15889	A	0.2215	0.1678	0.1896	0.1711	0.198	0.1988	0.1812	0.1812	0.1787	0.1779	0.2022	0.1997	0.1762	0.2013	0.1678	0.1862	0.1871	0.2215	0.1837	0.1921	0.2148	0.1988	0.2164	0.2089	0.2089	0.224	0.2047	0.2164	0.2114	0.2089	0.2081	0.2081	0.2399	0.2215	0.2164	0.2307	0.2576	0.271	0.2441	0.1535	0.1904	0.1401	0.1502	0.1686	0.1837	0.1586	0.354
Fungi_Release38	daedalea_quercina_l_15889	C	0.2299	0.224	0.2324	0.2592	0.2659	0.2626	0.3029	0.2928	0.2936	0.3003	0.2643	0.2852	0.245	0.2743	0.297	0.2676	0.2777	0.2483	0.2542	0.2777	0.2408	0.2559	0.2466	0.2416	0.2416	0.2299	0.2567	0.245	0.2525	0.255	0.2534	0.2391	0.2391	0.2542	0.2517	0.2374	0.2122	0.2408	0.2416	0.2383	0.1351	0.1124	0.1233	0.1376	0.1116	0.1871	0.0831
Fungi_Release38	daedalea_quercina_l_15889	G	0.2894	0.307	0.2878	0.2559	0.229	0.2559	0.2299	0.2181	0.25	0.2232	0.2307	0.2458	0.2685	0.2156	0.2525	0.255	0.2668	0.2399	0.2886	0.2609	0.2785	0.2936	0.2768	0.2836	0.2903	0.2886	0.2945	0.2576	0.2718	0.2668	0.2534	0.2576	0.2265	0.2299	0.2408	0.2508	0.2592	0.2752	0.2794	0.3784	0.5503	0.6208	0.6133	0.5143	0.599	0.4639	0.5101
Fungi_Release38	daedalea_quercina_l_15889	T	0.2592	0.3012	0.2903	0.3138	0.307	0.2827	0.2861	0.3079	0.2777	0.2987	0.3029	0.2693	0.3104	0.3087	0.2827	0.2911	0.2685	0.2903	0.2735	0.2693	0.2659	0.2517	0.2601	0.2659	0.2592	0.2576	0.2441	0.281	0.2643	0.2693	0.2852	0.2953	0.2945	0.2945	0.2911	0.281	0.271	0.2131	0.2349	0.2299	0.1242	0.1267	0.1133	0.1795	0.1057	0.1904	0.0529
Fungi_Release38	sistotremastrum_niveocremeum_hhb9708	A	0.2013	0.1837	0.1787	0.1988	0.1753	0.1963	0.1795	0.1703	0.1921	0.1804	0.1955	0.1846	0.1871	0.1871	0.1921	0.1988	0.2198	0.219	0.2315	0.2366	0.224	0.2525	0.2315	0.2332	0.2424	0.2483	0.2794	0.2525	0.2567	0.2248	0.2592	0.2676	0.2777	0.2592	0.2408	0.2039	0.2592	0.2886	0.2844	0.2081	0.1862	0.172	0.1535	0.1737	0.2022	0.1971	0.3507
Fungi_Release38	sistotremastrum_niveocremeum_hhb9708	C	0.2114	0.2282	0.229	0.2257	0.2542	0.2643	0.2659	0.2752	0.2659	0.2995	0.2685	0.2651	0.25	0.2718	0.2441	0.2206	0.2391	0.2215	0.2156	0.1946	0.2097	0.1938	0.1997	0.1955	0.1888	0.1837	0.177	0.2114	0.1862	0.1904	0.1804	0.1418	0.1695	0.1955	0.1904	0.2299	0.151	0.1493	0.156	0.1611	0.0931	0.0696	0.073	0.0763	0.0612	0.1124	0.0621
Fungi_Release38	sistotremastrum_niveocremeum_hhb9708	G	0.2651	0.2802	0.2399	0.229	0.2064	0.1846	0.2013	0.1753	0.1703	0.1577	0.1703	0.1938	0.177	0.182	0.2122	0.2039	0.1971	0.2148	0.2349	0.2391	0.2349	0.2374	0.2475	0.2685	0.2601	0.2685	0.2458	0.2534	0.2559	0.2651	0.2567	0.25	0.2466	0.25	0.2039	0.2366	0.2559	0.2869	0.2844	0.3364	0.5252	0.5881	0.6292	0.5587	0.6183	0.4295	0.5017
Fungi_Release38	sistotremastrum_niveocremeum_hhb9708	T	0.3221	0.3079	0.3523	0.3465	0.3641	0.3549	0.3532	0.3792	0.3716	0.3624	0.3658	0.3565	0.3859	0.3591	0.3515	0.3767	0.344	0.3448	0.318	0.3297	0.3314	0.3163	0.3213	0.3029	0.3087	0.2995	0.2978	0.2827	0.3012	0.3196	0.3037	0.3406	0.3062	0.2953	0.3649	0.3297	0.3339	0.2752	0.2752	0.2945	0.1955	0.1703	0.1443	0.1913	0.1183	0.2609	0.0856
Fungi_Release38	botryobasidium_botryosum_fd_172_ss1	A	0.2034	0.2	0.1874	0.1992	0.2034	0.1857	0.2244	0.1992	0.216	0.2151	0.205	0.2277	0.2244	0.216	0.2361	0.2227	0.2126	0.221	0.2244	0.2336	0.1983	0.2445	0.2462	0.2613	0.2496	0.2496	0.2336	0.2319	0.2429	0.2471	0.258	0.2378	0.2252	0.2311	0.2294	0.2109	0.2151	0.1815	0.158	0.1109	0.1445	0.1437	0.1429	0.1849	0.2101	0.2546	0.4008
Fungi_Release38	botryobasidium_botryosum_fd_172_ss1	C	0.2563	0.2655	0.2924	0.2672	0.2739	0.2849	0.2824	0.2588	0.279	0.2664	0.2983	0.2555	0.2496	0.2588	0.2714	0.2336	0.2588	0.2739	0.2597	0.237	0.2588	0.2353	0.2462	0.2361	0.2521	0.2445	0.2269	0.2101	0.2395	0.2151	0.2218	0.2303	0.2261	0.2571	0.2059	0.2227	0.2202	0.2185	0.2118	0.1882	0.1151	0.1126	0.095	0.1143	0.1134	0.1328	0.1
Fungi_Release38	botryobasidium_botryosum_fd_172_ss1	G	0.2059	0.2017	0.2084	0.1933	0.2	0.216	0.1924	0.2118	0.1798	0.1958	0.2067	0.2042	0.1933	0.2017	0.2076	0.2101	0.2218	0.2303	0.2126	0.221	0.2437	0.216	0.2218	0.2025	0.2227	0.2067	0.2202	0.2328	0.2151	0.2134	0.1866	0.1983	0.2294	0.1992	0.1916	0.2345	0.2412	0.2479	0.2824	0.3655	0.5756	0.5966	0.6277	0.5168	0.5672	0.3966	0.4277
Fungi_Release38	botryobasidium_botryosum_fd_172_ss1	T	0.3345	0.3328	0.3118	0.3403	0.3227	0.3134	0.3008	0.3303	0.3252	0.3227	0.2899	0.3126	0.3328	0.3235	0.2849	0.3336	0.3067	0.2748	0.3034	0.3084	0.2992	0.3042	0.2857	0.3	0.2756	0.2992	0.3193	0.3252	0.3025	0.3244	0.3336	0.3336	0.3193	0.3126	0.3731	0.3319	0.3235	0.3521	0.3479	0.3353	0.1647	0.1471	0.1345	0.184	0.1092	0.216	0.0714
Fungi_Release38	scleroderma_citrinum_foug_a	A	0.2226	0.2192	0.2294	0.1963	0.2319	0.2099	0.2302	0.2048	0.2133	0.2396	0.2141	0.2014	0.2218	0.2234	0.209	0.2302	0.215	0.2336	0.2447	0.2201	0.2404	0.2515	0.2379	0.2345	0.2277	0.2277	0.2557	0.2489	0.2175	0.2243	0.2489	0.2421	0.26	0.254	0.2455	0.2396	0.2693	0.2829	0.2744	0.1912	0.2099	0.1776	0.1903	0.1886	0.2218	0.2234	0.4002
Fungi_Release38	scleroderma_citrinum_foug_a	C	0.1878	0.1988	0.1852	0.2133	0.2133	0.2438	0.2184	0.2387	0.2753	0.2557	0.2336	0.2413	0.2353	0.2362	0.2481	0.2226	0.2396	0.2311	0.2311	0.2404	0.2506	0.226	0.2133	0.2489	0.2192	0.2158	0.2005	0.2243	0.226	0.2481	0.2506	0.2116	0.2031	0.2455	0.2472	0.2379	0.2184	0.2294	0.1869	0.1971	0.1054	0.1062	0.096	0.1189	0.0799	0.1121	0.1121
Fungi_Release38	scleroderma_citrinum_foug_a	G	0.2974	0.2838	0.2897	0.2523	0.2294	0.2489	0.2141	0.2209	0.1997	0.1844	0.2082	0.2175	0.2124	0.2175	0.2014	0.2345	0.2167	0.2099	0.2201	0.2285	0.2065	0.2311	0.2277	0.243	0.2184	0.2608	0.2209	0.2133	0.2396	0.2464	0.1844	0.2218	0.2167	0.209	0.1793	0.198	0.2336	0.2625	0.2914	0.3263	0.5361	0.5769	0.5888	0.52	0.5531	0.4562	0.3917
Fungi_Release38	scleroderma_citrinum_foug_a	T	0.2923	0.2982	0.2957	0.3381	0.3254	0.2974	0.3373	0.3356	0.3118	0.3203	0.3441	0.3398	0.3305	0.3229	0.3415	0.3127	0.3288	0.3254	0.3042	0.311	0.3025	0.2914	0.3212	0.2736	0.3347	0.2957	0.3229	0.3135	0.3169	0.2812	0.3161	0.3246	0.3203	0.2914	0.328	0.3246	0.2787	0.2251	0.2472	0.2855	0.1487	0.1393	0.1249	0.1725	0.1453	0.2082	0.096
Fungi_Release38	sistotremastrum_suecicum_hhb10207_ss_3	A	0.1892	0.1642	0.1866	0.1995	0.1702	0.1892	0.172	0.1651	0.2012	0.1917	0.1866	0.2064	0.2055	0.2046	0.2021	0.1986	0.2124	0.2279	0.2416	0.2408	0.2124	0.2408	0.2373	0.2476	0.2691	0.258	0.2674	0.2494	0.2691	0.2227	0.2846	0.2545	0.2657	0.2528	0.2468	0.2055	0.2545	0.2829	0.2794	0.2132	0.1978	0.1754	0.1359	0.1634	0.2064	0.1935	0.3482
Fungi_Release38	sistotremastrum_suecicum_hhb10207_ss_3	C	0.2081	0.2365	0.233	0.2408	0.239	0.2519	0.2554	0.2614	0.2752	0.2898	0.2451	0.2554	0.2459	0.2597	0.2468	0.2279	0.239	0.2347	0.221	0.2038	0.1995	0.2193	0.2089	0.1917	0.1685	0.1711	0.184	0.2167	0.1771	0.1745	0.1711	0.1565	0.1634	0.1917	0.1935	0.2072	0.1711	0.1376	0.172	0.1556	0.098	0.0688	0.0739	0.0903	0.0602	0.1032	0.0636
Fungi_Release38	sistotremastrum_suecicum_hhb10207_ss_3	G	0.27	0.2588	0.2425	0.2244	0.2253	0.1952	0.1857	0.1728	0.1651	0.1488	0.1788	0.172	0.1754	0.1797	0.2003	0.2012	0.1986	0.2021	0.2201	0.2107	0.233	0.2261	0.2442	0.2666	0.2588	0.27	0.2459	0.2511	0.2588	0.282	0.2442	0.2442	0.2485	0.2184	0.2046	0.2485	0.2502	0.2743	0.2803	0.3379	0.515	0.5847	0.6466	0.5666	0.6139	0.4213	0.5125
Fungi_Release38	sistotremastrum_suecicum_hhb10207_ss_3	T	0.3328	0.3405	0.3379	0.3353	0.3654	0.3637	0.3869	0.4007	0.3586	0.3697	0.3895	0.3663	0.3732	0.356	0.3508	0.3723	0.35	0.3353	0.3173	0.3448	0.3551	0.3138	0.3095	0.2941	0.3035	0.3009	0.3027	0.2829	0.2949	0.3207	0.3001	0.3448	0.3224	0.3371	0.3551	0.3388	0.3242	0.3052	0.2683	0.2932	0.1892	0.1711	0.1436	0.1797	0.1195	0.282	0.0757
Fungi_Release38	kwoniella_dejecticola_cbs_10117	A	0.2613	0.2318	0.2578	0.2587	0.23	0.2543	0.2561	0.2543	0.2448	0.2509	0.2613	0.2439	0.2682	0.2882	0.2648	0.2569	0.2587	0.276	0.2622	0.2665	0.2569	0.2578	0.2891	0.2604	0.2474	0.2552	0.2604	0.2613	0.2569	0.2613	0.2604	0.2491	0.2405	0.2135	0.2153	0.2205	0.2491	0.2378	0.171	0.1406	0.1762	0.1536	0.1806	0.1797	0.2422	0.2656	0.4974
Fungi_Release38	kwoniella_dejecticola_cbs_10117	C	0.2352	0.2491	0.2448	0.2413	0.2483	0.2448	0.2491	0.23	0.217	0.2292	0.2326	0.2396	0.2361	0.2144	0.2179	0.1962	0.1944	0.2075	0.2023	0.2422	0.2101	0.2109	0.1962	0.204	0.2179	0.2005	0.2057	0.2344	0.2109	0.1944	0.2222	0.1953	0.2135	0.2326	0.2023	0.1884	0.1519	0.1658	0.1701	0.1719	0.0885	0.0781	0.0851	0.112	0.0825	0.1233	0.0486
Fungi_Release38	kwoniella_dejecticola_cbs_10117	G	0.2161	0.2326	0.2214	0.2387	0.224	0.224	0.2222	0.2344	0.25	0.2318	0.2205	0.2778	0.2361	0.237	0.2465	0.2743	0.2812	0.2682	0.2882	0.2405	0.2778	0.2552	0.2587	0.2665	0.2665	0.2743	0.2622	0.2283	0.2196	0.263	0.2161	0.2509	0.2665	0.2396	0.2344	0.2613	0.2665	0.2717	0.2899	0.3932	0.5599	0.6198	0.5851	0.5095	0.5252	0.3837	0.3672
Fungi_Release38	kwoniella_dejecticola_cbs_10117	T	0.2873	0.2865	0.276	0.2613	0.2977	0.2769	0.2726	0.2812	0.2882	0.2882	0.2856	0.2387	0.2595	0.2604	0.2708	0.2726	0.2656	0.2483	0.2474	0.2509	0.2552	0.276	0.2561	0.2691	0.2682	0.27	0.2717	0.276	0.3125	0.2812	0.3012	0.3047	0.2795	0.3142	0.3481	0.3299	0.3325	0.3247	0.3689	0.2943	0.1753	0.1484	0.1493	0.1988	0.1502	0.2274	0.0868
Fungi_Release38	tulasnella_calospora_mut_4182	A	0.2337	0.2188	0.2441	0.2145	0.2119	0.2319	0.2267	0.2267	0.2206	0.2328	0.1935	0.2258	0.238	0.2424	0.2441	0.2424	0.2371	0.2232	0.2415	0.2241	0.2406	0.2127	0.2546	0.2546	0.2528	0.2319	0.2459	0.238	0.2467	0.2537	0.272	0.2441	0.2153	0.2188	0.2398	0.2249	0.2145	0.204	0.1648	0.1325	0.1639	0.1308	0.1552	0.2005	0.238	0.2668	0.4255
Fungi_Release38	tulasnella_calospora_mut_4182	C	0.2345	0.265	0.2677	0.2685	0.2624	0.2528	0.2554	0.2607	0.2493	0.2572	0.279	0.272	0.2363	0.2432	0.2232	0.2598	0.265	0.2598	0.2476	0.2633	0.2398	0.2432	0.2467	0.2493	0.2424	0.2616	0.2345	0.2633	0.2371	0.231	0.2406	0.2807	0.245	0.2764	0.2528	0.2537	0.2171	0.2345	0.2267	0.2537	0.1351	0.1168	0.1011	0.1107	0.1343	0.1465	0.1029
Fungi_Release38	tulasnella_calospora_mut_4182	G	0.2371	0.2284	0.2337	0.2162	0.2232	0.231	0.2328	0.2214	0.2319	0.2049	0.2258	0.2162	0.2171	0.2406	0.2493	0.2136	0.2319	0.2302	0.2293	0.2354	0.2363	0.2467	0.2223	0.2371	0.2293	0.2293	0.2267	0.231	0.2302	0.2188	0.1918	0.1901	0.231	0.2084	0.1988	0.2101	0.2345	0.2511	0.2799	0.3365	0.5283	0.6225	0.6199	0.5405	0.4786	0.4089	0.3705
Fungi_Release38	tulasnella_calospora_mut_4182	T	0.2947	0.2877	0.2546	0.3008	0.3025	0.2842	0.2851	0.2912	0.2982	0.3051	0.3017	0.286	0.3086	0.2738	0.2833	0.2842	0.2659	0.2868	0.2816	0.2772	0.2833	0.2973	0.2764	0.2589	0.2755	0.2772	0.2929	0.2677	0.286	0.2964	0.2956	0.2851	0.3086	0.2964	0.3086	0.3112	0.3339	0.3104	0.3287	0.2772	0.1726	0.1299	0.1238	0.1482	0.1491	0.1779	0.1011
Fungi_Release38	laccaria_amethystina_laam_08_1	A	0.2236	0.2044	0.1948	0.2052	0.1991	0.1991	0.2096	0.1773	0.1983	0.1895	0.1878	0.1878	0.2079	0.1764	0.1948	0.1808	0.2017	0.2096	0.2367	0.2105	0.2314	0.2262	0.2271	0.2332	0.2454	0.2646	0.2437	0.2559	0.2376	0.2402	0.248	0.2393	0.2594	0.2664	0.2742	0.2419	0.2524	0.2463	0.2611	0.1799	0.1974	0.1834	0.1974	0.2227	0.2227	0.2201	0.3965
Fungi_Release38	laccaria_amethystina_laam_08_1	C	0.1948	0.2253	0.2044	0.2253	0.2306	0.2105	0.2157	0.2463	0.2384	0.2681	0.2646	0.2367	0.2279	0.2341	0.2463	0.255	0.2314	0.2402	0.2279	0.2323	0.2306	0.2253	0.2314	0.1974	0.2166	0.1939	0.2035	0.2017	0.2166	0.2192	0.214	0.241	0.1983	0.2175	0.1721	0.207	0.1572	0.1738	0.1703	0.1546	0.0786	0.0987	0.0812	0.0838	0.0908	0.1153	0.0891
Fungi_Release38	laccaria_amethystina_laam_08_1	G	0.2725	0.2725	0.2585	0.2192	0.2026	0.193	0.1808	0.2122	0.1852	0.1712	0.1773	0.1878	0.2009	0.1817	0.1834	0.1834	0.2218	0.1939	0.186	0.207	0.2061	0.2384	0.2096	0.2349	0.2376	0.2079	0.2489	0.2262	0.2288	0.2122	0.2166	0.1712	0.214	0.193	0.1974	0.2227	0.2568	0.2952	0.2943	0.3852	0.531	0.5659	0.5607	0.5249	0.5459	0.4437	0.4148
Fungi_Release38	laccaria_amethystina_laam_08_1	T	0.3092	0.2978	0.3424	0.3502	0.3677	0.3974	0.3939	0.3642	0.3782	0.3712	0.3703	0.3878	0.3633	0.4079	0.3755	0.3808	0.345	0.3563	0.3493	0.3502	0.3319	0.31	0.3319	0.3345	0.3004	0.3336	0.3039	0.3162	0.317	0.3284	0.3214	0.3485	0.3284	0.3231	0.3563	0.3284	0.3336	0.2847	0.2742	0.2803	0.193	0.152	0.1607	0.1686	0.1406	0.221	0.0996
Fungi_Release38	phlebiopsis_gigantea_11061_1_cr5_6	A	0.1559	0.1806	0.1806	0.1965	0.1736	0.1551	0.1771	0.1727	0.1824	0.1815	0.1771	0.1859	0.1762	0.1974	0.1744	0.1859	0.1727	0.2026	0.1815	0.2079	0.2044	0.1903	0.1991	0.2132	0.2141	0.1912	0.2194	0.2264	0.2035	0.2097	0.215	0.2115	0.2335	0.2414	0.222	0.2079	0.2819	0.2855	0.2652	0.1524	0.1674	0.1454	0.1383	0.1498	0.1762	0.1533	0.3463
Fungi_Release38	phlebiopsis_gigantea_11061_1_cr5_6	C	0.2273	0.2317	0.2493	0.2722	0.2987	0.2987	0.3084	0.3084	0.3119	0.2934	0.3145	0.2907	0.2916	0.2996	0.304	0.2872	0.2705	0.2996	0.2855	0.2907	0.274	0.2863	0.2705	0.2379	0.2837	0.2396	0.23	0.2802	0.2855	0.2502	0.274	0.2749	0.2405	0.2573	0.2767	0.2899	0.2176	0.2529	0.2388	0.2537	0.1524	0.141	0.1181	0.1604	0.1233	0.1965	0.096
Fungi_Release38	phlebiopsis_gigantea_11061_1_cr5_6	G	0.3427	0.304	0.2987	0.2661	0.2634	0.2529	0.2238	0.2361	0.2317	0.2053	0.2132	0.2229	0.2229	0.2088	0.2352	0.222	0.2555	0.2441	0.2661	0.259	0.2634	0.2564	0.2925	0.2934	0.2714	0.2987	0.2943	0.2529	0.2546	0.2767	0.2705	0.2423	0.2652	0.2256	0.2273	0.2282	0.2352	0.2634	0.2767	0.3559	0.5577	0.5859	0.6282	0.5586	0.6018	0.4599	0.5084
Fungi_Release38	phlebiopsis_gigantea_11061_1_cr5_6	T	0.274	0.2837	0.2714	0.2652	0.2643	0.2934	0.2907	0.2828	0.274	0.3198	0.2952	0.3004	0.3093	0.2943	0.2863	0.3048	0.3013	0.2537	0.267	0.2423	0.2581	0.267	0.2379	0.2555	0.2308	0.2705	0.2564	0.2405	0.2564	0.2634	0.2405	0.2714	0.2608	0.2758	0.274	0.274	0.2652	0.1982	0.2194	0.2379	0.1225	0.1278	0.1154	0.1313	0.0987	0.1903	0.0493
Fungi_Release38	piloderma_croceum_f_1598	A	0.2184	0.1853	0.2247	0.2319	0.2292	0.2104	0.188	0.2023	0.2256	0.2077	0.2292	0.222	0.2175	0.2059	0.222	0.2095	0.2372	0.2453	0.2444	0.2516	0.2346	0.2847	0.2426	0.2319	0.256	0.2462	0.2596	0.2435	0.2802	0.2453	0.2534	0.2525	0.2328	0.2972	0.2256	0.2363	0.2829	0.248	0.1889	0.1522	0.1674	0.162	0.1862	0.2122	0.2184	0.2337	0.4279
Fungi_Release38	piloderma_croceum_f_1598	C	0.1701	0.2059	0.2059	0.2193	0.2238	0.2229	0.2265	0.2202	0.2265	0.2283	0.2211	0.2292	0.2202	0.2346	0.2158	0.2149	0.2328	0.2149	0.2077	0.2122	0.1952	0.1817	0.1907	0.1817	0.1961	0.2229	0.2086	0.2283	0.1898	0.1934	0.1898	0.1692	0.1898	0.2158	0.1898	0.2355	0.162	0.1603	0.1835	0.1898	0.094	0.0868	0.0824	0.1182	0.1003	0.1459	0.068
Fungi_Release38	piloderma_croceum_f_1598	G	0.2704	0.2426	0.2471	0.2014	0.205	0.2086	0.1835	0.2086	0.1674	0.2023	0.1979	0.1817	0.2086	0.2059	0.1916	0.197	0.2041	0.2032	0.2122	0.1934	0.2372	0.1746	0.2211	0.2175	0.2086	0.2122	0.205	0.2023	0.2104	0.197	0.1961	0.1979	0.1952	0.162	0.1871	0.1943	0.2543	0.2229	0.2865	0.3357	0.5488	0.5739	0.5801	0.4888	0.5479	0.4208	0.4172
Fungi_Release38	piloderma_croceum_f_1598	T	0.3411	0.3662	0.3223	0.3474	0.342	0.3581	0.402	0.3688	0.3805	0.3617	0.3518	0.3671	0.3536	0.3536	0.3706	0.3787	0.3259	0.3366	0.3357	0.3429	0.333	0.359	0.3456	0.3688	0.3393	0.3187	0.3268	0.3259	0.3196	0.3644	0.3608	0.3805	0.3823	0.325	0.3975	0.3339	0.3008	0.3688	0.3411	0.3223	0.1898	0.1773	0.1513	0.1808	0.1334	0.1996	0.0868
Fungi_Release38	trametes_pubescens	A	0.1574	0.1457	0.1682	0.1547	0.1736	0.1565	0.161	0.1547	0.1736	0.1781	0.1727	0.1763	0.1871	0.2005	0.196	0.1655	0.1951	0.1924	0.2167	0.2068	0.2167	0.1942	0.2356	0.1906	0.2023	0.2068	0.2302	0.2311	0.2104	0.2104	0.2266	0.2392	0.2221	0.1951	0.2401	0.2257	0.2275	0.2257	0.2221	0.1268	0.152	0.1142	0.1511	0.1313	0.1664	0.1457	0.3723
Fungi_Release38	trametes_pubescens	C	0.2653	0.2698	0.2608	0.2914	0.2617	0.2977	0.3138	0.3228	0.2869	0.2689	0.2878	0.2761	0.2428	0.2824	0.2473	0.2473	0.2311	0.2572	0.2392	0.2671	0.2239	0.2545	0.1996	0.2464	0.2446	0.2338	0.2266	0.2374	0.2563	0.2329	0.2194	0.2365	0.2482	0.2689	0.2455	0.2581	0.2284	0.2635	0.2248	0.2563	0.1142	0.1457	0.1025	0.1583	0.0953	0.1673	0.0495
Fungi_Release38	trametes_pubescens	G	0.2797	0.268	0.2599	0.2662	0.2428	0.2419	0.1942	0.2149	0.2554	0.2464	0.2527	0.2464	0.2797	0.2257	0.2617	0.2977	0.2905	0.2869	0.2824	0.286	0.2896	0.3282	0.3201	0.304	0.2995	0.295	0.2995	0.2932	0.2824	0.2743	0.2977	0.2437	0.2482	0.2536	0.2392	0.2347	0.2734	0.2878	0.3058	0.3678	0.6016	0.634	0.6403	0.5441	0.6322	0.4424	0.5207
Fungi_Release38	trametes_pubescens	T	0.2977	0.3165	0.3112	0.2878	0.3219	0.304	0.3309	0.3076	0.2842	0.3067	0.2869	0.3013	0.2905	0.2914	0.295	0.2896	0.2833	0.2635	0.2617	0.2401	0.2698	0.223	0.2446	0.259	0.2536	0.2644	0.2437	0.2383	0.2509	0.2824	0.2563	0.2806	0.2815	0.2824	0.2752	0.2815	0.2707	0.223	0.2473	0.2491	0.1322	0.1061	0.1061	0.1664	0.1061	0.2446	0.0576
Fungi_Release38	hypholoma_sublateritium_fd_334_ss_4	A	0.1857	0.1866	0.1967	0.1775	0.2086	0.1921	0.2168	0.1839	0.2104	0.1903	0.1912	0.1949	0.2132	0.172	0.2123	0.2049	0.194	0.2168	0.1967	0.2269	0.1995	0.2214	0.2287	0.2059	0.237	0.2187	0.236	0.2214	0.2278	0.2415	0.2489	0.2342	0.2434	0.2415	0.2177	0.2168	0.2397	0.2662	0.2077	0.1363	0.1784	0.1199	0.1555	0.1848	0.2104	0.1885	0.322
Fungi_Release38	hypholoma_sublateritium_fd_334_ss_4	C	0.2141	0.2543	0.2242	0.2397	0.2452	0.2543	0.237	0.2653	0.2379	0.2452	0.2553	0.269	0.2562	0.279	0.2223	0.2251	0.2296	0.2525	0.2507	0.2351	0.2489	0.2489	0.1967	0.2434	0.204	0.2443	0.2187	0.2406	0.2214	0.2223	0.236	0.2443	0.2086	0.2187	0.2242	0.2196	0.2022	0.1894	0.2168	0.2059	0.1107	0.1208	0.0842	0.1354	0.1016	0.1647	0.0924
Fungi_Release38	hypholoma_sublateritium_fd_334_ss_4	G	0.2763	0.2726	0.247	0.2498	0.2434	0.2425	0.2159	0.2123	0.2251	0.237	0.2296	0.2232	0.2214	0.2232	0.2452	0.2315	0.2461	0.2342	0.2443	0.2498	0.258	0.2635	0.3038	0.2763	0.2662	0.2726	0.2608	0.2425	0.2736	0.2489	0.2315	0.2049	0.2342	0.2187	0.2205	0.2406	0.258	0.2489	0.2864	0.3843	0.5618	0.6322	0.6459	0.5252	0.5672	0.4044	0.5014
Fungi_Release38	hypholoma_sublateritium_fd_334_ss_4	T	0.3239	0.2864	0.3321	0.333	0.3028	0.3111	0.3303	0.3385	0.3266	0.3275	0.3239	0.3129	0.3092	0.3257	0.3202	0.3385	0.3303	0.2964	0.3083	0.2882	0.2937	0.2662	0.2708	0.2745	0.2928	0.2644	0.2845	0.2955	0.2772	0.2873	0.2836	0.3166	0.3138	0.3211	0.3376	0.323	0.3001	0.2955	0.2891	0.2736	0.1491	0.1272	0.1144	0.1546	0.1208	0.2425	0.0842
Fungi_Release38	paxillus_rubicundulus_ve08_2h10	A	0.2251	0.2159	0.2159	0.2662	0.2251	0.2177	0.204	0.2004	0.2086	0.2187	0.2296	0.2177	0.2296	0.2187	0.2123	0.2406	0.2388	0.2489	0.2049	0.2177	0.2242	0.1995	0.2342	0.2351	0.237	0.2617	0.2342	0.2196	0.236	0.2461	0.2498	0.2562	0.269	0.2461	0.2452	0.2278	0.269	0.2983	0.2379	0.1747	0.2132	0.1857	0.1894	0.2049	0.215	0.237	0.4007
Fungi_Release38	paxillus_rubicundulus_ve08_2h10	C	0.1903	0.1793	0.2068	0.2223	0.2406	0.2251	0.2507	0.2452	0.2617	0.2726	0.2461	0.2635	0.2461	0.2406	0.2388	0.2379	0.2296	0.2699	0.2141	0.2187	0.226	0.2379	0.2589	0.2553	0.2223	0.2049	0.2287	0.2443	0.2333	0.2141	0.2662	0.2242	0.2324	0.2086	0.2507	0.2498	0.2049	0.1995	0.1995	0.2004	0.1208	0.0842	0.0842	0.1016	0.0869	0.1263	0.1107
Fungi_Release38	paxillus_rubicundulus_ve08_2h10	G	0.3019	0.2818	0.2818	0.2242	0.2553	0.247	0.2388	0.2425	0.2214	0.1866	0.2177	0.2049	0.2104	0.2242	0.2324	0.226	0.2251	0.1812	0.2406	0.2736	0.2507	0.2507	0.237	0.236	0.2553	0.2644	0.2553	0.237	0.2534	0.2516	0.2077	0.2251	0.1949	0.2562	0.2187	0.2196	0.2516	0.2681	0.3111	0.3651	0.5178	0.5746	0.5892	0.5325	0.5352	0.452	0.3797
Fungi_Release38	paxillus_rubicundulus_ve08_2h10	T	0.2827	0.323	0.2955	0.2873	0.279	0.3102	0.3065	0.312	0.3083	0.322	0.3065	0.3138	0.3138	0.3166	0.3166	0.2955	0.3065	0.3001	0.3403	0.29	0.2992	0.312	0.2699	0.2736	0.2855	0.269	0.2818	0.2992	0.2772	0.2882	0.2763	0.2946	0.3038	0.2891	0.2855	0.3028	0.2745	0.2342	0.2516	0.2598	0.1482	0.1555	0.1372	0.161	0.1629	0.1848	0.1089
Fungi_Release38	rhizoctonia_solani_ag_1_ib	A	0.2307	0.2399	0.2132	0.2114	0.1994	0.2114	0.2188	0.2362	0.2399	0.204	0.2068	0.2316	0.2399	0.2197	0.2298	0.2298	0.2188	0.2509	0.2408	0.2362	0.2371	0.2629	0.2895	0.2537	0.2932	0.2574	0.2463	0.2583	0.2849	0.2904	0.2656	0.2721	0.2886	0.273	0.2417	0.273	0.2748	0.2812	0.2482	0.1452	0.1884	0.1425	0.1415	0.1765	0.2004	0.2684	0.4366
Fungi_Release38	rhizoctonia_solani_ag_1_ib	C	0.1526	0.148	0.1471	0.1949	0.2077	0.2013	0.2307	0.2316	0.2114	0.2482	0.2215	0.2316	0.2298	0.2417	0.2188	0.2206	0.2068	0.205	0.2105	0.193	0.205	0.1958	0.1811	0.1912	0.1801	0.2132	0.1875	0.205	0.1903	0.2004	0.1838	0.1829	0.2059	0.2114	0.2178	0.1857	0.1664	0.2031	0.1939	0.2004	0.0938	0.0956	0.0744	0.1103	0.08	0.1112	0.0938
Fungi_Release38	rhizoctonia_solani_ag_1_ib	G	0.3208	0.2739	0.2849	0.2647	0.2371	0.25	0.2059	0.1958	0.2004	0.1912	0.216	0.1949	0.1994	0.204	0.2381	0.1967	0.2638	0.2279	0.2077	0.2454	0.2261	0.2638	0.2417	0.239	0.2307	0.2463	0.2537	0.2381	0.2261	0.2224	0.216	0.2261	0.2068	0.1838	0.1994	0.2279	0.2463	0.2472	0.25	0.3502	0.5689	0.6232	0.6342	0.5561	0.5735	0.4017	0.3621
Fungi_Release38	rhizoctonia_solani_ag_1_ib	T	0.296	0.3382	0.3548	0.329	0.3557	0.3373	0.3447	0.3364	0.3483	0.3566	0.3557	0.3419	0.3309	0.3346	0.3134	0.3529	0.3107	0.3162	0.341	0.3254	0.3318	0.2776	0.2877	0.3162	0.296	0.2831	0.3125	0.2987	0.2987	0.2868	0.3346	0.3189	0.2987	0.3318	0.341	0.3134	0.3125	0.2684	0.3079	0.3042	0.1489	0.1388	0.1498	0.1572	0.1461	0.2188	0.1075
Fungi_Release38	laetiporus_sulphureus_93_53	A	0.193	0.1835	0.1854	0.1958	0.173	0.1882	0.192	0.2034	0.1863	0.1968	0.1977	0.1939	0.2177	0.2015	0.2196	0.2338	0.23	0.2177	0.1863	0.2281	0.2139	0.2281	0.2177	0.2424	0.2357	0.2357	0.2291	0.2329	0.2196	0.2567	0.2139	0.2329	0.2272	0.2376	0.2357	0.2424	0.2624	0.2652	0.193	0.174	0.1759	0.1464	0.1806	0.1977	0.1882	0.193	0.3165
Fungi_Release38	laetiporus_sulphureus_93_53	C	0.2386	0.2224	0.231	0.2243	0.2567	0.2529	0.2757	0.2738	0.2567	0.2757	0.2586	0.2595	0.2367	0.2557	0.25	0.2395	0.2357	0.2424	0.2376	0.2367	0.2272	0.211	0.2281	0.2224	0.2291	0.2291	0.2452	0.231	0.2167	0.2243	0.2177	0.23	0.2186	0.2348	0.2234	0.2025	0.2063	0.1987	0.2405	0.1778	0.115	0.1008	0.1017	0.1625	0.0894	0.1416	0.0922
Fungi_Release38	laetiporus_sulphureus_93_53	G	0.2842	0.2766	0.269	0.2595	0.2548	0.2452	0.2395	0.2224	0.231	0.2101	0.2196	0.25	0.2443	0.2338	0.2386	0.212	0.2443	0.2747	0.2624	0.2785	0.2709	0.2766	0.2814	0.2785	0.2624	0.2595	0.2424	0.2567	0.2548	0.2405	0.2548	0.2272	0.2576	0.2433	0.2262	0.2405	0.2557	0.2833	0.3108	0.3783	0.5656	0.6131	0.6093	0.4629	0.6036	0.4753	0.4962
Fungi_Release38	laetiporus_sulphureus_93_53	T	0.2842	0.3175	0.3146	0.3203	0.3156	0.3137	0.2928	0.3004	0.326	0.3175	0.3241	0.2966	0.3013	0.3089	0.2918	0.3146	0.2899	0.2652	0.3137	0.2567	0.288	0.2842	0.2728	0.2567	0.2728	0.2757	0.2833	0.2795	0.3089	0.2785	0.3137	0.3099	0.2966	0.2842	0.3146	0.3146	0.2757	0.2529	0.2557	0.27	0.1435	0.1397	0.1084	0.1768	0.1188	0.1901	0.0951
Fungi_Release38	coprinopsis_cinerea_okayama7_130	A	0.2034	0.1977	0.1834	0.1767	0.1882	0.1738	0.1843	0.2082	0.1987	0.1691	0.1891	0.1882	0.1843	0.1872	0.1929	0.1882	0.2235	0.213	0.2216	0.2178	0.234	0.2436	0.2292	0.2407	0.2579	0.235	0.2407	0.212	0.2206	0.2149	0.255	0.2359	0.2359	0.2273	0.2397	0.2292	0.2722	0.2646	0.2283	0.1328	0.17	0.1385	0.1652	0.2073	0.2292	0.2111	0.447
Fungi_Release38	coprinopsis_cinerea_okayama7_130	C	0.1996	0.2216	0.2292	0.2197	0.2483	0.2579	0.2856	0.2302	0.2531	0.276	0.2665	0.2722	0.2579	0.2464	0.2302	0.2569	0.2388	0.2063	0.2378	0.2178	0.2178	0.2149	0.2321	0.2111	0.2006	0.2321	0.212	0.2245	0.234	0.233	0.192	0.213	0.2206	0.2264	0.2321	0.2369	0.2063	0.1958	0.2197	0.2053	0.1003	0.0735	0.0774	0.0993	0.0936	0.1289	0.0869
Fungi_Release38	coprinopsis_cinerea_okayama7_130	G	0.2818	0.2674	0.2818	0.233	0.2245	0.2321	0.2111	0.212	0.191	0.1929	0.1968	0.2168	0.2073	0.2273	0.2512	0.2225	0.2245	0.2607	0.2254	0.2216	0.2703	0.2569	0.2388	0.2455	0.2521	0.2617	0.2617	0.2292	0.2245	0.2378	0.2254	0.2283	0.2111	0.2063	0.2225	0.2235	0.2168	0.2607	0.2722	0.3515	0.575	0.659	0.6304	0.5129	0.5224	0.3849	0.3744
Fungi_Release38	coprinopsis_cinerea_okayama7_130	T	0.3152	0.3133	0.3056	0.3706	0.3391	0.3362	0.319	0.3496	0.3572	0.362	0.3477	0.3228	0.3505	0.3391	0.3257	0.3324	0.3133	0.32	0.3152	0.3429	0.2779	0.2846	0.2999	0.3028	0.2894	0.2713	0.2856	0.3343	0.3209	0.3142	0.3276	0.3228	0.3324	0.34	0.3056	0.3104	0.3047	0.2789	0.2798	0.3104	0.1547	0.1289	0.127	0.1805	0.1547	0.2751	0.0917
Fungi_Release38	melampsora_laricipopulina	A	0.28	0.2617	0.2915	0.2742	0.2761	0.2752	0.2828	0.2761	0.2637	0.3001	0.2943	0.2665	0.2905	0.2886	0.2771	0.2809	0.2752	0.2512	0.2387	0.2608	0.2579	0.2637	0.2291	0.2531	0.2272	0.2186	0.2061	0.2128	0.2244	0.2042	0.1831	0.1889	0.1774	0.1726	0.1668	0.1592	0.1429	0.1409	0.1438	0.1093	0.1563	0.1659	0.1793	0.256	0.2895	0.3384	0.4621
Fungi_Release38	melampsora_laricipopulina	C	0.1898	0.1841	0.1611	0.2081	0.1774	0.162	0.1965	0.1783	0.2071	0.1697	0.1822	0.1879	0.1735	0.1927	0.1802	0.1707	0.162	0.1726	0.1841	0.1649	0.1831	0.1716	0.1774	0.1515	0.186	0.1678	0.1716	0.1496	0.162	0.1707	0.1668	0.1755	0.1726	0.1544	0.1486	0.1572	0.1419	0.116	0.1074	0.1189	0.069	0.0614	0.0594	0.0738	0.0748	0.0748	0.069
Fungi_Release38	melampsora_laricipopulina	G	0.1841	0.1783	0.1755	0.1927	0.1889	0.1831	0.1755	0.1697	0.1985	0.164	0.1726	0.1927	0.1735	0.1678	0.1716	0.1879	0.1918	0.1812	0.1937	0.2033	0.1783	0.1726	0.1802	0.2013	0.185	0.1908	0.1975	0.187	0.1927	0.1956	0.1946	0.2148	0.1956	0.21	0.2215	0.2646	0.3011	0.3394	0.3586	0.4525	0.6059	0.6385	0.5944	0.5043	0.466	0.3279	0.2733
Fungi_Release38	melampsora_laricipopulina	T	0.3461	0.3758	0.372	0.325	0.3576	0.3797	0.3452	0.3758	0.3308	0.3663	0.3509	0.3528	0.3624	0.3509	0.371	0.3605	0.371	0.395	0.3835	0.371	0.3806	0.3921	0.4132	0.3941	0.4017	0.4228	0.4247	0.4506	0.4209	0.4295	0.4554	0.4209	0.4545	0.4631	0.4631	0.419	0.4142	0.4036	0.3902	0.3193	0.1687	0.1342	0.1668	0.1659	0.1697	0.2589	0.1956
Fungi_Release38	pleurotus_ostreatus_pc15	A	0.2437	0.1927	0.1609	0.2245	0.1985	0.2168	0.2148	0.2216	0.2148	0.2158	0.2254	0.2177	0.2216	0.2023	0.236	0.2139	0.1927	0.2187	0.2071	0.2274	0.2341	0.2274	0.2466	0.2322	0.2274	0.2351	0.2148	0.2312	0.2582	0.237	0.2437	0.2476	0.2264	0.2592	0.2852	0.2505	0.2784	0.2958	0.2447	0.1811	0.1821	0.1551	0.1985	0.2052	0.2139	0.2139	0.3256
Fungi_Release38	pleurotus_ostreatus_pc15	C	0.2013	0.2023	0.2322	0.2216	0.2341	0.2476	0.2505	0.2553	0.2486	0.2697	0.2611	0.2592	0.2746	0.2659	0.2331	0.2659	0.262	0.2582	0.2524	0.2399	0.2274	0.2466	0.2389	0.2408	0.2351	0.2524	0.2447	0.2601	0.236	0.2216	0.2264	0.2331	0.2476	0.2245	0.2139	0.2225	0.2158	0.2293	0.2274	0.2187	0.1146	0.104	0.0723	0.106	0.0925	0.1368	0.1146
Fungi_Release38	pleurotus_ostreatus_pc15	G	0.289	0.315	0.2987	0.2428	0.2447	0.238	0.2235	0.2081	0.2216	0.2004	0.1879	0.1994	0.1936	0.2245	0.1985	0.2129	0.2399	0.2216	0.2322	0.2331	0.236	0.2428	0.2303	0.2437	0.2669	0.2216	0.2168	0.2428	0.2168	0.2389	0.2428	0.2197	0.2206	0.1975	0.1879	0.2129	0.2254	0.2322	0.2649	0.343	0.5578	0.6021	0.6224	0.5125	0.5732	0.4239	0.4586
Fungi_Release38	pleurotus_ostreatus_pc15	T	0.2659	0.29	0.3083	0.3112	0.3227	0.2977	0.3112	0.315	0.315	0.3141	0.3256	0.3237	0.3102	0.3073	0.3324	0.3073	0.3054	0.3015	0.3083	0.2996	0.3025	0.2832	0.2842	0.2832	0.2707	0.2909	0.3237	0.2659	0.289	0.3025	0.2871	0.2996	0.3054	0.3189	0.3131	0.3141	0.2803	0.2428	0.263	0.2572	0.1455	0.1387	0.1069	0.1763	0.1204	0.2254	0.1012
Fungi_Release38	gelatoporia_subvermispora_b	A	0.2248	0.2248	0.1851	0.1986	0.1928	0.2122	0.2112	0.1812	0.2384	0.188	0.2064	0.1899	0.1928	0.2083	0.2161	0.2171	0.2209	0.2093	0.1909	0.2355	0.2326	0.2209	0.2209	0.2481	0.2229	0.2384	0.2209	0.2248	0.2316	0.249	0.249	0.2229	0.2306	0.2393	0.2578	0.2364	0.2452	0.2771	0.2684	0.1541	0.1938	0.1492	0.1541	0.1638	0.2122	0.155	0.3905
Fungi_Release38	gelatoporia_subvermispora_b	C	0.1899	0.2219	0.251	0.2229	0.251	0.2471	0.2665	0.2878	0.2393	0.2868	0.2752	0.2781	0.2597	0.2665	0.2684	0.2558	0.2461	0.2665	0.2723	0.2297	0.2461	0.2151	0.251	0.22	0.2306	0.2422	0.2267	0.25	0.2229	0.2422	0.2432	0.2219	0.2713	0.2413	0.2539	0.281	0.2209	0.2083	0.2326	0.2645	0.1231	0.1143	0.1095	0.1347	0.1056	0.1754	0.0766
Fungi_Release38	gelatoporia_subvermispora_b	G	0.3198	0.2723	0.2762	0.2645	0.2655	0.2112	0.2364	0.2112	0.2393	0.2074	0.2074	0.2171	0.2607	0.2171	0.2403	0.2112	0.2452	0.2364	0.2655	0.2616	0.251	0.2762	0.2587	0.282	0.2859	0.2655	0.2597	0.2655	0.2742	0.2442	0.2267	0.2393	0.2112	0.2316	0.2151	0.2035	0.2384	0.2917	0.2607	0.3605	0.5446	0.6076	0.595	0.5233	0.5785	0.4641	0.4777
Fungi_Release38	gelatoporia_subvermispora_b	T	0.2655	0.281	0.2878	0.314	0.2907	0.3295	0.2859	0.3198	0.2829	0.3178	0.311	0.3149	0.2868	0.3081	0.2752	0.3159	0.2878	0.2878	0.2713	0.2733	0.2703	0.2878	0.2694	0.25	0.2607	0.2539	0.2926	0.2597	0.2713	0.2645	0.281	0.3159	0.2868	0.2878	0.2733	0.2791	0.2955	0.2229	0.2384	0.2209	0.1386	0.1289	0.1415	0.1783	0.1037	0.2054	0.0552
Fungi_Release38	puccinia_striiformis_f_sp_tritici_pst_78	A	0.2741	0.2722	0.2761	0.2859	0.28	0.2741	0.3112	0.2751	0.3073	0.3073	0.2878	0.2624	0.2907	0.2966	0.2741	0.2673	0.2976	0.2546	0.2624	0.2468	0.2624	0.2615	0.2605	0.2244	0.2585	0.241	0.2322	0.2361	0.201	0.2117	0.1941	0.2029	0.2078	0.2049	0.1746	0.1561	0.1424	0.1337	0.1239	0.0937	0.159	0.1776	0.2215	0.2898	0.3288	0.3541	0.5639
Fungi_Release38	puccinia_striiformis_f_sp_tritici_pst_78	C	0.202	0.2537	0.2107	0.2205	0.202	0.2351	0.2049	0.2263	0.2078	0.202	0.2244	0.2098	0.198	0.1961	0.1922	0.2029	0.1883	0.1941	0.2107	0.1951	0.1941	0.1824	0.1824	0.2254	0.1717	0.1824	0.1902	0.162	0.1902	0.1941	0.1756	0.1834	0.1815	0.158	0.1834	0.1698	0.16	0.1541	0.1454	0.118	0.0673	0.0585	0.0741	0.0693	0.0771	0.1141	0.0634
Fungi_Release38	puccinia_striiformis_f_sp_tritici_pst_78	G	0.1795	0.1561	0.1883	0.1727	0.2029	0.1824	0.1571	0.1844	0.1717	0.1668	0.1766	0.1737	0.1815	0.1746	0.1756	0.1698	0.1756	0.1824	0.1873	0.1951	0.1971	0.1893	0.1659	0.1873	0.1737	0.1815	0.1698	0.158	0.1551	0.1473	0.1746	0.1766	0.1776	0.199	0.2068	0.2361	0.2985	0.3366	0.3698	0.4566	0.6127	0.5922	0.561	0.4507	0.4459	0.3259	0.2566
Fungi_Release38	puccinia_striiformis_f_sp_tritici_pst_78	T	0.3444	0.318	0.3249	0.321	0.3151	0.3083	0.3268	0.3141	0.3132	0.3239	0.3112	0.3541	0.3298	0.3327	0.358	0.36	0.3385	0.3688	0.3395	0.3629	0.3463	0.3668	0.3912	0.3629	0.3961	0.3951	0.4078	0.4439	0.4537	0.4468	0.4556	0.4371	0.4332	0.438	0.4351	0.438	0.399	0.3756	0.361	0.3317	0.161	0.1717	0.1434	0.1902	0.1483	0.2059	0.1161
Fungi_Release38	cryptococcus_neoformans_var_grubii_h99	A	0.2124	0.2255	0.2325	0.2234	0.2104	0.2234	0.2305	0.2315	0.2345	0.2375	0.2285	0.2505	0.2365	0.2645	0.2545	0.2575	0.2705	0.2665	0.2565	0.2525	0.2846	0.2936	0.3096	0.3036	0.2936	0.2826	0.3046	0.2776	0.2806	0.3106	0.3036	0.2946	0.2745	0.2445	0.2485	0.2565	0.2655	0.3086	0.2695	0.2094	0.2224	0.2064	0.2054	0.2325	0.2545	0.3226	0.4569
Fungi_Release38	cryptococcus_neoformans_var_grubii_h99	C	0.1904	0.2014	0.1874	0.1924	0.2024	0.2184	0.2024	0.2094	0.2144	0.2064	0.2164	0.1754	0.1964	0.2194	0.1994	0.1824	0.1764	0.2144	0.1894	0.1764	0.1733	0.1834	0.1623	0.1583	0.1603	0.1784	0.1934	0.1924	0.1964	0.2124	0.1774	0.1904	0.1954	0.2094	0.2265	0.2024	0.1723	0.1583	0.1764	0.1603	0.0872	0.0792	0.0641	0.0812	0.0762	0.1012	0.0681
Fungi_Release38	cryptococcus_neoformans_var_grubii_h99	G	0.2545	0.2625	0.2385	0.2325	0.2255	0.2154	0.2024	0.1994	0.1743	0.2004	0.2074	0.2154	0.2134	0.2004	0.2114	0.2064	0.2535	0.2285	0.2214	0.2595	0.2445	0.2415	0.2435	0.2715	0.2846	0.2655	0.2204	0.2575	0.2405	0.2154	0.2515	0.2555	0.2375	0.2565	0.2295	0.2204	0.2665	0.2675	0.2956	0.3557	0.518	0.5772	0.6022	0.522	0.517	0.3697	0.3677
Fungi_Release38	cryptococcus_neoformans_var_grubii_h99	T	0.3427	0.3106	0.3417	0.3517	0.3617	0.3427	0.3647	0.3597	0.3768	0.3557	0.3477	0.3587	0.3537	0.3156	0.3347	0.3537	0.2996	0.2906	0.3327	0.3116	0.2976	0.2816	0.2846	0.2665	0.2615	0.2735	0.2816	0.2725	0.2826	0.2615	0.2675	0.2595	0.2926	0.2896	0.2956	0.3206	0.2956	0.2655	0.2585	0.2745	0.1723	0.1373	0.1283	0.1643	0.1523	0.2064	0.1072
Fungi_Release38	kwoniella_mangroviensis_cbs_10435	A	0.25	0.2369	0.2692	0.2843	0.2681	0.2762	0.2692	0.246	0.3165	0.2752	0.2812	0.2873	0.2964	0.2903	0.2722	0.2802	0.2883	0.2782	0.3216	0.2913	0.3065	0.2772	0.2833	0.2702	0.2621	0.2732	0.2944	0.2752	0.246	0.2641	0.248	0.244	0.2389	0.2631	0.2218	0.2248	0.2319	0.2107	0.2026	0.1452	0.1603	0.1683	0.1935	0.244	0.3155	0.2742	0.5635
Fungi_Release38	kwoniella_mangroviensis_cbs_10435	C	0.2429	0.2359	0.2218	0.2167	0.2339	0.2268	0.2077	0.2349	0.2046	0.2127	0.2077	0.2157	0.2117	0.1885	0.1804	0.1966	0.1825	0.1794	0.1512	0.1905	0.1583	0.1774	0.1815	0.2127	0.1855	0.1754	0.1895	0.1956	0.1845	0.1794	0.1925	0.1704	0.1845	0.1724	0.1653	0.1442	0.1502	0.1472	0.1089	0.1371	0.0645	0.0544	0.0454	0.0575	0.0645	0.0817	0.0312
Fungi_Release38	kwoniella_mangroviensis_cbs_10435	G	0.1673	0.2036	0.2167	0.1925	0.1835	0.2107	0.1935	0.2036	0.2329	0.2087	0.2258	0.2349	0.2258	0.2399	0.255	0.2409	0.2641	0.2752	0.256	0.2379	0.2692	0.25	0.2429	0.251	0.2399	0.2692	0.2339	0.1935	0.254	0.2298	0.2419	0.2429	0.2258	0.1996	0.2258	0.2762	0.2692	0.2883	0.3024	0.38	0.6099	0.62	0.5696	0.5111	0.4496	0.3558	0.3085
Fungi_Release38	kwoniella_mangroviensis_cbs_10435	T	0.3397	0.3236	0.2923	0.3065	0.3145	0.2863	0.3296	0.3155	0.246	0.3034	0.2853	0.2621	0.2661	0.2812	0.2923	0.2823	0.2651	0.2671	0.2712	0.2802	0.2661	0.2954	0.2923	0.2661	0.3125	0.2823	0.2823	0.3357	0.3155	0.3266	0.3175	0.3427	0.3508	0.3649	0.3871	0.3548	0.3488	0.3538	0.3861	0.3377	0.1653	0.1573	0.1915	0.1875	0.1704	0.2883	0.0968
Fungi_Release38	sphaerobolus_stellatus_ss14	A	0.216	0.2572	0.2377	0.2798	0.2737	0.2407	0.2469	0.2665	0.2202	0.2747	0.2222	0.2582	0.2891	0.25	0.284	0.2737	0.2922	0.2706	0.215	0.2253	0.2737	0.2521	0.25	0.2706	0.2459	0.3045	0.2459	0.286	0.3076	0.2922	0.2757	0.2963	0.2675	0.2778	0.2716	0.2901	0.2572	0.3097	0.2459	0.1903	0.2335	0.1821	0.1986	0.2078	0.2377	0.2695	0.4095
Fungi_Release38	sphaerobolus_stellatus_ss14	C	0.1626	0.1728	0.1811	0.179	0.1852	0.1842	0.2366	0.1934	0.2284	0.214	0.216	0.1893	0.1986	0.215	0.1914	0.1996	0.1955	0.1862	0.2181	0.2006	0.2191	0.2078	0.1626	0.2078	0.2191	0.1924	0.2037	0.1996	0.1636	0.1626	0.1934	0.1903	0.1914	0.2181	0.2027	0.1893	0.1975	0.1852	0.1955	0.1687	0.1091	0.0648	0.0772	0.0957	0.0638	0.0988	0.0802
Fungi_Release38	sphaerobolus_stellatus_ss14	G	0.3035	0.2593	0.2675	0.2222	0.2099	0.2171	0.1821	0.1903	0.1811	0.1996	0.1893	0.2088	0.178	0.1944	0.1975	0.1821	0.2099	0.1862	0.2068	0.2356	0.1965	0.2346	0.2469	0.2305	0.215	0.2006	0.251	0.2037	0.2366	0.2325	0.2284	0.177	0.1975	0.1605	0.1677	0.1924	0.1944	0.2335	0.2366	0.3313	0.4815	0.572	0.5885	0.5309	0.5226	0.428	0.3735
Fungi_Release38	sphaerobolus_stellatus_ss14	T	0.3179	0.3107	0.3138	0.3189	0.3313	0.358	0.3344	0.3498	0.3704	0.3117	0.3724	0.3436	0.3344	0.3405	0.3272	0.3447	0.3025	0.357	0.3601	0.3385	0.3107	0.3056	0.3405	0.2912	0.32	0.3025	0.2994	0.3107	0.2922	0.3128	0.3025	0.3364	0.3436	0.3436	0.358	0.3282	0.3508	0.2716	0.322	0.3097	0.1759	0.1811	0.1358	0.1656	0.1759	0.2037	0.1368
Fungi_Release38	trametes_cinnabarina	A	0.16	0.1837	0.1744	0.2064	0.1837	0.1837	0.1579	0.1992	0.193	0.1713	0.1806	0.2064	0.1868	0.1713	0.194	0.1981	0.1971	0.2043	0.1858	0.1961	0.1981	0.1858	0.2208	0.2023	0.2043	0.2105	0.2157	0.1899	0.2147	0.2085	0.2105	0.1992	0.2167	0.2157	0.2322	0.225	0.2497	0.2394	0.2054	0.1496	0.1816	0.1207	0.1692	0.1754	0.2219	0.1486	0.3467
Fungi_Release38	trametes_cinnabarina	C	0.2425	0.2394	0.2745	0.259	0.2735	0.2993	0.29	0.2941	0.291	0.2931	0.3199	0.2714	0.289	0.2611	0.2621	0.2745	0.2962	0.2508	0.2745	0.2456	0.2539	0.2766	0.2456	0.2714	0.2374	0.2508	0.2828	0.2951	0.2477	0.2652	0.2528	0.2745	0.2704	0.2776	0.2724	0.2724	0.2497	0.2621	0.258	0.2446	0.1228	0.1146	0.0991	0.1527	0.1104	0.1878	0.0826
Fungi_Release38	trametes_cinnabarina	G	0.322	0.2683	0.2673	0.259	0.2652	0.2239	0.2456	0.2291	0.2208	0.257	0.2301	0.2497	0.2528	0.3179	0.2693	0.259	0.2508	0.2611	0.2632	0.2663	0.2776	0.2797	0.3024	0.2611	0.2921	0.2766	0.2786	0.2652	0.2559	0.2487	0.2755	0.2673	0.2466	0.2229	0.259	0.2415	0.2642	0.2745	0.2962	0.3612	0.5676	0.6099	0.6151	0.5222	0.5655	0.4396	0.5108
Fungi_Release38	trametes_cinnabarina	T	0.2755	0.3086	0.2838	0.2755	0.2776	0.2931	0.3065	0.2776	0.2951	0.2786	0.2693	0.2724	0.2714	0.2497	0.2745	0.2683	0.2559	0.2838	0.2766	0.2921	0.2704	0.258	0.2312	0.2652	0.2663	0.2621	0.2229	0.2497	0.2817	0.2776	0.2611	0.259	0.2663	0.2838	0.2363	0.2611	0.2363	0.2239	0.2405	0.2446	0.128	0.1548	0.1166	0.1496	0.1022	0.2239	0.0599
Fungi_Release38	kwoniella_mangroviensis_cbs_8507	A	0.2428	0.2376	0.2614	0.2872	0.2727	0.2862	0.2851	0.251	0.3171	0.2789	0.2727	0.2944	0.2955	0.2903	0.2696	0.2975	0.281	0.2727	0.3223	0.2955	0.3068	0.2903	0.2851	0.2738	0.2676	0.2769	0.2934	0.2707	0.2531	0.2707	0.2469	0.2366	0.2397	0.2552	0.2149	0.218	0.2252	0.2025	0.2035	0.1415	0.1591	0.1694	0.1942	0.2355	0.3151	0.2758	0.5682
Fungi_Release38	kwoniella_mangroviensis_cbs_8507	C	0.2531	0.2242	0.2252	0.2138	0.2417	0.2273	0.2045	0.2428	0.2045	0.2211	0.2138	0.2211	0.2066	0.1963	0.186	0.1942	0.1818	0.1818	0.1519	0.1942	0.1622	0.1777	0.1756	0.2169	0.188	0.1715	0.189	0.1963	0.1798	0.1829	0.1921	0.1705	0.1808	0.1715	0.1663	0.1426	0.1384	0.1384	0.1209	0.1333	0.0589	0.0548	0.0465	0.061	0.063	0.0857	0.0289
Fungi_Release38	kwoniella_mangroviensis_cbs_8507	G	0.1622	0.2107	0.2118	0.189	0.1798	0.2045	0.1921	0.2014	0.2273	0.1952	0.2252	0.2376	0.2242	0.2386	0.2603	0.2293	0.2696	0.2789	0.2572	0.2293	0.2624	0.251	0.2428	0.2366	0.2407	0.2665	0.2293	0.2056	0.251	0.22	0.2386	0.2428	0.2231	0.2004	0.2283	0.2748	0.2789	0.2965	0.2893	0.3822	0.6136	0.625	0.5733	0.501	0.4473	0.3512	0.3048
Fungi_Release38	kwoniella_mangroviensis_cbs_8507	T	0.3419	0.3275	0.3017	0.3099	0.3058	0.282	0.3182	0.3048	0.251	0.3048	0.2882	0.2469	0.2738	0.2748	0.2841	0.2789	0.2676	0.2665	0.2686	0.281	0.2686	0.281	0.2965	0.2727	0.3037	0.2851	0.2882	0.3275	0.3161	0.3264	0.3223	0.3502	0.3564	0.3729	0.3905	0.3647	0.3574	0.3626	0.3864	0.343	0.1684	0.1508	0.186	0.2025	0.1746	0.2872	0.0981
Fungi_Release38	gonapodya_prolifera_jel478	A	0.2228	0.2062	0.2021	0.2062	0.2073	0.2155	0.2021	0.2197	0.2176	0.2342	0.2145	0.2062	0.2311	0.2155	0.2073	0.2228	0.2269	0.2259	0.2383	0.2352	0.228	0.2135	0.2218	0.2197	0.2373	0.2404	0.2073	0.2052	0.229	0.228	0.2342	0.2269	0.2155	0.2166	0.1917	0.1938	0.1762	0.1865	0.1513	0.1233	0.1378	0.1523	0.1523	0.1782	0.2104	0.2632	0.4197
Fungi_Release38	gonapodya_prolifera_jel478	C	0.2259	0.2228	0.2135	0.2145	0.2415	0.2238	0.2259	0.2259	0.2114	0.2446	0.2342	0.2435	0.2155	0.2508	0.2373	0.2518	0.2342	0.2301	0.2466	0.2466	0.2238	0.2674	0.2497	0.2508	0.2259	0.2394	0.2269	0.2477	0.2466	0.256	0.2601	0.2497	0.2487	0.2715	0.2497	0.2249	0.2466	0.2466	0.1865	0.2238	0.1275	0.1026	0.1016	0.1337	0.1202	0.1202	0.1047
Fungi_Release38	gonapodya_prolifera_jel478	G	0.2736	0.2622	0.2953	0.2767	0.2736	0.2518	0.2725	0.2466	0.2788	0.2549	0.2756	0.2736	0.2591	0.2539	0.256	0.228	0.2435	0.2674	0.2342	0.2528	0.2363	0.2301	0.2404	0.2404	0.2435	0.2332	0.2456	0.2187	0.2124	0.2249	0.2145	0.1896	0.2238	0.1979	0.228	0.2611	0.2632	0.2549	0.3078	0.3575	0.5358	0.5938	0.5917	0.5192	0.5492	0.4415	0.4041
Fungi_Release38	gonapodya_prolifera_jel478	T	0.2777	0.3088	0.2891	0.3026	0.2777	0.3088	0.2995	0.3078	0.2922	0.2663	0.2756	0.2767	0.2943	0.2798	0.2995	0.2974	0.2953	0.2767	0.2808	0.2653	0.3119	0.2891	0.2881	0.2891	0.2933	0.287	0.3202	0.3285	0.3119	0.2912	0.2912	0.3337	0.3119	0.314	0.3306	0.3202	0.314	0.3119	0.3544	0.2953	0.199	0.1513	0.1544	0.1689	0.1202	0.1751	0.0715
Fungi_Release38	kwoniella_mangroviensis_cbs_8886	A	0.2435	0.2446	0.2663	0.2819	0.2715	0.2798	0.2829	0.2487	0.3098	0.2777	0.2777	0.2798	0.2964	0.2891	0.2694	0.2798	0.2902	0.2808	0.3285	0.2953	0.3016	0.2777	0.2881	0.2756	0.2622	0.2767	0.2953	0.2736	0.2435	0.2622	0.2528	0.2456	0.2383	0.2528	0.2114	0.2218	0.2311	0.2093	0.2062	0.1461	0.1596	0.1689	0.1845	0.2332	0.3098	0.2694	0.5648
Fungi_Release38	kwoniella_mangroviensis_cbs_8886	C	0.2487	0.2228	0.2249	0.2155	0.2352	0.2269	0.2	0.2383	0.2052	0.2218	0.2104	0.2197	0.2052	0.1959	0.1855	0.1959	0.1762	0.1793	0.1482	0.1907	0.1606	0.1803	0.1731	0.2052	0.1917	0.1772	0.1896	0.1969	0.1896	0.1845	0.1886	0.1689	0.1886	0.1679	0.1648	0.143	0.1409	0.144	0.113	0.1358	0.0642	0.056	0.0425	0.057	0.057	0.085	0.0332
Fungi_Release38	kwoniella_mangroviensis_cbs_8886	G	0.1679	0.2021	0.2187	0.1917	0.1813	0.2021	0.1876	0.201	0.2373	0.199	0.229	0.2456	0.2238	0.2415	0.2518	0.2373	0.2591	0.2725	0.257	0.2352	0.2674	0.2477	0.2415	0.2435	0.2404	0.2663	0.2249	0.2041	0.2466	0.2249	0.2425	0.2394	0.2166	0.2	0.2373	0.2715	0.2725	0.2964	0.2933	0.3793	0.6021	0.6187	0.5845	0.5098	0.456	0.3554	0.3098
Fungi_Release38	kwoniella_mangroviensis_cbs_8886	T	0.3399	0.3306	0.2902	0.3109	0.3119	0.2912	0.3295	0.3119	0.2477	0.3016	0.2829	0.2549	0.2746	0.2736	0.2933	0.287	0.2746	0.2674	0.2663	0.2788	0.2705	0.2943	0.2974	0.2756	0.3057	0.2798	0.2902	0.3254	0.3202	0.3285	0.3161	0.3461	0.3565	0.3793	0.3865	0.3637	0.3554	0.3503	0.3876	0.3389	0.1741	0.1565	0.1886	0.2	0.1772	0.2902	0.0922
Fungi_Release38	rhodotorula_toruloides	A	0.0958	0.0938	0.0938	0.099	0.1073	0.1104	0.0969	0.1146	0.1125	0.1344	0.1375	0.1635	0.1448	0.1573	0.1635	0.1823	0.1719	0.1917	0.2271	0.1865	0.2094	0.2094	0.2219	0.2	0.2094	0.2042	0.1948	0.1875	0.1875	0.1906	0.2125	0.2198	0.224	0.2021	0.199	0.1719	0.1354	0.1156	0.1385	0.1229	0.1167	0.1188	0.151	0.1594	0.2021	0.2396	0.4167
Fungi_Release38	rhodotorula_toruloides	C	0.4021	0.3781	0.4344	0.4354	0.4094	0.3917	0.3969	0.4167	0.374	0.3562	0.3333	0.3562	0.3552	0.3146	0.2979	0.2948	0.2823	0.2906	0.2542	0.2719	0.2531	0.2719	0.224	0.2562	0.2479	0.2292	0.2521	0.2708	0.2583	0.2344	0.2438	0.2271	0.2156	0.2104	0.2042	0.224	0.1865	0.1896	0.1875	0.1885	0.1021	0.1167	0.099	0.2062	0.0781	0.2375	0.0354
Fungi_Release38	rhodotorula_toruloides	G	0.1958	0.2094	0.1865	0.1906	0.1865	0.1781	0.2073	0.1885	0.1979	0.2135	0.2271	0.2188	0.2479	0.2729	0.2906	0.301	0.3094	0.3042	0.3031	0.3396	0.3354	0.3385	0.3646	0.3469	0.3052	0.3333	0.3438	0.3104	0.3323	0.3438	0.3177	0.3198	0.325	0.3448	0.3302	0.3656	0.4073	0.3917	0.4125	0.4469	0.674	0.6531	0.6604	0.4688	0.6562	0.3958	0.5344
Fungi_Release38	rhodotorula_toruloides	T	0.3063	0.3187	0.2854	0.275	0.2969	0.3198	0.299	0.2802	0.3156	0.2958	0.3021	0.2615	0.2521	0.2552	0.2479	0.2219	0.2365	0.2135	0.2156	0.2021	0.2021	0.1802	0.1896	0.1969	0.2375	0.2333	0.2094	0.2312	0.2219	0.2312	0.226	0.2333	0.2354	0.2427	0.2667	0.2385	0.2708	0.3031	0.2615	0.2417	0.1073	0.1115	0.0896	0.1656	0.0635	0.1271	0.0135
Fungi_Release38	allomyces_macrogynus_atcc_38327	A	0.1555	0.1576	0.1514	0.1816	0.1868	0.1294	0.1712	0.1827	0.1983	0.1681	0.1555	0.1848	0.1816	0.1973	0.2004	0.167	0.1816	0.1942	0.2109	0.1785	0.1983	0.1973	0.2077	0.2244	0.2129	0.1848	0.1962	0.2088	0.19	0.1921	0.1942	0.1848	0.1618	0.1879	0.1315	0.1493	0.1388	0.1232	0.1127	0.0981	0.118	0.1263	0.1722	0.1827	0.1712	0.2098	0.2871
Fungi_Release38	allomyces_macrogynus_atcc_38327	C	0.2933	0.2912	0.286	0.2589	0.2526	0.2745	0.2599	0.2589	0.2589	0.2432	0.2495	0.2599	0.2526	0.2432	0.2349	0.2547	0.2568	0.2286	0.2484	0.2547	0.285	0.2537	0.2568	0.2787	0.3006	0.2589	0.2839	0.2808	0.3121	0.262	0.2902	0.2777	0.2599	0.2777	0.2818	0.2244	0.2203	0.2203	0.2349	0.2516	0.1451	0.1305	0.1086	0.1628	0.0908	0.1221	0.1033
Fungi_Release38	allomyces_macrogynus_atcc_38327	G	0.3309	0.3163	0.3403	0.3392	0.3299	0.3643	0.3434	0.3486	0.31	0.3622	0.3695	0.3653	0.3685	0.3518	0.3591	0.3601	0.3601	0.3852	0.3319	0.358	0.333	0.3424	0.3299	0.2923	0.2944	0.3017	0.2871	0.286	0.2818	0.286	0.2985	0.2818	0.3299	0.3038	0.309	0.3685	0.3873	0.3956	0.3737	0.4332	0.6211	0.6326	0.6002	0.4749	0.6305	0.4489	0.5511
Fungi_Release38	allomyces_macrogynus_atcc_38327	T	0.2203	0.2349	0.2223	0.2203	0.2307	0.2317	0.2255	0.2098	0.2328	0.2265	0.2255	0.19	0.1973	0.2077	0.2056	0.2182	0.2015	0.1921	0.2088	0.2088	0.1837	0.2067	0.2056	0.2046	0.1921	0.2547	0.2328	0.2244	0.2161	0.2599	0.2171	0.2557	0.2484	0.2307	0.2777	0.2578	0.2537	0.261	0.2787	0.2171	0.1159	0.1106	0.119	0.1795	0.1075	0.2192	0.0585
Fungi_Release38	sporidiobolus_salmonicolor	A	0.1054	0.1001	0.1317	0.1138	0.1096	0.1538	0.1307	0.1286	0.1496	0.1433	0.1623	0.1823	0.1665	0.2129	0.2076	0.2086	0.2276	0.2044	0.2192	0.2308	0.2403	0.2434	0.2308	0.1928	0.2055	0.2055	0.2276	0.1981	0.177	0.1928	0.2213	0.1844	0.1918	0.1823	0.1591	0.1612	0.118	0.1201	0.1286	0.1012	0.1212	0.1581	0.1855	0.1992	0.1876	0.3393	0.4078
Fungi_Release38	sporidiobolus_salmonicolor	C	0.3783	0.3804	0.3467	0.3625	0.3593	0.3709	0.3172	0.3319	0.3203	0.3446	0.3077	0.2919	0.3003	0.2877	0.2655	0.2792	0.2708	0.275	0.2655	0.2698	0.2455	0.2571	0.2792	0.2919	0.2771	0.2624	0.2687	0.3098	0.2677	0.2603	0.2424	0.2771	0.2813	0.2655	0.255	0.2497	0.2139	0.2171	0.216	0.2297	0.1359	0.1433	0.1117	0.1791	0.0959	0.1749	0.0495
Fungi_Release38	sporidiobolus_salmonicolor	G	0.2097	0.2244	0.2392	0.2318	0.254	0.196	0.2466	0.2529	0.2729	0.2824	0.2877	0.2782	0.3172	0.3003	0.3256	0.314	0.3288	0.3319	0.3214	0.3214	0.3277	0.3087	0.3203	0.334	0.3024	0.3182	0.2803	0.2771	0.2961	0.3214	0.3014	0.3309	0.3309	0.3161	0.3372	0.3509	0.4415	0.4236	0.4415	0.4974	0.6607	0.628	0.6301	0.4668	0.6481	0.3583	0.5142
Fungi_Release38	sporidiobolus_salmonicolor	T	0.3066	0.295	0.2824	0.2919	0.2771	0.2792	0.3056	0.2866	0.2571	0.2297	0.2424	0.2476	0.216	0.1992	0.2013	0.1981	0.1728	0.1886	0.1939	0.1781	0.1865	0.1907	0.1697	0.1812	0.215	0.2139	0.2234	0.215	0.2592	0.2255	0.235	0.2076	0.196	0.236	0.2487	0.2381	0.2266	0.2392	0.2139	0.1718	0.0822	0.0706	0.0727	0.1549	0.0685	0.1275	0.0285
Fungi_Release38	galerina_marginata_cbs_339_88	A	0.2165	0.2228	0.2228	0.2059	0.2027	0.2059	0.2017	0.2017	0.2154	0.227	0.1975	0.2154	0.2165	0.2207	0.2239	0.2291	0.2239	0.2302	0.2355	0.2471	0.2334	0.2291	0.2524	0.2386	0.2872	0.2355	0.2524	0.2334	0.2555	0.2365	0.2376	0.2608	0.2798	0.2798	0.2376	0.246	0.2936	0.2904	0.2323	0.1753	0.189	0.1573	0.169	0.2049	0.2619	0.2598	0.3907
Fungi_Release38	galerina_marginata_cbs_339_88	C	0.1922	0.1732	0.1869	0.1964	0.2291	0.2386	0.2228	0.2175	0.2524	0.2386	0.264	0.2524	0.2313	0.2323	0.2154	0.2122	0.2239	0.2323	0.2175	0.2144	0.2302	0.226	0.2112	0.207	0.1954	0.2122	0.2291	0.2355	0.2154	0.2239	0.2144	0.2049	0.2196	0.1954	0.2228	0.2144	0.1859	0.1742	0.2101	0.2038	0.095	0.0813	0.0803	0.1035	0.0845	0.1225	0.0739
Fungi_Release38	galerina_marginata_cbs_339_88	G	0.2714	0.2988	0.2534	0.2555	0.2291	0.2218	0.2027	0.2144	0.1837	0.1742	0.2017	0.1954	0.2101	0.2091	0.208	0.1954	0.1901	0.2175	0.1954	0.2228	0.1954	0.2112	0.2291	0.2408	0.227	0.2397	0.2027	0.1985	0.2154	0.2154	0.2027	0.2196	0.1827	0.1753	0.1932	0.2091	0.2334	0.2482	0.2767	0.339	0.5132	0.6135	0.6103	0.5026	0.5132	0.396	0.4287
Fungi_Release38	galerina_marginata_cbs_339_88	T	0.32	0.3052	0.3369	0.3421	0.339	0.3337	0.3728	0.3664	0.3485	0.3601	0.3369	0.3369	0.3421	0.3379	0.3527	0.3633	0.3622	0.32	0.3516	0.3157	0.3411	0.3337	0.3073	0.3136	0.2904	0.3126	0.3157	0.3326	0.3136	0.3242	0.3453	0.3147	0.3178	0.3495	0.3464	0.3305	0.2872	0.2872	0.2809	0.2819	0.2027	0.1478	0.1404	0.189	0.1404	0.2218	0.1067
Fungi_Release38	hypsizygus_marmoreus	A	0.2013	0.1981	0.1992	0.2097	0.1684	0.1907	0.1949	0.1907	0.1854	0.1843	0.196	0.1949	0.1896	0.2299	0.2055	0.2246	0.2214	0.2002	0.2426	0.2246	0.2023	0.232	0.2405	0.2172	0.25	0.2532	0.2362	0.2765	0.2617	0.215	0.2511	0.2235	0.2701	0.2235	0.2627	0.2839	0.2595	0.2267	0.2087	0.1568	0.1864	0.1621	0.1907	0.1917	0.2458	0.2521	0.3994
Fungi_Release38	hypsizygus_marmoreus	C	0.1769	0.2087	0.2341	0.2097	0.2278	0.2373	0.2331	0.2246	0.2585	0.2553	0.2383	0.2479	0.25	0.2002	0.2341	0.2352	0.2161	0.2585	0.2172	0.2225	0.2383	0.2203	0.2034	0.2161	0.2076	0.2352	0.2087	0.2119	0.2246	0.2087	0.2129	0.2002	0.2129	0.2182	0.1886	0.197	0.1875	0.1939	0.1854	0.1727	0.1165	0.0879	0.0636	0.1006	0.0996	0.1112	0.0837
Fungi_Release38	hypsizygus_marmoreus	G	0.2436	0.2468	0.2182	0.2161	0.2225	0.1833	0.197	0.214	0.1939	0.1864	0.2023	0.2044	0.2087	0.2034	0.2214	0.214	0.2235	0.2256	0.2097	0.2193	0.2256	0.25	0.2203	0.2542	0.2458	0.2246	0.2267	0.1939	0.2182	0.2066	0.2097	0.2331	0.1801	0.178	0.2278	0.1981	0.2256	0.2373	0.2818	0.3612	0.5286	0.6282	0.6006	0.5297	0.5169	0.3792	0.4131
Fungi_Release38	hypsizygus_marmoreus	T	0.3782	0.3464	0.3485	0.3644	0.3814	0.3888	0.375	0.3708	0.3623	0.3739	0.3633	0.3528	0.3517	0.3665	0.339	0.3263	0.339	0.3157	0.3305	0.3337	0.3337	0.2977	0.3358	0.3125	0.2966	0.2871	0.3284	0.3178	0.2956	0.3697	0.3263	0.3432	0.3369	0.3803	0.321	0.321	0.3273	0.3422	0.3242	0.3093	0.1684	0.1218	0.1451	0.178	0.1377	0.2574	0.1038
Fungi_Release38	batrachochytrium_salamandrivorans	A	0.2625	0.2402	0.2359	0.2465	0.2232	0.2391	0.2359	0.2614	0.2561	0.2423	0.255	0.2391	0.2444	0.2582	0.2561	0.2455	0.2412	0.2561	0.2497	0.2253	0.2465	0.237	0.2285	0.2306	0.2083	0.2253	0.2104	0.22	0.2115	0.2295	0.2019	0.1881	0.203	0.1892	0.1817	0.1541	0.1679	0.1403	0.136	0.1211	0.1052	0.1095	0.1626	0.2487	0.3114	0.3061	0.4963
Fungi_Release38	batrachochytrium_salamandrivorans	C	0.17	0.1828	0.1732	0.1764	0.1732	0.1658	0.153	0.1658	0.1647	0.1838	0.1637	0.1679	0.1658	0.1647	0.1541	0.1817	0.1732	0.1541	0.1658	0.1626	0.1626	0.1743	0.1637	0.1562	0.1637	0.1626	0.1488	0.1541	0.152	0.1254	0.1413	0.1498	0.1296	0.1424	0.1307	0.1126	0.0967	0.0818	0.0861	0.0595	0.0351	0.034	0.0351	0.0383	0.0606	0.0616	0.0723
Fungi_Release38	batrachochytrium_salamandrivorans	G	0.1573	0.1775	0.1647	0.1541	0.17	0.1626	0.169	0.1615	0.1796	0.1637	0.1838	0.1456	0.1477	0.1509	0.1711	0.1573	0.1552	0.1424	0.1711	0.1753	0.169	0.1552	0.1817	0.1732	0.187	0.1605	0.1828	0.1817	0.1785	0.1753	0.1913	0.1881	0.2274	0.2306	0.2689	0.339	0.3539	0.3932	0.441	0.5611	0.7152	0.7173	0.6663	0.5101	0.4506	0.2667	0.255
Fungi_Release38	batrachochytrium_salamandrivorans	T	0.4102	0.3996	0.4261	0.423	0.4336	0.4325	0.4421	0.4113	0.3996	0.4102	0.3974	0.4474	0.4421	0.4261	0.4187	0.4155	0.4304	0.4474	0.4134	0.4368	0.4219	0.4336	0.4261	0.44	0.441	0.4516	0.458	0.4442	0.458	0.4697	0.4655	0.474	0.44	0.4378	0.4187	0.3943	0.3815	0.3847	0.3369	0.2582	0.1445	0.1392	0.136	0.203	0.1775	0.3656	0.1764
Fungi_Release38	puccinia_graminis	A	0.2913	0.2805	0.2751	0.288	0.288	0.288	0.2902	0.2837	0.2611	0.2934	0.2977	0.2567	0.2751	0.2794	0.247	0.2729	0.2708	0.2923	0.2783	0.2373	0.2557	0.2557	0.2718	0.233	0.2406	0.2298	0.2362	0.2384	0.2535	0.205	0.1985	0.2168	0.206	0.164	0.1575	0.1489	0.1402	0.1381	0.1435	0.1057	0.1543	0.1942	0.2319	0.2578	0.3247	0.3463	0.5167
Fungi_Release38	puccinia_graminis	C	0.2104	0.2265	0.2341	0.219	0.1845	0.2255	0.1996	0.1909	0.1834	0.1899	0.2006	0.2071	0.1758	0.2017	0.2201	0.1855	0.1812	0.1802	0.1715	0.1726	0.1834	0.1974	0.1521	0.1618	0.1704	0.2039	0.1855	0.1586	0.1748	0.1931	0.1855	0.1381	0.1413	0.1543	0.1521	0.1489	0.1532	0.1305	0.1176	0.1273	0.0529	0.0712	0.0561	0.0874	0.069	0.1003	0.0734
Fungi_Release38	puccinia_graminis	G	0.164	0.1866	0.1769	0.1855	0.2017	0.1877	0.1888	0.1931	0.1909	0.1737	0.1866	0.206	0.1823	0.1909	0.1866	0.1812	0.192	0.192	0.1899	0.205	0.1866	0.1758	0.1953	0.2157	0.2104	0.206	0.1586	0.2265	0.1866	0.1769	0.206	0.2395	0.2147	0.2093	0.2201	0.2923	0.3366	0.3657	0.3937	0.4628	0.6257	0.5976	0.5566	0.4531	0.4498	0.3398	0.2988
Fungi_Release38	puccinia_graminis	T	0.3344	0.3064	0.3139	0.3074	0.3258	0.2988	0.3215	0.3323	0.3646	0.343	0.315	0.3301	0.3668	0.3279	0.3463	0.3603	0.356	0.3355	0.3603	0.3851	0.3743	0.3711	0.3808	0.3894	0.3786	0.3603	0.4196	0.3765	0.3851	0.425	0.4099	0.4056	0.438	0.4725	0.4703	0.4099	0.37	0.3657	0.3452	0.3042	0.1672	0.137	0.1553	0.2017	0.1564	0.2136	0.1111
Fungi_Release38	phanerochaete_carnosa_hhb_10118_sp	A	0.2009	0.162	0.1955	0.1911	0.1847	0.1847	0.1728	0.1879	0.162	0.1803	0.1803	0.2084	0.1944	0.1749	0.2181	0.1641	0.1933	0.1965	0.2181	0.2019	0.2019	0.1911	0.2203	0.2322	0.2257	0.2354	0.2073	0.2527	0.2451	0.2441	0.203	0.2203	0.2279	0.2127	0.2322	0.2354	0.2538	0.2646	0.2603	0.1685	0.2009	0.1793	0.1587	0.1771	0.1976	0.1782	0.3661
Fungi_Release38	phanerochaete_carnosa_hhb_10118_sp	C	0.216	0.2484	0.2354	0.2613	0.2603	0.2397	0.2959	0.2775	0.2948	0.2873	0.297	0.2667	0.2775	0.2711	0.2894	0.2862	0.2765	0.2797	0.2549	0.2484	0.257	0.2873	0.2279	0.2473	0.2365	0.2268	0.2441	0.2441	0.2387	0.2549	0.2441	0.2333	0.2613	0.2721	0.2613	0.2516	0.2441	0.2117	0.2192	0.2581	0.1339	0.1026	0.1307	0.1447	0.1177	0.1728	0.0918
Fungi_Release38	phanerochaete_carnosa_hhb_10118_sp	G	0.3099	0.297	0.2592	0.2613	0.2246	0.2376	0.2246	0.2149	0.2149	0.2095	0.2095	0.189	0.2225	0.257	0.1911	0.2387	0.2106	0.2246	0.2203	0.2603	0.2516	0.2451	0.2883	0.2354	0.2754	0.257	0.2743	0.2603	0.257	0.23	0.2473	0.2538	0.2365	0.2181	0.2225	0.2279	0.2473	0.2905	0.2905	0.3315	0.5335	0.5994	0.6123	0.5108	0.5605	0.473	0.4633
Fungi_Release38	phanerochaete_carnosa_hhb_10118_sp	T	0.2732	0.2927	0.3099	0.2862	0.3305	0.338	0.3067	0.3197	0.3283	0.3229	0.3132	0.3359	0.3056	0.297	0.3013	0.311	0.3197	0.2991	0.3067	0.2894	0.2894	0.2765	0.2635	0.2851	0.2624	0.2808	0.2743	0.243	0.2592	0.2711	0.3056	0.2927	0.2743	0.297	0.284	0.2851	0.2549	0.2333	0.23	0.2419	0.1317	0.1188	0.0983	0.1674	0.1242	0.176	0.0788
Fungi_Release38	mixia_osmundae_iam_14324	A	0.1899	0.1877	0.191	0.18	0.1976	0.1789	0.157	0.1701	0.1581	0.1723	0.1943	0.1789	0.1899	0.1888	0.2217	0.1789	0.1954	0.2086	0.2053	0.2151	0.2206	0.2086	0.2119	0.2031	0.202	0.2086	0.202	0.2108	0.2064	0.2206	0.2173	0.2239	0.2064	0.2053	0.1987	0.2459	0.2514	0.3106	0.2481	0.157	0.1844	0.1789	0.1899	0.2151	0.1723	0.2173	0.3633
Fungi_Release38	mixia_osmundae_iam_14324	C	0.2459	0.2382	0.2492	0.2667	0.2689	0.2744	0.3161	0.315	0.348	0.2953	0.348	0.3041	0.3216	0.3271	0.3041	0.2876	0.3183	0.3019	0.2975	0.2711	0.2634	0.2975	0.2821	0.2503	0.2777	0.2656	0.2986	0.3183	0.3052	0.2953	0.2645	0.2733	0.2799	0.2689	0.2733	0.2327	0.2141	0.1976	0.2514	0.2327	0.1175	0.1043	0.1581	0.191	0.1175	0.157	0.0483
Fungi_Release38	mixia_osmundae_iam_14324	G	0.3315	0.3315	0.3052	0.2887	0.2634	0.2536	0.2294	0.2634	0.225	0.2327	0.2064	0.2426	0.2217	0.2404	0.1965	0.2722	0.2305	0.2634	0.2415	0.2722	0.2678	0.2744	0.2591	0.3019	0.2591	0.281	0.2667	0.213	0.2514	0.2525	0.303	0.2887	0.2645	0.2569	0.2678	0.2426	0.2964	0.2931	0.2997	0.4083	0.6125	0.6191	0.551	0.461	0.6202	0.4918	0.5477
Fungi_Release38	mixia_osmundae_iam_14324	T	0.2327	0.2426	0.2547	0.2645	0.27	0.2931	0.2975	0.2514	0.2689	0.2997	0.2514	0.2744	0.2667	0.2437	0.2777	0.2613	0.2558	0.2261	0.2558	0.2415	0.2481	0.2195	0.247	0.2448	0.2613	0.2448	0.2327	0.258	0.2371	0.2316	0.2151	0.2141	0.2492	0.2689	0.2602	0.2788	0.2382	0.1987	0.2009	0.202	0.0856	0.0977	0.101	0.1328	0.09	0.1339	0.0406
Fungi_Release38	postia_placenta_mad_698_r	A	0.191	0.1822	0.1943	0.2009	0.2349	0.2086	0.2053	0.2064	0.1833	0.1965	0.2086	0.2009	0.2119	0.2382	0.202	0.2206	0.2151	0.2053	0.2086	0.2294	0.2086	0.2459	0.2228	0.2086	0.213	0.2503	0.2547	0.247	0.2108	0.2108	0.2371	0.2206	0.2569	0.2261	0.2514	0.225	0.2459	0.2591	0.2141	0.1383	0.1723	0.157	0.1592	0.1734	0.2009	0.1811	0.3721
Fungi_Release38	postia_placenta_mad_698_r	C	0.2437	0.2393	0.258	0.2689	0.2634	0.2711	0.247	0.2613	0.2667	0.2788	0.2459	0.2613	0.2536	0.2426	0.2448	0.2371	0.258	0.2547	0.292	0.2206	0.2722	0.27	0.2744	0.2283	0.2678	0.2075	0.2239	0.2514	0.2678	0.2184	0.2327	0.2744	0.2261	0.2744	0.2514	0.2613	0.2206	0.2316	0.2536	0.2239	0.1405	0.1131	0.0955	0.1427	0.1229	0.1734	0.0812
Fungi_Release38	postia_placenta_mad_698_r	G	0.3106	0.2975	0.2997	0.2986	0.2327	0.2865	0.2975	0.2613	0.2788	0.2492	0.2547	0.2711	0.2832	0.2525	0.2931	0.2733	0.2667	0.2788	0.247	0.2711	0.2821	0.2415	0.2656	0.2986	0.2788	0.2733	0.2975	0.2525	0.2898	0.3117	0.2503	0.2448	0.2349	0.2613	0.2151	0.2415	0.2645	0.2766	0.3216	0.4116	0.5686	0.5939	0.6224	0.5269	0.5774	0.4413	0.4665
Fungi_Release38	postia_placenta_mad_698_r	T	0.2547	0.281	0.2481	0.2316	0.2689	0.2338	0.2503	0.2711	0.2711	0.2755	0.2909	0.2667	0.2514	0.2667	0.2602	0.2689	0.2602	0.2613	0.2525	0.2788	0.2371	0.2426	0.2371	0.2645	0.2404	0.2689	0.2239	0.2492	0.2316	0.2591	0.2799	0.2602	0.2821	0.2382	0.2821	0.2722	0.2689	0.2327	0.2108	0.2261	0.1186	0.1361	0.1229	0.157	0.0988	0.2042	0.0801
Fungi_Release38	amanita_muscaria_koide_bx008	A	0.25	0.2203	0.2379	0.228	0.228	0.2214	0.2302	0.2225	0.2225	0.2203	0.2115	0.2489	0.2115	0.2203	0.2368	0.2137	0.2137	0.2214	0.2522	0.25	0.2456	0.2533	0.2467	0.25	0.2522	0.2533	0.2588	0.2445	0.2687	0.2632	0.2775	0.2467	0.2401	0.2621	0.2896	0.2478	0.2731	0.2841	0.2775	0.2059	0.239	0.2192	0.196	0.228	0.2148	0.2445	0.4328
Fungi_Release38	amanita_muscaria_koide_bx008	C	0.1432	0.174	0.185	0.1993	0.1872	0.1773	0.2148	0.2555	0.2489	0.2467	0.2654	0.2379	0.2544	0.2467	0.2533	0.2346	0.2401	0.2654	0.2159	0.2148	0.1982	0.2302	0.2269	0.2126	0.2059	0.2104	0.2048	0.228	0.2192	0.228	0.2026	0.2335	0.2203	0.2247	0.2236	0.2423	0.2059	0.1938	0.1894	0.2159	0.1167	0.0837	0.0947	0.1002	0.0958	0.1267	0.0903
Fungi_Release38	amanita_muscaria_koide_bx008	G	0.3304	0.2907	0.2786	0.239	0.2522	0.2511	0.2037	0.1894	0.1894	0.1718	0.1861	0.1751	0.1861	0.1861	0.1938	0.1993	0.2324	0.185	0.2048	0.196	0.2368	0.2081	0.2159	0.2357	0.2335	0.2346	0.2258	0.1971	0.207	0.1938	0.2423	0.1839	0.2015	0.196	0.1773	0.1839	0.2115	0.2753	0.2687	0.3392	0.4769	0.5121	0.554	0.5066	0.5771	0.4493	0.3844
Fungi_Release38	amanita_muscaria_koide_bx008	T	0.2764	0.315	0.2985	0.3337	0.3326	0.3502	0.3513	0.3326	0.3392	0.3612	0.337	0.3381	0.348	0.3469	0.3161	0.3524	0.3139	0.3282	0.3271	0.3392	0.3194	0.3084	0.3106	0.3018	0.3084	0.3018	0.3106	0.3304	0.3051	0.315	0.2775	0.3359	0.3381	0.3172	0.3095	0.326	0.3095	0.2467	0.2643	0.239	0.1674	0.185	0.1553	0.1652	0.1123	0.1795	0.0925
Fungi_Release38	phialocephala_subalpina	A	0.2137	0.2412	0.2368	0.2236	0.2522	0.2643	0.283	0.2621	0.239	0.2203	0.25	0.2324	0.2566	0.2357	0.2985	0.2775	0.3029	0.2952	0.2819	0.2841	0.2687	0.2885	0.3029	0.3073	0.3172	0.2907	0.2952	0.3073	0.3249	0.293	0.2919	0.2819	0.2676	0.25	0.2665	0.2577	0.272	0.3073	0.326	0.2764	0.2203	0.1696	0.1861	0.1872	0.228	0.3348	0.5055
Fungi_Release38	phialocephala_subalpina	C	0.2313	0.1938	0.2037	0.1905	0.2181	0.2115	0.2203	0.2192	0.2258	0.2247	0.2621	0.2687	0.2302	0.2434	0.1971	0.2302	0.2081	0.1894	0.1883	0.2181	0.1784	0.1751	0.1465	0.1773	0.1443	0.207	0.163	0.1553	0.1674	0.1982	0.2214	0.2203	0.2059	0.1993	0.1927	0.2126	0.2335	0.1641	0.1465	0.1718	0.1233	0.0848	0.0661	0.0573	0.076	0.0771	0.065
Fungi_Release38	phialocephala_subalpina	G	0.228	0.2753	0.2566	0.2676	0.2456	0.2258	0.1982	0.2214	0.228	0.2511	0.2004	0.2192	0.2093	0.2037	0.2258	0.207	0.1982	0.2555	0.2709	0.2368	0.2731	0.2555	0.2742	0.2577	0.2731	0.25	0.2687	0.2841	0.2643	0.2566	0.2104	0.2203	0.2423	0.2489	0.2379	0.2423	0.2126	0.217	0.2225	0.2654	0.4075	0.5892	0.6189	0.6145	0.5595	0.4262	0.3513
Fungi_Release38	phialocephala_subalpina	T	0.3271	0.2896	0.3029	0.3183	0.2841	0.2985	0.2985	0.2974	0.3073	0.304	0.2874	0.2797	0.304	0.3172	0.2786	0.2852	0.2907	0.2599	0.2588	0.261	0.2797	0.2808	0.2764	0.2577	0.2654	0.2522	0.2731	0.2533	0.2434	0.2522	0.2764	0.2775	0.2841	0.3018	0.3029	0.2874	0.2819	0.3117	0.3051	0.2863	0.2489	0.1564	0.1289	0.141	0.1366	0.1619	0.0782
Fungi_Release38	moniliophthora_roreri_mca_2997	A	0.2304	0.217	0.1957	0.2226	0.2248	0.2002	0.2002	0.217	0.2136	0.2114	0.2226	0.2125	0.2125	0.2416	0.2181	0.2383	0.2204	0.2304	0.2226	0.2215	0.2517	0.2729	0.2494	0.2181	0.2573	0.2427	0.236	0.2562	0.2394	0.264	0.2371	0.2427	0.2562	0.2942	0.2584	0.2651	0.2427	0.3065	0.2494	0.2058	0.1935	0.1779	0.1834	0.2058	0.2673	0.2562	0.4564
Fungi_Release38	moniliophthora_roreri_mca_2997	C	0.1667	0.1902	0.198	0.2025	0.2081	0.2136	0.2673	0.2528	0.2472	0.2685	0.2573	0.2651	0.2718	0.2472	0.2562	0.236	0.2416	0.264	0.2472	0.2494	0.2181	0.2092	0.2136	0.2338	0.2427	0.2215	0.2483	0.2282	0.2371	0.2282	0.236	0.2293	0.2226	0.2103	0.2595	0.1857	0.198	0.2002	0.2136	0.1935	0.123	0.0996	0.0839	0.0783	0.0984	0.1208	0.0973
Fungi_Release38	moniliophthora_roreri_mca_2997	G	0.3031	0.3031	0.2606	0.2315	0.2371	0.2002	0.1935	0.1678	0.1767	0.1521	0.1633	0.17	0.179	0.1779	0.2114	0.1857	0.1957	0.2114	0.1723	0.2047	0.2103	0.1857	0.2036	0.2315	0.2069	0.226	0.2293	0.2114	0.2159	0.1969	0.1969	0.2136	0.2036	0.151	0.1734	0.1935	0.2383	0.2192	0.2539	0.2953	0.5123	0.5928	0.6063	0.5414	0.4978	0.3926	0.3591
Fungi_Release38	moniliophthora_roreri_mca_2997	T	0.2998	0.2897	0.3456	0.3434	0.33	0.3859	0.3389	0.3624	0.3624	0.368	0.3568	0.3523	0.3367	0.3333	0.3143	0.34	0.3423	0.2942	0.3579	0.3244	0.3199	0.3322	0.3333	0.3166	0.2931	0.3098	0.2864	0.3043	0.3076	0.311	0.33	0.3143	0.3177	0.3445	0.3087	0.3557	0.321	0.274	0.283	0.3054	0.1711	0.1298	0.1264	0.1745	0.1365	0.2304	0.0872
Fungi_Release38	mixia_osmundae_iam_14324_gca_000708205	A	0.1853	0.1819	0.1876	0.1853	0.1955	0.1797	0.1582	0.1729	0.1548	0.1695	0.1944	0.1706	0.1932	0.1842	0.2181	0.1853	0.1819	0.2056	0.1989	0.2136	0.2192	0.2113	0.2181	0.1955	0.1989	0.209	0.2023	0.2203	0.2079	0.2192	0.2147	0.2203	0.209	0.2023	0.1932	0.2497	0.2588	0.3062	0.2531	0.1638	0.1808	0.1842	0.1876	0.2169	0.1718	0.2181	0.3627
Fungi_Release38	mixia_osmundae_iam_14324_gca_000708205	C	0.2599	0.2316	0.2497	0.2588	0.2678	0.2734	0.3119	0.3062	0.3458	0.3028	0.3537	0.3073	0.3186	0.3198	0.3141	0.287	0.3288	0.2927	0.3017	0.2678	0.261	0.3017	0.2768	0.2497	0.2825	0.2701	0.2938	0.3119	0.3085	0.2949	0.2757	0.2723	0.2791	0.2734	0.2655	0.2362	0.2056	0.2011	0.2497	0.2362	0.1209	0.1141	0.1492	0.1944	0.1164	0.1525	0.0531
Fungi_Release38	mixia_osmundae_iam_14324_gca_000708205	G	0.3232	0.3401	0.3073	0.2915	0.2644	0.2531	0.2305	0.2655	0.2305	0.2249	0.2068	0.2463	0.2102	0.2441	0.1944	0.2655	0.2305	0.2723	0.2418	0.2746	0.2689	0.2633	0.2576	0.3062	0.2542	0.2701	0.2701	0.2113	0.2475	0.2497	0.3062	0.2915	0.261	0.2554	0.2825	0.2373	0.2972	0.3006	0.296	0.3989	0.609	0.6023	0.5593	0.4588	0.6282	0.4904	0.5412
Fungi_Release38	mixia_osmundae_iam_14324_gca_000708205	T	0.2316	0.2463	0.2554	0.2644	0.2723	0.2938	0.2994	0.2554	0.2689	0.3028	0.2452	0.2757	0.278	0.252	0.2734	0.2621	0.2588	0.2294	0.2576	0.2441	0.2508	0.2237	0.2475	0.2486	0.2644	0.2508	0.2339	0.2565	0.2362	0.2362	0.2034	0.2158	0.2508	0.2689	0.2588	0.2768	0.2384	0.1921	0.2011	0.2011	0.0893	0.0994	0.104	0.1299	0.0836	0.139	0.0429
Fungi_Release38	rhodotorula_toruloides_np11	A	0.0958	0.1026	0.0992	0.114	0.1049	0.0878	0.122	0.1049	0.1106	0.1152	0.1368	0.1517	0.1311	0.1596	0.1494	0.1585	0.1733	0.1881	0.1847	0.1881	0.1745	0.1961	0.1938	0.1973	0.1836	0.1767	0.2075	0.2292	0.1938	0.203	0.1824	0.1984	0.2349	0.1995	0.1893	0.1619	0.1414	0.1072	0.1231	0.1083	0.138	0.1311	0.1688	0.1368	0.195	0.2623	0.4766
Fungi_Release38	rhodotorula_toruloides_np11	C	0.4151	0.4276	0.4208	0.3854	0.4151	0.3854	0.4014	0.4059	0.4014	0.3751	0.3421	0.3432	0.3466	0.3124	0.2987	0.333	0.3079	0.2702	0.2737	0.2885	0.2828	0.2463	0.252	0.2645	0.2805	0.2691	0.2623	0.2395	0.2554	0.2452	0.2463	0.2543	0.2566	0.2474	0.2349	0.2292	0.1973	0.2269	0.2246	0.2121	0.1072	0.1471	0.0912	0.2235	0.0844	0.2645	0.0137
Fungi_Release38	rhodotorula_toruloides_np11	G	0.1813	0.1916	0.179	0.1984	0.1676	0.1973	0.1676	0.2007	0.1745	0.2098	0.2269	0.2144	0.2463	0.2657	0.2782	0.244	0.2725	0.3113	0.3113	0.3136	0.3523	0.333	0.3546	0.325	0.3044	0.3261	0.3147	0.2976	0.3227	0.3136	0.2999	0.317	0.2976	0.309	0.333	0.374	0.3979	0.3706	0.3843	0.423	0.6545	0.6214	0.6636	0.4778	0.6716	0.366	0.4971
Fungi_Release38	rhodotorula_toruloides_np11	T	0.3079	0.2782	0.301	0.3022	0.3124	0.3295	0.309	0.2885	0.3136	0.2999	0.2942	0.2908	0.2759	0.2623	0.2737	0.2645	0.2463	0.2303	0.2303	0.2098	0.1904	0.2246	0.1995	0.2132	0.2315	0.2281	0.2155	0.2338	0.2281	0.2383	0.2714	0.2303	0.2109	0.244	0.2429	0.2349	0.2634	0.2953	0.268	0.2566	0.1003	0.1003	0.0764	0.1619	0.049	0.1072	0.0125
Fungi_Release38	rhodotorula_sp_jg_1b	A	0.1581	0.1616	0.1651	0.1837	0.186	0.2093	0.207	0.1977	0.2035	0.2058	0.2209	0.207	0.2186	0.2221	0.2035	0.2233	0.2163	0.2535	0.2256	0.2163	0.2174	0.1988	0.2163	0.2221	0.2209	0.2186	0.2093	0.207	0.1965	0.2256	0.2023	0.1767	0.1744	0.1942	0.164	0.1686	0.1512	0.1221	0.1093	0.1326	0.1651	0.1663	0.207	0.1826	0.2651	0.2709	0.4384
Fungi_Release38	rhodotorula_sp_jg_1b	C	0.3372	0.3407	0.3349	0.3302	0.3163	0.2756	0.2988	0.3116	0.2826	0.3047	0.3221	0.2802	0.2884	0.3058	0.2965	0.25	0.3	0.2814	0.3023	0.3012	0.2698	0.293	0.2674	0.2721	0.2895	0.2837	0.2977	0.2756	0.3198	0.2814	0.3244	0.2988	0.314	0.2826	0.2965	0.3047	0.2744	0.2872	0.2814	0.2698	0.1651	0.1605	0.1314	0.2058	0.1279	0.2047	0.0895
Fungi_Release38	rhodotorula_sp_jg_1b	G	0.2547	0.2535	0.2651	0.25	0.2733	0.2674	0.2756	0.2605	0.3035	0.2744	0.2477	0.293	0.2895	0.2733	0.3023	0.2895	0.3081	0.2419	0.2826	0.2779	0.293	0.286	0.2709	0.2779	0.2547	0.2698	0.2837	0.2558	0.2547	0.2453	0.2453	0.2709	0.257	0.2512	0.2802	0.2698	0.3256	0.3767	0.3674	0.4128	0.5709	0.5919	0.5872	0.4942	0.5488	0.3779	0.4488
Fungi_Release38	rhodotorula_sp_jg_1b	T	0.25	0.2442	0.2349	0.236	0.2244	0.2477	0.2186	0.2302	0.2105	0.2151	0.2093	0.2198	0.2035	0.1988	0.1977	0.2372	0.1756	0.2233	0.1895	0.2047	0.2198	0.2221	0.2453	0.2279	0.2349	0.2279	0.2093	0.2616	0.2291	0.2477	0.2279	0.2535	0.2547	0.2721	0.2593	0.257	0.2488	0.214	0.2419	0.1849	0.0988	0.0814	0.0744	0.1174	0.0581	0.1465	0.0233
Fungi_Release38	moniliophthora_roreri	A	0.2258	0.2107	0.2002	0.2142	0.2212	0.2433	0.2061	0.2154	0.213	0.2165	0.22	0.2142	0.2235	0.2212	0.227	0.2515	0.2258	0.2573	0.2224	0.2247	0.2596	0.2806	0.2549	0.2247	0.2643	0.2328	0.2189	0.2398	0.2328	0.2526	0.2212	0.2503	0.2584	0.2864	0.2515	0.2538	0.2538	0.305	0.2573	0.2107	0.2061	0.1793	0.1979	0.2026	0.2724	0.2328	0.4785
Fungi_Release38	moniliophthora_roreri	C	0.1537	0.1909	0.1863	0.2177	0.1932	0.2002	0.2608	0.2526	0.2549	0.2375	0.2561	0.2712	0.2584	0.2549	0.2421	0.2503	0.241	0.2445	0.2212	0.2398	0.2142	0.2049	0.2235	0.2363	0.2456	0.2258	0.2584	0.2317	0.2445	0.2282	0.2375	0.2317	0.2235	0.2026	0.2596	0.2107	0.2095	0.2084	0.22	0.2049	0.1141	0.0873	0.0838	0.0885	0.0966	0.1315	0.099
Fungi_Release38	moniliophthora_roreri	G	0.3283	0.2934	0.2643	0.2317	0.241	0.1758	0.2014	0.1781	0.1863	0.1641	0.1711	0.1583	0.1769	0.1769	0.2049	0.1653	0.1909	0.1944	0.2002	0.2014	0.2037	0.2014	0.2084	0.22	0.1956	0.2154	0.2189	0.2305	0.2154	0.1932	0.2142	0.2026	0.2002	0.1572	0.1572	0.1828	0.2165	0.1921	0.2445	0.2887	0.5157	0.6042	0.5937	0.5204	0.5052	0.4051	0.3271
Fungi_Release38	moniliophthora_roreri	T	0.2922	0.305	0.3492	0.3364	0.3446	0.3807	0.3318	0.3539	0.3458	0.3818	0.3527	0.3562	0.3411	0.3469	0.326	0.3329	0.3423	0.3038	0.3562	0.3341	0.3225	0.3132	0.3132	0.319	0.2945	0.326	0.3038	0.298	0.3073	0.326	0.3271	0.3155	0.3178	0.3539	0.3318	0.3527	0.3201	0.2945	0.2782	0.2957	0.1641	0.1292	0.1246	0.1886	0.1257	0.2305	0.0955
Fungi_Release38	schizophyllum_commune_h4_8	A	0.1988	0.1723	0.1663	0.1675	0.1663	0.1723	0.1795	0.1506	0.1723	0.1964	0.1843	0.1783	0.188	0.1988	0.1843	0.1783	0.2024	0.2072	0.194	0.194	0.2157	0.212	0.2181	0.1928	0.2253	0.2024	0.2373	0.241	0.2036	0.2157	0.2337	0.206	0.241	0.2072	0.2	0.1783	0.2675	0.3	0.306	0.2145	0.1783	0.1675	0.1639	0.1687	0.1723	0.1807	0.341
Fungi_Release38	schizophyllum_commune_h4_8	C	0.1819	0.1976	0.2048	0.2145	0.1964	0.247	0.2434	0.253	0.2578	0.2687	0.2735	0.2614	0.2446	0.2627	0.2494	0.3	0.2566	0.2446	0.2639	0.2663	0.2494	0.2301	0.2602	0.2398	0.2349	0.2482	0.2494	0.2265	0.2867	0.2494	0.2277	0.2373	0.206	0.2783	0.2651	0.2904	0.2193	0.212	0.2265	0.2578	0.1482	0.1012	0.088	0.1639	0.106	0.1867	0.0867
Fungi_Release38	schizophyllum_commune_h4_8	G	0.3759	0.3651	0.3663	0.3482	0.3663	0.3229	0.3108	0.2988	0.3133	0.2759	0.2747	0.2928	0.2434	0.2747	0.2759	0.2566	0.2892	0.2855	0.2783	0.3036	0.2795	0.3084	0.312	0.3289	0.2928	0.3301	0.2988	0.2807	0.2843	0.3	0.2795	0.3145	0.2819	0.2446	0.2373	0.2578	0.2386	0.2952	0.2783	0.3301	0.5482	0.6325	0.6566	0.5133	0.5976	0.4145	0.5205
Fungi_Release38	schizophyllum_commune_h4_8	T	0.2434	0.2651	0.2627	0.2699	0.2711	0.2578	0.2663	0.2976	0.2566	0.259	0.2675	0.2675	0.3241	0.2639	0.2904	0.2651	0.2518	0.2627	0.2639	0.2361	0.2554	0.2494	0.2096	0.2386	0.247	0.2193	0.2145	0.2518	0.2253	0.2349	0.259	0.2422	0.2711	0.2699	0.2976	0.2735	0.2747	0.1928	0.1892	0.1976	0.1253	0.0988	0.0916	0.1542	0.1241	0.2181	0.0518
Fungi_Release38	cryptococcus_neoformans_var_neoformans_b_3501a	A	0.2145	0.1903	0.2303	0.2315	0.2291	0.223	0.2242	0.2121	0.2315	0.2388	0.2388	0.2364	0.263	0.2667	0.2388	0.2327	0.2558	0.2691	0.2388	0.2545	0.2897	0.2667	0.2897	0.2982	0.2812	0.3079	0.3067	0.3103	0.2824	0.2994	0.2873	0.2727	0.2667	0.2703	0.2497	0.2606	0.2739	0.3055	0.2909	0.2048	0.2	0.1818	0.2109	0.2303	0.2521	0.3455	0.4521
Fungi_Release38	cryptococcus_neoformans_var_neoformans_b_3501a	C	0.1685	0.2121	0.2048	0.1939	0.183	0.2121	0.2206	0.2109	0.2267	0.2267	0.1964	0.2182	0.2255	0.2121	0.1927	0.2048	0.1818	0.1988	0.2012	0.1891	0.1867	0.1806	0.1782	0.1539	0.177	0.1976	0.1624	0.1661	0.1939	0.2085	0.1915	0.1939	0.217	0.2109	0.2218	0.2121	0.1612	0.1661	0.1733	0.1697	0.1055	0.0861	0.0618	0.0994	0.0642	0.1103	0.0752
Fungi_Release38	cryptococcus_neoformans_var_neoformans_b_3501a	G	0.2982	0.2339	0.257	0.2194	0.2558	0.1988	0.2109	0.2267	0.1988	0.1952	0.2158	0.2	0.1794	0.1988	0.2133	0.2073	0.2242	0.24	0.2315	0.2424	0.2352	0.2703	0.2691	0.28	0.2545	0.2436	0.263	0.2642	0.2436	0.2352	0.257	0.2533	0.2473	0.2436	0.2315	0.2194	0.2533	0.2776	0.2703	0.3648	0.5394	0.6242	0.6	0.4933	0.5333	0.3709	0.3552
Fungi_Release38	cryptococcus_neoformans_var_neoformans_b_3501a	T	0.3188	0.3636	0.3079	0.3552	0.3321	0.3661	0.3442	0.3503	0.343	0.3394	0.3491	0.3455	0.3321	0.3224	0.3552	0.3552	0.3382	0.2921	0.3285	0.3139	0.2885	0.2824	0.263	0.2679	0.2873	0.2509	0.2679	0.2594	0.28	0.257	0.2642	0.28	0.2691	0.2752	0.297	0.3079	0.3115	0.2509	0.2655	0.2606	0.1552	0.1079	0.1273	0.177	0.1503	0.1733	0.1176
Fungi_Release38	puccinia_triticina	A	0.2196	0.2442	0.2466	0.254	0.2589	0.2258	0.2528	0.2294	0.2258	0.2405	0.2368	0.227	0.2417	0.2638	0.2663	0.2552	0.2356	0.254	0.2601	0.2356	0.2233	0.238	0.238	0.2331	0.216	0.2491	0.2442	0.2319	0.2	0.2086	0.2061	0.2025	0.2	0.1877	0.1804	0.1963	0.1583	0.1485	0.1399	0.1252	0.1755	0.173	0.184	0.2012	0.2748	0.2773	0.4491
Fungi_Release38	puccinia_triticina	C	0.2982	0.2663	0.2675	0.2663	0.2417	0.2933	0.2675	0.2552	0.2429	0.2258	0.281	0.2785	0.2429	0.2258	0.2209	0.227	0.2466	0.2626	0.2429	0.2245	0.216	0.2172	0.2319	0.2012	0.2025	0.2368	0.2307	0.2245	0.2098	0.2331	0.2086	0.2233	0.1951	0.2074	0.2086	0.1902	0.1779	0.1926	0.1828	0.1644	0.1153	0.1006	0.0822	0.1166	0.0822	0.1215	0.1055
Fungi_Release38	puccinia_triticina	G	0.216	0.189	0.1988	0.1975	0.2147	0.2221	0.2061	0.2245	0.254	0.227	0.2282	0.2184	0.227	0.2147	0.2258	0.2147	0.227	0.2196	0.2307	0.2429	0.2479	0.2515	0.2356	0.2663	0.2454	0.2503	0.2184	0.2429	0.2479	0.2135	0.2172	0.2479	0.2209	0.254	0.2552	0.2994	0.3301	0.3276	0.3558	0.4613	0.5607	0.5988	0.6147	0.5178	0.5202	0.3939	0.3546
Fungi_Release38	puccinia_triticina	T	0.2663	0.3006	0.2871	0.2822	0.2847	0.2589	0.2736	0.2908	0.2773	0.3067	0.254	0.2761	0.2883	0.2957	0.2871	0.3031	0.2908	0.2638	0.2663	0.2969	0.3129	0.2933	0.2945	0.2994	0.3362	0.2638	0.3067	0.3006	0.3423	0.3448	0.3681	0.3264	0.384	0.3509	0.3558	0.3141	0.3337	0.3313	0.3215	0.2491	0.1485	0.1276	0.119	0.1644	0.1227	0.2074	0.0908
Fungi_Release38	lichtheimia_corymbifera_jmrc_fsu_9682	A	0.326	0.3001	0.3063	0.3247	0.3272	0.2841	0.31	0.3407	0.2964	0.2841	0.3161	0.3063	0.3063	0.3038	0.2817	0.3014	0.2989	0.3247	0.3112	0.3001	0.3223	0.3358	0.3112	0.3112	0.2927	0.2952	0.2977	0.2903	0.3038	0.2866	0.305	0.3506	0.2903	0.2817	0.3333	0.3456	0.3149	0.2878	0.2485	0.1796	0.2263	0.1931	0.2423	0.2952	0.3014	0.3579	0.6261
Fungi_Release38	lichtheimia_corymbifera_jmrc_fsu_9682	C	0.1279	0.1624	0.1353	0.1451	0.1415	0.1476	0.187	0.1378	0.2005	0.1685	0.1648	0.1525	0.1378	0.1451	0.1476	0.1427	0.1402	0.1267	0.1439	0.1476	0.1611	0.1378	0.1673	0.1697	0.1611	0.1685	0.1673	0.1476	0.1599	0.1587	0.1636	0.1845	0.2165	0.2005	0.1611	0.1279	0.1574	0.1058	0.0923	0.1021	0.0418	0.0357	0.0308	0.0467	0.08	0.091	0.059
Fungi_Release38	lichtheimia_corymbifera_jmrc_fsu_9682	G	0.2448	0.2558	0.2645	0.2657	0.2448	0.2546	0.23	0.246	0.214	0.2411	0.2202	0.2448	0.2325	0.2374	0.2325	0.2509	0.2435	0.2485	0.2558	0.2399	0.2522	0.2116	0.2386	0.23	0.2374	0.2263	0.2042	0.1943	0.1907	0.1857	0.1722	0.139	0.1255	0.1525	0.1734	0.1833	0.2534	0.3038	0.3383	0.4182	0.5646	0.6052	0.5781	0.4317	0.4071	0.3001	0.2116
Fungi_Release38	lichtheimia_corymbifera_jmrc_fsu_9682	T	0.3014	0.2817	0.294	0.2645	0.2866	0.3137	0.2731	0.2755	0.2891	0.3063	0.2989	0.2964	0.3235	0.3137	0.3383	0.305	0.3173	0.3001	0.2891	0.3124	0.2645	0.3149	0.2829	0.2891	0.3087	0.31	0.3309	0.3678	0.3456	0.369	0.3592	0.326	0.3678	0.3653	0.3321	0.3432	0.2743	0.3026	0.321	0.3001	0.1673	0.1661	0.1488	0.2263	0.2116	0.2509	0.1033
Fungi_Release38	lentinula_edodes	A	0.2213	0.2621	0.2423	0.2522	0.2274	0.2485	0.2373	0.2621	0.225	0.2138	0.2188	0.2299	0.2497	0.2583	0.2596	0.2472	0.2546	0.2509	0.2349	0.2621	0.2497	0.2806	0.2571	0.2596	0.2583	0.2719	0.2435	0.2485	0.2497	0.2509	0.246	0.2373	0.2744	0.2756	0.288	0.2855	0.2497	0.2138	0.2299	0.2077	0.2311	0.1978	0.2089	0.2126	0.2361	0.2781	0.4178
Fungi_Release38	lentinula_edodes	C	0.1879	0.199	0.2064	0.2138	0.2002	0.2262	0.2114	0.2262	0.2299	0.2114	0.2336	0.2225	0.2274	0.2101	0.2237	0.2213	0.2336	0.246	0.2138	0.2324	0.2151	0.2015	0.2349	0.1928	0.2311	0.2101	0.2274	0.2213	0.2423	0.2373	0.2336	0.2114	0.1978	0.2274	0.204	0.204	0.1978	0.1904	0.1854	0.1805	0.1286	0.0927	0.0927	0.1026	0.0705	0.1236	0.0964
Fungi_Release38	lentinula_edodes	G	0.2756	0.2386	0.2349	0.1978	0.2213	0.2002	0.2126	0.2101	0.2077	0.2101	0.2361	0.1965	0.1891	0.2225	0.1817	0.2015	0.2114	0.1953	0.22	0.2225	0.2237	0.2114	0.2077	0.2262	0.2151	0.2089	0.2138	0.2237	0.1867	0.1965	0.1965	0.1928	0.1953	0.1619	0.204	0.1978	0.2287	0.2695	0.2868	0.3152	0.4784	0.5365	0.5797	0.5117	0.5612	0.3857	0.377
Fungi_Release38	lentinula_edodes	T	0.3152	0.3004	0.3164	0.3362	0.3511	0.3251	0.3387	0.3016	0.3375	0.3646	0.3115	0.3511	0.3337	0.309	0.335	0.33	0.3004	0.3078	0.3313	0.2831	0.3115	0.3066	0.3004	0.3214	0.2954	0.309	0.3152	0.3066	0.3214	0.3152	0.3239	0.3585	0.3325	0.335	0.3041	0.3127	0.3239	0.3263	0.2979	0.2967	0.1619	0.1731	0.1187	0.1731	0.1323	0.2126	0.1088
Fungi_Release38	chaetomium_globosum_cbs_148_51	A	0.2189	0.1828	0.1978	0.2164	0.1866	0.1915	0.1866	0.2027	0.1978	0.1891	0.2251	0.255	0.2027	0.2425	0.2189	0.2164	0.2127	0.2102	0.2425	0.2289	0.2289	0.2637	0.2351	0.2724	0.2463	0.2214	0.2575	0.2699	0.2351	0.2239	0.2525	0.2214	0.245	0.2662	0.2537	0.26	0.2624	0.2711	0.2711	0.1654	0.1891	0.1878	0.1716	0.1828	0.2002	0.2649	0.3968
Fungi_Release38	chaetomium_globosum_cbs_148_51	C	0.2326	0.2338	0.2662	0.2724	0.2649	0.2363	0.2736	0.25	0.2699	0.2786	0.2687	0.2226	0.2301	0.2537	0.2425	0.2575	0.2587	0.2239	0.245	0.2338	0.2052	0.2152	0.2226	0.1828	0.2251	0.2313	0.2463	0.2065	0.255	0.2351	0.2251	0.2289	0.2289	0.2214	0.2388	0.2338	0.2388	0.2102	0.1841	0.2388	0.1455	0.1418	0.0958	0.1119	0.1231	0.1107	0.1157
Fungi_Release38	chaetomium_globosum_cbs_148_51	G	0.2898	0.2998	0.296	0.2799	0.3147	0.296	0.2674	0.3122	0.2998	0.2662	0.2575	0.2749	0.2973	0.2736	0.291	0.2923	0.2873	0.3221	0.2699	0.3085	0.3371	0.2898	0.3172	0.3022	0.2774	0.3085	0.2786	0.2786	0.3134	0.3109	0.2736	0.2861	0.2537	0.25	0.24	0.2438	0.2724	0.2724	0.3296	0.3905	0.5261	0.5485	0.5709	0.5572	0.5597	0.4639	0.4179
Fungi_Release38	chaetomium_globosum_cbs_148_51	T	0.2587	0.2836	0.24	0.2313	0.2338	0.2761	0.2724	0.2351	0.2326	0.2662	0.2488	0.2475	0.2699	0.2301	0.2475	0.2338	0.2413	0.2438	0.2425	0.2289	0.2289	0.2313	0.2251	0.2425	0.2512	0.2388	0.2177	0.245	0.1965	0.2301	0.2488	0.2637	0.2724	0.2624	0.2674	0.2624	0.2264	0.2463	0.2152	0.2052	0.1393	0.1219	0.1617	0.148	0.1169	0.1604	0.0697
Fungi_Release38	rhizopogon_vinicolor_am_or11_026	A	0.264	0.2466	0.2229	0.2379	0.2354	0.2291	0.2105	0.2154	0.1993	0.2179	0.2316	0.2192	0.2017	0.254	0.2329	0.2316	0.2055	0.2503	0.2192	0.2316	0.2192	0.2453	0.2391	0.2391	0.2453	0.2204	0.259	0.2578	0.2391	0.2416	0.2491	0.2565	0.2428	0.279	0.2578	0.2615	0.2391	0.2702	0.2366	0.2167	0.2017	0.1719	0.1719	0.213	0.2242	0.2055	0.3686
Fungi_Release38	rhizopogon_vinicolor_am_or11_026	C	0.1619	0.1793	0.1631	0.1719	0.208	0.2067	0.2242	0.2304	0.2665	0.259	0.2217	0.2441	0.254	0.2366	0.2366	0.2366	0.2516	0.2416	0.2665	0.2379	0.2204	0.2516	0.1731	0.2242	0.2229	0.2279	0.208	0.2192	0.213	0.2615	0.2254	0.1943	0.2403	0.2092	0.2466	0.193	0.2267	0.1606	0.2167	0.1743	0.1158	0.0984	0.0922	0.1059	0.1196	0.1507	0.1021
Fungi_Release38	rhizopogon_vinicolor_am_or11_026	G	0.2989	0.2964	0.2802	0.2441	0.254	0.2254	0.2105	0.1868	0.198	0.1818	0.1781	0.1918	0.1893	0.1756	0.1843	0.1731	0.1631	0.1893	0.1868	0.2192	0.2242	0.1943	0.2304	0.2291	0.2391	0.2403	0.2179	0.2167	0.2291	0.2117	0.203	0.1943	0.2067	0.1768	0.1706	0.198	0.2042	0.259	0.2715	0.3225	0.5143	0.5928	0.5965	0.4919	0.528	0.4259	0.4408
Fungi_Release38	rhizopogon_vinicolor_am_or11_026	T	0.2752	0.2777	0.3337	0.3462	0.3026	0.3387	0.3549	0.3674	0.3362	0.3412	0.3686	0.345	0.3549	0.3337	0.3462	0.3587	0.3798	0.3188	0.3275	0.3113	0.3362	0.3088	0.3574	0.3076	0.2927	0.3113	0.3151	0.3064	0.3188	0.2852	0.3225	0.3549	0.3101	0.335	0.325	0.3474	0.33	0.3101	0.2752	0.2864	0.1681	0.137	0.1395	0.1893	0.1283	0.2179	0.0884
Fungi_Release38	xanthophyllomyces_dendrorhous	A	0.2372	0.2709	0.2647	0.2547	0.2534	0.2247	0.2185	0.2222	0.226	0.2397	0.236	0.2085	0.2235	0.2285	0.236	0.216	0.2097	0.206	0.206	0.2122	0.216	0.2047	0.2122	0.1873	0.1735	0.2085	0.1923	0.1873	0.1973	0.1948	0.1848	0.1785	0.1773	0.181	0.1948	0.1598	0.1436	0.1261	0.1273	0.1136	0.1473	0.1773	0.2734	0.3121	0.412	0.4532	0.5993
Fungi_Release38	xanthophyllomyces_dendrorhous	C	0.2372	0.2222	0.2135	0.2322	0.2385	0.211	0.2447	0.2459	0.2285	0.2385	0.2197	0.226	0.2247	0.2297	0.1898	0.2659	0.2609	0.2322	0.2609	0.2247	0.2297	0.2147	0.201	0.2447	0.2372	0.2422	0.211	0.2559	0.2222	0.2185	0.2185	0.1985	0.2097	0.2197	0.2135	0.221	0.2172	0.1698	0.1536	0.1561	0.0811	0.0699	0.0599	0.1236	0.1099	0.1174	0.0774
Fungi_Release38	xanthophyllomyces_dendrorhous	G	0.2135	0.1923	0.2035	0.2122	0.1748	0.206	0.1798	0.2035	0.2285	0.2097	0.1848	0.196	0.2097	0.171	0.201	0.1635	0.171	0.2022	0.1773	0.1835	0.186	0.1998	0.1948	0.1748	0.171	0.1548	0.1835	0.191	0.1873	0.1823	0.1648	0.2185	0.2097	0.2285	0.1885	0.221	0.2697	0.3358	0.3783	0.4856	0.6417	0.6429	0.5418	0.372	0.3433	0.2172	0.2335
Fungi_Release38	xanthophyllomyces_dendrorhous	T	0.3121	0.3146	0.3184	0.3009	0.3333	0.3583	0.3571	0.3283	0.3171	0.3121	0.3596	0.3695	0.3421	0.3708	0.3733	0.3546	0.3583	0.3596	0.3558	0.3795	0.3683	0.3808	0.392	0.3933	0.4182	0.3945	0.4132	0.3658	0.3933	0.4045	0.432	0.4045	0.4032	0.3708	0.4032	0.3983	0.3695	0.3683	0.3408	0.2447	0.1298	0.1099	0.1248	0.1923	0.1348	0.2122	0.0899
Fungi_Release38	cryptococcus_depauperatus_cbs_7841	A	0.2494	0.2469	0.2419	0.2431	0.2256	0.2231	0.2481	0.2368	0.2318	0.2093	0.2143	0.2293	0.2068	0.2193	0.2644	0.2381	0.2431	0.2368	0.2644	0.2594	0.2381	0.2794	0.2669	0.2669	0.3233	0.2632	0.2657	0.2744	0.2957	0.297	0.2544	0.2832	0.2757	0.2444	0.2281	0.2105	0.2456	0.317	0.3521	0.2895	0.2657	0.2632	0.1767	0.1566	0.1817	0.213	0.3935
Fungi_Release38	cryptococcus_depauperatus_cbs_7841	C	0.1554	0.1516	0.1679	0.1504	0.1366	0.1717	0.1454	0.1479	0.1842	0.1942	0.1942	0.1729	0.1805	0.203	0.1779	0.188	0.1792	0.1855	0.1779	0.1692	0.193	0.1779	0.1754	0.1779	0.1692	0.1566	0.1754	0.1729	0.1378	0.1479	0.2143	0.1704	0.1779	0.183	0.2268	0.2293	0.1905	0.1491	0.1491	0.1892	0.1391	0.0627	0.0827	0.0865	0.0576	0.0915	0.0915
Fungi_Release38	cryptococcus_depauperatus_cbs_7841	G	0.2807	0.2857	0.2895	0.302	0.302	0.2769	0.2669	0.2732	0.2519	0.2381	0.2544	0.2519	0.2669	0.2769	0.2343	0.2431	0.2481	0.2506	0.2293	0.2907	0.2719	0.2444	0.2782	0.2882	0.2519	0.2932	0.2632	0.3083	0.2732	0.2757	0.2682	0.2644	0.2669	0.2794	0.2807	0.2469	0.2444	0.2481	0.2581	0.2419	0.4198	0.5	0.5902	0.599	0.6328	0.5013	0.406
Fungi_Release38	cryptococcus_depauperatus_cbs_7841	T	0.3145	0.3158	0.3008	0.3045	0.3358	0.3283	0.3396	0.3421	0.3321	0.3584	0.3371	0.3459	0.3459	0.3008	0.3233	0.3308	0.3296	0.3271	0.3283	0.2807	0.297	0.2982	0.2794	0.2669	0.2556	0.287	0.2957	0.2444	0.2932	0.2794	0.2632	0.282	0.2794	0.2932	0.2644	0.3133	0.3195	0.2857	0.2406	0.2794	0.1754	0.1742	0.1504	0.1579	0.1278	0.1942	0.109
Fungi_Release38	suillus_luteus_uh_slu_lm8_n1	A	0.2093	0.2068	0.2156	0.2661	0.2207	0.2333	0.2182	0.2308	0.1992	0.2144	0.2043	0.1942	0.2434	0.2509	0.227	0.2396	0.2119	0.2333	0.2207	0.2383	0.2535	0.2409	0.2421	0.2547	0.2636	0.2484	0.2724	0.2585	0.2509	0.2446	0.2699	0.2585	0.2497	0.261	0.2573	0.2295	0.2787	0.3153	0.285	0.203	0.1967	0.1791	0.174	0.1854	0.227	0.2156	0.3619
Fungi_Release38	suillus_luteus_uh_slu_lm8_n1	C	0.1942	0.1677	0.1702	0.1854	0.2043	0.1917	0.1967	0.2043	0.2371	0.2409	0.2232	0.2308	0.2396	0.2219	0.2623	0.2724	0.2509	0.2169	0.2144	0.2421	0.1904	0.227	0.1917	0.2081	0.2068	0.203	0.2282	0.2194	0.2421	0.2383	0.2043	0.2093	0.2106	0.2081	0.232	0.2383	0.1904	0.1753	0.2055	0.1967	0.1248	0.0933	0.0921	0.1047	0.0845	0.1311	0.1072
Fungi_Release38	suillus_luteus_uh_slu_lm8_n1	G	0.2951	0.2888	0.2497	0.2194	0.2724	0.2509	0.1967	0.2043	0.1967	0.1866	0.2093	0.2005	0.1652	0.1942	0.1929	0.1639	0.1778	0.2182	0.1992	0.1992	0.2182	0.2081	0.2396	0.232	0.2333	0.2207	0.2131	0.203	0.1929	0.2194	0.1892	0.2018	0.2068	0.1866	0.1828	0.169	0.203	0.2245	0.2383	0.3165	0.4981	0.5599	0.5914	0.5221	0.5662	0.4338	0.4262
Fungi_Release38	suillus_luteus_uh_slu_lm8_n1	T	0.3014	0.3367	0.3644	0.3291	0.3026	0.3241	0.3884	0.3607	0.367	0.3581	0.3632	0.3745	0.3518	0.3329	0.3178	0.3241	0.3594	0.3317	0.3657	0.3203	0.338	0.3241	0.3266	0.3052	0.2963	0.3279	0.2863	0.319	0.314	0.2976	0.3367	0.3304	0.3329	0.3443	0.3279	0.3632	0.3279	0.285	0.2711	0.2837	0.1803	0.1677	0.1425	0.1879	0.1223	0.2194	0.1047
Fungi_Release38	aspergillus_aculeatus_atcc_16872	A	0.2311	0.1982	0.1818	0.1843	0.1869	0.2045	0.2096	0.2159	0.197	0.1831	0.2134	0.221	0.2172	0.2336	0.2412	0.25	0.2513	0.202	0.2386	0.2664	0.2551	0.2386	0.2715	0.2538	0.2551	0.2513	0.279	0.274	0.2828	0.2639	0.2664	0.2311	0.2626	0.2614	0.2551	0.2626	0.2689	0.2336	0.2146	0.1818	0.2045	0.1894	0.173	0.1894	0.2159	0.2854	0.4558
Fungi_Release38	aspergillus_aculeatus_atcc_16872	C	0.2854	0.2702	0.2765	0.2626	0.2664	0.2551	0.3043	0.2689	0.2866	0.2727	0.2778	0.2576	0.2765	0.2323	0.2563	0.2576	0.2412	0.2437	0.2374	0.226	0.2336	0.2449	0.2399	0.2273	0.2298	0.2197	0.2184	0.2424	0.2298	0.2374	0.2462	0.2424	0.2538	0.25	0.2475	0.2525	0.1818	0.2298	0.1932	0.1957	0.1376	0.1023	0.0909	0.0808	0.0808	0.0997	0.0871
Fungi_Release38	aspergillus_aculeatus_atcc_16872	G	0.2121	0.2462	0.2298	0.2311	0.25	0.2487	0.2159	0.25	0.2475	0.2525	0.2159	0.2424	0.2513	0.2677	0.2462	0.2348	0.2323	0.2803	0.2449	0.2588	0.2576	0.2677	0.2513	0.2753	0.2803	0.2538	0.2184	0.2361	0.2172	0.2449	0.2273	0.2285	0.2298	0.1995	0.1944	0.2071	0.25	0.2917	0.3131	0.4053	0.5038	0.572	0.6225	0.6048	0.577	0.4091	0.3624
Fungi_Release38	aspergillus_aculeatus_atcc_16872	T	0.2715	0.2854	0.3119	0.322	0.2967	0.2917	0.2702	0.2652	0.2689	0.2917	0.2929	0.279	0.2551	0.2664	0.2563	0.2576	0.2753	0.274	0.279	0.2487	0.2538	0.2487	0.2374	0.2437	0.2348	0.2753	0.2841	0.2475	0.2702	0.2538	0.2601	0.298	0.2538	0.2891	0.303	0.2778	0.2992	0.2449	0.279	0.2172	0.154	0.1364	0.1136	0.125	0.1263	0.2058	0.0947
Fungi_Release38	dichomitus_squalens_lyad_421_ss1	A	0.1729	0.1961	0.1935	0.2039	0.1652	0.1768	0.1935	0.1716	0.1845	0.2065	0.1948	0.1858	0.1819	0.1845	0.2245	0.2194	0.2065	0.1897	0.1871	0.231	0.2232	0.2052	0.1884	0.2116	0.2026	0.2168	0.2155	0.2194	0.209	0.2245	0.2258	0.2284	0.2219	0.1819	0.2	0.1987	0.2155	0.2	0.2077	0.1226	0.16	0.1187	0.1729	0.1729	0.191	0.1806	0.3394
Fungi_Release38	dichomitus_squalens_lyad_421_ss1	C	0.271	0.271	0.2284	0.2619	0.2813	0.2903	0.3058	0.2606	0.2955	0.2813	0.2852	0.2929	0.2761	0.271	0.2529	0.2594	0.2671	0.28	0.2903	0.271	0.2452	0.2645	0.2516	0.249	0.2865	0.2452	0.2865	0.2542	0.2684	0.2348	0.271	0.2465	0.2426	0.2619	0.271	0.2542	0.2426	0.2529	0.2168	0.2245	0.1445	0.1135	0.0903	0.1652	0.1123	0.1665	0.0735
Fungi_Release38	dichomitus_squalens_lyad_421_ss1	G	0.2787	0.2813	0.2206	0.2426	0.2645	0.2619	0.2168	0.2684	0.2335	0.2439	0.2361	0.2542	0.2606	0.2813	0.2452	0.2942	0.2671	0.271	0.2813	0.2465	0.2477	0.2697	0.2865	0.2929	0.2684	0.2761	0.2555	0.28	0.2323	0.2632	0.2413	0.2374	0.2284	0.2697	0.2477	0.2658	0.2748	0.2839	0.3226	0.3897	0.5561	0.6426	0.6335	0.5135	0.5742	0.4413	0.52
Fungi_Release38	dichomitus_squalens_lyad_421_ss1	T	0.2774	0.2516	0.3574	0.2916	0.289	0.271	0.2839	0.2994	0.2865	0.2684	0.2839	0.2671	0.2813	0.2632	0.2774	0.2271	0.2594	0.2594	0.2413	0.2516	0.2839	0.2606	0.2735	0.2465	0.2426	0.2619	0.2426	0.2465	0.2903	0.2774	0.2619	0.2877	0.3071	0.2865	0.2813	0.2813	0.2671	0.2632	0.2529	0.2632	0.1394	0.1252	0.1032	0.1484	0.1226	0.2116	0.0671
Fungi_Release38	cryptococcus_gattii_e566	A	0.2332	0.2306	0.2396	0.2655	0.2241	0.2241	0.228	0.2461	0.215	0.2332	0.2358	0.2345	0.2655	0.263	0.2228	0.2617	0.2591	0.2487	0.2863	0.2694	0.2889	0.285	0.285	0.307	0.3161	0.2824	0.2837	0.3355	0.3199	0.3018	0.2772	0.2837	0.2681	0.2526	0.2565	0.2759	0.2889	0.2733	0.2798	0.1956	0.2111	0.1969	0.2008	0.2215	0.2668	0.3083	0.4767
Fungi_Release38	cryptococcus_gattii_e566	C	0.2034	0.1736	0.2254	0.1852	0.1995	0.2163	0.2319	0.2241	0.2021	0.2085	0.2358	0.2111	0.2189	0.1943	0.2034	0.1891	0.1826	0.2047	0.1775	0.1969	0.1826	0.1697	0.158	0.1684	0.1658	0.1917	0.1917	0.1723	0.1839	0.1891	0.193	0.1917	0.1956	0.2111	0.2202	0.1878	0.1528	0.1684	0.1516	0.1503	0.0894	0.0829	0.0622	0.0712	0.0803	0.0959	0.0609
Fungi_Release38	cryptococcus_gattii_e566	G	0.2591	0.2409	0.2124	0.2098	0.2241	0.1852	0.2111	0.1736	0.2189	0.2098	0.2124	0.2163	0.2085	0.2202	0.2228	0.2202	0.2189	0.2319	0.2448	0.2176	0.2202	0.2526	0.2487	0.272	0.2552	0.2694	0.2552	0.2202	0.2098	0.2345	0.2422	0.2668	0.2526	0.2319	0.2267	0.2526	0.263	0.2655	0.3031	0.3731	0.5181	0.5738	0.6114	0.5363	0.5155	0.3873	0.3472
Fungi_Release38	cryptococcus_gattii_e566	T	0.3044	0.3549	0.3225	0.3394	0.3523	0.3744	0.329	0.3562	0.364	0.3484	0.3161	0.3381	0.307	0.3225	0.351	0.329	0.3394	0.3148	0.2915	0.3161	0.3083	0.2927	0.3083	0.2526	0.263	0.2565	0.2694	0.272	0.2863	0.2746	0.2876	0.2578	0.2837	0.3044	0.2966	0.2837	0.2953	0.2927	0.2655	0.2811	0.1813	0.1464	0.1256	0.171	0.1373	0.2085	0.1153
Fungi_Release38	serendipita_indica_dsm_11827	A	0.2383	0.2215	0.2111	0.1852	0.2111	0.2202	0.206	0.2215	0.2073	0.206	0.2124	0.2137	0.1891	0.2163	0.2111	0.1943	0.2241	0.2332	0.2176	0.2358	0.2396	0.2513	0.2241	0.2189	0.2422	0.2539	0.2655	0.2396	0.2655	0.2409	0.2306	0.228	0.2668	0.25	0.2215	0.2267	0.2578	0.3161	0.3834	0.2798	0.2681	0.1749	0.1528	0.1593	0.1826	0.2215	0.4598
Fungi_Release38	serendipita_indica_dsm_11827	C	0.1891	0.1943	0.171	0.1852	0.1788	0.1541	0.1904	0.2111	0.2098	0.2254	0.2655	0.2396	0.2785	0.2565	0.2487	0.2707	0.2642	0.2306	0.237	0.2513	0.2383	0.2332	0.2448	0.2306	0.2202	0.2176	0.1982	0.2034	0.2358	0.2319	0.2332	0.215	0.2021	0.2073	0.2526	0.2927	0.2202	0.2124	0.2137	0.2422	0.1671	0.1295	0.0803	0.0674	0.0972	0.1062	0.1062
Fungi_Release38	serendipita_indica_dsm_11827	G	0.3057	0.3407	0.3303	0.3523	0.2992	0.3277	0.2617	0.2604	0.2422	0.2228	0.171	0.1995	0.2047	0.1943	0.1891	0.1852	0.1891	0.1995	0.2202	0.2189	0.2306	0.2267	0.2241	0.2422	0.2604	0.2345	0.2345	0.2409	0.2332	0.2176	0.2332	0.2474	0.2332	0.1865	0.2202	0.1528	0.1477	0.1995	0.1917	0.2513	0.4158	0.5544	0.649	0.6179	0.6244	0.4404	0.3692
Fungi_Release38	serendipita_indica_dsm_11827	T	0.2668	0.2435	0.2876	0.2772	0.3109	0.2979	0.342	0.307	0.3407	0.3459	0.351	0.3472	0.3277	0.3329	0.351	0.3497	0.3225	0.3368	0.3251	0.294	0.2915	0.2889	0.307	0.3083	0.2772	0.294	0.3018	0.3161	0.2655	0.3096	0.3031	0.3096	0.2979	0.3562	0.3057	0.3277	0.3744	0.272	0.2111	0.2267	0.149	0.1412	0.1179	0.1554	0.0959	0.2319	0.0648
Fungi_Release38	cryptococcus_gattii_ru294	A	0.2283	0.2179	0.2438	0.2633	0.2283	0.2283	0.2283	0.2438	0.2166	0.2399	0.2451	0.2399	0.2594	0.2594	0.2257	0.2594	0.2594	0.2542	0.2879	0.2711	0.2815	0.2918	0.2996	0.3035	0.3256	0.2763	0.284	0.345	0.3113	0.2918	0.2931	0.2789	0.2711	0.2503	0.249	0.2711	0.2918	0.2724	0.2853	0.1907	0.2205	0.1907	0.2036	0.227	0.2646	0.3178	0.4734
Fungi_Release38	cryptococcus_gattii_ru294	C	0.201	0.1855	0.214	0.1829	0.1971	0.2192	0.2361	0.214	0.192	0.2023	0.2296	0.2062	0.2062	0.1946	0.2049	0.1829	0.1816	0.2023	0.1764	0.2049	0.1803	0.1621	0.1479	0.1595	0.1647	0.1946	0.1881	0.1751	0.179	0.1855	0.192	0.1946	0.1907	0.2166	0.227	0.1907	0.144	0.1673	0.153	0.1492	0.0869	0.0817	0.0584	0.0739	0.0804	0.0986	0.0597
Fungi_Release38	cryptococcus_gattii_ru294	G	0.2477	0.2425	0.2244	0.2114	0.2166	0.1764	0.2075	0.1803	0.2192	0.2062	0.2049	0.2283	0.2127	0.2192	0.2205	0.2309	0.2205	0.2309	0.2438	0.2036	0.2322	0.2516	0.2399	0.2763	0.249	0.2659	0.2529	0.2127	0.2179	0.2425	0.2387	0.2594	0.2516	0.2296	0.2283	0.2568	0.275	0.2698	0.297	0.3813	0.5149	0.5811	0.6148	0.5266	0.5162	0.3748	0.3476
Fungi_Release38	cryptococcus_gattii_ru294	T	0.323	0.3541	0.3178	0.3424	0.358	0.3761	0.3281	0.3619	0.3722	0.3515	0.3204	0.3256	0.3217	0.3268	0.3489	0.3268	0.3385	0.3126	0.2918	0.3204	0.3061	0.2944	0.3126	0.2607	0.2607	0.2633	0.275	0.2672	0.2918	0.2802	0.2763	0.2672	0.2866	0.3035	0.2957	0.2815	0.2892	0.2905	0.2646	0.2789	0.1777	0.1466	0.1232	0.1725	0.1388	0.2088	0.1193
Fungi_Release38	cryptococcus_gattii_wm276	A	0.2328	0.2315	0.2328	0.2679	0.2211	0.2328	0.2289	0.2458	0.212	0.2367	0.2432	0.2354	0.2653	0.2575	0.2224	0.2575	0.2588	0.251	0.2848	0.2692	0.2822	0.2887	0.2835	0.3017	0.3212	0.2809	0.2874	0.3342	0.3147	0.3004	0.2783	0.2835	0.2627	0.2536	0.251	0.277	0.2887	0.2757	0.2796	0.1964	0.2107	0.1964	0.1977	0.2198	0.2666	0.3121	0.4759
Fungi_Release38	cryptococcus_gattii_wm276	C	0.1977	0.1743	0.2211	0.186	0.2029	0.2185	0.225	0.2237	0.2016	0.2055	0.238	0.212	0.2146	0.1925	0.2081	0.1873	0.1847	0.2068	0.1756	0.2055	0.1847	0.1717	0.1547	0.1717	0.1678	0.1951	0.1964	0.1743	0.1886	0.1886	0.199	0.1912	0.1951	0.2094	0.2198	0.1886	0.1495	0.1704	0.1534	0.1469	0.0845	0.0819	0.0598	0.0741	0.0793	0.0962	0.0624
Fungi_Release38	cryptococcus_gattii_wm276	G	0.2627	0.2419	0.2211	0.2029	0.2237	0.1795	0.2159	0.1769	0.2146	0.2133	0.212	0.2094	0.2094	0.2224	0.2211	0.225	0.2159	0.2263	0.2445	0.2094	0.2276	0.2419	0.2471	0.2718	0.2523	0.2692	0.2523	0.2185	0.2081	0.2393	0.2432	0.264	0.2588	0.238	0.2315	0.2536	0.2705	0.2679	0.3069	0.3758	0.5254	0.5748	0.6138	0.5332	0.5124	0.3849	0.3446
Fungi_Release38	cryptococcus_gattii_wm276	T	0.3069	0.3524	0.3251	0.3433	0.3524	0.3693	0.3303	0.3537	0.3719	0.3446	0.3069	0.3433	0.3108	0.3277	0.3485	0.3303	0.3407	0.316	0.2952	0.316	0.3056	0.2978	0.3147	0.2549	0.2588	0.2549	0.264	0.2731	0.2887	0.2718	0.2796	0.2614	0.2835	0.2991	0.2978	0.2809	0.2913	0.2861	0.2601	0.2809	0.1795	0.1469	0.1287	0.173	0.1417	0.2068	0.117
Fungi_Release38	schizopora_paradoxa	A	0.2396	0.2292	0.2383	0.1953	0.2018	0.2188	0.2214	0.2253	0.2344	0.2344	0.2396	0.2565	0.2461	0.2331	0.224	0.2513	0.2435	0.25	0.2552	0.2305	0.2552	0.2565	0.2565	0.2383	0.2474	0.2487	0.2422	0.2643	0.2422	0.2565	0.2552	0.2591	0.2461	0.2656	0.2982	0.2552	0.2708	0.2812	0.2474	0.1797	0.1901	0.1836	0.2135	0.224	0.2409	0.2487	0.3984
Fungi_Release38	schizopora_paradoxa	C	0.2031	0.1771	0.1849	0.2435	0.2266	0.2214	0.2383	0.2161	0.2422	0.2409	0.2318	0.237	0.2253	0.2305	0.2318	0.1953	0.2474	0.2109	0.2005	0.237	0.2174	0.2435	0.2109	0.2292	0.2357	0.2083	0.2409	0.2188	0.2109	0.2266	0.2148	0.1927	0.207	0.2057	0.2344	0.207	0.1901	0.1888	0.1784	0.1758	0.1172	0.1016	0.0938	0.1302	0.0977	0.1432	0.0729
Fungi_Release38	schizopora_paradoxa	G	0.2617	0.2656	0.2526	0.2357	0.2227	0.207	0.1862	0.2096	0.1979	0.1836	0.181	0.1745	0.1732	0.1901	0.1901	0.2031	0.1745	0.1914	0.2057	0.1927	0.1953	0.1992	0.1979	0.1901	0.2214	0.207	0.194	0.2161	0.2292	0.1888	0.1823	0.1979	0.1979	0.1836	0.1719	0.2135	0.2279	0.25	0.276	0.3542	0.5286	0.5586	0.5599	0.4688	0.5339	0.4102	0.4323
Fungi_Release38	schizopora_paradoxa	T	0.2956	0.3281	0.3242	0.3255	0.349	0.3529	0.3542	0.349	0.3255	0.3411	0.3477	0.332	0.3555	0.3464	0.3542	0.3503	0.3346	0.3477	0.3385	0.3398	0.332	0.3008	0.3346	0.3424	0.2956	0.3359	0.3229	0.3008	0.3177	0.3281	0.3477	0.3503	0.349	0.3451	0.2956	0.3242	0.3112	0.2799	0.2982	0.2904	0.1641	0.1562	0.1328	0.1771	0.1276	0.1979	0.0964
Fungi_Release38	hebeloma_cylindrosporum_h7	A	0.2382	0.2003	0.2081	0.2199	0.2042	0.2081	0.2277	0.2042	0.212	0.2107	0.2291	0.2016	0.2055	0.2474	0.2199	0.2251	0.2343	0.2186	0.2435	0.2565	0.2618	0.2186	0.2709	0.2369	0.2513	0.2683	0.2866	0.2435	0.2291	0.2539	0.2513	0.2788	0.2513	0.2696	0.2723	0.2709	0.2736	0.2709	0.2513	0.1741	0.2068	0.1924	0.1963	0.216	0.2395	0.2814	0.4503
Fungi_Release38	hebeloma_cylindrosporum_h7	C	0.199	0.1963	0.2225	0.2134	0.2291	0.2552	0.216	0.2291	0.267	0.2605	0.2186	0.2618	0.2552	0.2513	0.2238	0.2408	0.2618	0.2264	0.2408	0.2094	0.2173	0.2356	0.2029	0.2107	0.2382	0.2081	0.2199	0.2212	0.2395	0.2107	0.2291	0.2173	0.2277	0.2173	0.216	0.2225	0.1846	0.2068	0.1924	0.1872	0.1021	0.0759	0.0772	0.0916	0.0982	0.1099	0.0942
Fungi_Release38	hebeloma_cylindrosporum_h7	G	0.2605	0.2461	0.2251	0.2212	0.2107	0.2003	0.1754	0.1793	0.1662	0.1545	0.1819	0.1597	0.1872	0.1806	0.1911	0.1597	0.1754	0.1911	0.2016	0.2029	0.2042	0.2003	0.2173	0.2212	0.2094	0.2081	0.1885	0.1767	0.1976	0.2029	0.178	0.1898	0.1872	0.1885	0.1715	0.1819	0.2264	0.2369	0.2487	0.3377	0.5065	0.5969	0.5916	0.517	0.5196	0.3966	0.3573
Fungi_Release38	hebeloma_cylindrosporum_h7	T	0.3024	0.3573	0.3442	0.3455	0.356	0.3364	0.3809	0.3874	0.3547	0.3743	0.3704	0.377	0.3521	0.3207	0.3652	0.3743	0.3285	0.3639	0.3141	0.3312	0.3168	0.3455	0.3089	0.3312	0.301	0.3154	0.305	0.3586	0.3338	0.3325	0.3416	0.3141	0.3338	0.3246	0.3403	0.3246	0.3154	0.2853	0.3076	0.301	0.1846	0.1348	0.1348	0.1754	0.1427	0.212	0.0982
Fungi_Release38	cryptococcus_gattii_nt_10	A	0.2307	0.228	0.2412	0.27	0.2215	0.2228	0.2267	0.2477	0.2136	0.2346	0.2385	0.2385	0.2608	0.2569	0.2202	0.2595	0.2634	0.2516	0.2831	0.2687	0.2896	0.2923	0.291	0.3014	0.3159	0.2818	0.2857	0.3381	0.3172	0.3041	0.2779	0.2831	0.2687	0.2543	0.2503	0.2765	0.2883	0.2713	0.2752	0.1927	0.2123	0.1992	0.1992	0.2202	0.2674	0.3106	0.4705
Fungi_Release38	cryptococcus_gattii_nt_10	C	0.1966	0.1782	0.2228	0.1861	0.1979	0.2149	0.228	0.2267	0.2005	0.2058	0.2294	0.2084	0.2136	0.1953	0.2097	0.1848	0.1861	0.2045	0.1796	0.1992	0.1822	0.173	0.156	0.1743	0.1612	0.19	0.19	0.173	0.1861	0.1874	0.1953	0.1913	0.1927	0.2084	0.2228	0.1874	0.1533	0.1691	0.1494	0.1455	0.0891	0.0813	0.059	0.0747	0.0799	0.0957	0.0616
Fungi_Release38	cryptococcus_gattii_nt_10	G	0.2661	0.2451	0.2176	0.2005	0.2294	0.1861	0.2123	0.1704	0.2163	0.2084	0.2136	0.2163	0.2136	0.2215	0.2189	0.2254	0.2097	0.2307	0.2425	0.2149	0.2267	0.2438	0.2398	0.2752	0.2595	0.2713	0.2556	0.2202	0.2084	0.2372	0.2438	0.2647	0.2582	0.2346	0.2267	0.2503	0.2674	0.2661	0.308	0.3788	0.519	0.5714	0.616	0.5321	0.5177	0.3801	0.3486
Fungi_Release38	cryptococcus_gattii_nt_10	T	0.3067	0.3486	0.3185	0.3434	0.3512	0.3761	0.3329	0.3552	0.3696	0.3512	0.3185	0.3368	0.3119	0.3263	0.3512	0.3303	0.3408	0.3132	0.2949	0.3172	0.3014	0.291	0.3132	0.249	0.2634	0.2569	0.2687	0.2687	0.2883	0.2713	0.2831	0.2608	0.2805	0.3028	0.3001	0.2857	0.291	0.2936	0.2674	0.2831	0.1796	0.1481	0.1258	0.173	0.135	0.2136	0.1193
Fungi_Release38	cryptococcus_neoformans	A	0.2116	0.1919	0.2365	0.2326	0.2405	0.2168	0.2116	0.2208	0.2444	0.2208	0.2352	0.2444	0.2576	0.2707	0.2313	0.2247	0.2576	0.2681	0.247	0.247	0.2943	0.2641	0.2943	0.3022	0.2943	0.3141	0.3049	0.3219	0.2865	0.3035	0.2852	0.2891	0.2641	0.2812	0.2549	0.2602	0.2602	0.3167	0.297	0.2168	0.2221	0.1892	0.2234	0.2313	0.2562	0.3469	0.452
Fungi_Release38	cryptococcus_neoformans	C	0.1695	0.2011	0.1866	0.2037	0.1748	0.2155	0.2286	0.2089	0.2221	0.2247	0.2129	0.205	0.2208	0.2076	0.1971	0.2102	0.1669	0.2063	0.2102	0.1945	0.2011	0.1827	0.18	0.1551	0.1721	0.1892	0.1603	0.1656	0.184	0.2194	0.1827	0.1919	0.2142	0.2076	0.2234	0.2089	0.1708	0.1603	0.1774	0.1774	0.1078	0.0894	0.0631	0.0894	0.0657	0.1051	0.0749
Fungi_Release38	cryptococcus_neoformans	G	0.3127	0.2392	0.2562	0.2155	0.2536	0.1984	0.2168	0.2339	0.1997	0.2142	0.2089	0.2102	0.1892	0.1945	0.2037	0.2116	0.2194	0.247	0.2313	0.251	0.2221	0.2668	0.2668	0.2878	0.2562	0.2444	0.2628	0.2628	0.2418	0.2392	0.2628	0.2457	0.251	0.2339	0.2339	0.2181	0.2549	0.276	0.2654	0.3614	0.5125	0.6097	0.5966	0.5033	0.5309	0.3693	0.3561
Fungi_Release38	cryptococcus_neoformans	T	0.3062	0.3679	0.3206	0.3482	0.3311	0.3693	0.343	0.3364	0.3338	0.3403	0.343	0.3403	0.3325	0.3272	0.3679	0.3535	0.3561	0.2786	0.3114	0.3075	0.2825	0.2865	0.2589	0.2549	0.2773	0.2523	0.272	0.2497	0.2878	0.2378	0.2694	0.2733	0.2707	0.2773	0.2878	0.3127	0.3141	0.247	0.2602	0.2444	0.1577	0.1117	0.117	0.1761	0.1472	0.1787	0.117
Fungi_Release38	cylindrobasidium_torrendii_fp15055_ss_10	A	0.1858	0.1739	0.1779	0.1924	0.1581	0.1726	0.1858	0.1779	0.1607	0.1594	0.2016	0.1739	0.1726	0.1845	0.2095	0.2042	0.2055	0.2161	0.2029	0.2227	0.1937	0.2174	0.22	0.2253	0.2464	0.2345	0.2596	0.2503	0.249	0.2622	0.2372	0.2227	0.2332	0.1805	0.22	0.2358	0.2925	0.303	0.3188	0.2069	0.2358	0.1937	0.1752	0.1726	0.1818	0.1713	0.4111
Fungi_Release38	cylindrobasidium_torrendii_fp15055_ss_10	C	0.2016	0.1963	0.1845	0.1963	0.2292	0.2437	0.249	0.2806	0.2516	0.2833	0.278	0.3004	0.2661	0.2714	0.2793	0.2661	0.2569	0.2648	0.2912	0.2385	0.2609	0.2477	0.2358	0.2213	0.2819	0.2253	0.2398	0.2437	0.2516	0.2516	0.2319	0.2292	0.2372	0.2609	0.2477	0.2859	0.2095	0.2134	0.2108	0.2385	0.1357	0.1212	0.0856	0.1173	0.0725	0.1673	0.0711
Fungi_Release38	cylindrobasidium_torrendii_fp15055_ss_10	G	0.336	0.3333	0.3267	0.2899	0.2991	0.2688	0.2503	0.2055	0.2174	0.191	0.1752	0.1976	0.2069	0.1871	0.1568	0.1831	0.2121	0.2134	0.2082	0.2213	0.2411	0.2345	0.2385	0.2556	0.22	0.2556	0.2372	0.2306	0.2372	0.2279	0.2253	0.2477	0.2134	0.2253	0.2003	0.1765	0.1686	0.2385	0.2266	0.2925	0.4875	0.556	0.6153	0.5402	0.6403	0.4545	0.4493
Fungi_Release38	cylindrobasidium_torrendii_fp15055_ss_10	T	0.2767	0.2964	0.3109	0.3215	0.3136	0.3149	0.3149	0.336	0.3702	0.3663	0.3452	0.3281	0.3544	0.357	0.3544	0.3465	0.3254	0.3057	0.2978	0.3175	0.3043	0.3004	0.3057	0.2978	0.2516	0.2846	0.2635	0.2754	0.2622	0.2582	0.3057	0.3004	0.3162	0.3333	0.332	0.3017	0.3294	0.2451	0.2437	0.2622	0.141	0.1291	0.1238	0.17	0.1054	0.2069	0.0685
Fungi_Release38	cryptococcus_gattii_ejb2	A	0.2375	0.2322	0.2388	0.2678	0.2269	0.2216	0.2348	0.2441	0.2111	0.2309	0.2375	0.2348	0.2665	0.2625	0.223	0.2612	0.2586	0.2507	0.2876	0.2639	0.2929	0.2942	0.2836	0.31	0.3153	0.277	0.281	0.3364	0.3193	0.3008	0.281	0.2823	0.2652	0.2533	0.248	0.2744	0.2916	0.2691	0.2836	0.1966	0.2137	0.2005	0.2032	0.2203	0.2652	0.31	0.4749
Fungi_Release38	cryptococcus_gattii_ejb2	C	0.1992	0.1702	0.2216	0.1821	0.2045	0.2269	0.223	0.2269	0.1979	0.2071	0.2348	0.2098	0.2177	0.1887	0.2098	0.1834	0.1847	0.2018	0.1807	0.2018	0.1847	0.1675	0.1583	0.1702	0.1636	0.1953	0.19	0.1715	0.1834	0.1873	0.1926	0.1939	0.1953	0.2111	0.223	0.19	0.153	0.1741	0.1478	0.153	0.0871	0.0805	0.062	0.0739	0.0818	0.0976	0.0594
Fungi_Release38	cryptococcus_gattii_ejb2	G	0.2586	0.2427	0.2203	0.2018	0.223	0.1821	0.2032	0.1755	0.2203	0.2164	0.2084	0.219	0.2137	0.223	0.2164	0.2216	0.2177	0.2282	0.2414	0.215	0.2216	0.2427	0.2441	0.2704	0.2586	0.2691	0.2586	0.2203	0.2137	0.2375	0.2427	0.2599	0.2573	0.2335	0.2296	0.2493	0.2678	0.2652	0.3074	0.376	0.5211	0.5673	0.6108	0.5317	0.5145	0.3826	0.3483
Fungi_Release38	cryptococcus_gattii_ejb2	T	0.3047	0.3549	0.3193	0.3483	0.3456	0.3694	0.3391	0.3536	0.3707	0.3456	0.3193	0.3364	0.3021	0.3259	0.3509	0.3338	0.3391	0.3193	0.2902	0.3193	0.3008	0.2955	0.314	0.2493	0.2625	0.2586	0.2704	0.2718	0.2836	0.2744	0.2836	0.2639	0.2823	0.3021	0.2995	0.2863	0.2876	0.2916	0.2612	0.2744	0.1781	0.1517	0.124	0.1741	0.1385	0.2098	0.1174
Fungi_Release38	fibroporia_radiculosa	A	0.1984	0.1905	0.1852	0.1905	0.205	0.172	0.1786	0.2063	0.1892	0.2116	0.2063	0.1878	0.2077	0.1971	0.2209	0.2209	0.2222	0.1759	0.2222	0.2037	0.2513	0.2328	0.2394	0.2196	0.2632	0.2222	0.2262	0.2275	0.2288	0.254	0.2209	0.2394	0.2474	0.2526	0.2368	0.2354	0.2619	0.2738	0.2341	0.1323	0.1852	0.1667	0.1534	0.1878	0.164	0.2063	0.3836
Fungi_Release38	fibroporia_radiculosa	C	0.1812	0.209	0.2143	0.1971	0.2275	0.2407	0.2579	0.2275	0.2712	0.2447	0.2328	0.2566	0.2579	0.2235	0.2407	0.2712	0.2513	0.2606	0.2381	0.2407	0.2222	0.2434	0.2368	0.2381	0.2235	0.2407	0.2288	0.2328	0.254	0.2394	0.213	0.2315	0.2474	0.2381	0.2447	0.2328	0.2447	0.2394	0.213	0.2407	0.1164	0.1138	0.078	0.1243	0.0913	0.1442	0.0648
Fungi_Release38	fibroporia_radiculosa	G	0.3241	0.3108	0.3042	0.2646	0.2183	0.2394	0.2262	0.2275	0.2143	0.2169	0.2156	0.213	0.1918	0.2474	0.2222	0.1997	0.213	0.2249	0.2447	0.2553	0.2434	0.2434	0.2381	0.2434	0.2341	0.2249	0.2447	0.2487	0.2209	0.2011	0.2381	0.2183	0.2169	0.2209	0.1799	0.2222	0.2011	0.2288	0.2923	0.332	0.5437	0.5701	0.6362	0.5132	0.6058	0.463	0.4643
Fungi_Release38	fibroporia_radiculosa	T	0.2963	0.2897	0.2963	0.3479	0.3492	0.3479	0.3373	0.3386	0.3254	0.3267	0.3452	0.3426	0.3426	0.332	0.3161	0.3082	0.3135	0.3386	0.295	0.3003	0.2831	0.2804	0.2857	0.2989	0.2791	0.3122	0.3003	0.291	0.2963	0.3056	0.328	0.3108	0.2884	0.2884	0.3386	0.3095	0.2923	0.2579	0.2606	0.295	0.1548	0.1495	0.1323	0.1746	0.1389	0.1865	0.0873
Fungi_Release38	cryptococcus_depauperatus_cbs_7855	A	0.247	0.2377	0.255	0.251	0.2258	0.2258	0.2258	0.2244	0.243	0.2364	0.1992	0.2271	0.2032	0.2125	0.2829	0.2311	0.2324	0.2297	0.2444	0.2417	0.2483	0.2656	0.255	0.2537	0.3015	0.2683	0.2762	0.2869	0.2842	0.2935	0.2696	0.2908	0.2736	0.2497	0.2284	0.2218	0.2297	0.3041	0.3652	0.2882	0.255	0.2789	0.1753	0.166	0.174	0.2019	0.3851
Fungi_Release38	cryptococcus_depauperatus_cbs_7855	C	0.162	0.1474	0.1753	0.1647	0.1487	0.17	0.1527	0.1633	0.1766	0.1766	0.1939	0.1514	0.178	0.2231	0.158	0.2005	0.1939	0.178	0.1846	0.1633	0.1713	0.1753	0.1833	0.1753	0.1713	0.1647	0.1766	0.166	0.1448	0.1527	0.2098	0.1753	0.1859	0.1846	0.2231	0.2324	0.1952	0.1554	0.1421	0.1846	0.1434	0.0584	0.0876	0.0837	0.0558	0.0903	0.0916
Fungi_Release38	cryptococcus_depauperatus_cbs_7855	G	0.2722	0.2975	0.2722	0.2895	0.2922	0.2709	0.2709	0.2789	0.2537	0.2271	0.2603	0.2683	0.2776	0.2749	0.2258	0.239	0.255	0.2669	0.2311	0.2975	0.2696	0.247	0.2789	0.2935	0.2669	0.2829	0.2656	0.2869	0.2829	0.2709	0.259	0.2563	0.2696	0.2736	0.2802	0.2404	0.2483	0.2616	0.2563	0.2404	0.413	0.4821	0.5857	0.5817	0.6441	0.5139	0.417
Fungi_Release38	cryptococcus_depauperatus_cbs_7855	T	0.3187	0.3174	0.2975	0.2948	0.3333	0.3333	0.3506	0.3333	0.3267	0.3599	0.3466	0.3533	0.3413	0.2895	0.3333	0.3293	0.3187	0.3254	0.34	0.2975	0.3108	0.3121	0.2829	0.2776	0.2603	0.2842	0.2815	0.2603	0.2882	0.2829	0.2616	0.2776	0.2709	0.2922	0.2683	0.3054	0.3267	0.2789	0.2364	0.2869	0.1886	0.1806	0.1514	0.1687	0.1262	0.1939	0.1062
Fungi_Release38	arthrobotrys_oligospora_atcc_24927	A	0.2593	0.2872	0.2899	0.2673	0.262	0.2739	0.266	0.2779	0.2566	0.2739	0.3205	0.2793	0.3019	0.3085	0.2952	0.3059	0.3112	0.2793	0.2726	0.3085	0.3019	0.3098	0.2952	0.3231	0.2952	0.3125	0.3138	0.3138	0.3205	0.3125	0.3125	0.3205	0.3205	0.3125	0.2886	0.2899	0.2939	0.2673	0.238	0.1356	0.1755	0.1809	0.1968	0.2766	0.3431	0.3737	0.6277
Fungi_Release38	arthrobotrys_oligospora_atcc_24927	C	0.1822	0.1689	0.1862	0.1822	0.1862	0.2035	0.1822	0.1649	0.1928	0.1928	0.1649	0.1782	0.1742	0.1609	0.1529	0.1449	0.121	0.1636	0.1689	0.1476	0.1489	0.1436	0.1556	0.1436	0.1782	0.1356	0.1596	0.1835	0.1702	0.1795	0.1981	0.1689	0.1649	0.1769	0.1809	0.1702	0.1423	0.117	0.1423	0.1277	0.0638	0.0505	0.0399	0.0452	0.0678	0.0678	0.0545
Fungi_Release38	arthrobotrys_oligospora_atcc_24927	G	0.1715	0.1822	0.1822	0.1888	0.1862	0.1769	0.1848	0.2181	0.2128	0.2035	0.2074	0.2141	0.1888	0.2274	0.242	0.2181	0.2128	0.2314	0.2314	0.2274	0.242	0.2473	0.2394	0.2221	0.2074	0.2035	0.2048	0.2048	0.1955	0.1848	0.1636	0.1809	0.1902	0.1476	0.1769	0.1995	0.2154	0.2766	0.3391	0.4255	0.6051	0.6476	0.6263	0.512	0.4335	0.2566	0.2074
Fungi_Release38	arthrobotrys_oligospora_atcc_24927	T	0.387	0.3617	0.3418	0.3617	0.3657	0.3457	0.367	0.3391	0.3378	0.3298	0.3072	0.3285	0.3351	0.3032	0.3098	0.3311	0.3551	0.3258	0.3271	0.3165	0.3072	0.2992	0.3098	0.3112	0.3191	0.3484	0.3218	0.2979	0.3138	0.3231	0.3258	0.3298	0.3245	0.363	0.3537	0.3404	0.3484	0.3391	0.2806	0.3112	0.1556	0.121	0.137	0.1662	0.1556	0.3019	0.1104
Fungi_Release38	cryptococcus_gattii_vgii_2001_935_1	A	0.2413	0.2426	0.2386	0.2426	0.252	0.2158	0.2534	0.2694	0.2373	0.2346	0.252	0.2413	0.2735	0.2614	0.2681	0.2534	0.2641	0.2373	0.2802	0.2909	0.2895	0.2909	0.2869	0.307	0.2976	0.2882	0.2869	0.307	0.3097	0.319	0.2895	0.2721	0.2654	0.2909	0.2828	0.2694	0.2828	0.2721	0.2895	0.2131	0.2225	0.2185	0.1997	0.2225	0.2828	0.3016	0.5027
Fungi_Release38	cryptococcus_gattii_vgii_2001_935_1	C	0.1783	0.189	0.2158	0.2105	0.1984	0.2185	0.2064	0.1917	0.2145	0.2198	0.2225	0.2158	0.2359	0.189	0.2051	0.1944	0.1957	0.2024	0.185	0.2091	0.1702	0.1769	0.1501	0.1582	0.1716	0.1689	0.1971	0.185	0.2198	0.181	0.2038	0.2064	0.1957	0.2038	0.2064	0.1957	0.1501	0.1635	0.1716	0.1475	0.1019	0.0603	0.0617	0.0643	0.0871	0.0818	0.0697
Fungi_Release38	cryptococcus_gattii_vgii_2001_935_1	G	0.2493	0.2292	0.2118	0.2105	0.2038	0.1877	0.2011	0.1756	0.1903	0.1957	0.2145	0.2131	0.1944	0.2252	0.189	0.2279	0.2198	0.2346	0.2319	0.1984	0.2654	0.2359	0.2413	0.256	0.2681	0.2708	0.2574	0.2426	0.2198	0.2118	0.2212	0.2654	0.2466	0.2252	0.2051	0.2292	0.2842	0.2735	0.2936	0.3606	0.508	0.5831	0.5952	0.5214	0.496	0.3914	0.3324
Fungi_Release38	cryptococcus_gattii_vgii_2001_935_1	T	0.3311	0.3391	0.3338	0.3365	0.3458	0.378	0.3391	0.3633	0.3579	0.3499	0.311	0.3298	0.2962	0.3244	0.3378	0.3244	0.3204	0.3257	0.3029	0.3016	0.2748	0.2962	0.3217	0.2788	0.2627	0.2721	0.2587	0.2654	0.2507	0.2882	0.2855	0.256	0.2922	0.2802	0.3056	0.3056	0.2828	0.2909	0.2453	0.2788	0.1676	0.1381	0.1434	0.1917	0.134	0.2252	0.0952
Fungi_Release38	aspergillus_carbonarius_item_5010	A	0.1833	0.2022	0.1968	0.2372	0.1846	0.1981	0.1779	0.2035	0.1792	0.19	0.1981	0.2332	0.1927	0.2075	0.2035	0.2237	0.217	0.2102	0.2224	0.2183	0.2318	0.2385	0.2426	0.2466	0.2372	0.252	0.2871	0.2439	0.2628	0.2534	0.2925	0.2291	0.279	0.2372	0.2183	0.2332	0.2615	0.2871	0.2439	0.2197	0.2588	0.1927	0.1361	0.1765	0.1941	0.2291	0.4232
Fungi_Release38	aspergillus_carbonarius_item_5010	C	0.217	0.2116	0.2089	0.2129	0.2102	0.2237	0.2318	0.2332	0.2493	0.2574	0.2722	0.2493	0.2264	0.2197	0.2358	0.2372	0.2075	0.2116	0.2143	0.2561	0.2129	0.2156	0.2156	0.2075	0.186	0.1995	0.1819	0.1914	0.1914	0.2224	0.1833	0.2049	0.2089	0.2197	0.2305	0.1927	0.1873	0.2116	0.2035	0.155	0.1186	0.1348	0.0822	0.0674	0.0606	0.0836	0.0889
Fungi_Release38	aspergillus_carbonarius_item_5010	G	0.2817	0.2655	0.2871	0.2601	0.2817	0.2561	0.2399	0.2372	0.2898	0.2547	0.2534	0.2372	0.2534	0.2992	0.2951	0.2534	0.2655	0.2615	0.2817	0.2655	0.2978	0.2817	0.2749	0.3127	0.3032	0.2938	0.2871	0.2655	0.2938	0.283	0.2399	0.2857	0.2399	0.2588	0.2655	0.248	0.2695	0.2695	0.2655	0.3518	0.4569	0.527	0.655	0.6078	0.6092	0.4501	0.3922
Fungi_Release38	aspergillus_carbonarius_item_5010	T	0.3181	0.3208	0.3073	0.2898	0.3235	0.3221	0.3504	0.3261	0.2817	0.2978	0.2763	0.2803	0.3275	0.2736	0.2655	0.2857	0.31	0.3167	0.2817	0.2601	0.2574	0.2642	0.2668	0.2332	0.2736	0.2547	0.2439	0.2992	0.252	0.2412	0.2844	0.2803	0.2722	0.2844	0.2857	0.3261	0.2817	0.2318	0.2871	0.2736	0.1658	0.1456	0.1267	0.1482	0.1361	0.2372	0.0957
Fungi_Release38	cryptococcus_gattii_vgii_mmrl2647	A	0.2449	0.2355	0.2368	0.2409	0.2544	0.2246	0.249	0.2585	0.2314	0.2314	0.2639	0.2409	0.2706	0.2625	0.2747	0.249	0.2679	0.2449	0.2666	0.2896	0.295	0.2855	0.2882	0.2963	0.3166	0.2855	0.2882	0.3112	0.3153	0.3275	0.2882	0.2679	0.272	0.2828	0.2828	0.2706	0.2788	0.2774	0.2882	0.2084	0.2206	0.2165	0.1962	0.2233	0.2882	0.3031	0.5047
Fungi_Release38	cryptococcus_gattii_vgii_mmrl2647	C	0.1827	0.1867	0.2084	0.1962	0.2016	0.2246	0.2043	0.1989	0.2192	0.226	0.2206	0.2219	0.226	0.1949	0.203	0.1949	0.1908	0.1989	0.1881	0.207	0.1759	0.1813	0.1529	0.161	0.1746	0.1732	0.1922	0.1867	0.2138	0.1746	0.2043	0.2084	0.1989	0.2003	0.2111	0.2016	0.1488	0.1516	0.1556	0.1461	0.1028	0.0582	0.065	0.0582	0.088	0.0853	0.0636
Fungi_Release38	cryptococcus_gattii_vgii_mmrl2647	G	0.2436	0.23	0.2124	0.2179	0.1922	0.1881	0.1949	0.1827	0.184	0.1922	0.2057	0.2084	0.2003	0.226	0.1854	0.23	0.2206	0.23	0.2382	0.2016	0.2558	0.2327	0.2355	0.2585	0.2558	0.2747	0.2517	0.2382	0.2165	0.2152	0.226	0.2652	0.2422	0.2355	0.2084	0.2246	0.2815	0.2801	0.3031	0.3694	0.5101	0.5859	0.5981	0.5264	0.4885	0.3857	0.3369
Fungi_Release38	cryptococcus_gattii_vgii_mmrl2647	T	0.3288	0.3478	0.3424	0.3451	0.3518	0.3627	0.3518	0.3599	0.3654	0.3505	0.3099	0.3288	0.3031	0.3166	0.3369	0.3261	0.3207	0.3261	0.3072	0.3018	0.2733	0.3004	0.3234	0.2842	0.253	0.2666	0.2679	0.2639	0.2544	0.2828	0.2815	0.2585	0.2869	0.2815	0.2977	0.3031	0.2909	0.2909	0.253	0.276	0.1664	0.1394	0.1407	0.1922	0.1353	0.226	0.0947
Fungi_Release38	cryptococcus_gattii_vgii_ca1014	A	0.2344	0.2236	0.2398	0.2371	0.2466	0.2182	0.248	0.2425	0.2331	0.2317	0.2575	0.2439	0.2751	0.2547	0.2629	0.252	0.2615	0.2398	0.2832	0.29	0.29	0.2927	0.2859	0.2995	0.2981	0.2927	0.2886	0.3089	0.3117	0.3279	0.2873	0.2737	0.271	0.2818	0.2859	0.2751	0.2832	0.2846	0.29	0.2127	0.2195	0.2154	0.1951	0.2236	0.2818	0.3035	0.5
Fungi_Release38	cryptococcus_gattii_vgii_ca1014	C	0.1843	0.1924	0.206	0.2073	0.1965	0.2236	0.2073	0.1951	0.2141	0.2236	0.2168	0.2154	0.2276	0.1883	0.2087	0.206	0.1978	0.1938	0.1843	0.21	0.1762	0.1802	0.1491	0.1558	0.1721	0.1816	0.2019	0.187	0.2141	0.1802	0.2005	0.206	0.1924	0.1978	0.2033	0.1992	0.1504	0.1612	0.168	0.1436	0.1043	0.0569	0.0637	0.0623	0.0894	0.0799	0.0705
Fungi_Release38	cryptococcus_gattii_vgii_ca1014	G	0.2453	0.2398	0.2209	0.2154	0.1978	0.1951	0.1992	0.1883	0.1911	0.1951	0.2087	0.2154	0.1965	0.2263	0.1856	0.2209	0.2195	0.2358	0.2331	0.206	0.2534	0.2317	0.2398	0.2642	0.2656	0.2669	0.2439	0.2371	0.2249	0.2046	0.229	0.2602	0.2453	0.2276	0.2114	0.2263	0.2737	0.2669	0.2927	0.3618	0.5136	0.584	0.6057	0.5298	0.4919	0.393	0.3306
Fungi_Release38	cryptococcus_gattii_vgii_ca1014	T	0.336	0.3442	0.3333	0.3401	0.3591	0.3631	0.3455	0.374	0.3618	0.3496	0.3171	0.3252	0.3008	0.3306	0.3428	0.3211	0.3211	0.3306	0.2995	0.294	0.2805	0.2954	0.3252	0.2805	0.2642	0.2588	0.2656	0.2669	0.2493	0.2873	0.2832	0.2602	0.2913	0.2927	0.2995	0.2995	0.2927	0.2873	0.2493	0.2818	0.1626	0.1436	0.1355	0.1843	0.1369	0.2236	0.0989
Fungi_Release38	cryptococcus_gattii_vgii_cbs_10090	A	0.2422	0.2286	0.2327	0.2354	0.2558	0.2177	0.2449	0.2517	0.2286	0.2327	0.2558	0.2422	0.2694	0.2585	0.2694	0.249	0.2612	0.2327	0.2735	0.2993	0.2952	0.2925	0.2844	0.2966	0.2993	0.2966	0.2816	0.3156	0.3102	0.3293	0.2884	0.2707	0.268	0.2803	0.2816	0.2803	0.2748	0.283	0.2871	0.2109	0.2204	0.2136	0.1959	0.2259	0.2844	0.3075	0.5034
Fungi_Release38	cryptococcus_gattii_vgii_cbs_10090	C	0.181	0.1918	0.215	0.2136	0.1932	0.2204	0.2041	0.1959	0.2136	0.2177	0.2163	0.2136	0.2313	0.1946	0.2041	0.2082	0.1986	0.1946	0.1878	0.2122	0.1755	0.1714	0.1524	0.1578	0.1796	0.1728	0.2041	0.1864	0.2109	0.185	0.1973	0.2109	0.1986	0.1973	0.2109	0.1932	0.1524	0.1592	0.1687	0.1456	0.098	0.0558	0.0653	0.0599	0.0884	0.0789	0.0721
Fungi_Release38	cryptococcus_gattii_vgii_cbs_10090	G	0.2463	0.2327	0.2218	0.2163	0.1973	0.1905	0.2027	0.1782	0.1932	0.2014	0.2054	0.2218	0.1864	0.2259	0.1878	0.2245	0.2163	0.2435	0.2408	0.1973	0.2531	0.2381	0.2435	0.2653	0.2599	0.268	0.2503	0.2327	0.2272	0.2054	0.2313	0.2612	0.2381	0.2327	0.2122	0.2245	0.2816	0.268	0.2939	0.3646	0.5184	0.5878	0.5973	0.5238	0.4912	0.3864	0.3265
Fungi_Release38	cryptococcus_gattii_vgii_cbs_10090	T	0.3306	0.3469	0.3306	0.3347	0.3537	0.3714	0.3483	0.3741	0.3646	0.3483	0.3224	0.3224	0.3129	0.3211	0.3388	0.3184	0.3238	0.3293	0.298	0.2912	0.2762	0.298	0.3197	0.2803	0.2612	0.2626	0.2639	0.2653	0.2517	0.2803	0.283	0.2571	0.2952	0.2898	0.2952	0.302	0.2912	0.2898	0.2503	0.2789	0.1633	0.1429	0.1415	0.1905	0.1361	0.2272	0.098
Fungi_Release38	cryptococcus_gattii_vgii_la55	A	0.2425	0.2302	0.2343	0.2371	0.2561	0.2193	0.2452	0.2548	0.2289	0.2289	0.2534	0.2398	0.2684	0.2589	0.2698	0.2466	0.2643	0.233	0.2752	0.2984	0.2956	0.2916	0.2834	0.2984	0.3011	0.2956	0.2807	0.3174	0.3106	0.3324	0.2902	0.2725	0.2698	0.2807	0.2834	0.2807	0.2752	0.2834	0.2861	0.2084	0.2207	0.2125	0.1989	0.2289	0.2861	0.3065	0.5054
Fungi_Release38	cryptococcus_gattii_vgii_la55	C	0.1798	0.1921	0.2153	0.2112	0.1948	0.2166	0.2057	0.1948	0.2112	0.218	0.2153	0.2125	0.2316	0.1935	0.203	0.2071	0.1989	0.1948	0.1853	0.2112	0.1744	0.1717	0.1512	0.158	0.1771	0.1744	0.203	0.1894	0.2139	0.1839	0.1962	0.2112	0.2003	0.1962	0.2112	0.1935	0.1553	0.158	0.1676	0.1471	0.0995	0.0559	0.0654	0.0599	0.0886	0.079	0.0708
Fungi_Release38	cryptococcus_gattii_vgii_la55	G	0.2466	0.2302	0.2207	0.218	0.1975	0.1894	0.2016	0.1771	0.1962	0.2044	0.2071	0.2248	0.1894	0.2248	0.188	0.2248	0.2125	0.2425	0.2398	0.1989	0.2548	0.2357	0.248	0.2629	0.2589	0.2643	0.2507	0.2316	0.2262	0.2044	0.233	0.2589	0.2371	0.233	0.2112	0.2234	0.2779	0.2684	0.2943	0.3665	0.5163	0.5886	0.594	0.5191	0.4864	0.3883	0.3243
Fungi_Release38	cryptococcus_gattii_vgii_la55	T	0.3311	0.3474	0.3297	0.3338	0.3515	0.3747	0.3474	0.3733	0.3638	0.3488	0.3243	0.3229	0.3106	0.3229	0.3392	0.3215	0.3243	0.3297	0.2997	0.2916	0.2752	0.3011	0.3174	0.2807	0.2629	0.2657	0.2657	0.2616	0.2493	0.2793	0.2807	0.2575	0.2929	0.2902	0.2943	0.3025	0.2916	0.2902	0.252	0.2779	0.1635	0.1431	0.1417	0.1921	0.139	0.2262	0.0995
Fungi_Release38	cryptococcus_gattii_ca1873	A	0.2265	0.2456	0.2619	0.2442	0.236	0.2265	0.2374	0.2087	0.2046	0.221	0.2442	0.2633	0.2619	0.2333	0.2551	0.2469	0.2592	0.2401	0.281	0.2756	0.2701	0.3083	0.2974	0.2947	0.296	0.2715	0.2824	0.3274	0.3165	0.3247	0.2783	0.2783	0.2647	0.2647	0.2565	0.2729	0.2769	0.2892	0.3015	0.1992	0.2224	0.2087	0.1937	0.2265	0.2674	0.3056	0.4843
Fungi_Release38	cryptococcus_gattii_ca1873	C	0.1855	0.1855	0.1692	0.191	0.2074	0.191	0.2347	0.2115	0.1951	0.2237	0.2606	0.1883	0.2333	0.1965	0.2046	0.2005	0.2074	0.2046	0.1814	0.1896	0.1951	0.176	0.1542	0.1501	0.1528	0.1951	0.1814	0.176	0.1924	0.1719	0.1896	0.2087	0.2115	0.2046	0.2237	0.1924	0.1528	0.1623	0.1555	0.1637	0.0982	0.0709	0.0778	0.0682	0.0764	0.0955	0.0559
Fungi_Release38	cryptococcus_gattii_ca1873	G	0.2647	0.2333	0.2251	0.2319	0.2101	0.1828	0.1978	0.2087	0.2237	0.2074	0.1924	0.2115	0.2115	0.2265	0.2115	0.2224	0.2237	0.2333	0.2374	0.2237	0.2442	0.236	0.2469	0.2783	0.2797	0.2769	0.2538	0.2265	0.2319	0.2401	0.2374	0.2497	0.2619	0.2524	0.2169	0.251	0.2647	0.2619	0.2947	0.3629	0.5102	0.5798	0.6003	0.5266	0.5171	0.3997	0.3452
Fungi_Release38	cryptococcus_gattii_ca1873	T	0.3233	0.3356	0.3438	0.3329	0.3465	0.3997	0.3302	0.3711	0.3765	0.3479	0.3029	0.337	0.2933	0.3438	0.3288	0.3302	0.3097	0.322	0.3001	0.3111	0.2906	0.2797	0.3015	0.2769	0.2715	0.2565	0.2824	0.2701	0.2592	0.2633	0.2947	0.2633	0.2619	0.2783	0.3029	0.2838	0.3056	0.2865	0.2483	0.2742	0.1692	0.1405	0.1282	0.1787	0.1392	0.1992	0.1146
Fungi_Release38	cryptococcus_gattii_vgii_r265	A	0.236	0.2265	0.2387	0.2387	0.2469	0.2237	0.251	0.2415	0.2319	0.2265	0.2565	0.2483	0.2742	0.2538	0.2688	0.2538	0.2524	0.2374	0.2851	0.2892	0.2892	0.2947	0.2851	0.3015	0.2988	0.2947	0.2879	0.3042	0.3097	0.3288	0.2851	0.2688	0.2715	0.2769	0.2824	0.2742	0.2906	0.2824	0.292	0.2115	0.2224	0.2142	0.1992	0.2237	0.2769	0.3056	0.5007
Fungi_Release38	cryptococcus_gattii_vgii_r265	C	0.1883	0.191	0.2087	0.206	0.1965	0.2196	0.2101	0.1937	0.2142	0.2224	0.2128	0.2156	0.2278	0.191	0.206	0.2087	0.1965	0.2005	0.1801	0.2087	0.1774	0.1842	0.1487	0.1555	0.1705	0.1787	0.206	0.1896	0.2128	0.1801	0.2019	0.2101	0.191	0.2046	0.2005	0.1978	0.1514	0.1692	0.1678	0.1432	0.1023	0.0587	0.0641	0.0668	0.0928	0.0791	0.0709
Fungi_Release38	cryptococcus_gattii_vgii_r265	G	0.2428	0.2401	0.2224	0.2169	0.1965	0.1951	0.2046	0.1883	0.1924	0.1992	0.2156	0.2087	0.1992	0.2278	0.1855	0.221	0.221	0.2333	0.2347	0.2074	0.2538	0.2265	0.2469	0.2647	0.2633	0.2647	0.2428	0.2374	0.2278	0.206	0.2306	0.2619	0.2497	0.2237	0.2156	0.2306	0.2715	0.2619	0.2906	0.3629	0.513	0.5798	0.603	0.5252	0.4952	0.3943	0.3302
Fungi_Release38	cryptococcus_gattii_vgii_r265	T	0.3329	0.3424	0.3302	0.3383	0.3602	0.3615	0.3342	0.3765	0.3615	0.352	0.3151	0.3274	0.2988	0.3274	0.3397	0.3165	0.3302	0.3288	0.3001	0.2947	0.2797	0.2947	0.3192	0.2783	0.2674	0.2619	0.2633	0.2688	0.2497	0.2851	0.2824	0.2592	0.2879	0.2947	0.3015	0.2974	0.2865	0.2865	0.2497	0.2824	0.1623	0.1473	0.1337	0.1842	0.1351	0.221	0.0982
Fungi_Release38	cryptococcus_gattii_vgii_ram5	A	0.2387	0.2333	0.236	0.2374	0.251	0.2224	0.2565	0.2578	0.2333	0.2306	0.2578	0.2374	0.2688	0.2633	0.2783	0.2524	0.2633	0.2415	0.2756	0.2974	0.2974	0.2865	0.2865	0.3042	0.3001	0.292	0.2865	0.3083	0.3111	0.3261	0.292	0.281	0.2688	0.2906	0.281	0.2701	0.2838	0.2783	0.2933	0.2128	0.2183	0.2115	0.1937	0.2251	0.2906	0.3015	0.5048
Fungi_Release38	cryptococcus_gattii_vgii_ram5	C	0.1814	0.1828	0.206	0.2087	0.1965	0.2251	0.2046	0.1951	0.2156	0.2237	0.2087	0.2128	0.2374	0.1883	0.2033	0.2033	0.1869	0.1978	0.1883	0.2128	0.1678	0.1801	0.1501	0.1569	0.1787	0.1692	0.2005	0.191	0.2115	0.1787	0.2019	0.2005	0.1965	0.1965	0.2101	0.2005	0.1501	0.1623	0.1678	0.146	0.101	0.0559	0.0655	0.0668	0.0873	0.0846	0.0696
Fungi_Release38	cryptococcus_gattii_vgii_ram5	G	0.2483	0.2374	0.2183	0.2156	0.2019	0.1855	0.1965	0.1814	0.1896	0.1924	0.2183	0.2169	0.1896	0.2306	0.1828	0.2237	0.2292	0.2306	0.2374	0.1937	0.251	0.2333	0.2442	0.2647	0.2578	0.2729	0.2497	0.2333	0.2237	0.2115	0.2306	0.2538	0.2456	0.2306	0.2101	0.2251	0.2756	0.2715	0.2906	0.3574	0.5171	0.5894	0.603	0.5225	0.4857	0.3902	0.3274
Fungi_Release38	cryptococcus_gattii_vgii_ram5	T	0.3315	0.3465	0.3397	0.3383	0.3506	0.367	0.3424	0.3656	0.3615	0.3533	0.3151	0.3329	0.3042	0.3179	0.3356	0.3206	0.3206	0.3302	0.2988	0.296	0.2838	0.3001	0.3192	0.2742	0.2633	0.266	0.2633	0.2674	0.2538	0.2838	0.2756	0.2647	0.2892	0.2824	0.2988	0.3042	0.2906	0.2879	0.2483	0.2838	0.1637	0.1432	0.1378	0.1855	0.1364	0.2237	0.0982
Fungi_Release38	hydnomerulius_pinastri_md_312	A	0.2049	0.1899	0.1967	0.2199	0.2049	0.209	0.1721	0.1926	0.2309	0.2268	0.224	0.2309	0.2049	0.1954	0.1872	0.2213	0.209	0.2254	0.2145	0.2404	0.2254	0.2158	0.2186	0.2445	0.2391	0.235	0.2295	0.2527	0.2131	0.2459	0.2186	0.2404	0.2623	0.2459	0.2336	0.2568	0.2486	0.224	0.2036	0.1831	0.1639	0.168	0.1557	0.1872	0.2473	0.2541	0.4057
Fungi_Release38	hydnomerulius_pinastri_md_312	C	0.2036	0.1967	0.2486	0.2295	0.2404	0.2322	0.2445	0.2268	0.2363	0.2459	0.2719	0.2131	0.2582	0.2678	0.2322	0.2227	0.224	0.2459	0.2773	0.2309	0.2172	0.2213	0.2391	0.2473	0.2459	0.2309	0.2158	0.2309	0.2404	0.2172	0.2117	0.2131	0.2158	0.2459	0.2609	0.2158	0.1926	0.2254	0.2186	0.2022	0.127	0.0943	0.0779	0.1202	0.0915	0.1366	0.0902
Fungi_Release38	hydnomerulius_pinastri_md_312	G	0.2691	0.3019	0.2254	0.2459	0.2227	0.2199	0.2131	0.2555	0.2158	0.1899	0.2268	0.1981	0.2049	0.224	0.2541	0.2404	0.2541	0.2281	0.2104	0.2145	0.2555	0.2732	0.2623	0.2555	0.2486	0.2664	0.2459	0.2418	0.2691	0.2281	0.2514	0.2145	0.1913	0.2077	0.2117	0.2199	0.2801	0.2746	0.3101	0.3634	0.5697	0.6134	0.6243	0.5191	0.5109	0.3934	0.4221
Fungi_Release38	hydnomerulius_pinastri_md_312	T	0.3224	0.3115	0.3292	0.3046	0.332	0.3388	0.3702	0.3251	0.3169	0.3374	0.2773	0.3579	0.332	0.3128	0.3265	0.3156	0.3128	0.3005	0.2978	0.3142	0.3019	0.2896	0.2801	0.2527	0.2664	0.2678	0.3087	0.2746	0.2773	0.3087	0.3183	0.332	0.3306	0.3005	0.2937	0.3074	0.2787	0.276	0.2678	0.2514	0.1393	0.1243	0.1421	0.1735	0.1503	0.2158	0.082
Fungi_Release38	cryptococcus_gattii_vgii_99_473	A	0.2367	0.2339	0.2394	0.2326	0.2531	0.2202	0.2585	0.2544	0.2326	0.2298	0.2599	0.2394	0.2736	0.2599	0.2777	0.2476	0.2572	0.2394	0.2722	0.2914	0.2955	0.2886	0.2873	0.3037	0.2982	0.2873	0.2873	0.3092	0.3133	0.3283	0.2886	0.275	0.2668	0.2886	0.2763	0.2722	0.2845	0.2763	0.2914	0.2107	0.2161	0.2107	0.1943	0.2257	0.29	0.3078	0.5089
Fungi_Release38	cryptococcus_gattii_vgii_99_473	C	0.1806	0.1833	0.2052	0.2093	0.1943	0.2244	0.2025	0.1956	0.2161	0.2216	0.2079	0.212	0.2353	0.1874	0.2038	0.2052	0.1902	0.1956	0.1874	0.212	0.1683	0.1819	0.1518	0.156	0.1792	0.1724	0.1997	0.1915	0.2079	0.1792	0.1997	0.2052	0.1956	0.1984	0.2107	0.197	0.1532	0.1614	0.1642	0.145	0.1012	0.0547	0.0657	0.067	0.0889	0.0834	0.0684
Fungi_Release38	cryptococcus_gattii_vgii_99_473	G	0.2517	0.2339	0.2175	0.2189	0.1997	0.1888	0.1984	0.186	0.1915	0.1929	0.2175	0.2175	0.1915	0.2285	0.1888	0.2257	0.2298	0.2339	0.2394	0.197	0.2531	0.2257	0.2408	0.2654	0.2585	0.2709	0.2517	0.2285	0.2257	0.2107	0.2312	0.2572	0.249	0.2285	0.2107	0.2271	0.2791	0.2763	0.2941	0.3611	0.5171	0.5937	0.6019	0.5171	0.4843	0.3885	0.3242
Fungi_Release38	cryptococcus_gattii_vgii_99_473	T	0.3311	0.3488	0.3379	0.3393	0.3529	0.3666	0.3406	0.3639	0.3598	0.3557	0.3146	0.3311	0.2996	0.3242	0.3297	0.3215	0.3228	0.3311	0.301	0.2996	0.2832	0.3037	0.3201	0.275	0.264	0.2695	0.2613	0.2709	0.2531	0.2818	0.2804	0.2627	0.2886	0.2845	0.3023	0.3037	0.2832	0.2859	0.2503	0.2832	0.1655	0.1409	0.1382	0.1902	0.1368	0.2202	0.0985
Fungi_Release38	cryptococcus_gattii_vgiv_ind107	A	0.2216	0.2257	0.238	0.2613	0.2367	0.1984	0.2285	0.2148	0.2339	0.2148	0.264	0.2394	0.2599	0.2462	0.2544	0.2558	0.264	0.249	0.2941	0.2777	0.2709	0.3023	0.3105	0.301	0.2859	0.2873	0.2832	0.3092	0.2996	0.2845	0.2818	0.2927	0.2763	0.2613	0.2627	0.2763	0.2695	0.2695	0.2873	0.2052	0.2285	0.2134	0.1874	0.2025	0.2722	0.3201	0.487
Fungi_Release38	cryptococcus_gattii_vgiv_ind107	C	0.1902	0.1833	0.2079	0.171	0.186	0.2257	0.2052	0.2202	0.2093	0.2134	0.2353	0.2066	0.2189	0.2025	0.2052	0.2079	0.1765	0.2011	0.1819	0.1943	0.1819	0.1628	0.1464	0.1546	0.1833	0.1683	0.1943	0.1806	0.1943	0.1792	0.2148	0.1915	0.1956	0.2052	0.2025	0.2025	0.1546	0.1601	0.1669	0.1642	0.0903	0.0657	0.0575	0.0752	0.0766	0.1067	0.052
Fungi_Release38	cryptococcus_gattii_vgiv_ind107	G	0.2449	0.2476	0.2298	0.197	0.2066	0.1915	0.2257	0.1902	0.1915	0.2312	0.1833	0.2134	0.1997	0.2312	0.197	0.1997	0.2011	0.2367	0.249	0.2038	0.249	0.2435	0.2367	0.2804	0.2613	0.2613	0.2408	0.2271	0.2421	0.2531	0.223	0.2408	0.2585	0.2408	0.2353	0.2449	0.2585	0.2709	0.2955	0.3475	0.4938	0.5869	0.6238	0.5458	0.5185	0.357	0.3461
Fungi_Release38	cryptococcus_gattii_vgiv_ind107	T	0.3434	0.3434	0.3242	0.3707	0.3707	0.3844	0.3406	0.3748	0.3653	0.3406	0.3174	0.3406	0.3215	0.3201	0.3434	0.3365	0.3584	0.3133	0.275	0.3242	0.2982	0.2914	0.3064	0.264	0.2695	0.2832	0.2818	0.2832	0.264	0.2832	0.2804	0.275	0.2695	0.2927	0.2996	0.2763	0.3174	0.2996	0.2503	0.2832	0.1874	0.1341	0.1313	0.1765	0.1327	0.2161	0.1149
Fungi_Release38	thielavia_terrestris_nrrl_8126	A	0.1973	0.1808	0.1562	0.1959	0.1904	0.1767	0.189	0.1932	0.1712	0.1753	0.2178	0.1877	0.1904	0.1808	0.2055	0.2151	0.2137	0.1986	0.2178	0.1726	0.2329	0.237	0.2233	0.2164	0.226	0.1959	0.2178	0.2274	0.1836	0.2	0.2137	0.174	0.1945	0.1753	0.1973	0.2096	0.2616	0.2274	0.2164	0.1795	0.1849	0.1575	0.1397	0.1575	0.2082	0.289	0.3671
Fungi_Release38	thielavia_terrestris_nrrl_8126	C	0.2521	0.263	0.2808	0.2781	0.2726	0.289	0.2685	0.274	0.2795	0.2603	0.2534	0.2712	0.2671	0.3068	0.2342	0.2589	0.2603	0.2466	0.2233	0.2781	0.2178	0.2397	0.2493	0.2493	0.2233	0.2466	0.2384	0.2384	0.2808	0.237	0.2521	0.2658	0.2671	0.2726	0.2753	0.2644	0.2438	0.2466	0.2562	0.2329	0.1904	0.1658	0.1397	0.1233	0.1466	0.1315	0.1356
Fungi_Release38	thielavia_terrestris_nrrl_8126	G	0.2849	0.3329	0.3397	0.2918	0.2904	0.2986	0.3151	0.311	0.3096	0.3151	0.3055	0.3192	0.2973	0.3082	0.3534	0.3014	0.3342	0.3274	0.3151	0.3274	0.3425	0.3452	0.3164	0.3274	0.3438	0.326	0.3274	0.3219	0.3342	0.3301	0.3027	0.3329	0.3192	0.3274	0.2808	0.3123	0.2658	0.3479	0.3466	0.4096	0.5164	0.5945	0.6301	0.6123	0.5658	0.4644	0.4356
Fungi_Release38	thielavia_terrestris_nrrl_8126	T	0.2658	0.2233	0.2233	0.2342	0.2466	0.2356	0.2274	0.2219	0.2397	0.2493	0.2233	0.2219	0.2452	0.2041	0.2068	0.2247	0.1918	0.2274	0.2438	0.2219	0.2068	0.1781	0.211	0.2068	0.2068	0.2315	0.2164	0.2123	0.2014	0.2329	0.2315	0.2274	0.2192	0.2247	0.2466	0.2137	0.2288	0.1781	0.1808	0.1781	0.1082	0.0822	0.0904	0.1068	0.0795	0.1151	0.0616
Fungi_Release38	serpula_lacrymans_var_lacrymans_s7_3	A	0.2314	0.2383	0.23	0.2397	0.2231	0.2383	0.2094	0.2204	0.2287	0.2424	0.2231	0.2314	0.2245	0.2231	0.259	0.2452	0.2466	0.241	0.2562	0.259	0.2603	0.2548	0.2879	0.2521	0.2383	0.2631	0.2658	0.2576	0.2534	0.2755	0.2658	0.2631	0.2879	0.2438	0.2672	0.2507	0.3251	0.2865	0.2466	0.1818	0.2218	0.1543	0.2066	0.23	0.2617	0.2328	0.4532
Fungi_Release38	serpula_lacrymans_var_lacrymans_s7_3	C	0.1901	0.1928	0.2052	0.2314	0.2355	0.1915	0.2163	0.2052	0.2287	0.208	0.1997	0.2052	0.23	0.2383	0.186	0.186	0.1818	0.2273	0.1887	0.1983	0.1887	0.1915	0.1749	0.2052	0.2025	0.2107	0.1749	0.2287	0.1983	0.197	0.1777	0.197	0.1832	0.2176	0.208	0.2163	0.1777	0.1708	0.1777	0.1694	0.0854	0.0923	0.0813	0.0689	0.0826	0.1171	0.084
Fungi_Release38	serpula_lacrymans_var_lacrymans_s7_3	G	0.2686	0.2493	0.2397	0.1901	0.2107	0.2149	0.208	0.2107	0.197	0.1997	0.2039	0.1983	0.1928	0.1942	0.1997	0.2135	0.1928	0.2149	0.2121	0.2163	0.2287	0.2355	0.23	0.2355	0.2424	0.2149	0.2176	0.2107	0.2094	0.1915	0.2094	0.1928	0.2094	0.1791	0.1791	0.2149	0.2025	0.241	0.2603	0.3444	0.5331	0.6047	0.562	0.5344	0.5207	0.4394	0.3457
Fungi_Release38	serpula_lacrymans_var_lacrymans_s7_3	T	0.3099	0.3196	0.3251	0.3388	0.3306	0.3554	0.3664	0.3636	0.3457	0.3499	0.3733	0.365	0.3526	0.3444	0.3554	0.3554	0.3788	0.3168	0.343	0.3264	0.3223	0.3182	0.3072	0.3072	0.3168	0.3113	0.3416	0.303	0.3388	0.3361	0.3471	0.3471	0.3196	0.3595	0.3457	0.3182	0.2948	0.3017	0.3154	0.3044	0.1598	0.1488	0.1501	0.1667	0.135	0.2107	0.1171
Fungi_Release38	paxillus_involutus_atcc_200175	A	0.1934	0.163	0.2348	0.2099	0.2086	0.2307	0.1823	0.2362	0.1934	0.2293	0.2044	0.2362	0.2058	0.2265	0.2155	0.2238	0.1878	0.2017	0.2003	0.1754	0.203	0.2569	0.2307	0.232	0.1948	0.2514	0.2099	0.232	0.2583	0.2155	0.2224	0.2169	0.261	0.261	0.2818	0.2099	0.2251	0.2693	0.2417	0.174	0.1865	0.1727	0.2348	0.2169	0.2541	0.2182	0.3619
Fungi_Release38	paxillus_involutus_atcc_200175	C	0.2403	0.2155	0.2113	0.232	0.1989	0.1934	0.2445	0.232	0.2749	0.232	0.2238	0.2334	0.2265	0.2693	0.2569	0.239	0.2127	0.3135	0.2196	0.2472	0.239	0.2417	0.2334	0.2403	0.2472	0.25	0.2597	0.2224	0.2445	0.2334	0.2293	0.2279	0.2099	0.2486	0.2569	0.2514	0.1975	0.1989	0.2127	0.1906	0.1285	0.0925	0.087	0.1174	0.1105	0.1727	0.1298
Fungi_Release38	paxillus_involutus_atcc_200175	G	0.3066	0.2983	0.2541	0.2541	0.2914	0.2569	0.2528	0.2652	0.2224	0.2528	0.2541	0.2196	0.2182	0.2279	0.1975	0.232	0.3232	0.1948	0.2431	0.2334	0.2901	0.2113	0.2901	0.2307	0.2776	0.2528	0.2044	0.2555	0.239	0.2528	0.2196	0.2721	0.2293	0.2003	0.1892	0.2086	0.2707	0.2459	0.2873	0.4047	0.5345	0.6133	0.5428	0.5055	0.5083	0.4337	0.4075
Fungi_Release38	paxillus_involutus_atcc_200175	T	0.2597	0.3232	0.2997	0.3039	0.3011	0.3191	0.3204	0.2666	0.3094	0.2859	0.3177	0.3108	0.3494	0.2762	0.3301	0.3052	0.2762	0.2901	0.337	0.3439	0.268	0.2901	0.2459	0.297	0.2804	0.2459	0.326	0.2901	0.2583	0.2983	0.3287	0.2831	0.2997	0.2901	0.2721	0.3301	0.3066	0.2859	0.2583	0.2307	0.1506	0.1215	0.1354	0.1602	0.1271	0.1754	0.1008
Fungi_Release38	cryptococcus_gattii_ca1280	A	0.2316	0.2427	0.2483	0.2441	0.2399	0.2219	0.2316	0.2122	0.215	0.2178	0.2386	0.2621	0.2621	0.2288	0.2718	0.258	0.2566	0.2441	0.2802	0.2691	0.2677	0.3051	0.2913	0.2982	0.2954	0.2746	0.2857	0.3315	0.3121	0.3162	0.2788	0.2816	0.258	0.2691	0.2552	0.2829	0.2774	0.294	0.2954	0.1956	0.2233	0.208	0.1914	0.2219	0.2621	0.3037	0.4799
Fungi_Release38	cryptococcus_gattii_ca1280	C	0.1872	0.1789	0.1748	0.1831	0.1969	0.1886	0.2441	0.2053	0.1845	0.2219	0.258	0.1914	0.2316	0.19	0.2039	0.1983	0.2039	0.208	0.1859	0.1886	0.1914	0.1734	0.1567	0.1484	0.1664	0.1859	0.1859	0.1678	0.2025	0.1734	0.1969	0.2053	0.2233	0.1983	0.2275	0.1872	0.1581	0.1581	0.1595	0.1595	0.0971	0.0735	0.0777	0.0721	0.0777	0.1026	0.0527
Fungi_Release38	cryptococcus_gattii_ca1280	G	0.2607	0.233	0.2275	0.2316	0.2094	0.1845	0.2011	0.2039	0.2233	0.2011	0.208	0.2067	0.2136	0.2275	0.1969	0.2136	0.2288	0.2233	0.2358	0.2275	0.2538	0.2399	0.2399	0.2663	0.2732	0.2746	0.2441	0.2358	0.2288	0.2427	0.2386	0.251	0.2538	0.2524	0.2122	0.2427	0.2635	0.2566	0.2954	0.3745	0.5076	0.577	0.5922	0.5257	0.5229	0.3981	0.3523
Fungi_Release38	cryptococcus_gattii_ca1280	T	0.3204	0.3454	0.3495	0.3412	0.3537	0.405	0.3232	0.3786	0.3773	0.3592	0.2954	0.3398	0.2926	0.3537	0.3273	0.3301	0.3107	0.3245	0.2982	0.3148	0.2871	0.2816	0.3121	0.2871	0.2649	0.2649	0.2843	0.2649	0.2566	0.2677	0.2857	0.2621	0.2649	0.2802	0.3051	0.2871	0.301	0.2913	0.2497	0.2705	0.172	0.1415	0.1387	0.1803	0.1373	0.1956	0.1151
Fungi_Release38	gaeumannomyces_graminis	A	0.2402	0.1941	0.2193	0.2263	0.2193	0.2556	0.2039	0.2039	0.2123	0.2221	0.2388	0.2277	0.2207	0.2444	0.2235	0.236	0.236	0.2109	0.2207	0.2332	0.2053	0.2151	0.2235	0.2277	0.2402	0.2514	0.2304	0.2472	0.2221	0.2793	0.25	0.2514	0.2472	0.2709	0.2277	0.2151	0.2053	0.2039	0.183	0.1397	0.1997	0.2249	0.2221	0.2402	0.2514	0.3198	0.4679
Fungi_Release38	gaeumannomyces_graminis	C	0.3087	0.2849	0.2793	0.3017	0.2542	0.2528	0.2891	0.2556	0.2444	0.2793	0.2807	0.25	0.2835	0.2626	0.2835	0.2514	0.2668	0.2877	0.2821	0.2654	0.264	0.2779	0.2668	0.2542	0.2835	0.2514	0.2849	0.264	0.3003	0.236	0.2863	0.2835	0.2891	0.2696	0.264	0.257	0.2458	0.2514	0.2514	0.2709	0.162	0.1159	0.1411	0.1578	0.1746	0.1355	0.1522
Fungi_Release38	gaeumannomyces_graminis	G	0.2514	0.2891	0.2486	0.2709	0.2779	0.2598	0.2905	0.2989	0.3073	0.2709	0.2528	0.2668	0.2807	0.2416	0.2668	0.2598	0.2696	0.2696	0.2626	0.2751	0.3128	0.2765	0.2793	0.2947	0.2612	0.264	0.2723	0.243	0.2346	0.2444	0.2416	0.2151	0.2556	0.2332	0.2542	0.2891	0.3087	0.345	0.3617	0.4022	0.5475	0.5545	0.5461	0.507	0.4735	0.3925	0.3338
Fungi_Release38	gaeumannomyces_graminis	T	0.1997	0.2318	0.2528	0.2011	0.2486	0.2318	0.2165	0.2416	0.236	0.2277	0.2277	0.2556	0.2151	0.2514	0.2263	0.2528	0.2277	0.2318	0.2346	0.2263	0.2179	0.2304	0.2304	0.2235	0.2151	0.2332	0.2123	0.2458	0.243	0.2402	0.2221	0.25	0.2081	0.2263	0.2542	0.2388	0.2402	0.1997	0.2039	0.1872	0.0908	0.1047	0.0908	0.095	0.1006	0.1522	0.0461
Fungi_Release38	verticillium_longisporum	A	0.2017	0.2088	0.1861	0.1903	0.2074	0.1619	0.2131	0.2074	0.1875	0.2358	0.2188	0.2301	0.2372	0.2102	0.1989	0.2273	0.1946	0.2599	0.2386	0.2074	0.2188	0.2429	0.223	0.2372	0.2642	0.2472	0.2571	0.2244	0.2685	0.25	0.1989	0.2244	0.2543	0.2543	0.2486	0.2429	0.2628	0.223	0.2642	0.2386	0.2585	0.233	0.2259	0.1634	0.1818	0.25	0.3636
Fungi_Release38	verticillium_longisporum	C	0.2955	0.2798	0.2841	0.2557	0.2699	0.2912	0.2898	0.2955	0.3338	0.2571	0.2812	0.2926	0.2841	0.2869	0.2855	0.2656	0.2699	0.2401	0.2741	0.2841	0.2585	0.2415	0.2955	0.2585	0.2386	0.2713	0.2457	0.2827	0.2514	0.2841	0.294	0.2713	0.2131	0.2869	0.2713	0.2741	0.2443	0.2855	0.2656	0.2543	0.1804	0.1548	0.1009	0.1364	0.1207	0.1634	0.1719
Fungi_Release38	verticillium_longisporum	G	0.2415	0.2713	0.2685	0.2926	0.2983	0.3111	0.2514	0.2571	0.2642	0.2571	0.2585	0.2798	0.2528	0.2614	0.2784	0.2756	0.3068	0.2614	0.2528	0.2784	0.2969	0.304	0.2628	0.2926	0.2841	0.2969	0.3011	0.2557	0.2642	0.2727	0.2656	0.2614	0.2969	0.2372	0.2372	0.2472	0.2585	0.2855	0.2812	0.3253	0.4531	0.5099	0.5682	0.5781	0.5938	0.4645	0.4048
Fungi_Release38	verticillium_longisporum	T	0.2614	0.2401	0.2614	0.2614	0.2244	0.2358	0.2457	0.2401	0.2145	0.25	0.2415	0.1974	0.2259	0.2415	0.2372	0.2315	0.2287	0.2386	0.2344	0.2301	0.2259	0.2116	0.2188	0.2116	0.2131	0.1847	0.196	0.2372	0.2159	0.1932	0.2415	0.2429	0.2358	0.2216	0.2429	0.2358	0.2344	0.206	0.1889	0.1818	0.108	0.1023	0.1051	0.1222	0.1037	0.1222	0.0597
Fungi_Release38	serendipita_vermifera_maff_305830	A	0.2265	0.2179	0.2051	0.2222	0.2179	0.265	0.2265	0.2692	0.235	0.2379	0.2635	0.2578	0.2308	0.2265	0.235	0.2365	0.2322	0.2422	0.2593	0.2422	0.2564	0.265	0.2621	0.2393	0.265	0.2593	0.2578	0.2422	0.2764	0.2892	0.235	0.2635	0.2464	0.2792	0.2493	0.2621	0.3105	0.3561	0.3162	0.1994	0.188	0.2094	0.1823	0.1823	0.2222	0.235	0.4744
Fungi_Release38	serendipita_vermifera_maff_305830	C	0.1652	0.1652	0.1581	0.1923	0.1937	0.1866	0.2179	0.1952	0.2108	0.2593	0.2621	0.2094	0.2393	0.2479	0.2436	0.2236	0.255	0.2179	0.2407	0.235	0.2179	0.2251	0.2051	0.2308	0.1937	0.2137	0.2236	0.2493	0.2407	0.2293	0.2251	0.2222	0.2393	0.2422	0.2507	0.2521	0.2308	0.1966	0.235	0.2279	0.1296	0.0826	0.0869	0.1068	0.1125	0.1239	0.104
Fungi_Release38	serendipita_vermifera_maff_305830	G	0.3234	0.3148	0.3105	0.2692	0.2792	0.2422	0.2236	0.1937	0.2308	0.1809	0.1396	0.1838	0.2066	0.1724	0.1994	0.1923	0.1952	0.2023	0.1895	0.2066	0.2023	0.2094	0.2222	0.2023	0.208	0.2336	0.2165	0.2137	0.1652	0.1752	0.2123	0.1923	0.1937	0.1496	0.1652	0.1524	0.1681	0.1895	0.2066	0.2977	0.4929	0.567	0.6026	0.5513	0.5427	0.416	0.3333
Fungi_Release38	serendipita_vermifera_maff_305830	T	0.2849	0.302	0.3262	0.3162	0.3091	0.3063	0.3319	0.3419	0.3234	0.3219	0.3348	0.349	0.3234	0.3533	0.3219	0.3476	0.3177	0.3376	0.3105	0.3162	0.3234	0.3006	0.3105	0.3276	0.3333	0.2934	0.302	0.2949	0.3177	0.3063	0.3276	0.3219	0.3205	0.3291	0.3348	0.3333	0.2906	0.2578	0.2422	0.2749	0.1895	0.141	0.1282	0.1595	0.1225	0.2251	0.0883
Fungi_Release38	phialocephala_scopiformis	A	0.2489	0.2203	0.2432	0.2346	0.2303	0.2403	0.2089	0.2275	0.2074	0.2461	0.2361	0.2432	0.2375	0.2475	0.2518	0.2532	0.2647	0.2775	0.2861	0.2532	0.2632	0.3062	0.2675	0.2947	0.3133	0.2961	0.2947	0.2876	0.3004	0.2589	0.2933	0.2575	0.289	0.2432	0.2618	0.2575	0.2861	0.3047	0.3305	0.2933	0.2575	0.2003	0.176	0.1974	0.2103	0.289	0.4449
Fungi_Release38	phialocephala_scopiformis	C	0.1874	0.1817	0.1831	0.1674	0.1931	0.2003	0.206	0.206	0.2203	0.2432	0.2089	0.2375	0.1946	0.2175	0.2031	0.186	0.2117	0.186	0.1731	0.1917	0.1602	0.1531	0.1788	0.1545	0.1445	0.166	0.1316	0.1545	0.1559	0.1717	0.1674	0.1831	0.1774	0.1602	0.1989	0.2003	0.1917	0.1574	0.1345	0.1545	0.1044	0.0858	0.083	0.0558	0.0658	0.0844	0.0644
Fungi_Release38	phialocephala_scopiformis	G	0.2561	0.269	0.2918	0.2561	0.2532	0.2475	0.2518	0.2232	0.2647	0.206	0.2189	0.2432	0.2246	0.2246	0.2403	0.2589	0.2718	0.2589	0.2303	0.2761	0.2818	0.2675	0.3104	0.3033	0.289	0.289	0.289	0.2961	0.3019	0.2847	0.2589	0.289	0.2332	0.2561	0.2861	0.2661	0.2132	0.2403	0.2518	0.3004	0.4292	0.5436	0.5837	0.5908	0.6266	0.4492	0.4092
Fungi_Release38	phialocephala_scopiformis	T	0.3076	0.329	0.2818	0.3419	0.3233	0.3119	0.3333	0.3433	0.3076	0.3047	0.3362	0.2761	0.3433	0.3104	0.3047	0.3019	0.2518	0.2775	0.3104	0.279	0.2947	0.2732	0.2432	0.2475	0.2532	0.2489	0.2847	0.2618	0.2418	0.2847	0.2804	0.2704	0.3004	0.3405	0.2532	0.2761	0.309	0.2976	0.2833	0.2518	0.2089	0.1702	0.1574	0.1559	0.0973	0.1774	0.0815
Fungi_Release38	rhizopogon_vesiculosus	A	0.2471	0.2586	0.2256	0.2313	0.2371	0.2227	0.2112	0.2256	0.1968	0.2141	0.2184	0.2385	0.204	0.25	0.2399	0.2141	0.2055	0.1882	0.194	0.217	0.2572	0.2428	0.2414	0.2399	0.2486	0.2213	0.2428	0.2644	0.2313	0.25	0.227	0.2658	0.2557	0.2557	0.2701	0.2615	0.2586	0.2716	0.2687	0.1925	0.2184	0.2011	0.158	0.2112	0.181	0.2112	0.4066
Fungi_Release38	rhizopogon_vesiculosus	C	0.1394	0.1897	0.1509	0.1911	0.2098	0.2141	0.2414	0.2557	0.2443	0.2313	0.2543	0.2299	0.2629	0.2644	0.2198	0.2471	0.2414	0.2414	0.2299	0.2342	0.2112	0.2356	0.1753	0.2371	0.2098	0.2385	0.2256	0.227	0.2083	0.2557	0.2112	0.2443	0.2184	0.217	0.2313	0.1925	0.1882	0.1983	0.1925	0.194	0.1322	0.0876	0.102	0.0704	0.1121	0.125	0.0862
Fungi_Release38	rhizopogon_vesiculosus	G	0.3247	0.2701	0.2787	0.2443	0.2414	0.2299	0.2155	0.1753	0.1925	0.1782	0.1796	0.1911	0.1882	0.1509	0.1667	0.1954	0.1652	0.194	0.1882	0.2155	0.1983	0.1925	0.2529	0.2213	0.2557	0.25	0.2112	0.217	0.2284	0.2213	0.227	0.1624	0.1796	0.2055	0.1681	0.1839	0.2198	0.2529	0.2557	0.2917	0.4914	0.5747	0.5905	0.5172	0.5675	0.4555	0.398
Fungi_Release38	rhizopogon_vesiculosus	T	0.2888	0.2816	0.3448	0.3333	0.3118	0.3333	0.3319	0.3434	0.3664	0.3764	0.3477	0.3405	0.3448	0.3348	0.3736	0.3434	0.3879	0.3764	0.3879	0.3333	0.3333	0.329	0.3305	0.3017	0.2859	0.2902	0.3204	0.2917	0.3319	0.273	0.3348	0.3276	0.3463	0.3218	0.3305	0.3621	0.3333	0.2773	0.283	0.3218	0.158	0.1365	0.1494	0.2011	0.1394	0.2083	0.1092
Fungi_Release38	puccinia_striiformis	A	0.2824	0.2897	0.2606	0.2897	0.2504	0.2868	0.2955	0.2664	0.3086	0.2999	0.2824	0.2897	0.3115	0.2838	0.2693	0.2926	0.3173	0.2737	0.2576	0.2489	0.2562	0.2737	0.2664	0.2445	0.2649	0.2183	0.2285	0.2518	0.2169	0.2344	0.1965	0.2023	0.1994	0.2009	0.1921	0.1601	0.1456	0.1354	0.1033	0.0888	0.1718	0.1892	0.2198	0.2882	0.3261	0.3319	0.5502
Fungi_Release38	puccinia_striiformis	C	0.2082	0.2358	0.2242	0.214	0.2052	0.2183	0.2154	0.2358	0.2067	0.2213	0.2082	0.1892	0.198	0.198	0.179	0.2125	0.1689	0.1703	0.2023	0.214	0.1965	0.1805	0.1761	0.2358	0.163	0.1921	0.179	0.1689	0.2067	0.1921	0.1878	0.1689	0.1892	0.1645	0.1965	0.1718	0.1645	0.1499	0.1499	0.1194	0.0539	0.0495	0.0655	0.0655	0.0786	0.1063	0.0568
Fungi_Release38	puccinia_striiformis	G	0.1689	0.1659	0.1907	0.182	0.2154	0.1703	0.1659	0.1878	0.1776	0.1732	0.1863	0.1921	0.1936	0.182	0.1747	0.1601	0.182	0.1834	0.2023	0.182	0.1907	0.1907	0.1703	0.1761	0.1514	0.1601	0.1703	0.1383	0.1295	0.1587	0.1659	0.163	0.1557	0.1761	0.1761	0.2213	0.2751	0.3319	0.3785	0.4571	0.6303	0.6012	0.5575	0.4556	0.4192	0.3377	0.2504
Fungi_Release38	puccinia_striiformis	T	0.3406	0.3086	0.3246	0.3144	0.329	0.3246	0.3231	0.31	0.3071	0.3057	0.3231	0.329	0.2969	0.3362	0.377	0.3348	0.3319	0.3726	0.3377	0.3552	0.3566	0.3552	0.3872	0.3435	0.4207	0.4294	0.4221	0.441	0.4469	0.4148	0.4498	0.4658	0.4556	0.4585	0.4352	0.4469	0.4148	0.3828	0.3683	0.3348	0.1441	0.1601	0.1572	0.1907	0.1761	0.2242	0.1426
Fungi_Release38	absidia_glauca	A	0.3324	0.3368	0.3412	0.3206	0.3265	0.3103	0.3515	0.2985	0.3426	0.3426	0.3118	0.3235	0.3088	0.2706	0.2985	0.3088	0.2941	0.3206	0.3029	0.2824	0.2985	0.2618	0.2471	0.2588	0.2544	0.2426	0.2809	0.2191	0.2441	0.2074	0.2147	0.2029	0.1985	0.1721	0.1529	0.1603	0.1529	0.1368	0.125	0.0956	0.1279	0.1353	0.1574	0.2353	0.2471	0.3721	0.5544
Fungi_Release38	absidia_glauca	C	0.175	0.2029	0.1618	0.2	0.1853	0.1794	0.1779	0.2118	0.1941	0.1956	0.1912	0.1897	0.2029	0.2235	0.2074	0.1985	0.2368	0.2074	0.2147	0.2191	0.2338	0.2515	0.2824	0.2176	0.2132	0.2103	0.2029	0.2279	0.2103	0.2029	0.1838	0.1838	0.1735	0.1941	0.1529	0.1176	0.1368	0.1279	0.1029	0.1088	0.0618	0.0603	0.0515	0.0824	0.0897	0.0941	0.0706
Fungi_Release38	absidia_glauca	G	0.225	0.2118	0.225	0.2221	0.2176	0.2353	0.2132	0.2265	0.2294	0.2176	0.2044	0.2191	0.2132	0.2132	0.2162	0.1809	0.2265	0.1941	0.1735	0.1838	0.1765	0.1574	0.1529	0.1515	0.1676	0.1456	0.1574	0.1412	0.1412	0.175	0.1441	0.1456	0.1706	0.1603	0.1926	0.2353	0.2603	0.3162	0.3897	0.4588	0.6206	0.6574	0.6676	0.525	0.5015	0.3029	0.2368
Fungi_Release38	absidia_glauca	T	0.2676	0.2485	0.2721	0.2574	0.2706	0.275	0.2574	0.2632	0.2338	0.2441	0.2926	0.2676	0.275	0.2926	0.2779	0.3118	0.2426	0.2779	0.3088	0.3147	0.2912	0.3294	0.3176	0.3721	0.3647	0.4015	0.3588	0.4118	0.4044	0.4147	0.4574	0.4676	0.4574	0.4735	0.5015	0.4868	0.45	0.4191	0.3824	0.3368	0.1897	0.1471	0.1235	0.1574	0.1618	0.2309	0.1382
Fungi_Release38	serpula_lacrymans_var_lacrymans_s7_9	A	0.2338	0.2397	0.2456	0.2426	0.225	0.2221	0.2103	0.2162	0.2574	0.225	0.2353	0.2279	0.2324	0.2324	0.2485	0.2544	0.2426	0.25	0.2618	0.2485	0.2397	0.2603	0.275	0.2529	0.2324	0.2691	0.2706	0.2794	0.2588	0.2632	0.2824	0.2735	0.2941	0.25	0.2529	0.2647	0.3147	0.2632	0.2426	0.1809	0.2147	0.1426	0.1912	0.2221	0.2485	0.2706	0.4765
Fungi_Release38	serpula_lacrymans_var_lacrymans_s7_9	C	0.1882	0.1971	0.2059	0.2029	0.2309	0.1926	0.2279	0.2309	0.2309	0.2162	0.1926	0.1985	0.2206	0.2279	0.2338	0.1971	0.1897	0.2426	0.1971	0.2132	0.1985	0.1956	0.1647	0.2088	0.2103	0.2059	0.1882	0.2162	0.1985	0.1971	0.1735	0.2103	0.2	0.2162	0.1985	0.2118	0.1838	0.1838	0.1721	0.1662	0.0794	0.0941	0.0853	0.0632	0.0985	0.1088	0.0765
Fungi_Release38	serpula_lacrymans_var_lacrymans_s7_9	G	0.2603	0.225	0.2221	0.2162	0.2088	0.2162	0.2088	0.1897	0.1691	0.1882	0.2088	0.1912	0.2029	0.1676	0.1868	0.1912	0.1897	0.1897	0.2015	0.1941	0.2265	0.2191	0.2309	0.225	0.2426	0.2	0.1956	0.2074	0.1985	0.1838	0.1912	0.1853	0.1853	0.1706	0.1853	0.2044	0.1926	0.2353	0.2632	0.3441	0.5412	0.5985	0.5676	0.5353	0.5235	0.4	0.3309
Fungi_Release38	serpula_lacrymans_var_lacrymans_s7_9	T	0.3176	0.3382	0.3265	0.3382	0.3353	0.3691	0.3529	0.3632	0.3426	0.3706	0.3632	0.3824	0.3441	0.3721	0.3309	0.3574	0.3779	0.3176	0.3397	0.3441	0.3353	0.325	0.3294	0.3132	0.3147	0.325	0.3456	0.2971	0.3441	0.3559	0.3529	0.3309	0.3206	0.3632	0.3632	0.3191	0.3088	0.3176	0.3221	0.3088	0.1647	0.1647	0.1559	0.1794	0.1294	0.2206	0.1162
Fungi_Release38	agaricus_bisporus_var_burnettii_jb137_s8	A	0.2003	0.19	0.2283	0.2121	0.2504	0.2253	0.2062	0.2165	0.2106	0.2091	0.2091	0.1915	0.2135	0.1841	0.2194	0.2312	0.2121	0.2194	0.2224	0.2047	0.2636	0.2445	0.3004	0.2769	0.2445	0.2327	0.2666	0.2725	0.2504	0.3078	0.2474	0.2857	0.271	0.2666	0.2459	0.2842	0.3063	0.299	0.2607	0.1767	0.1753	0.2047	0.1811	0.2062	0.2666	0.2769	0.4477
Fungi_Release38	agaricus_bisporus_var_burnettii_jb137_s8	C	0.1517	0.1929	0.1782	0.1723	0.2165	0.2077	0.1959	0.2018	0.2518	0.2239	0.2268	0.2371	0.215	0.2239	0.2386	0.2297	0.2592	0.2135	0.2077	0.2224	0.2062	0.1944	0.1988	0.2032	0.19	0.2297	0.1959	0.1973	0.1959	0.1811	0.1944	0.1797	0.1797	0.2459	0.2047	0.1959	0.1856	0.1679	0.1856	0.1929	0.1311	0.0677	0.0604	0.0839	0.0736	0.0957	0.1105
Fungi_Release38	agaricus_bisporus_var_burnettii_jb137_s8	G	0.2857	0.2769	0.2474	0.2445	0.2165	0.2239	0.2077	0.1738	0.1782	0.19	0.1797	0.1915	0.1856	0.2297	0.1753	0.1605	0.19	0.2003	0.1885	0.2297	0.2106	0.218	0.2018	0.1959	0.2371	0.2194	0.2209	0.2032	0.2401	0.1826	0.2445	0.1738	0.2209	0.162	0.1576	0.1841	0.2047	0.2386	0.2828	0.349	0.514	0.6038	0.6141	0.5641	0.5052	0.3903	0.3063
Fungi_Release38	agaricus_bisporus_var_burnettii_jb137_s8	T	0.3623	0.3402	0.3461	0.3711	0.3166	0.3432	0.3903	0.408	0.3594	0.377	0.3844	0.38	0.3859	0.3623	0.3667	0.3785	0.3387	0.3667	0.3814	0.3432	0.3196	0.3432	0.299	0.324	0.3284	0.3181	0.3166	0.327	0.3137	0.3284	0.3137	0.3608	0.3284	0.3255	0.3918	0.3358	0.3034	0.2946	0.271	0.2813	0.1797	0.1237	0.1443	0.1458	0.1546	0.2371	0.1355
Fungi_Release38	saitoella_complicata_nrrl_y_17804	A	0.1842	0.1738	0.1991	0.211	0.1872	0.2036	0.2036	0.2363	0.2155	0.2259	0.208	0.2214	0.2095	0.2199	0.2244	0.1902	0.2155	0.2407	0.2021	0.2184	0.2199	0.2229	0.26	0.2125	0.26	0.2779	0.2363	0.2541	0.2318	0.2467	0.263	0.1798	0.2377	0.2764	0.2779	0.2823	0.2883	0.3091	0.2288	0.153	0.1783	0.159	0.1679	0.1976	0.2348	0.2199	0.5082
Fungi_Release38	saitoella_complicata_nrrl_y_17804	C	0.214	0.2526	0.2303	0.263	0.2571	0.2422	0.2333	0.2363	0.2779	0.2645	0.2452	0.2422	0.2645	0.2377	0.2526	0.2392	0.1991	0.2155	0.2273	0.1887	0.2006	0.1872	0.1887	0.1768	0.1991	0.1798	0.1783	0.1857	0.1813	0.1842	0.1947	0.2392	0.2051	0.1902	0.2348	0.1813	0.1783	0.1724	0.1842	0.1471	0.0936	0.0802	0.0906	0.1114	0.0669	0.0981	0.0505
Fungi_Release38	saitoella_complicata_nrrl_y_17804	G	0.2897	0.2541	0.2571	0.2511	0.2764	0.2541	0.2318	0.2437	0.2288	0.2585	0.26	0.2645	0.263	0.2645	0.2348	0.2838	0.2897	0.2541	0.2868	0.2868	0.3031	0.3091	0.2912	0.3447	0.3224	0.3239	0.3373	0.3254	0.312	0.2927	0.2823	0.2927	0.2675	0.2645	0.2199	0.2377	0.2912	0.2585	0.3105	0.4294	0.578	0.6122	0.6137	0.526	0.5632	0.4071	0.3685
Fungi_Release38	saitoella_complicata_nrrl_y_17804	T	0.312	0.3195	0.3135	0.2749	0.2793	0.3001	0.3314	0.2838	0.2779	0.2511	0.2868	0.2719	0.263	0.2779	0.2883	0.2868	0.2957	0.2897	0.2838	0.3061	0.2764	0.2808	0.26	0.266	0.2184	0.2184	0.2481	0.2348	0.2749	0.2764	0.26	0.2883	0.2897	0.2689	0.2675	0.2987	0.2422	0.26	0.2764	0.2704	0.1501	0.1486	0.1278	0.1649	0.1352	0.2749	0.0728
Fungi_Release38	verticillium_longisporum_gca_001268145	A	0.1854	0.1958	0.1958	0.2063	0.1913	0.1794	0.2018	0.2227	0.1824	0.2018	0.2063	0.2212	0.2451	0.2048	0.1883	0.2182	0.1854	0.2541	0.2526	0.2347	0.2212	0.2451	0.2347	0.2631	0.2646	0.2272	0.2586	0.2242	0.284	0.2392	0.2347	0.2347	0.2601	0.2631	0.2466	0.2451	0.2661	0.2511	0.3049	0.2436	0.2272	0.2197	0.2018	0.1734	0.1719	0.2631	0.3827
Fungi_Release38	verticillium_longisporum_gca_001268145	C	0.29	0.293	0.2735	0.2586	0.296	0.3034	0.3154	0.2735	0.3064	0.2945	0.29	0.3064	0.299	0.2706	0.2975	0.2451	0.3184	0.2526	0.2765	0.272	0.2616	0.2227	0.2691	0.2511	0.2526	0.2795	0.2302	0.29	0.2496	0.2765	0.2825	0.3004	0.2257	0.3019	0.2825	0.2825	0.2436	0.2945	0.2466	0.2407	0.2048	0.1794	0.0987	0.1061	0.1091	0.1584	0.1465
Fungi_Release38	verticillium_longisporum_gca_001268145	G	0.2691	0.2661	0.284	0.2735	0.272	0.2915	0.2436	0.2347	0.2601	0.2586	0.2706	0.2601	0.2362	0.2556	0.281	0.2855	0.2601	0.2631	0.2287	0.2422	0.2825	0.2945	0.2676	0.2765	0.272	0.287	0.3004	0.2691	0.2691	0.278	0.2317	0.2302	0.3019	0.1973	0.2377	0.2511	0.2511	0.2601	0.2511	0.3064	0.4589	0.5127	0.6069	0.6054	0.6263	0.4469	0.417
Fungi_Release38	verticillium_longisporum_gca_001268145	T	0.2556	0.2451	0.2466	0.2616	0.2407	0.2257	0.2392	0.2691	0.2511	0.2451	0.2332	0.2123	0.2197	0.2691	0.2332	0.2511	0.2362	0.2302	0.2422	0.2511	0.2347	0.2377	0.2287	0.2093	0.2108	0.2063	0.2108	0.2167	0.1973	0.2063	0.2511	0.2347	0.2123	0.2377	0.2332	0.2212	0.2392	0.1943	0.1973	0.2093	0.1091	0.0882	0.0927	0.1151	0.0927	0.1315	0.0538
Fungi_Release38	aspergillus_luchuensis_cbs_106_47	A	0.2231	0.2398	0.2367	0.2231	0.1942	0.2398	0.2428	0.2382	0.2018	0.261	0.258	0.2352	0.2443	0.2337	0.2519	0.2398	0.2686	0.2261	0.2398	0.2443	0.2701	0.2822	0.264	0.2853	0.2443	0.2822	0.2747	0.2428	0.2944	0.2822	0.2671	0.2777	0.2701	0.2671	0.2716	0.264	0.2443	0.2701	0.2671	0.2352	0.2595	0.2231	0.1851	0.1973	0.2458	0.2382	0.4446
Fungi_Release38	aspergillus_luchuensis_cbs_106_47	C	0.2018	0.2064	0.2276	0.22	0.261	0.2231	0.2276	0.2382	0.2367	0.2398	0.2458	0.2519	0.2109	0.2215	0.214	0.217	0.1958	0.2109	0.1821	0.1958	0.2322	0.1851	0.217	0.1958	0.2018	0.217	0.176	0.1882	0.176	0.1745	0.2079	0.2079	0.1942	0.2185	0.2185	0.2185	0.1882	0.1988	0.1912	0.1806	0.1199	0.0865	0.0804	0.0728	0.0637	0.0789	0.0835
Fungi_Release38	aspergillus_luchuensis_cbs_106_47	G	0.2792	0.2458	0.2398	0.2291	0.2458	0.2352	0.2322	0.2307	0.2185	0.2291	0.2018	0.22	0.2261	0.2322	0.2337	0.2428	0.2519	0.2519	0.2944	0.2549	0.2246	0.2322	0.2762	0.2473	0.2504	0.2413	0.2731	0.2382	0.2504	0.2671	0.2504	0.2443	0.2413	0.2261	0.2185	0.2307	0.2838	0.2686	0.2716	0.3414	0.4643	0.5159	0.5781	0.5599	0.5508	0.4522	0.3794
Fungi_Release38	aspergillus_luchuensis_cbs_106_47	T	0.2959	0.308	0.2959	0.3278	0.2989	0.302	0.2974	0.2929	0.3429	0.2701	0.2944	0.2929	0.3187	0.3126	0.3005	0.3005	0.2838	0.3111	0.2838	0.305	0.2731	0.3005	0.2428	0.2716	0.3035	0.2595	0.2762	0.3308	0.2792	0.2762	0.2747	0.2701	0.2944	0.2883	0.2914	0.2868	0.2838	0.2625	0.2701	0.2428	0.1563	0.1745	0.1563	0.17	0.1396	0.2307	0.0926
Fungi_Release38	termitomyces_sp_j132	A	0.2443	0.22	0.2049	0.2261	0.2049	0.214	0.1775	0.1942	0.2291	0.2049	0.2155	0.2398	0.1942	0.1942	0.2352	0.1988	0.2382	0.2064	0.2215	0.2458	0.2519	0.22	0.2443	0.2352	0.2413	0.2473	0.2656	0.2716	0.2307	0.2337	0.2473	0.2246	0.2352	0.2473	0.2549	0.2398	0.261	0.258	0.2731	0.2185	0.1851	0.2033	0.1684	0.1973	0.22	0.2109	0.3505
Fungi_Release38	termitomyces_sp_j132	C	0.1457	0.1775	0.1897	0.1927	0.1942	0.1836	0.2276	0.2231	0.2033	0.2003	0.2291	0.22	0.2428	0.2307	0.2276	0.2398	0.2124	0.2595	0.2064	0.2003	0.2337	0.2003	0.1821	0.2079	0.2109	0.217	0.1851	0.1988	0.2033	0.2276	0.1958	0.2049	0.2337	0.1973	0.2094	0.2291	0.1882	0.1806	0.1715	0.1639	0.1108	0.0895	0.0653	0.0835	0.0728	0.1457	0.0971
Fungi_Release38	termitomyces_sp_j132	G	0.2898	0.3035	0.258	0.2413	0.2428	0.2504	0.2473	0.2246	0.2231	0.2519	0.2291	0.2079	0.2109	0.2413	0.1973	0.2064	0.2064	0.1866	0.22	0.2231	0.2003	0.2246	0.2671	0.2443	0.2458	0.22	0.2489	0.2382	0.2322	0.2367	0.2382	0.214	0.2367	0.2367	0.2049	0.22	0.2398	0.2519	0.2898	0.3035	0.5341	0.5827	0.6297	0.5129	0.5539	0.4416	0.4219
Fungi_Release38	termitomyces_sp_j132	T	0.3202	0.2989	0.3475	0.3399	0.3581	0.352	0.3475	0.3581	0.3445	0.3429	0.3263	0.3323	0.352	0.3338	0.3399	0.3551	0.3429	0.3475	0.352	0.3308	0.3141	0.3551	0.3065	0.3126	0.302	0.3156	0.3005	0.2914	0.3338	0.302	0.3187	0.3566	0.2944	0.3187	0.3308	0.3111	0.3111	0.3096	0.2656	0.3141	0.17	0.1244	0.1366	0.2064	0.1533	0.2018	0.1305
Fungi_Release38	gymnopus_luxurians_fd_317_m1	A	0.2381	0.235	0.2212	0.2012	0.2258	0.2151	0.2243	0.2304	0.2412	0.2043	0.2535	0.2504	0.2488	0.2535	0.2089	0.2519	0.2181	0.2826	0.2289	0.2734	0.2611	0.2888	0.2473	0.2734	0.2734	0.2642	0.2627	0.2734	0.2611	0.2673	0.2734	0.2227	0.2704	0.2504	0.2473	0.2642	0.2765	0.2596	0.2381	0.1859	0.2151	0.1828	0.1982	0.192	0.2273	0.2289	0.4194
Fungi_Release38	gymnopus_luxurians_fd_317_m1	C	0.1951	0.1797	0.2166	0.1859	0.2458	0.2135	0.2458	0.2074	0.2166	0.2212	0.2028	0.1905	0.2289	0.2212	0.2089	0.2151	0.2227	0.1935	0.2135	0.1966	0.2012	0.1905	0.212	0.2074	0.212	0.172	0.212	0.2212	0.212	0.2197	0.2304	0.2104	0.2212	0.2289	0.2366	0.2304	0.2166	0.1951	0.1767	0.1813	0.1121	0.0906	0.0737	0.1106	0.0737	0.1183	0.0829
Fungi_Release38	gymnopus_luxurians_fd_317_m1	G	0.2719	0.2166	0.2427	0.2473	0.1966	0.2304	0.1797	0.1905	0.1813	0.1982	0.1859	0.2089	0.2012	0.1859	0.2089	0.2089	0.2104	0.1905	0.2089	0.2335	0.2089	0.2304	0.2166	0.2058	0.1828	0.2212	0.2151	0.212	0.1797	0.2074	0.1859	0.1935	0.1966	0.172	0.1797	0.1982	0.1843	0.2227	0.2596	0.3241	0.4762	0.5699	0.5837	0.5161	0.576	0.4178	0.3978
Fungi_Release38	gymnopus_luxurians_fd_317_m1	T	0.2949	0.3687	0.3195	0.3656	0.3318	0.341	0.3502	0.3717	0.361	0.3763	0.3579	0.3502	0.321	0.3395	0.3733	0.3241	0.3487	0.3333	0.3487	0.2965	0.3287	0.2903	0.3241	0.3134	0.3318	0.3425	0.3103	0.2934	0.3472	0.3057	0.3103	0.3733	0.3118	0.3487	0.3364	0.3072	0.3226	0.3226	0.3257	0.3088	0.1966	0.1567	0.1444	0.1813	0.1229	0.235	0.0998
Fungi_Release38	madurella_mycetomatis	A	0.1757	0.228	0.2096	0.2003	0.2111	0.168	0.1911	0.1941	0.1864	0.2065	0.1972	0.1941	0.1911	0.1988	0.1911	0.2311	0.2512	0.225	0.228	0.2219	0.2357	0.2465	0.228	0.228	0.2666	0.2219	0.2527	0.2542	0.2666	0.2388	0.2219	0.2435	0.2465	0.2696	0.2157	0.2496	0.2435	0.2974	0.2388	0.208	0.1926	0.1602	0.151	0.2049	0.2542	0.2912	0.4422
Fungi_Release38	madurella_mycetomatis	C	0.2727	0.2481	0.2943	0.2851	0.2712	0.302	0.2958	0.2851	0.2681	0.2573	0.265	0.2958	0.2727	0.2311	0.2989	0.2866	0.265	0.2604	0.2157	0.2203	0.2558	0.2589	0.2234	0.225	0.2542	0.2265	0.2173	0.2173	0.2481	0.2558	0.2789	0.2096	0.2542	0.225	0.2604	0.2203	0.2049	0.2296	0.2712	0.2419	0.1602	0.1248	0.1433	0.094	0.1002	0.1171	0.1433
Fungi_Release38	madurella_mycetomatis	G	0.2558	0.2727	0.228	0.2481	0.2527	0.2666	0.2373	0.2481	0.2619	0.3082	0.2573	0.2589	0.2712	0.3005	0.2989	0.2404	0.2558	0.3174	0.3035	0.3143	0.2727	0.2758	0.3297	0.3267	0.2789	0.3313	0.2851	0.3143	0.2666	0.265	0.2712	0.3035	0.2435	0.2296	0.2743	0.245	0.2974	0.2743	0.3051	0.3636	0.4961	0.6302	0.5624	0.584	0.5347	0.4792	0.3606
Fungi_Release38	madurella_mycetomatis	T	0.2958	0.2512	0.2681	0.2666	0.265	0.2635	0.2758	0.2727	0.2835	0.228	0.2804	0.2512	0.265	0.2696	0.2111	0.2419	0.228	0.1972	0.2527	0.2435	0.2357	0.2188	0.2188	0.2203	0.2003	0.2203	0.245	0.2142	0.2188	0.2404	0.228	0.2435	0.2558	0.2758	0.2496	0.2851	0.2542	0.1988	0.1849	0.1864	0.151	0.0847	0.1433	0.1171	0.1109	0.1125	0.0539
Fungi_Release38	fusarium_solani	A	0.2356	0.2215	0.2621	0.2465	0.22	0.2559	0.2496	0.2465	0.1997	0.2215	0.2527	0.234	0.2527	0.2699	0.2387	0.2184	0.2496	0.2559	0.2496	0.2512	0.2559	0.273	0.2496	0.2652	0.2215	0.2715	0.2652	0.2621	0.2761	0.2824	0.2808	0.2808	0.2964	0.2808	0.248	0.3027	0.2559	0.2793	0.2964	0.2371	0.2605	0.2246	0.2044	0.1794	0.2402	0.2356	0.4119
Fungi_Release38	fusarium_solani	C	0.2512	0.2278	0.2215	0.2527	0.234	0.2387	0.2559	0.2621	0.2793	0.2871	0.2465	0.2543	0.2559	0.2574	0.2387	0.2683	0.2668	0.2168	0.2168	0.248	0.2496	0.181	0.2418	0.2184	0.2106	0.2246	0.2262	0.2044	0.2387	0.2028	0.2106	0.2356	0.2449	0.2559	0.2621	0.2231	0.2621	0.2044	0.2184	0.2106	0.1685	0.1357	0.0998	0.0983	0.1092	0.1108	0.1342
Fungi_Release38	fusarium_solani	G	0.273	0.2917	0.2512	0.2527	0.2824	0.2434	0.2184	0.2387	0.2371	0.1794	0.1856	0.2574	0.2449	0.2309	0.2293	0.2028	0.1966	0.2777	0.2418	0.234	0.2309	0.2543	0.273	0.2871	0.2886	0.2637	0.2715	0.2605	0.248	0.2652	0.2402	0.2449	0.2293	0.1934	0.2387	0.2153	0.22	0.259	0.248	0.3229	0.4165	0.4914	0.5757	0.5866	0.5273	0.4477	0.3697
Fungi_Release38	fusarium_solani	T	0.2402	0.259	0.2652	0.248	0.2637	0.2621	0.2761	0.2527	0.2839	0.312	0.3151	0.2543	0.2465	0.2418	0.2933	0.3105	0.2871	0.2496	0.2917	0.2668	0.2637	0.2917	0.2356	0.2293	0.2793	0.2402	0.2371	0.273	0.2371	0.2496	0.2683	0.2387	0.2293	0.2699	0.2512	0.259	0.2621	0.2574	0.2371	0.2293	0.1544	0.1482	0.1201	0.1357	0.1232	0.2059	0.0842
Fungi_Release38	drechslerella_stenobrocha_248	A	0.1852	0.2119	0.2119	0.2072	0.2151	0.2151	0.2119	0.2151	0.1978	0.2198	0.2418	0.2496	0.2402	0.2418	0.2308	0.2386	0.2151	0.2057	0.248	0.2512	0.2229	0.2276	0.2292	0.2684	0.237	0.259	0.2418	0.2716	0.2386	0.2559	0.2496	0.3014	0.2527	0.2323	0.2527	0.2214	0.2198	0.2386	0.1994	0.1272	0.1366	0.1272	0.1476	0.19	0.2308	0.2261	0.4992
Fungi_Release38	drechslerella_stenobrocha_248	C	0.2622	0.2449	0.2716	0.2465	0.2198	0.2433	0.2292	0.248	0.2527	0.2308	0.2072	0.2465	0.2214	0.2198	0.1978	0.2292	0.1915	0.2104	0.1837	0.2135	0.1962	0.2057	0.2041	0.1915	0.2214	0.2229	0.2104	0.2245	0.2245	0.2182	0.2323	0.2104	0.2088	0.1962	0.2527	0.2292	0.1821	0.2151	0.1978	0.1962	0.1366	0.0926	0.0926	0.1083	0.1146	0.1146	0.0675
Fungi_Release38	drechslerella_stenobrocha_248	G	0.27	0.2559	0.2308	0.2323	0.259	0.2512	0.2716	0.2653	0.2716	0.2637	0.281	0.2402	0.2527	0.2669	0.2637	0.2512	0.2873	0.2951	0.2889	0.2936	0.3014	0.2889	0.2904	0.2951	0.2936	0.2669	0.2983	0.2527	0.2543	0.2669	0.248	0.2041	0.2496	0.2386	0.2606	0.2418	0.3155	0.2983	0.3532	0.4411	0.5965	0.6499	0.6641	0.5557	0.5196	0.3862	0.3783
Fungi_Release38	drechslerella_stenobrocha_248	T	0.2826	0.2873	0.2857	0.314	0.3061	0.2904	0.2873	0.2716	0.2779	0.2857	0.27	0.2637	0.2857	0.2716	0.3077	0.281	0.3061	0.2889	0.2794	0.2418	0.2794	0.2779	0.2763	0.2449	0.248	0.2512	0.2496	0.2512	0.2826	0.259	0.27	0.2841	0.2889	0.3328	0.2339	0.3077	0.2826	0.248	0.2496	0.2355	0.1303	0.1303	0.0958	0.146	0.135	0.2732	0.0549
Fungi_Release38	aspergillus_tubingensis_cbs_134_48	A	0.2563	0.2233	0.2217	0.2296	0.228	0.2437	0.2469	0.2296	0.2107	0.2704	0.2248	0.1934	0.2343	0.2469	0.2626	0.2642	0.2799	0.2358	0.25	0.2563	0.2594	0.2531	0.272	0.2736	0.2421	0.2469	0.2531	0.2469	0.283	0.2877	0.2783	0.2799	0.2736	0.261	0.2453	0.2547	0.2516	0.2642	0.261	0.2358	0.2877	0.228	0.1918	0.1934	0.2406	0.2547	0.4607
Fungi_Release38	aspergillus_tubingensis_cbs_134_48	C	0.2044	0.2248	0.2374	0.2107	0.217	0.2531	0.206	0.2421	0.2421	0.2311	0.2453	0.2594	0.2421	0.2296	0.2201	0.1777	0.2233	0.2233	0.195	0.2075	0.2374	0.2075	0.1965	0.2233	0.2028	0.2437	0.2091	0.206	0.1855	0.184	0.2107	0.1824	0.1918	0.228	0.2013	0.2201	0.1918	0.1934	0.184	0.184	0.1101	0.0943	0.0739	0.0818	0.0582	0.0786	0.0818
Fungi_Release38	aspergillus_tubingensis_cbs_134_48	G	0.2374	0.2673	0.239	0.2264	0.2579	0.2186	0.2186	0.2123	0.2013	0.2186	0.2421	0.2437	0.2201	0.2374	0.2091	0.2925	0.2516	0.2642	0.2987	0.2594	0.2531	0.2453	0.2673	0.2594	0.2469	0.2579	0.2689	0.2469	0.2642	0.2642	0.2327	0.2594	0.2516	0.2248	0.2406	0.2594	0.261	0.2626	0.3019	0.3333	0.445	0.4906	0.5597	0.566	0.5912	0.434	0.3726
Fungi_Release38	aspergillus_tubingensis_cbs_134_48	T	0.3019	0.2846	0.3019	0.3333	0.2972	0.2846	0.3286	0.316	0.3459	0.2799	0.2877	0.3035	0.3035	0.2862	0.3082	0.2657	0.2453	0.2767	0.2563	0.2767	0.25	0.294	0.2642	0.2437	0.3082	0.2516	0.2689	0.3003	0.2673	0.2642	0.2783	0.2783	0.283	0.2862	0.3129	0.2657	0.2956	0.2799	0.2531	0.2469	0.1572	0.1871	0.1745	0.1588	0.1101	0.2327	0.0849
Fungi_Release38	talaromyces_marneffei_pm1	A	0.2373	0.2197	0.2309	0.2325	0.2564	0.2277	0.2468	0.242	0.2197	0.2707	0.2325	0.2548	0.2818	0.2707	0.2723	0.2468	0.2691	0.2643	0.2643	0.285	0.2723	0.3217	0.3201	0.2994	0.3073	0.3153	0.3201	0.3217	0.2675	0.285	0.2914	0.3089	0.3153	0.2898	0.2691	0.2675	0.3264	0.258	0.2707	0.2293	0.2691	0.1847	0.1401	0.172	0.2102	0.2771	0.535
Fungi_Release38	talaromyces_marneffei_pm1	C	0.2611	0.2627	0.2707	0.285	0.2596	0.2723	0.2389	0.2675	0.25	0.2325	0.2277	0.2325	0.2086	0.2134	0.2118	0.1895	0.1831	0.1911	0.1545	0.1688	0.1768	0.1561	0.1688	0.199	0.164	0.1545	0.1465	0.1927	0.2086	0.1752	0.2006	0.207	0.1783	0.199	0.2102	0.2118	0.1497	0.1863	0.1608	0.1783	0.1067	0.0924	0.0685	0.051	0.0732	0.0605	0.0589
Fungi_Release38	talaromyces_marneffei_pm1	G	0.1831	0.1847	0.1624	0.1561	0.1624	0.1847	0.1783	0.1736	0.1879	0.1895	0.1943	0.1975	0.1911	0.2229	0.1847	0.2166	0.2357	0.2389	0.2197	0.2404	0.25	0.2389	0.2086	0.2229	0.2548	0.2532	0.2341	0.2166	0.2245	0.2213	0.2197	0.1959	0.2038	0.199	0.1975	0.2229	0.2197	0.2277	0.2659	0.3248	0.4411	0.5494	0.6306	0.6258	0.5876	0.4506	0.3169
Fungi_Release38	talaromyces_marneffei_pm1	T	0.3185	0.3328	0.336	0.3264	0.3217	0.3153	0.336	0.3169	0.3424	0.3073	0.3455	0.3153	0.3185	0.293	0.3312	0.3471	0.3121	0.3057	0.3615	0.3057	0.301	0.2834	0.3025	0.2787	0.2739	0.2771	0.2994	0.2691	0.2994	0.3185	0.2882	0.2882	0.3025	0.3121	0.3232	0.2978	0.3041	0.328	0.3025	0.2675	0.1831	0.1736	0.1608	0.1513	0.129	0.2118	0.0892
Fungi_Release38	marssonina_brunnea_f_sp_multigermtubi_mb_m1	A	0.2472	0.2249	0.1962	0.2169	0.2153	0.26	0.2153	0.2584	0.2344	0.244	0.236	0.2472	0.2233	0.2344	0.244	0.26	0.26	0.2663	0.2584	0.2504	0.2472	0.2743	0.2679	0.2951	0.2648	0.2775	0.2663	0.2376	0.2663	0.3126	0.2711	0.2711	0.26	0.2536	0.244	0.252	0.2616	0.2424	0.2903	0.2344	0.2233	0.1802	0.201	0.2297	0.244	0.2887	0.4641
Fungi_Release38	marssonina_brunnea_f_sp_multigermtubi_mb_m1	C	0.2201	0.2344	0.2297	0.2297	0.236	0.2217	0.252	0.2408	0.2568	0.2791	0.2408	0.2584	0.2265	0.2456	0.236	0.2504	0.244	0.2329	0.1962	0.2137	0.2185	0.1882	0.1834	0.2169	0.2057	0.1818	0.1818	0.1978	0.1898	0.1994	0.2153	0.2297	0.1818	0.2249	0.2217	0.2073	0.2026	0.2233	0.1722	0.201	0.134	0.1021	0.0845	0.067	0.0973	0.1069	0.0877
Fungi_Release38	marssonina_brunnea_f_sp_multigermtubi_mb_m1	G	0.26	0.2951	0.303	0.26	0.2759	0.2727	0.2584	0.2536	0.2743	0.2185	0.2424	0.2392	0.26	0.2297	0.2695	0.2313	0.2663	0.2663	0.3142	0.2951	0.3014	0.2887	0.2855	0.2488	0.2935	0.2967	0.3158	0.3142	0.2982	0.2632	0.2313	0.2568	0.2935	0.2408	0.2616	0.252	0.2759	0.2648	0.2616	0.3429	0.4705	0.5534	0.6172	0.5486	0.5566	0.4115	0.3796
Fungi_Release38	marssonina_brunnea_f_sp_multigermtubi_mb_m1	T	0.2727	0.2456	0.2711	0.2935	0.2727	0.2456	0.2743	0.2472	0.2344	0.2584	0.2807	0.2552	0.2903	0.2903	0.2504	0.2584	0.2297	0.2344	0.2313	0.2408	0.2329	0.2488	0.2632	0.2392	0.236	0.244	0.236	0.2504	0.2456	0.2249	0.2823	0.2424	0.2648	0.2807	0.2727	0.2887	0.26	0.2695	0.2759	0.2217	0.1722	0.1643	0.0973	0.1547	0.1021	0.193	0.0686
Fungi_Release38	dactylellina_haptotyla_cbs_200_50	A	0.2508	0.2685	0.2781	0.3071	0.2797	0.2765	0.2926	0.2878	0.2814	0.2685	0.3199	0.2846	0.3006	0.2749	0.283	0.2878	0.3039	0.3071	0.2814	0.3167	0.2749	0.3039	0.3183	0.2878	0.2942	0.3023	0.3344	0.3199	0.3376	0.3167	0.3248	0.3023	0.3103	0.3183	0.3006	0.2974	0.299	0.2749	0.2444	0.1495	0.1865	0.1543	0.1881	0.2331	0.3312	0.336	0.5852
Fungi_Release38	dactylellina_haptotyla_cbs_200_50	C	0.2283	0.2347	0.209	0.1945	0.1929	0.2074	0.2122	0.2203	0.1752	0.2154	0.1865	0.1865	0.1624	0.1913	0.1576	0.1415	0.1817	0.1817	0.1752	0.1704	0.1849	0.1849	0.1511	0.1801	0.1881	0.1865	0.1881	0.1913	0.1527	0.2058	0.1929	0.1849	0.1768	0.1752	0.2122	0.1817	0.1672	0.1608	0.1913	0.1785	0.0932	0.0691	0.0772	0.0852	0.0579	0.074	0.0804
Fungi_Release38	dactylellina_haptotyla_cbs_200_50	G	0.2042	0.1608	0.1624	0.1704	0.1881	0.1785	0.1704	0.1801	0.2315	0.1977	0.1945	0.2267	0.201	0.2219	0.2363	0.2556	0.2122	0.2444	0.2508	0.2379	0.2556	0.2106	0.2186	0.2267	0.2058	0.2299	0.1913	0.1961	0.1977	0.1849	0.1881	0.1817	0.1768	0.1543	0.1752	0.1785	0.2074	0.2347	0.2781	0.41	0.5531	0.6093	0.6334	0.5145	0.4807	0.2926	0.2588
Fungi_Release38	dactylellina_haptotyla_cbs_200_50	T	0.3167	0.336	0.3505	0.328	0.3392	0.3376	0.3248	0.3119	0.3119	0.3183	0.299	0.3023	0.336	0.3119	0.3232	0.3151	0.3023	0.2669	0.2926	0.2749	0.2846	0.3006	0.3119	0.3055	0.3119	0.2814	0.2862	0.2926	0.3119	0.2926	0.2942	0.3312	0.336	0.3521	0.3119	0.3424	0.3264	0.3296	0.2862	0.2621	0.1672	0.1672	0.1013	0.1672	0.1302	0.2974	0.0756
Fungi_Release38	penicillium_rubens_wisconsin_54_1255	A	0.2621	0.2797	0.2492	0.2621	0.2797	0.2379	0.299	0.2781	0.2653	0.2701	0.2476	0.2717	0.2878	0.2444	0.2781	0.2524	0.3167	0.2797	0.2621	0.2926	0.2749	0.3039	0.3264	0.2878	0.2685	0.3103	0.2717	0.3151	0.2781	0.3006	0.2669	0.2621	0.2797	0.217	0.2878	0.2331	0.2363	0.2781	0.2556	0.1656	0.2299	0.2154	0.2251	0.2235	0.2685	0.2428	0.4244
Fungi_Release38	penicillium_rubens_wisconsin_54_1255	C	0.2122	0.2186	0.1977	0.2428	0.2267	0.2267	0.2138	0.2283	0.1961	0.246	0.2428	0.2588	0.2299	0.2492	0.209	0.2154	0.1945	0.2058	0.2283	0.1849	0.2315	0.2219	0.2074	0.1961	0.209	0.2138	0.2026	0.1961	0.2299	0.2074	0.1945	0.1897	0.172	0.246	0.2235	0.1801	0.2186	0.1559	0.2074	0.1961	0.09	0.0916	0.1093	0.0932	0.0868	0.1109	0.1045
Fungi_Release38	penicillium_rubens_wisconsin_54_1255	G	0.246	0.2299	0.2733	0.2186	0.2026	0.2154	0.2315	0.2347	0.2428	0.2444	0.209	0.1977	0.2138	0.1961	0.2219	0.2476	0.2138	0.2605	0.2476	0.2492	0.2444	0.2315	0.2106	0.2331	0.246	0.217	0.2621	0.2251	0.2219	0.2251	0.2347	0.2556	0.2605	0.2476	0.2203	0.2492	0.2653	0.2926	0.2717	0.3826	0.5032	0.5611	0.5322	0.5354	0.4904	0.3923	0.3698
Fungi_Release38	penicillium_rubens_wisconsin_54_1255	T	0.2797	0.2717	0.2797	0.2765	0.291	0.3199	0.2556	0.2588	0.2958	0.2395	0.3006	0.2717	0.2685	0.3103	0.291	0.2846	0.2749	0.254	0.2621	0.2733	0.2492	0.2428	0.2556	0.283	0.2765	0.2588	0.2637	0.2637	0.2701	0.2669	0.3039	0.2926	0.2878	0.2894	0.2685	0.3376	0.2797	0.2733	0.2653	0.2556	0.1768	0.1318	0.1334	0.1479	0.1543	0.254	0.1013
Fungi_Release38	aspergillus_brasiliensis_cbs_101740	A	0.2439	0.2246	0.2407	0.2132	0.2439	0.2003	0.2278	0.231	0.2407	0.2229	0.2278	0.2746	0.2326	0.2246	0.2326	0.2504	0.252	0.2197	0.2876	0.2553	0.2666	0.2569	0.2359	0.2956	0.2811	0.252	0.3005	0.3086	0.2795	0.2633	0.2666	0.2827	0.2714	0.2698	0.2779	0.2359	0.315	0.2811	0.2359	0.231	0.2746	0.2084	0.189	0.1987	0.2536	0.2666	0.4556
Fungi_Release38	aspergillus_brasiliensis_cbs_101740	C	0.2246	0.2569	0.2246	0.2472	0.2359	0.2391	0.2633	0.2472	0.2617	0.2601	0.231	0.2375	0.2407	0.2326	0.2601	0.2375	0.2003	0.231	0.2036	0.2003	0.1874	0.2246	0.21	0.1987	0.2246	0.2084	0.1922	0.1809	0.1906	0.1971	0.2116	0.2132	0.1987	0.2165	0.2375	0.1987	0.1664	0.2068	0.1939	0.1793	0.1115	0.0921	0.0921	0.0905	0.0646	0.1244	0.063
Fungi_Release38	aspergillus_brasiliensis_cbs_101740	G	0.2407	0.2456	0.2456	0.2165	0.1955	0.2391	0.1809	0.2068	0.2197	0.2019	0.2423	0.2294	0.2246	0.2326	0.2229	0.2326	0.273	0.2472	0.2294	0.2649	0.2504	0.2536	0.3021	0.2746	0.2342	0.2682	0.2359	0.2262	0.2456	0.2601	0.252	0.2262	0.2246	0.2391	0.2116	0.2472	0.2472	0.2859	0.2973	0.3215	0.4717	0.5509	0.5929	0.5525	0.567	0.37	0.3667
Fungi_Release38	aspergillus_brasiliensis_cbs_101740	T	0.2908	0.273	0.2892	0.3231	0.3247	0.3215	0.3279	0.315	0.2779	0.315	0.2989	0.2585	0.3021	0.3102	0.2843	0.2795	0.2746	0.3021	0.2795	0.2795	0.2956	0.2649	0.252	0.231	0.2601	0.2714	0.2714	0.2843	0.2843	0.2795	0.2698	0.2779	0.3053	0.2746	0.273	0.3183	0.2714	0.2262	0.273	0.2682	0.1422	0.1486	0.126	0.1583	0.1147	0.2391	0.1147
Fungi_Release38	pyronema_omphalodes_cbs_100304	A	0.2229	0.2116	0.21	0.2553	0.2375	0.2197	0.2116	0.2052	0.2229	0.2342	0.2294	0.2391	0.2633	0.252	0.2342	0.2682	0.2617	0.2617	0.2682	0.3183	0.273	0.2827	0.2585	0.3037	0.2973	0.2908	0.294	0.3021	0.3102	0.2649	0.2892	0.2973	0.273	0.2585	0.252	0.2795	0.2989	0.3069	0.3086	0.2391	0.2262	0.2068	0.1777	0.2181	0.2746	0.37	0.6171
Fungi_Release38	pyronema_omphalodes_cbs_100304	C	0.1906	0.1858	0.1826	0.2342	0.2165	0.2165	0.2246	0.21	0.2084	0.21	0.2084	0.1793	0.2084	0.1729	0.1858	0.2036	0.1777	0.1842	0.1648	0.147	0.1325	0.1422	0.1163	0.1325	0.1228	0.1228	0.1244	0.1389	0.1712	0.1551	0.1341	0.1696	0.1664	0.1793	0.1858	0.21	0.1616	0.1502	0.1438	0.1373	0.1341	0.0662	0.0646	0.0485	0.0646	0.0662	0.0323
Fungi_Release38	pyronema_omphalodes_cbs_100304	G	0.2908	0.2956	0.2811	0.2472	0.2714	0.2714	0.2714	0.2811	0.2779	0.2795	0.2601	0.2924	0.2585	0.2795	0.2892	0.2262	0.2859	0.3021	0.3069	0.2698	0.3247	0.3409	0.3683	0.3312	0.3279	0.3522	0.3376	0.3279	0.2827	0.2746	0.3005	0.252	0.2714	0.2892	0.2488	0.2019	0.231	0.252	0.3053	0.37	0.4701	0.5751	0.6171	0.6123	0.5267	0.37	0.2666
Fungi_Release38	pyronema_omphalodes_cbs_100304	T	0.2956	0.3069	0.3263	0.2633	0.2746	0.2924	0.2924	0.3037	0.2908	0.2763	0.3021	0.2892	0.2698	0.2956	0.2908	0.3021	0.2746	0.252	0.2601	0.2649	0.2698	0.2342	0.2569	0.2326	0.252	0.2342	0.2439	0.231	0.2359	0.3053	0.2763	0.2811	0.2892	0.273	0.3134	0.3086	0.3086	0.2908	0.2423	0.2536	0.1696	0.1519	0.1405	0.1212	0.1341	0.1939	0.084
Fungi_Release38	neofusicoccum_parvum_ucrnp2	A	0.1948	0.1997	0.1702	0.1948	0.1997	0.1768	0.1751	0.1653	0.1833	0.2046	0.1997	0.1882	0.1948	0.2144	0.1866	0.2177	0.2111	0.1948	0.2095	0.1817	0.2079	0.1964	0.2242	0.1866	0.234	0.2242	0.2046	0.2193	0.2144	0.2193	0.2439	0.1997	0.2079	0.2144	0.2046	0.1997	0.2357	0.2799	0.2439	0.1637	0.1768	0.1833	0.1817	0.1915	0.2144	0.2455	0.3584
Fungi_Release38	neofusicoccum_parvum_ucrnp2	C	0.2095	0.2586	0.2553	0.239	0.2537	0.2651	0.257	0.293	0.2717	0.2668	0.2766	0.2766	0.2619	0.2619	0.27	0.2619	0.2242	0.2586	0.2537	0.2602	0.2619	0.2226	0.2357	0.2651	0.1882	0.2471	0.2308	0.2537	0.2439	0.257	0.2144	0.2504	0.2193	0.2406	0.275	0.2717	0.2226	0.2177	0.2455	0.2357	0.1538	0.1129	0.1097	0.1146	0.0949	0.1506	0.1113
Fungi_Release38	neofusicoccum_parvum_ucrnp2	G	0.3355	0.3306	0.3208	0.3257	0.3175	0.3355	0.3077	0.3241	0.2897	0.293	0.275	0.2995	0.2979	0.2881	0.3322	0.2782	0.3224	0.3437	0.3339	0.2979	0.3011	0.3552	0.3093	0.3339	0.383	0.329	0.3715	0.3404	0.3159	0.3208	0.3453	0.3077	0.3339	0.293	0.2962	0.275	0.2733	0.2946	0.2946	0.4108	0.563	0.6056	0.6105	0.5712	0.5957	0.4321	0.4534
Fungi_Release38	neofusicoccum_parvum_ucrnp2	T	0.2602	0.2111	0.2537	0.2406	0.2291	0.2226	0.2602	0.2177	0.2553	0.2357	0.2488	0.2357	0.2455	0.2357	0.2111	0.2422	0.2422	0.2029	0.2029	0.2602	0.2291	0.2259	0.2308	0.2144	0.1948	0.1997	0.1931	0.1866	0.2259	0.2029	0.1964	0.2422	0.239	0.252	0.2242	0.2537	0.2684	0.2079	0.216	0.1899	0.1064	0.0982	0.0982	0.1227	0.0949	0.1718	0.0769
Fungi_Release38	aspergillus_nomius_nrrl_13137	A	0.2385	0.227	0.2484	0.2105	0.2467	0.227	0.2401	0.2368	0.2418	0.2467	0.2632	0.2138	0.2632	0.2401	0.2599	0.2516	0.222	0.2237	0.2434	0.2533	0.2648	0.2714	0.2434	0.2648	0.2878	0.2615	0.2911	0.2582	0.2862	0.2648	0.2796	0.2599	0.3224	0.2714	0.2664	0.2648	0.273	0.3059	0.2681	0.2401	0.25	0.1891	0.1859	0.2089	0.2434	0.278	0.472
Fungi_Release38	aspergillus_nomius_nrrl_13137	C	0.199	0.2237	0.2122	0.2368	0.2155	0.2484	0.2418	0.2484	0.2566	0.2582	0.2368	0.2681	0.2056	0.2681	0.2303	0.2253	0.2418	0.2467	0.2237	0.2204	0.2072	0.2204	0.2072	0.2105	0.2072	0.2105	0.1842	0.2237	0.1924	0.222	0.2434	0.2155	0.1875	0.2237	0.227	0.2484	0.2155	0.2171	0.2056	0.1957	0.1283	0.1316	0.0855	0.0724	0.0757	0.1086	0.1184
Fungi_Release38	aspergillus_nomius_nrrl_13137	G	0.2599	0.2056	0.2319	0.2253	0.2385	0.2171	0.2105	0.2286	0.2204	0.2385	0.2385	0.2204	0.2385	0.1842	0.2434	0.222	0.2516	0.2204	0.25	0.2401	0.2566	0.2697	0.2484	0.2385	0.2385	0.2171	0.2516	0.2714	0.2697	0.2319	0.1974	0.2615	0.2072	0.2056	0.2023	0.2007	0.227	0.273	0.2451	0.3092	0.4786	0.5592	0.5757	0.5872	0.5345	0.4079	0.3257
Fungi_Release38	aspergillus_nomius_nrrl_13137	T	0.3026	0.3438	0.3076	0.3273	0.2993	0.3076	0.3076	0.2862	0.2812	0.2566	0.2615	0.2977	0.2928	0.3076	0.2664	0.301	0.2845	0.3092	0.2829	0.2862	0.2714	0.2385	0.301	0.2862	0.2664	0.3109	0.273	0.2467	0.2516	0.2812	0.2796	0.2632	0.2829	0.2993	0.3043	0.2862	0.2845	0.2039	0.2812	0.2549	0.1431	0.1201	0.153	0.1316	0.1464	0.2056	0.0839
Fungi_Release38	kwoniella_pini_cbs_10737	A	0.2755	0.2354	0.3088	0.2671	0.2821	0.2805	0.2805	0.2471	0.2888	0.2654	0.2721	0.2788	0.2855	0.2538	0.3189	0.2705	0.3072	0.2938	0.3506	0.2988	0.2938	0.3306	0.2988	0.2922	0.2972	0.2821	0.3072	0.2705	0.2972	0.2671	0.2821	0.2521	0.2688	0.2821	0.2571	0.2654	0.2671	0.2638	0.2471	0.1669	0.2187	0.2304	0.2053	0.2621	0.3055	0.3272	0.5409
Fungi_Release38	kwoniella_pini_cbs_10737	C	0.2053	0.2187	0.1636	0.1886	0.212	0.2387	0.222	0.2053	0.212	0.212	0.2154	0.202	0.1853	0.1903	0.1803	0.2003	0.192	0.1903	0.1736	0.1786	0.1803	0.1503	0.1536	0.1987	0.1786	0.1553	0.177	0.2003	0.1619	0.187	0.1903	0.1703	0.182	0.1937	0.1953	0.1369	0.1319	0.1402	0.1386	0.1352	0.0801	0.0701	0.0501	0.0785	0.0668	0.0851	0.0518
Fungi_Release38	kwoniella_pini_cbs_10737	G	0.1786	0.207	0.1886	0.1686	0.177	0.1653	0.182	0.2003	0.1736	0.1903	0.1853	0.2104	0.2137	0.202	0.1987	0.222	0.2321	0.222	0.207	0.2237	0.2371	0.227	0.2404	0.2154	0.2287	0.2404	0.217	0.2287	0.212	0.2154	0.202	0.2137	0.1987	0.1953	0.1736	0.2087	0.2604	0.2554	0.2821	0.3723	0.5359	0.571	0.5676	0.4608	0.4674	0.3272	0.2922
Fungi_Release38	kwoniella_pini_cbs_10737	T	0.3406	0.3389	0.3389	0.3756	0.3289	0.3155	0.3155	0.3472	0.3255	0.3322	0.3272	0.3088	0.3155	0.3539	0.3022	0.3072	0.2688	0.2938	0.2688	0.2988	0.2888	0.2922	0.3072	0.2938	0.2955	0.3222	0.2988	0.3005	0.3289	0.3306	0.3255	0.3639	0.3506	0.3289	0.374	0.389	0.3406	0.3406	0.3322	0.3255	0.1653	0.1285	0.177	0.1987	0.1603	0.2604	0.1152
Fungi_Release38	fistulina_hepatica_atcc_64428	A	0.1889	0.2057	0.2108	0.226	0.1872	0.2159	0.1939	0.2277	0.2277	0.2074	0.2277	0.2175	0.2344	0.1838	0.2209	0.2209	0.1973	0.2142	0.2175	0.1922	0.2074	0.2631	0.2361	0.2597	0.1821	0.2175	0.2226	0.2378	0.2513	0.2243	0.2277	0.2395	0.2378	0.2496	0.2664	0.2462	0.2816	0.2496	0.2395	0.2074	0.2074	0.1703	0.2226	0.2057	0.2631	0.2293	0.3524
Fungi_Release38	fistulina_hepatica_atcc_64428	C	0.1889	0.2125	0.2395	0.1872	0.2462	0.2175	0.2546	0.2513	0.2243	0.2614	0.2479	0.2496	0.2142	0.2226	0.2411	0.2766	0.2563	0.2361	0.2327	0.2293	0.2513	0.1956	0.2192	0.231	0.2411	0.1956	0.2411	0.2428	0.2614	0.2057	0.2327	0.2243	0.2411	0.2513	0.2175	0.2378	0.204	0.2142	0.204	0.2125	0.1282	0.1113	0.1012	0.1501	0.1029	0.145	0.1096
Fungi_Release38	fistulina_hepatica_atcc_64428	G	0.2985	0.2664	0.2395	0.231	0.2546	0.2192	0.204	0.1804	0.226	0.1939	0.1754	0.2243	0.1973	0.2361	0.2209	0.1737	0.2226	0.199	0.1939	0.2782	0.253	0.2024	0.231	0.2142	0.2344	0.2496	0.2361	0.2209	0.2226	0.2563	0.2125	0.2344	0.199	0.1922	0.1821	0.2277	0.2664	0.2867	0.2901	0.3474	0.516	0.6003	0.57	0.4739	0.4975	0.4486	0.4351
Fungi_Release38	fistulina_hepatica_atcc_64428	T	0.3238	0.3153	0.3103	0.3558	0.312	0.3474	0.3474	0.3406	0.3221	0.3373	0.3491	0.3086	0.3541	0.3575	0.317	0.3288	0.3238	0.3508	0.3558	0.3002	0.2884	0.339	0.3137	0.2951	0.3423	0.3373	0.3002	0.2985	0.2648	0.3137	0.3272	0.3019	0.3221	0.3069	0.3339	0.2884	0.2479	0.2496	0.2664	0.2327	0.1484	0.118	0.1062	0.1703	0.1366	0.1771	0.1029
Fungi_Release38	thermothelomyces_thermophila_atcc_42464	A	0.2416	0.2179	0.2196	0.2061	0.2179	0.2078	0.2534	0.1993	0.1943	0.2061	0.1959	0.2078	0.223	0.2297	0.2061	0.2213	0.2331	0.201	0.2466	0.1993	0.2551	0.2652	0.2466	0.25	0.2399	0.2331	0.2128	0.2821	0.2179	0.2264	0.2466	0.223	0.2432	0.2348	0.223	0.2128	0.2584	0.2551	0.223	0.1858	0.1841	0.1774	0.2078	0.1959	0.2247	0.3277	0.3834
Fungi_Release38	thermothelomyces_thermophila_atcc_42464	C	0.2568	0.2956	0.2652	0.2956	0.3007	0.3007	0.272	0.299	0.2686	0.2838	0.2855	0.2956	0.2584	0.2601	0.2855	0.2618	0.2432	0.3024	0.2483	0.2736	0.2044	0.2264	0.2618	0.2196	0.2517	0.2551	0.2635	0.2432	0.2247	0.2568	0.2416	0.2534	0.2365	0.2939	0.2787	0.2753	0.2162	0.2584	0.2652	0.2382	0.1639	0.1554	0.1284	0.1233	0.1301	0.1486	0.1267
Fungi_Release38	thermothelomyces_thermophila_atcc_42464	G	0.2703	0.2686	0.2787	0.2483	0.2635	0.2838	0.2686	0.2517	0.299	0.272	0.2889	0.2804	0.2872	0.2838	0.2922	0.2551	0.2872	0.2838	0.277	0.2922	0.3125	0.299	0.2855	0.3193	0.3159	0.2939	0.3294	0.2686	0.3125	0.3159	0.2855	0.2973	0.2753	0.2618	0.2686	0.272	0.3024	0.3277	0.3463	0.4088	0.5709	0.576	0.576	0.5473	0.5422	0.402	0.4139
Fungi_Release38	thermothelomyces_thermophila_atcc_42464	T	0.2314	0.2179	0.2365	0.25	0.2179	0.2078	0.2061	0.25	0.2382	0.2382	0.2297	0.2162	0.2314	0.2264	0.2162	0.2618	0.2365	0.2128	0.228	0.2348	0.228	0.2095	0.2061	0.2111	0.1926	0.2179	0.1943	0.2061	0.2449	0.201	0.2264	0.2264	0.2449	0.2095	0.2297	0.2399	0.223	0.1588	0.1655	0.1672	0.0811	0.0912	0.0878	0.1334	0.103	0.1216	0.076
Fungi_Release38	oidiodendron_maius_zn	A	0.3009	0.2274	0.2325	0.2581	0.2547	0.2769	0.2667	0.2513	0.2154	0.2359	0.2256	0.2393	0.253	0.2308	0.2427	0.2632	0.2393	0.2632	0.2872	0.253	0.2786	0.2718	0.2803	0.2513	0.2821	0.3043	0.2479	0.306	0.2855	0.2821	0.2803	0.2615	0.294	0.2735	0.294	0.2735	0.2974	0.2889	0.3128	0.2564	0.2393	0.2154	0.1795	0.2342	0.2462	0.2735	0.4
Fungi_Release38	oidiodendron_maius_zn	C	0.1778	0.2051	0.1983	0.2154	0.2051	0.2376	0.2376	0.2205	0.241	0.2667	0.2615	0.2821	0.2308	0.2684	0.2547	0.2239	0.2376	0.2342	0.212	0.212	0.2188	0.2205	0.2171	0.2085	0.2274	0.2085	0.2274	0.1932	0.2171	0.2222	0.2205	0.2444	0.2154	0.212	0.2188	0.2393	0.188	0.2188	0.1675	0.1795	0.1538	0.1009	0.0991	0.0889	0.0872	0.1026	0.1231
Fungi_Release38	oidiodendron_maius_zn	G	0.2376	0.2821	0.2803	0.2205	0.2239	0.2017	0.2171	0.2171	0.2325	0.1983	0.1949	0.2137	0.2137	0.2171	0.2171	0.1846	0.1863	0.2137	0.2171	0.2291	0.2137	0.2205	0.1897	0.2444	0.2068	0.2205	0.2598	0.2137	0.2222	0.2427	0.2205	0.2359	0.2103	0.2239	0.1966	0.1966	0.188	0.2205	0.2427	0.3111	0.4342	0.5385	0.5897	0.5419	0.5402	0.4342	0.3966
Fungi_Release38	oidiodendron_maius_zn	T	0.2838	0.2855	0.2889	0.306	0.3162	0.2838	0.2786	0.3111	0.3111	0.2991	0.3179	0.265	0.3026	0.2838	0.2855	0.3282	0.3368	0.2889	0.2838	0.306	0.2889	0.2872	0.3128	0.2957	0.2838	0.2667	0.265	0.2872	0.2752	0.253	0.2786	0.2581	0.2803	0.2906	0.2906	0.2906	0.3265	0.2718	0.2769	0.253	0.1726	0.1453	0.1316	0.135	0.1265	0.1897	0.0803
Fungi_Release38	umbilicaria_pustulata	A	0.2329	0.2158	0.2123	0.238	0.2038	0.2021	0.2295	0.2483	0.2209	0.2055	0.2226	0.2243	0.1781	0.2277	0.2295	0.2089	0.2432	0.214	0.2329	0.2312	0.226	0.2226	0.2226	0.2517	0.2158	0.2192	0.2397	0.2346	0.2432	0.274	0.2192	0.2123	0.262	0.2072	0.2072	0.2021	0.2158	0.2568	0.2928	0.1695	0.1935	0.1781	0.1644	0.1575	0.1969	0.2414	0.3955
Fungi_Release38	umbilicaria_pustulata	C	0.1644	0.2158	0.2003	0.1866	0.214	0.2226	0.226	0.2089	0.2295	0.2346	0.2551	0.226	0.2432	0.2072	0.2277	0.2483	0.2072	0.2123	0.2346	0.2089	0.2106	0.226	0.1849	0.2055	0.1969	0.2123	0.2106	0.2123	0.2312	0.2055	0.2329	0.2568	0.2123	0.2209	0.2346	0.2363	0.1747	0.1935	0.1712	0.2089	0.1199	0.089	0.0959	0.1199	0.0959	0.1301	0.0822
Fungi_Release38	umbilicaria_pustulata	G	0.3613	0.3082	0.3168	0.3168	0.3065	0.2877	0.286	0.2928	0.2911	0.2945	0.2945	0.3082	0.3202	0.2979	0.2979	0.286	0.3219	0.3219	0.3134	0.3322	0.3185	0.3151	0.351	0.3134	0.3134	0.2911	0.3168	0.2997	0.286	0.2654	0.2671	0.2825	0.2808	0.286	0.2637	0.2397	0.2808	0.3219	0.3185	0.3733	0.5445	0.6216	0.6182	0.5942	0.5925	0.4247	0.4572
Fungi_Release38	umbilicaria_pustulata	T	0.2414	0.2603	0.2705	0.2586	0.2757	0.2877	0.2586	0.25	0.2586	0.2654	0.2277	0.2414	0.2586	0.2671	0.2449	0.2568	0.2277	0.2517	0.2192	0.2277	0.2449	0.2363	0.2414	0.2295	0.274	0.2774	0.2329	0.2534	0.2397	0.2551	0.2808	0.2483	0.2449	0.286	0.2945	0.3219	0.3288	0.2277	0.2175	0.2483	0.1421	0.1113	0.1216	0.1284	0.1147	0.2038	0.0651
Fungi_Release38	aspergillus_bombycis	A	0.2034	0.2086	0.2224	0.1914	0.219	0.2224	0.2207	0.2224	0.2345	0.2379	0.25	0.2138	0.2276	0.2466	0.2569	0.2552	0.2569	0.2276	0.2569	0.2879	0.269	0.2552	0.2397	0.3034	0.2862	0.2655	0.2534	0.2707	0.2517	0.2483	0.2793	0.2517	0.2672	0.2897	0.2603	0.2603	0.3138	0.3259	0.2569	0.2431	0.2655	0.1966	0.169	0.2052	0.2534	0.3052	0.4914
Fungi_Release38	aspergillus_bombycis	C	0.2379	0.2466	0.2466	0.2172	0.2534	0.2897	0.2397	0.2638	0.2672	0.2414	0.2759	0.2586	0.25	0.219	0.2483	0.2034	0.2	0.2569	0.2328	0.2017	0.2052	0.2172	0.2207	0.1862	0.2276	0.2138	0.2138	0.1948	0.2362	0.1879	0.2293	0.2172	0.2448	0.2224	0.2483	0.2138	0.1931	0.2155	0.2155	0.2155	0.1172	0.1069	0.0914	0.0776	0.0862	0.0931	0.0879
Fungi_Release38	aspergillus_bombycis	G	0.2431	0.2397	0.2328	0.2155	0.2241	0.1948	0.2293	0.2034	0.2086	0.2155	0.2086	0.2414	0.2379	0.2069	0.2362	0.2224	0.2517	0.2362	0.2052	0.2224	0.2431	0.281	0.2483	0.2638	0.2603	0.2586	0.2776	0.2707	0.2448	0.2534	0.2207	0.2328	0.2207	0.231	0.1966	0.2103	0.2483	0.2241	0.269	0.3	0.4741	0.5603	0.5879	0.5655	0.5414	0.4138	0.3224
Fungi_Release38	aspergillus_bombycis	T	0.3155	0.3052	0.2983	0.3759	0.3034	0.2931	0.3103	0.3103	0.2897	0.3052	0.2655	0.2862	0.2845	0.3276	0.2586	0.319	0.2914	0.2793	0.3052	0.2879	0.2828	0.2466	0.2914	0.2466	0.2259	0.2621	0.2552	0.2638	0.2672	0.3103	0.2707	0.2983	0.2672	0.2569	0.2948	0.3155	0.2448	0.2345	0.2586	0.2414	0.1431	0.1362	0.1517	0.1517	0.119	0.1879	0.0983
Fungi_Release38	aspergillus_niger_atcc_1015	A	0.2314	0.2349	0.2211	0.2349	0.2383	0.2297	0.2228	0.1779	0.2297	0.2453	0.2453	0.2245	0.2763	0.209	0.2763	0.2073	0.2591	0.2487	0.2642	0.2677	0.2919	0.285	0.2625	0.2867	0.2591	0.2504	0.2815	0.2712	0.2608	0.2504	0.3022	0.2867	0.2815	0.2504	0.2677	0.2332	0.3057	0.2867	0.2297	0.2124	0.2349	0.209	0.2021	0.2073	0.2573	0.2349	0.4283
Fungi_Release38	aspergillus_niger_atcc_1015	C	0.228	0.228	0.2366	0.2487	0.2608	0.2366	0.2245	0.2642	0.2556	0.2349	0.2176	0.247	0.2038	0.2142	0.2418	0.2228	0.2211	0.2107	0.2332	0.1969	0.2003	0.2038	0.1813	0.2142	0.2176	0.2263	0.2073	0.1727	0.2021	0.2003	0.2055	0.1934	0.228	0.2366	0.2332	0.2263	0.1917	0.1917	0.2211	0.1693	0.1261	0.1278	0.0898	0.076	0.0674	0.0915	0.0864
Fungi_Release38	aspergillus_niger_atcc_1015	G	0.2176	0.266	0.2435	0.2314	0.2176	0.2487	0.2263	0.228	0.2176	0.2349	0.2504	0.2159	0.228	0.2763	0.2193	0.2608	0.2504	0.2487	0.2608	0.2504	0.2383	0.2349	0.2988	0.2366	0.2573	0.2453	0.2625	0.2781	0.2608	0.2884	0.2124	0.2401	0.2228	0.2142	0.2124	0.2504	0.2573	0.2798	0.266	0.3644	0.4577	0.5112	0.5406	0.5682	0.5492	0.4508	0.4111
Fungi_Release38	aspergillus_niger_atcc_1015	T	0.323	0.2712	0.2988	0.285	0.2832	0.285	0.3264	0.3299	0.2971	0.285	0.2867	0.3126	0.2919	0.3005	0.2625	0.3092	0.2694	0.2919	0.2418	0.285	0.2694	0.2763	0.2573	0.2625	0.266	0.2781	0.2487	0.2781	0.2763	0.2608	0.2798	0.2798	0.2677	0.2988	0.2867	0.2902	0.2453	0.2418	0.2832	0.2539	0.1813	0.152	0.1675	0.1485	0.1261	0.2228	0.0743
Fungi_Release38	lichtheimia_ramosa	A	0.3536	0.3432	0.2877	0.3657	0.3085	0.364	0.3362	0.2912	0.3258	0.3172	0.3068	0.338	0.3518	0.3172	0.3033	0.3501	0.3397	0.2912	0.312	0.338	0.3588	0.2964	0.3414	0.3241	0.3657	0.3518	0.3172	0.3484	0.3137	0.331	0.3518	0.3189	0.3033	0.3622	0.305	0.3293	0.3657	0.3206	0.2842	0.2097	0.2097	0.2132	0.2478	0.3553	0.3726	0.3813	0.6707
Fungi_Release38	lichtheimia_ramosa	C	0.1023	0.1179	0.1352	0.1265	0.1282	0.1075	0.1213	0.1438	0.1282	0.1248	0.1404	0.1352	0.1213	0.1334	0.1646	0.1404	0.1231	0.1369	0.1508	0.1612	0.1386	0.1577	0.1196	0.1542	0.1352	0.1456	0.1473	0.1646	0.1421	0.1213	0.1733	0.1924	0.208	0.1802	0.1889	0.1958	0.1144	0.1127	0.0936	0.0797	0.0364	0.0364	0.0416	0.0433	0.0745	0.0676	0.0312
Fungi_Release38	lichtheimia_ramosa	G	0.234	0.2513	0.2686	0.227	0.2461	0.2184	0.2305	0.2669	0.2322	0.253	0.253	0.2201	0.2045	0.2097	0.2305	0.1958	0.208	0.2496	0.2444	0.2149	0.1906	0.2132	0.2253	0.2426	0.2097	0.1889	0.2322	0.1802	0.1941	0.1958	0.1646	0.1473	0.1542	0.1317	0.1508	0.1698	0.2201	0.26	0.3224	0.4125	0.5841	0.5945	0.5442	0.4142	0.3432	0.2704	0.1906
Fungi_Release38	lichtheimia_ramosa	T	0.3102	0.2877	0.3085	0.2808	0.3172	0.3102	0.312	0.2981	0.3137	0.305	0.2998	0.3068	0.3224	0.3397	0.3016	0.3137	0.3293	0.3224	0.2929	0.286	0.312	0.3328	0.3137	0.279	0.2894	0.3137	0.3033	0.3068	0.3501	0.3518	0.3102	0.3414	0.3345	0.3258	0.3553	0.305	0.2998	0.3068	0.2998	0.2981	0.1698	0.156	0.1664	0.1872	0.2097	0.2808	0.1075
Fungi_Release38	spizellomyces_punctatus_daom_br117	A	0.2587	0.2326	0.2708	0.2535	0.2448	0.2326	0.2361	0.2378	0.2448	0.2222	0.2535	0.276	0.2344	0.2361	0.2483	0.2222	0.2292	0.2639	0.2604	0.2917	0.2517	0.2656	0.276	0.25	0.283	0.2378	0.2552	0.2378	0.2882	0.2413	0.2778	0.2552	0.2812	0.2622	0.2656	0.2257	0.2361	0.2188	0.1927	0.1302	0.1267	0.1424	0.1597	0.2361	0.2639	0.2795	0.4531
Fungi_Release38	spizellomyces_punctatus_daom_br117	C	0.2257	0.2222	0.2014	0.2014	0.1979	0.2066	0.2083	0.2135	0.1997	0.2292	0.1927	0.191	0.2205	0.2188	0.2101	0.2014	0.1823	0.2344	0.2014	0.2083	0.2101	0.2101	0.1684	0.2222	0.1927	0.2396	0.2049	0.2448	0.1962	0.2014	0.224	0.2344	0.1806	0.2205	0.1979	0.1858	0.1806	0.1806	0.1997	0.1806	0.1007	0.0538	0.0729	0.0955	0.1233	0.1163	0.0781
Fungi_Release38	spizellomyces_punctatus_daom_br117	G	0.2361	0.2083	0.2083	0.1962	0.2517	0.2205	0.2309	0.224	0.1979	0.2118	0.2205	0.2153	0.2049	0.2465	0.2031	0.2309	0.224	0.2083	0.2292	0.1944	0.2274	0.2118	0.2188	0.2083	0.2118	0.1927	0.2014	0.1979	0.1753	0.1892	0.1319	0.1684	0.1632	0.1632	0.1285	0.1753	0.2188	0.2257	0.2205	0.3108	0.5365	0.6441	0.6267	0.4705	0.4757	0.3906	0.3837
Fungi_Release38	spizellomyces_punctatus_daom_br117	T	0.2795	0.3368	0.3194	0.349	0.3056	0.3403	0.3247	0.3247	0.3576	0.3368	0.3333	0.3177	0.3403	0.2986	0.3385	0.3455	0.3646	0.2934	0.309	0.3056	0.3108	0.3125	0.3368	0.3194	0.3125	0.3299	0.3385	0.3194	0.3403	0.3681	0.3663	0.342	0.375	0.3542	0.408	0.4132	0.3646	0.375	0.3872	0.3785	0.2361	0.1597	0.1406	0.1979	0.1372	0.2135	0.0851
Fungi_Release38	aspergillus_calidoustus	A	0.233	0.2226	0.2157	0.2261	0.1878	0.2104	0.2087	0.24	0.2122	0.1878	0.2157	0.2191	0.2348	0.2278	0.2174	0.2104	0.2504	0.2487	0.2365	0.233	0.2452	0.2435	0.2643	0.2713	0.2696	0.2626	0.2696	0.2783	0.2765	0.3217	0.2661	0.2591	0.2957	0.2783	0.2939	0.28	0.2539	0.2539	0.2643	0.273	0.2957	0.1739	0.1478	0.1774	0.1861	0.2591	0.4661
Fungi_Release38	aspergillus_calidoustus	C	0.2365	0.2643	0.2557	0.2678	0.2417	0.2626	0.2922	0.2661	0.2939	0.3043	0.2713	0.2609	0.2817	0.2643	0.287	0.2626	0.2452	0.2365	0.2296	0.2313	0.2191	0.2104	0.2035	0.1896	0.1913	0.2157	0.2487	0.2	0.2226	0.2017	0.2348	0.2191	0.2226	0.2104	0.2191	0.2348	0.2174	0.247	0.1965	0.2017	0.1148	0.1948	0.113	0.0852	0.0835	0.087	0.0765
Fungi_Release38	aspergillus_calidoustus	G	0.2417	0.2313	0.2209	0.2278	0.2226	0.2226	0.2	0.2365	0.193	0.233	0.2035	0.1896	0.1965	0.2139	0.2243	0.2313	0.2226	0.2139	0.2313	0.2887	0.2435	0.2696	0.2678	0.2991	0.2678	0.2609	0.2504	0.2226	0.2713	0.2417	0.2052	0.2487	0.2122	0.2209	0.2052	0.2313	0.2383	0.2557	0.2191	0.28	0.4383	0.513	0.6	0.5757	0.6191	0.4765	0.3948
Fungi_Release38	aspergillus_calidoustus	T	0.2887	0.2817	0.3078	0.2783	0.3478	0.3043	0.2991	0.2574	0.3009	0.2748	0.3096	0.3304	0.287	0.2939	0.2713	0.2957	0.2817	0.3009	0.3026	0.247	0.2922	0.2765	0.2643	0.24	0.2713	0.2609	0.2313	0.2991	0.2296	0.2348	0.2939	0.273	0.2696	0.2904	0.2817	0.2539	0.2904	0.2435	0.32	0.2452	0.1513	0.1183	0.1391	0.1617	0.1113	0.1774	0.0626
Fungi_Release38	talaromyces_stipitatus_atcc_10500	A	0.2143	0.2213	0.2422	0.2422	0.2143	0.277	0.2387	0.2439	0.2456	0.2491	0.2265	0.2561	0.2108	0.2718	0.2544	0.2735	0.2787	0.2456	0.2787	0.2857	0.2892	0.2822	0.2787	0.2927	0.2979	0.2875	0.2892	0.284	0.2997	0.2544	0.284	0.3084	0.3118	0.2526	0.3188	0.2892	0.284	0.2979	0.2631	0.2578	0.2822	0.23	0.1916	0.1951	0.2387	0.2909	0.5453
Fungi_Release38	talaromyces_stipitatus_atcc_10500	C	0.2073	0.2596	0.2334	0.2317	0.2578	0.2561	0.2439	0.2544	0.2544	0.2422	0.284	0.2474	0.2474	0.216	0.2456	0.2108	0.2108	0.1882	0.1916	0.2056	0.176	0.1707	0.2021	0.1812	0.1899	0.1603	0.1498	0.1655	0.1725	0.2213	0.1986	0.2021	0.1951	0.2091	0.176	0.2265	0.1672	0.1672	0.162	0.1672	0.1202	0.1272	0.0767	0.0767	0.0505	0.0871	0.0767
Fungi_Release38	talaromyces_stipitatus_atcc_10500	G	0.2369	0.1777	0.2195	0.1916	0.1812	0.162	0.1847	0.169	0.1498	0.1794	0.1847	0.1899	0.1934	0.2143	0.2073	0.216	0.2073	0.2439	0.2021	0.2282	0.2439	0.2439	0.2439	0.2491	0.2265	0.2439	0.2613	0.2596	0.2404	0.2091	0.1742	0.2021	0.1864	0.2195	0.1707	0.1951	0.2334	0.2439	0.2735	0.3275	0.4425	0.4808	0.5906	0.5976	0.5767	0.3624	0.2944
Fungi_Release38	talaromyces_stipitatus_atcc_10500	T	0.3415	0.3415	0.3049	0.3345	0.3467	0.3049	0.3328	0.3328	0.3502	0.3293	0.3049	0.3066	0.3484	0.2979	0.2927	0.2997	0.3031	0.3223	0.3275	0.2805	0.2909	0.3031	0.2753	0.277	0.2857	0.3084	0.2997	0.2909	0.2875	0.3153	0.3432	0.2875	0.3066	0.3188	0.3345	0.2892	0.3153	0.2909	0.3014	0.2474	0.1551	0.162	0.1411	0.1307	0.1341	0.2596	0.0836
Fungi_Release38	aspergillus_terreus	A	0.1982	0.193	0.2088	0.2175	0.1807	0.1825	0.2053	0.186	0.207	0.1596	0.2281	0.2018	0.193	0.214	0.2246	0.2105	0.2123	0.2246	0.2193	0.2333	0.2386	0.2649	0.2211	0.2807	0.2491	0.2614	0.2596	0.2474	0.2544	0.2579	0.2561	0.2544	0.2439	0.2333	0.2316	0.2281	0.2877	0.2596	0.286	0.2491	0.2895	0.2228	0.1474	0.1491	0.1544	0.1895	0.4263
Fungi_Release38	aspergillus_terreus	C	0.1842	0.2386	0.2526	0.2561	0.2789	0.2649	0.2386	0.2351	0.2947	0.2807	0.2614	0.2965	0.2947	0.2439	0.2316	0.2544	0.2281	0.2439	0.2246	0.2456	0.214	0.214	0.2158	0.1947	0.214	0.2298	0.1965	0.2123	0.2281	0.2105	0.2561	0.2263	0.2368	0.2439	0.2421	0.2614	0.214	0.2754	0.2351	0.2211	0.1737	0.1702	0.1368	0.0737	0.0614	0.1	0.1018
Fungi_Release38	aspergillus_terreus	G	0.314	0.2649	0.2596	0.2702	0.2439	0.2579	0.2772	0.2895	0.2105	0.2368	0.2421	0.2263	0.2228	0.2544	0.2368	0.2404	0.2596	0.2509	0.2895	0.2404	0.2667	0.2544	0.2614	0.2825	0.286	0.2544	0.2702	0.2684	0.2895	0.2684	0.2526	0.2263	0.2105	0.2579	0.2281	0.2211	0.2281	0.2158	0.2158	0.3175	0.4123	0.4667	0.5789	0.6351	0.7	0.5105	0.414
Fungi_Release38	aspergillus_terreus	T	0.3035	0.3035	0.2789	0.2561	0.2965	0.2947	0.2789	0.2895	0.2877	0.3228	0.2684	0.2754	0.2895	0.2877	0.307	0.2947	0.3	0.2807	0.2667	0.2807	0.2807	0.2667	0.3018	0.2421	0.2509	0.2544	0.2737	0.2719	0.2281	0.2632	0.2351	0.293	0.3088	0.2649	0.2982	0.2895	0.2702	0.2491	0.2632	0.2123	0.1246	0.1404	0.1368	0.1421	0.0842	0.2	0.0579
Fungi_Release38	colletotrichum_gloeosporioides	A	0.1989	0.2007	0.2095	0.1866	0.2588	0.1831	0.213	0.1919	0.2077	0.2324	0.206	0.1972	0.2394	0.2553	0.206	0.2201	0.2271	0.2324	0.2412	0.2201	0.2465	0.2271	0.2042	0.2641	0.2518	0.2377	0.2729	0.2465	0.2342	0.2606	0.2394	0.2359	0.2324	0.2606	0.257	0.2271	0.2623	0.3116	0.3099	0.2342	0.2694	0.1673	0.1831	0.1514	0.2148	0.2359	0.3873
Fungi_Release38	colletotrichum_gloeosporioides	C	0.2342	0.2623	0.2201	0.2817	0.2641	0.2852	0.2905	0.2535	0.3011	0.2799	0.294	0.2923	0.2623	0.2623	0.2482	0.2658	0.2623	0.2254	0.2394	0.2641	0.2148	0.2359	0.2447	0.2236	0.2359	0.25	0.2148	0.2165	0.2359	0.2183	0.2482	0.2359	0.2412	0.2359	0.2641	0.2588	0.2394	0.2394	0.2324	0.2658	0.1444	0.1215	0.1004	0.1092	0.0863	0.169	0.1092
Fungi_Release38	colletotrichum_gloeosporioides	G	0.2975	0.2711	0.2658	0.2799	0.2165	0.2394	0.2254	0.257	0.2518	0.2165	0.257	0.2711	0.2412	0.2377	0.2641	0.25	0.25	0.2694	0.2623	0.257	0.294	0.2993	0.2975	0.3011	0.2711	0.2887	0.2746	0.2746	0.2905	0.2993	0.2799	0.2623	0.2887	0.2518	0.2306	0.2271	0.2324	0.2183	0.2535	0.3028	0.4525	0.5792	0.618	0.6021	0.5863	0.4437	0.4261
Fungi_Release38	colletotrichum_gloeosporioides	T	0.2694	0.2658	0.3046	0.2518	0.2606	0.2923	0.2711	0.2975	0.2394	0.2711	0.243	0.2394	0.257	0.2447	0.2817	0.2641	0.2606	0.2729	0.257	0.2588	0.2447	0.2377	0.2535	0.2113	0.2412	0.2236	0.2377	0.2623	0.2394	0.2218	0.2324	0.2658	0.2377	0.2518	0.2482	0.287	0.2658	0.2306	0.2042	0.1972	0.1338	0.132	0.0986	0.1373	0.1127	0.1514	0.0775
Fungi_Release38	diplodia_seriata	A	0.224	0.2205	0.2116	0.2116	0.2434	0.1623	0.2099	0.2187	0.1781	0.2099	0.2063	0.1746	0.1869	0.2063	0.1799	0.2116	0.2222	0.2081	0.2205	0.2063	0.2222	0.2134	0.2046	0.2346	0.2187	0.2275	0.2099	0.2152	0.2116	0.2293	0.2293	0.1675	0.2205	0.2046	0.2081	0.2063	0.2205	0.2328	0.2399	0.1817	0.1993	0.1411	0.1534	0.2205	0.2522	0.284	0.3721
Fungi_Release38	diplodia_seriata	C	0.2346	0.2346	0.261	0.2628	0.261	0.2663	0.2963	0.2751	0.254	0.2963	0.2822	0.2945	0.2875	0.2681	0.2628	0.2504	0.2575	0.261	0.2381	0.2504	0.2575	0.2575	0.2557	0.2416	0.2416	0.2222	0.2363	0.2628	0.2399	0.2681	0.2698	0.2628	0.231	0.2504	0.2328	0.2451	0.1922	0.2169	0.2152	0.2504	0.1199	0.1323	0.0952	0.1323	0.1129	0.1446	0.0988
Fungi_Release38	diplodia_seriata	G	0.3228	0.3051	0.3263	0.284	0.2963	0.3086	0.2698	0.3034	0.3316	0.2769	0.2734	0.3192	0.3051	0.2681	0.3298	0.3263	0.2857	0.3051	0.2857	0.3051	0.3139	0.3016	0.3086	0.3192	0.3545	0.3369	0.3721	0.2963	0.3228	0.3175	0.2628	0.3051	0.3245	0.2822	0.3051	0.3051	0.3069	0.3422	0.328	0.4056	0.5644	0.612	0.672	0.5344	0.5362	0.3651	0.4656
Fungi_Release38	diplodia_seriata	T	0.2187	0.2399	0.2011	0.2416	0.1993	0.2628	0.224	0.2028	0.2363	0.2169	0.2381	0.2116	0.2205	0.2575	0.2275	0.2116	0.2346	0.2257	0.2557	0.2381	0.2063	0.2275	0.231	0.2046	0.1852	0.2134	0.1817	0.2257	0.2257	0.1852	0.2381	0.2646	0.224	0.2628	0.254	0.2434	0.2804	0.2081	0.2169	0.1623	0.1164	0.1146	0.0794	0.1129	0.0988	0.2063	0.0635
Fungi_Release38	podospora_anserina_s_mat_	A	0.1943	0.2138	0.189	0.1961	0.2085	0.1943	0.2102	0.2067	0.2067	0.2527	0.2261	0.2155	0.2226	0.265	0.2491	0.2367	0.2438	0.2827	0.2473	0.2739	0.2597	0.2509	0.288	0.2774	0.2933	0.2915	0.2703	0.2367	0.2261	0.2756	0.2085	0.2403	0.2367	0.2686	0.2226	0.2774	0.2968	0.2809	0.2739	0.2102	0.2279	0.1837	0.1961	0.2438	0.2527	0.3657	0.5159
Fungi_Release38	podospora_anserina_s_mat_	C	0.2085	0.2138	0.2244	0.242	0.1996	0.2244	0.2332	0.2367	0.242	0.2155	0.2191	0.2102	0.2138	0.182	0.2032	0.2085	0.1767	0.159	0.1661	0.1625	0.1837	0.1908	0.1555	0.1678	0.1413	0.1625	0.1714	0.1802	0.1714	0.1608	0.1926	0.1873	0.1979	0.2155	0.242	0.2067	0.1714	0.1714	0.1625	0.1502	0.106	0.076	0.0936	0.083	0.0972	0.0724	0.1007
Fungi_Release38	podospora_anserina_s_mat_	G	0.2809	0.2527	0.265	0.258	0.3004	0.2756	0.2951	0.2721	0.2597	0.2756	0.2986	0.2792	0.318	0.2792	0.3286	0.3074	0.3233	0.3163	0.3198	0.3304	0.3322	0.3463	0.3251	0.3357	0.3304	0.3145	0.3498	0.3127	0.3534	0.3251	0.3074	0.2774	0.311	0.2509	0.2951	0.2473	0.2915	0.3216	0.3339	0.4541	0.5283	0.606	0.6007	0.5424	0.5124	0.4293	0.3251
Fungi_Release38	podospora_anserina_s_mat_	T	0.3163	0.3198	0.3216	0.3039	0.2915	0.3057	0.2615	0.2845	0.2915	0.2562	0.2562	0.2951	0.2456	0.2739	0.2191	0.2473	0.2562	0.242	0.2668	0.2332	0.2244	0.212	0.2314	0.2191	0.235	0.2314	0.2085	0.2703	0.2491	0.2385	0.2915	0.2951	0.2544	0.265	0.2403	0.2686	0.2403	0.2261	0.2297	0.1855	0.1378	0.1343	0.1095	0.1307	0.1378	0.1325	0.0583
Fungi_Release38	pseudogymnoascus_sp_vkm_f_4515_fw_2607_	A	0.2317	0.2371	0.2371	0.2193	0.2353	0.2531	0.2424	0.2442	0.1961	0.2246	0.2228	0.2442	0.2228	0.2513	0.2389	0.2692	0.262	0.2638	0.246	0.2656	0.2692	0.2656	0.2674	0.2549	0.2941	0.2781	0.287	0.2602	0.2923	0.262	0.2638	0.2513	0.2531	0.2995	0.2745	0.2709	0.2941	0.2799	0.3048	0.2585	0.2193	0.1996	0.1854	0.2157	0.2317	0.2941	0.4385
Fungi_Release38	pseudogymnoascus_sp_vkm_f_4515_fw_2607_	C	0.2068	0.1996	0.2228	0.221	0.2175	0.2193	0.2299	0.2175	0.2246	0.2638	0.2121	0.2121	0.2406	0.2496	0.2246	0.2353	0.2406	0.2264	0.2282	0.2317	0.1907	0.1996	0.205	0.2014	0.2193	0.1996	0.1693	0.1907	0.1783	0.1943	0.205	0.2264	0.2068	0.1693	0.2442	0.2032	0.2193	0.1907	0.1622	0.1907	0.1586	0.0784	0.082	0.0642	0.0802	0.0998	0.1123
Fungi_Release38	pseudogymnoascus_sp_vkm_f_4515_fw_2607_	G	0.2638	0.2834	0.2264	0.3012	0.2727	0.2816	0.2638	0.2478	0.2852	0.246	0.2424	0.2478	0.2727	0.2389	0.2727	0.2353	0.2371	0.2335	0.2549	0.262	0.2513	0.2781	0.2906	0.2816	0.2496	0.3084	0.2834	0.2941	0.2888	0.2602	0.2745	0.2371	0.2674	0.2656	0.2406	0.2299	0.2193	0.262	0.2585	0.3298	0.4902	0.59	0.6132	0.5704	0.5561	0.4046	0.3565
Fungi_Release38	pseudogymnoascus_sp_vkm_f_4515_fw_2607_	T	0.2977	0.2799	0.3137	0.2585	0.2745	0.246	0.2638	0.2906	0.2941	0.2656	0.3226	0.2959	0.2638	0.2602	0.2638	0.2602	0.2602	0.2763	0.2709	0.2406	0.2888	0.2567	0.2371	0.262	0.2371	0.2139	0.2602	0.2549	0.2406	0.2834	0.2567	0.2852	0.2727	0.2656	0.2406	0.2959	0.2674	0.2674	0.2745	0.221	0.1319	0.1319	0.1194	0.1497	0.1319	0.2014	0.0927
Fungi_Release38	ophiocordyceps_unilateralis	A	0.1628	0.2129	0.1807	0.1878	0.1771	0.1628	0.1896	0.1807	0.2004	0.186	0.1789	0.1986	0.1968	0.1896	0.22	0.2147	0.2039	0.2218	0.1878	0.2254	0.2093	0.2379	0.2039	0.2326	0.2308	0.2147	0.1825	0.2469	0.2218	0.2218	0.2308	0.2147	0.2451	0.2165	0.1896	0.1968	0.2343	0.2576	0.2469	0.1843	0.186	0.2129	0.1825	0.2004	0.2308	0.2522	0.4132
Fungi_Release38	ophiocordyceps_unilateralis	C	0.2791	0.254	0.2665	0.297	0.3041	0.3524	0.3292	0.2898	0.3292	0.3023	0.3041	0.3005	0.2934	0.3077	0.2934	0.2755	0.2862	0.2522	0.2683	0.2612	0.2469	0.2147	0.2701	0.2308	0.2451	0.254	0.2719	0.2397	0.2898	0.2558	0.263	0.2343	0.2415	0.2236	0.3059	0.2361	0.1932	0.2129	0.2021	0.254	0.1735	0.1306	0.1252	0.136	0.1467	0.1843	0.0948
Fungi_Release38	ophiocordyceps_unilateralis	G	0.2648	0.2701	0.2451	0.2648	0.2451	0.2218	0.2272	0.2683	0.2326	0.2236	0.2469	0.2361	0.2522	0.2397	0.2415	0.288	0.2504	0.3023	0.2665	0.2791	0.2952	0.3292	0.2826	0.3041	0.297	0.3184	0.3041	0.2844	0.2612	0.288	0.2809	0.2594	0.3184	0.3506	0.2809	0.3095	0.3292	0.3417	0.3453	0.4061	0.5474	0.5635	0.6047	0.5528	0.5492	0.4275	0.4347
Fungi_Release38	ophiocordyceps_unilateralis	T	0.2934	0.263	0.3077	0.2504	0.2737	0.263	0.254	0.2612	0.2379	0.288	0.2701	0.2648	0.2576	0.263	0.2451	0.2218	0.2594	0.2236	0.2773	0.2343	0.2487	0.2182	0.2433	0.2326	0.2272	0.2129	0.2415	0.229	0.2272	0.2343	0.2254	0.2916	0.195	0.2093	0.2236	0.2576	0.2433	0.1878	0.2057	0.1556	0.093	0.093	0.0877	0.1109	0.0733	0.136	0.0572
Fungi_Release38	aspergillus_glaucus_cbs_516_65	A	0.2083	0.2244	0.1921	0.2154	0.1903	0.2065	0.2442	0.1975	0.2172	0.1957	0.1993	0.2154	0.228	0.2083	0.2352	0.2244	0.246	0.2047	0.2478	0.2136	0.2531	0.237	0.2118	0.2657	0.289	0.2873	0.3178	0.2747	0.2765	0.2747	0.2567	0.298	0.3052	0.2478	0.2783	0.2531	0.2837	0.2783	0.2873	0.2621	0.3124	0.2621	0.1867	0.167	0.2029	0.2657	0.4291
Fungi_Release38	aspergillus_glaucus_cbs_516_65	C	0.2172	0.2208	0.2118	0.2101	0.2244	0.2334	0.2334	0.2478	0.2226	0.2675	0.2585	0.2334	0.246	0.2603	0.2244	0.2226	0.2083	0.2029	0.2011	0.1724	0.1706	0.1741	0.158	0.158	0.149	0.1616	0.1454	0.1849	0.1688	0.158	0.1903	0.1616	0.1957	0.1921	0.2083	0.1849	0.1885	0.1975	0.2047	0.1831	0.1418	0.1293	0.1059	0.07	0.0664	0.0664	0.1041
Fungi_Release38	aspergillus_glaucus_cbs_516_65	G	0.2406	0.2496	0.2747	0.219	0.2585	0.2478	0.1975	0.1903	0.228	0.1957	0.2154	0.219	0.2029	0.2172	0.2226	0.2442	0.2208	0.2549	0.246	0.2513	0.2639	0.2855	0.3034	0.307	0.2621	0.2801	0.2711	0.2855	0.2819	0.316	0.2729	0.2639	0.2496	0.2334	0.2603	0.2729	0.2442	0.2657	0.2478	0.2747	0.3752	0.4488	0.544	0.6104	0.623	0.4776	0.3968
Fungi_Release38	aspergillus_glaucus_cbs_516_65	T	0.3339	0.3052	0.3214	0.3555	0.3268	0.3124	0.325	0.3645	0.3321	0.3411	0.3268	0.3321	0.3232	0.3142	0.3178	0.3088	0.325	0.3375	0.3052	0.3627	0.3124	0.3034	0.3268	0.2693	0.2998	0.2711	0.2657	0.2549	0.2729	0.2513	0.2801	0.2765	0.2496	0.3268	0.2531	0.289	0.2837	0.2585	0.2603	0.2801	0.1706	0.1598	0.1634	0.1526	0.1077	0.1903	0.07
Fungi_Release38	colletotrichum_orbiculare	A	0.2118	0.2603	0.2208	0.2154	0.2531	0.2406	0.2262	0.2388	0.2244	0.2065	0.2118	0.2334	0.2316	0.2065	0.2208	0.2442	0.2298	0.2262	0.2388	0.246	0.2585	0.2424	0.2621	0.2478	0.2406	0.2621	0.2424	0.2567	0.2621	0.2298	0.2567	0.2244	0.2334	0.2603	0.2316	0.2352	0.2549	0.3106	0.3034	0.2101	0.2083	0.2118	0.1885	0.2065	0.1993	0.2657	0.4578
Fungi_Release38	colletotrichum_orbiculare	C	0.2639	0.228	0.2388	0.2675	0.2621	0.2908	0.2531	0.2531	0.289	0.2962	0.2711	0.2424	0.2567	0.2783	0.228	0.2334	0.2496	0.2406	0.2101	0.2424	0.2136	0.2316	0.2083	0.1724	0.2406	0.1993	0.1993	0.2083	0.2011	0.2442	0.2406	0.2316	0.2442	0.2316	0.2765	0.2747	0.2496	0.2316	0.228	0.2478	0.1759	0.1418	0.1185	0.1041	0.0934	0.1562	0.0898
Fungi_Release38	colletotrichum_orbiculare	G	0.2675	0.2442	0.2675	0.2962	0.2352	0.2478	0.2567	0.2424	0.2244	0.2226	0.2675	0.2424	0.2693	0.2765	0.2801	0.2675	0.2765	0.2729	0.3016	0.2621	0.2675	0.2639	0.2962	0.3447	0.289	0.2962	0.3447	0.2729	0.2837	0.2944	0.2496	0.2711	0.2801	0.2388	0.246	0.246	0.2549	0.2567	0.3016	0.3573	0.4937	0.5278	0.5978	0.5673	0.5925	0.4237	0.3806
Fungi_Release38	colletotrichum_orbiculare	T	0.2567	0.2675	0.2729	0.2208	0.2496	0.2208	0.2639	0.2657	0.2621	0.2747	0.2496	0.2819	0.2424	0.2388	0.2711	0.2549	0.2442	0.2603	0.2496	0.2496	0.2603	0.2621	0.2334	0.2352	0.2298	0.2424	0.2136	0.2621	0.2531	0.2316	0.2531	0.2729	0.2424	0.2693	0.246	0.2442	0.2406	0.2011	0.167	0.1849	0.1221	0.1185	0.0952	0.1221	0.1149	0.1544	0.0718
Fungi_Release38	colletotrichum_higginsianum_imi_349063	A	0.2164	0.2345	0.2255	0.2345	0.2236	0.2127	0.2382	0.2455	0.2564	0.22	0.2764	0.2164	0.2091	0.2527	0.22	0.2564	0.2309	0.2545	0.2582	0.2473	0.2291	0.2473	0.2636	0.2127	0.2473	0.2564	0.2255	0.2345	0.24	0.2345	0.2255	0.2564	0.2164	0.2582	0.2564	0.2382	0.2636	0.2727	0.2509	0.2073	0.2055	0.1855	0.2182	0.2236	0.2436	0.32	0.4964
Fungi_Release38	colletotrichum_higginsianum_imi_349063	C	0.2527	0.2618	0.2782	0.2709	0.2745	0.3091	0.2873	0.2745	0.2727	0.2891	0.22	0.2927	0.2582	0.2491	0.2509	0.2364	0.2582	0.2473	0.2309	0.2473	0.2509	0.2436	0.2509	0.2309	0.2182	0.2255	0.2836	0.2327	0.2418	0.2509	0.22	0.26	0.2582	0.2764	0.2782	0.2673	0.24	0.2673	0.28	0.2636	0.1545	0.1473	0.1091	0.1127	0.12	0.1436	0.1164
Fungi_Release38	colletotrichum_higginsianum_imi_349063	G	0.2891	0.2473	0.2327	0.2527	0.2564	0.2291	0.2309	0.2564	0.2582	0.2727	0.2436	0.2491	0.2818	0.2545	0.2564	0.2564	0.2636	0.2436	0.2636	0.2673	0.2691	0.2545	0.2691	0.2836	0.2982	0.2582	0.2636	0.2636	0.2473	0.2836	0.2873	0.2255	0.2582	0.2236	0.2055	0.2345	0.28	0.2564	0.2873	0.3855	0.5236	0.5745	0.5655	0.5436	0.5309	0.3873	0.32
Fungi_Release38	colletotrichum_higginsianum_imi_349063	T	0.2418	0.2564	0.2636	0.2418	0.2455	0.2491	0.2436	0.2236	0.2127	0.2182	0.26	0.2418	0.2509	0.2436	0.2727	0.2509	0.2473	0.2545	0.2473	0.2382	0.2509	0.2545	0.2164	0.2727	0.2364	0.26	0.2273	0.2691	0.2709	0.2309	0.2673	0.2582	0.2673	0.2418	0.26	0.26	0.2164	0.2036	0.1818	0.1436	0.1164	0.0927	0.1073	0.12	0.1055	0.1491	0.0673
Fungi_Release38	coccidioides_immitis_rmscc_3703	A	0.2149	0.2313	0.2313	0.2404	0.2678	0.2332	0.2732	0.2568	0.2313	0.2259	0.2386	0.2568	0.2495	0.2641	0.2659	0.2332	0.2368	0.2459	0.2404	0.2514	0.2732	0.235	0.255	0.2951	0.2659	0.2714	0.2951	0.2587	0.2477	0.2477	0.235	0.2532	0.2659	0.275	0.2332	0.2222	0.2696	0.2477	0.2678	0.1967	0.2204	0.1876	0.2022	0.235	0.2277	0.2514	0.4171
Fungi_Release38	coccidioides_immitis_rmscc_3703	C	0.2441	0.2149	0.2404	0.2295	0.2168	0.255	0.224	0.2459	0.2277	0.2495	0.2459	0.2423	0.2605	0.2787	0.2259	0.2204	0.2077	0.2222	0.2149	0.2459	0.2313	0.2332	0.224	0.1858	0.2204	0.2259	0.2022	0.2186	0.2277	0.2423	0.2131	0.2022	0.1985	0.2131	0.2295	0.2787	0.2113	0.2332	0.173	0.1894	0.1311	0.082	0.0893	0.0984	0.1148	0.1275	0.0911
Fungi_Release38	coccidioides_immitis_rmscc_3703	G	0.2623	0.2696	0.2459	0.2404	0.2204	0.2186	0.2459	0.2313	0.2168	0.2168	0.2368	0.2295	0.204	0.2077	0.2423	0.255	0.2459	0.2532	0.2459	0.235	0.2149	0.2459	0.255	0.2659	0.235	0.2186	0.2058	0.1803	0.2459	0.2149	0.2222	0.2113	0.224	0.2113	0.2404	0.2058	0.235	0.2441	0.3078	0.3607	0.4736	0.6011	0.6047	0.5191	0.5301	0.4007	0.377
Fungi_Release38	coccidioides_immitis_rmscc_3703	T	0.2787	0.2842	0.2823	0.2896	0.2951	0.2933	0.2568	0.2659	0.3242	0.3078	0.2787	0.2714	0.286	0.2495	0.2659	0.2914	0.3097	0.2787	0.2987	0.2678	0.2805	0.286	0.2659	0.2532	0.2787	0.2842	0.2969	0.3424	0.2787	0.2951	0.3297	0.3333	0.3115	0.3005	0.2969	0.2933	0.2842	0.275	0.2514	0.2532	0.1749	0.1293	0.1038	0.1475	0.1275	0.2204	0.1148
Fungi_Release38	coccidioides_immitis_rmscc_2394	A	0.2048	0.2343	0.2454	0.2362	0.2675	0.2343	0.262	0.2491	0.2196	0.2306	0.2103	0.2454	0.2546	0.2565	0.2768	0.2288	0.2417	0.2417	0.2583	0.2417	0.2675	0.2325	0.2417	0.3007	0.2694	0.2915	0.2841	0.2472	0.2399	0.2454	0.2251	0.2583	0.2989	0.2546	0.238	0.2417	0.2675	0.2823	0.2657	0.1771	0.214	0.1937	0.1808	0.2435	0.2399	0.2731	0.4262
Fungi_Release38	coccidioides_immitis_rmscc_2394	C	0.2454	0.1974	0.2454	0.2417	0.2343	0.2583	0.2306	0.2491	0.2435	0.2528	0.2638	0.2454	0.262	0.2472	0.2491	0.2306	0.2122	0.19	0.203	0.2435	0.2232	0.2399	0.2306	0.1771	0.2232	0.2269	0.1993	0.2288	0.2196	0.2214	0.214	0.1993	0.2103	0.1993	0.2472	0.2657	0.2048	0.2177	0.2159	0.2232	0.1236	0.0867	0.0793	0.0923	0.1181	0.1199	0.107
Fungi_Release38	coccidioides_immitis_rmscc_2394	G	0.2528	0.2749	0.2232	0.2472	0.2066	0.2177	0.2269	0.2362	0.2269	0.1993	0.2214	0.2472	0.1956	0.2159	0.203	0.2435	0.2583	0.2638	0.2306	0.2509	0.2269	0.2343	0.2472	0.2528	0.2325	0.203	0.2251	0.1753	0.2472	0.2122	0.2214	0.2232	0.2011	0.2214	0.2417	0.203	0.2159	0.2306	0.2731	0.3469	0.4963	0.6125	0.6365	0.5369	0.5148	0.3782	0.3506
Fungi_Release38	coccidioides_immitis_rmscc_2394	T	0.297	0.2934	0.286	0.2749	0.2915	0.2897	0.2804	0.2657	0.31	0.3173	0.3044	0.262	0.2878	0.2804	0.2712	0.297	0.2878	0.3044	0.3081	0.2638	0.2823	0.2934	0.2804	0.2694	0.2749	0.2786	0.2915	0.3487	0.2934	0.321	0.3395	0.3192	0.2897	0.3247	0.2731	0.2897	0.3118	0.2694	0.2454	0.2528	0.1661	0.107	0.1033	0.1273	0.1273	0.2288	0.1162
Fungi_Release38	fonsecaea_pedrosoi_cbs_271_37	A	0.2325	0.2417	0.2269	0.2159	0.2583	0.203	0.2232	0.2325	0.2288	0.2269	0.2066	0.2528	0.2399	0.2454	0.238	0.2749	0.262	0.2712	0.2583	0.2638	0.2362	0.2472	0.2601	0.2362	0.2601	0.2897	0.2657	0.2823	0.2657	0.2786	0.2583	0.2638	0.2749	0.2509	0.2491	0.2122	0.2546	0.2546	0.2491	0.19	0.19	0.1753	0.1808	0.2362	0.2657	0.3376	0.5166
Fungi_Release38	fonsecaea_pedrosoi_cbs_271_37	C	0.262	0.2731	0.2546	0.2306	0.2657	0.2712	0.2565	0.2694	0.2657	0.2675	0.2638	0.2841	0.2749	0.2325	0.286	0.2491	0.2472	0.2417	0.2491	0.2269	0.2583	0.214	0.2048	0.2491	0.2306	0.2232	0.2509	0.2491	0.2546	0.2528	0.2565	0.2343	0.238	0.2343	0.2583	0.2638	0.2177	0.2103	0.2196	0.2214	0.1605	0.1125	0.1033	0.0978	0.0978	0.1144	0.107
Fungi_Release38	fonsecaea_pedrosoi_cbs_271_37	G	0.2454	0.2362	0.2454	0.238	0.2288	0.2435	0.2454	0.2269	0.203	0.2232	0.2417	0.203	0.2528	0.2454	0.2491	0.2325	0.1956	0.2177	0.2177	0.2251	0.2638	0.2528	0.2509	0.262	0.238	0.2565	0.2103	0.2214	0.238	0.2196	0.1993	0.2196	0.2122	0.2269	0.2048	0.2269	0.2491	0.2675	0.321	0.3875	0.5074	0.583	0.6292	0.5314	0.5258	0.3579	0.3007
Fungi_Release38	fonsecaea_pedrosoi_cbs_271_37	T	0.2601	0.2491	0.2731	0.3155	0.2472	0.2823	0.2749	0.2712	0.3026	0.2823	0.2878	0.2601	0.2325	0.2768	0.2269	0.2435	0.2952	0.2694	0.2749	0.2841	0.2417	0.286	0.2841	0.2528	0.2712	0.2306	0.2731	0.2472	0.2417	0.2491	0.286	0.2823	0.2749	0.2878	0.2878	0.297	0.2786	0.2675	0.2103	0.2011	0.1421	0.1292	0.0867	0.1347	0.1107	0.19	0.0756
Fungi_Release38	rachicladosporium_antarcticum	A	0.2111	0.2019	0.2037	0.2352	0.2556	0.2352	0.2259	0.2315	0.2204	0.2259	0.2352	0.213	0.2241	0.2074	0.25	0.2148	0.2241	0.2778	0.2778	0.2593	0.237	0.2444	0.2222	0.2278	0.2593	0.287	0.2444	0.2519	0.287	0.2704	0.2519	0.2574	0.2241	0.2889	0.2167	0.2037	0.2185	0.2667	0.3111	0.2093	0.2519	0.2574	0.2148	0.237	0.187	0.1852	0.3778
Fungi_Release38	rachicladosporium_antarcticum	C	0.2037	0.2222	0.2148	0.2241	0.2593	0.2296	0.2611	0.2315	0.2167	0.237	0.2259	0.2481	0.2241	0.2611	0.263	0.2407	0.2259	0.2056	0.1667	0.2167	0.1889	0.1963	0.2093	0.2074	0.213	0.1944	0.1926	0.1796	0.1963	0.2537	0.2037	0.1981	0.2352	0.2278	0.2759	0.2759	0.1667	0.1704	0.2426	0.237	0.1704	0.1389	0.1019	0.1148	0.1019	0.1574	0.0852
Fungi_Release38	rachicladosporium_antarcticum	G	0.3167	0.337	0.3463	0.2685	0.2815	0.287	0.2722	0.2704	0.3093	0.313	0.2759	0.3352	0.3148	0.3037	0.2833	0.337	0.313	0.3019	0.3185	0.3148	0.3407	0.3426	0.3315	0.3574	0.3352	0.3259	0.3648	0.3148	0.3074	0.2389	0.3204	0.3111	0.2889	0.2444	0.2759	0.2667	0.3278	0.3926	0.3056	0.3574	0.4574	0.5148	0.5593	0.5296	0.5815	0.4759	0.4852
Fungi_Release38	rachicladosporium_antarcticum	T	0.2685	0.2389	0.2352	0.2722	0.2037	0.2481	0.2407	0.2667	0.2537	0.2241	0.263	0.2037	0.237	0.2278	0.2037	0.2074	0.237	0.2148	0.237	0.2093	0.2333	0.2167	0.237	0.2074	0.1926	0.1926	0.1981	0.2537	0.2093	0.237	0.2241	0.2333	0.2519	0.2389	0.2315	0.2537	0.287	0.1704	0.1407	0.1963	0.1204	0.0889	0.1241	0.1185	0.1296	0.1815	0.0519
Fungi_Release38	paraphaeosphaeria_sporulosa	A	0.2245	0.243	0.2356	0.2152	0.2319	0.2059	0.2208	0.2393	0.2245	0.2301	0.2338	0.2449	0.2171	0.2523	0.2579	0.2505	0.2523	0.2319	0.2226	0.2597	0.2356	0.2319	0.2486	0.2356	0.2597	0.2857	0.2449	0.269	0.2764	0.2672	0.2505	0.2301	0.2449	0.2468	0.2709	0.2319	0.2727	0.2857	0.3154	0.3321	0.2857	0.2189	0.1651	0.18	0.141	0.2004	0.4174
Fungi_Release38	paraphaeosphaeria_sporulosa	C	0.2282	0.2022	0.2375	0.2468	0.2245	0.243	0.2783	0.2412	0.2672	0.2412	0.2801	0.2839	0.2968	0.243	0.1985	0.269	0.2523	0.2356	0.2616	0.2356	0.2004	0.2245	0.2152	0.1985	0.1948	0.1967	0.2171	0.2152	0.2078	0.2115	0.2301	0.1892	0.1985	0.2486	0.2115	0.2505	0.2393	0.2263	0.1651	0.2208	0.1837	0.1503	0.1002	0.0853	0.0761	0.1317	0.0872
Fungi_Release38	paraphaeosphaeria_sporulosa	G	0.2746	0.3024	0.2913	0.2672	0.2746	0.3024	0.2152	0.282	0.243	0.2468	0.2152	0.2338	0.2338	0.2616	0.2597	0.2523	0.2931	0.2764	0.256	0.2505	0.3173	0.2783	0.2857	0.3302	0.3006	0.282	0.3377	0.3154	0.3098	0.2746	0.2709	0.3154	0.3117	0.2486	0.2393	0.2338	0.2096	0.1874	0.2727	0.256	0.384	0.4991	0.6067	0.6067	0.6865	0.5102	0.4564
Fungi_Release38	paraphaeosphaeria_sporulosa	T	0.2727	0.2523	0.2356	0.2709	0.269	0.2486	0.2857	0.2375	0.2653	0.282	0.2709	0.2375	0.2523	0.243	0.2839	0.2282	0.2022	0.256	0.2597	0.2542	0.2468	0.2653	0.2505	0.2356	0.2449	0.2356	0.2004	0.2004	0.2059	0.2468	0.2486	0.2653	0.2449	0.256	0.2783	0.2839	0.2783	0.3006	0.2468	0.1911	0.1466	0.1317	0.128	0.128	0.0965	0.1577	0.039
Fungi_Release38	colletotrichum_higginsianum	A	0.209	0.2276	0.222	0.222	0.2276	0.2369	0.2332	0.2313	0.2668	0.209	0.2556	0.2108	0.2108	0.2295	0.2332	0.2369	0.2257	0.2332	0.2575	0.2425	0.2369	0.2276	0.2407	0.2313	0.2407	0.2556	0.2388	0.2332	0.2351	0.2612	0.2164	0.2444	0.222	0.2631	0.2481	0.2332	0.2761	0.2612	0.2593	0.1959	0.2201	0.1847	0.2164	0.2052	0.2332	0.3134	0.4776
Fungi_Release38	colletotrichum_higginsianum	C	0.278	0.2593	0.2948	0.2892	0.2668	0.2873	0.278	0.2892	0.2593	0.3022	0.2519	0.2929	0.2593	0.2705	0.2463	0.2649	0.2668	0.2743	0.2369	0.2407	0.2388	0.2407	0.2481	0.2108	0.2407	0.194	0.2649	0.2407	0.2612	0.2369	0.2313	0.2425	0.25	0.2948	0.2743	0.2687	0.222	0.2631	0.2836	0.2649	0.1511	0.1642	0.1138	0.1138	0.1045	0.1175	0.1231
Fungi_Release38	colletotrichum_higginsianum	G	0.2705	0.2649	0.2407	0.2407	0.2687	0.2407	0.25	0.2631	0.2425	0.2612	0.2481	0.25	0.2873	0.2612	0.2313	0.2724	0.2519	0.2369	0.2612	0.2854	0.2817	0.2743	0.2817	0.2873	0.2873	0.3022	0.2761	0.2593	0.2537	0.2593	0.2799	0.2407	0.2463	0.2201	0.2164	0.2407	0.2705	0.2668	0.2836	0.3993	0.5336	0.5578	0.5634	0.5448	0.5597	0.4104	0.3451
Fungi_Release38	colletotrichum_higginsianum	T	0.2425	0.2481	0.2425	0.2481	0.2369	0.2351	0.2388	0.2164	0.2313	0.2276	0.2444	0.2463	0.2425	0.2388	0.2892	0.2257	0.2556	0.2556	0.2444	0.2313	0.2425	0.2575	0.2295	0.2705	0.2313	0.2481	0.2201	0.2668	0.25	0.2425	0.2724	0.2724	0.2817	0.222	0.2612	0.2575	0.2313	0.209	0.1735	0.1399	0.0951	0.0933	0.1063	0.1362	0.1026	0.1586	0.0541
Fungi_Release38	aspergillus_sydowii_cbs_593_65	A	0.2617	0.2224	0.215	0.2449	0.2374	0.2579	0.2243	0.2467	0.2318	0.2318	0.2411	0.271	0.2168	0.2561	0.2318	0.2112	0.2374	0.2299	0.2598	0.2486	0.2617	0.2393	0.2449	0.2692	0.243	0.2579	0.3084	0.2393	0.2841	0.2841	0.2561	0.2692	0.2505	0.2729	0.3103	0.286	0.271	0.2822	0.2505	0.2579	0.3009	0.2393	0.1757	0.1963	0.2112	0.2561	0.4318
Fungi_Release38	aspergillus_sydowii_cbs_593_65	C	0.2206	0.2636	0.2243	0.2411	0.2561	0.2411	0.243	0.243	0.271	0.2393	0.2505	0.2561	0.2505	0.2411	0.2486	0.2486	0.2505	0.1981	0.2374	0.2131	0.2037	0.2093	0.2299	0.2206	0.2262	0.185	0.1869	0.215	0.2037	0.2206	0.2299	0.2505	0.2561	0.2019	0.2243	0.1869	0.2019	0.2486	0.2224	0.1757	0.1159	0.1327	0.1103	0.0822	0.0766	0.0673	0.0991
Fungi_Release38	aspergillus_sydowii_cbs_593_65	G	0.228	0.2355	0.2336	0.2262	0.1832	0.2	0.2075	0.2075	0.1944	0.172	0.2	0.1907	0.2467	0.2112	0.1944	0.1869	0.2206	0.2393	0.2393	0.228	0.2243	0.2374	0.2467	0.2093	0.2336	0.2654	0.1981	0.2766	0.2262	0.2299	0.2056	0.185	0.2093	0.1963	0.1907	0.2318	0.2299	0.2318	0.2636	0.3159	0.4393	0.5047	0.557	0.5533	0.5776	0.4729	0.3907
Fungi_Release38	aspergillus_sydowii_cbs_593_65	T	0.2897	0.2785	0.3271	0.2879	0.3234	0.3009	0.3252	0.3028	0.3028	0.357	0.3084	0.2822	0.286	0.2916	0.3252	0.3533	0.2916	0.3327	0.2636	0.3103	0.3103	0.314	0.2785	0.3009	0.2972	0.2916	0.3065	0.2692	0.286	0.2654	0.3084	0.2953	0.2841	0.329	0.2748	0.2953	0.2972	0.2374	0.2636	0.2505	0.1439	0.1234	0.157	0.1682	0.1346	0.2037	0.0785
Fungi_Release38	purpureocillium_lilacinum_gca_001653265	A	0.2109	0.2015	0.194	0.2053	0.194	0.2166	0.2053	0.1996	0.1921	0.2298	0.2185	0.2241	0.2618	0.2222	0.2109	0.2053	0.209	0.2128	0.2222	0.2222	0.2354	0.2354	0.1864	0.2467	0.2467	0.2561	0.2222	0.2467	0.2185	0.2015	0.1902	0.2429	0.2655	0.2392	0.2354	0.2053	0.2524	0.2241	0.2731	0.2034	0.2448	0.1921	0.1789	0.162	0.2185	0.2373	0.3672
Fungi_Release38	purpureocillium_lilacinum_gca_001653265	C	0.2599	0.2448	0.2787	0.2806	0.2731	0.2825	0.3258	0.3013	0.3032	0.2768	0.275	0.3032	0.3051	0.2693	0.258	0.2938	0.2599	0.2994	0.2712	0.2486	0.2731	0.2411	0.2768	0.2448	0.2467	0.2335	0.2881	0.2335	0.2298	0.2693	0.275	0.258	0.2166	0.2825	0.2373	0.3145	0.209	0.2637	0.2373	0.2825	0.1657	0.1601	0.1036	0.1695	0.1262	0.1412	0.1205
Fungi_Release38	purpureocillium_lilacinum_gca_001653265	G	0.3013	0.2938	0.2655	0.2976	0.2825	0.2542	0.2787	0.2674	0.2542	0.2693	0.3013	0.2524	0.2147	0.2618	0.3013	0.2674	0.307	0.2881	0.2919	0.2881	0.2863	0.2994	0.3126	0.2881	0.2957	0.2994	0.3089	0.2712	0.3239	0.29	0.3145	0.2806	0.258	0.2561	0.2825	0.2486	0.2787	0.322	0.2976	0.3296	0.4915	0.5386	0.6158	0.5706	0.5254	0.4539	0.4482
Fungi_Release38	purpureocillium_lilacinum_gca_001653265	T	0.2279	0.2599	0.2618	0.2166	0.2505	0.2467	0.1902	0.2316	0.2505	0.2241	0.2053	0.2203	0.2185	0.2467	0.2298	0.2335	0.2241	0.1996	0.2147	0.2411	0.2053	0.2241	0.2241	0.2203	0.2109	0.2109	0.1808	0.2486	0.2279	0.2392	0.2203	0.2185	0.2599	0.2222	0.2448	0.2316	0.2599	0.1902	0.1921	0.1846	0.0979	0.1092	0.1017	0.0979	0.1299	0.1676	0.064
Fungi_Release38	kwoniella_heveanensis_cbs_569	A	0.2514	0.2363	0.2155	0.2193	0.2042	0.2344	0.225	0.2476	0.2325	0.225	0.2382	0.2193	0.2457	0.2363	0.2684	0.2325	0.276	0.2628	0.2306	0.2684	0.2457	0.225	0.2325	0.2306	0.2552	0.2628	0.2098	0.2268	0.2382	0.225	0.2325	0.2023	0.2268	0.1777	0.2231	0.1947	0.1947	0.206	0.1871	0.1285	0.172	0.1645	0.1569	0.2042	0.2495	0.2552	0.4291
Fungi_Release38	kwoniella_heveanensis_cbs_569	C	0.2306	0.2268	0.2628	0.2873	0.2552	0.2231	0.259	0.259	0.2628	0.2193	0.206	0.2268	0.2231	0.2401	0.2268	0.2155	0.2514	0.2023	0.2287	0.225	0.2382	0.2571	0.2363	0.2344	0.2495	0.2382	0.2306	0.2514	0.2325	0.1909	0.225	0.2476	0.2382	0.2665	0.259	0.2268	0.2117	0.1985	0.2155	0.2306	0.1229	0.1078	0.0983	0.1323	0.1078	0.1456	0.0662
Fungi_Release38	kwoniella_heveanensis_cbs_569	G	0.2287	0.276	0.2476	0.225	0.2741	0.2817	0.2136	0.259	0.2703	0.276	0.2817	0.2854	0.2817	0.2722	0.2457	0.3043	0.2344	0.2779	0.2854	0.276	0.2665	0.2571	0.2684	0.2703	0.2212	0.2703	0.2741	0.2495	0.2268	0.2741	0.2514	0.2609	0.2344	0.2798	0.225	0.276	0.2836	0.31	0.3214	0.3667	0.5482	0.5728	0.6219	0.5047	0.5255	0.4026	0.4216
Fungi_Release38	kwoniella_heveanensis_cbs_569	T	0.2892	0.2609	0.2741	0.2684	0.2665	0.2609	0.3025	0.2344	0.2344	0.2798	0.2741	0.2684	0.2495	0.2514	0.259	0.2476	0.2382	0.2571	0.2552	0.2306	0.2495	0.2609	0.2628	0.2647	0.2741	0.2287	0.2854	0.2722	0.3025	0.31	0.2911	0.2892	0.3006	0.276	0.293	0.3025	0.31	0.2854	0.276	0.2741	0.1569	0.155	0.1229	0.1588	0.1172	0.1966	0.0832
Fungi_Release38	phycomyces_blakesleeanus_nrrl_1555_	A	0.3466	0.358	0.3333	0.322	0.3466	0.3466	0.3428	0.3674	0.3542	0.3277	0.3674	0.3295	0.3523	0.3542	0.3598	0.3542	0.358	0.3561	0.3523	0.3087	0.3409	0.3239	0.3295	0.2955	0.3068	0.3068	0.3333	0.2822	0.3371	0.2973	0.3295	0.303	0.286	0.2708	0.3125	0.2519	0.2633	0.2045	0.1913	0.1288	0.1591	0.1875	0.1837	0.2424	0.3201	0.4034	0.4792
Fungi_Release38	phycomyces_blakesleeanus_nrrl_1555_	C	0.1856	0.1193	0.1477	0.1591	0.161	0.1553	0.1761	0.125	0.1212	0.1269	0.1705	0.142	0.125	0.1383	0.1364	0.142	0.1174	0.1288	0.1364	0.1269	0.1439	0.125	0.1742	0.1572	0.1534	0.1723	0.1496	0.1439	0.1231	0.1534	0.1098	0.1591	0.1136	0.1761	0.1061	0.142	0.1231	0.1364	0.1155	0.1098	0.0606	0.0379	0.0663	0.0549	0.0777	0.0701	0.0739
Fungi_Release38	phycomyces_blakesleeanus_nrrl_1555_	G	0.1648	0.1591	0.1837	0.1667	0.1818	0.1648	0.1818	0.1629	0.1648	0.1799	0.1307	0.142	0.1818	0.1515	0.1591	0.1439	0.142	0.1345	0.1515	0.1553	0.1705	0.1648	0.142	0.1591	0.1818	0.1402	0.1458	0.1345	0.1894	0.1629	0.1534	0.1326	0.1326	0.1648	0.1742	0.197	0.2311	0.2311	0.3011	0.3977	0.5966	0.5928	0.5758	0.4489	0.4394	0.2917	0.2898
Fungi_Release38	phycomyces_blakesleeanus_nrrl_1555_	T	0.303	0.3636	0.3352	0.3523	0.3106	0.3333	0.2992	0.3447	0.3598	0.3655	0.3314	0.3864	0.3409	0.3561	0.3447	0.3598	0.3826	0.3807	0.3598	0.4091	0.3447	0.3864	0.3542	0.3883	0.358	0.3807	0.3712	0.4394	0.3504	0.3864	0.4072	0.4053	0.4678	0.3883	0.4072	0.4091	0.3826	0.428	0.392	0.3636	0.1837	0.1818	0.1742	0.2538	0.1629	0.2348	0.1572
Fungi_Release38	talaromyces_marneffei_atcc_18224	A	0.2292	0.2235	0.1951	0.2405	0.2633	0.2348	0.2462	0.2311	0.2273	0.2822	0.2784	0.2405	0.2708	0.2879	0.2765	0.2481	0.2727	0.2576	0.2822	0.2879	0.3087	0.322	0.3163	0.3201	0.3163	0.2992	0.303	0.3239	0.3011	0.2689	0.3068	0.3277	0.3068	0.3163	0.286	0.2519	0.3258	0.2633	0.25	0.2197	0.2746	0.1913	0.1402	0.1515	0.2235	0.3049	0.5682
Fungi_Release38	talaromyces_marneffei_atcc_18224	C	0.2538	0.2822	0.2917	0.286	0.2689	0.2973	0.2367	0.2879	0.2614	0.233	0.2292	0.2254	0.233	0.2064	0.2292	0.197	0.1856	0.2045	0.1799	0.1761	0.1667	0.1553	0.1799	0.1705	0.1686	0.1591	0.161	0.1723	0.1913	0.1799	0.1989	0.2102	0.178	0.2064	0.1932	0.1875	0.1515	0.1629	0.1458	0.1629	0.0871	0.0833	0.0587	0.0549	0.0852	0.0568	0.0492
Fungi_Release38	talaromyces_marneffei_atcc_18224	G	0.1705	0.1515	0.161	0.1383	0.1515	0.1629	0.1667	0.1553	0.1667	0.1742	0.1799	0.197	0.1894	0.2121	0.178	0.2121	0.2367	0.2254	0.2027	0.2519	0.233	0.2348	0.2197	0.2064	0.2386	0.2614	0.2273	0.2008	0.214	0.2159	0.1932	0.1894	0.2121	0.1667	0.1932	0.2519	0.2273	0.2595	0.3068	0.3523	0.4564	0.5549	0.6458	0.6326	0.5644	0.4413	0.2917
Fungi_Release38	talaromyces_marneffei_atcc_18224	T	0.3466	0.3428	0.3523	0.3352	0.3163	0.3049	0.3504	0.3258	0.3447	0.3106	0.3125	0.3371	0.3068	0.2936	0.3163	0.3428	0.3049	0.3125	0.3352	0.2841	0.2917	0.2879	0.2841	0.303	0.2765	0.2803	0.3087	0.303	0.2936	0.3352	0.3011	0.2727	0.303	0.3106	0.3277	0.3087	0.2955	0.3144	0.2973	0.2652	0.1818	0.1705	0.1553	0.161	0.1269	0.197	0.0909
Fungi_Release38	coccidioides_posadasii_rmscc_3488	A	0.2305	0.2286	0.2419	0.2495	0.2648	0.2438	0.2438	0.2686	0.2324	0.2229	0.221	0.2724	0.2286	0.2857	0.259	0.2381	0.2305	0.2381	0.2571	0.259	0.24	0.2705	0.261	0.3067	0.2533	0.2438	0.2476	0.2571	0.261	0.2724	0.2552	0.24	0.2743	0.2533	0.24	0.2438	0.2305	0.2648	0.2724	0.2171	0.2324	0.2152	0.1905	0.2514	0.2457	0.2762	0.4381
Fungi_Release38	coccidioides_posadasii_rmscc_3488	C	0.2305	0.2152	0.24	0.2381	0.2419	0.2171	0.2495	0.2267	0.2438	0.2381	0.2286	0.24	0.2419	0.2495	0.2629	0.259	0.2019	0.1886	0.1905	0.2362	0.2038	0.2438	0.219	0.1638	0.1924	0.2362	0.2248	0.2286	0.2114	0.2171	0.2038	0.1981	0.2019	0.2095	0.24	0.2533	0.219	0.2171	0.2038	0.1771	0.101	0.0914	0.0724	0.0914	0.12	0.1219	0.1124
Fungi_Release38	coccidioides_posadasii_rmscc_3488	G	0.2476	0.2857	0.221	0.2248	0.2095	0.2476	0.2152	0.2114	0.221	0.2419	0.2514	0.2152	0.2305	0.2171	0.2229	0.2171	0.2476	0.261	0.2419	0.24	0.2495	0.2	0.2667	0.2248	0.24	0.2152	0.2133	0.1867	0.2171	0.2057	0.1905	0.2133	0.24	0.2171	0.219	0.2038	0.2381	0.2343	0.2686	0.3238	0.4876	0.6038	0.6229	0.5257	0.5067	0.3924	0.3543
Fungi_Release38	coccidioides_posadasii_rmscc_3488	T	0.2914	0.2705	0.2971	0.2876	0.2838	0.2914	0.2914	0.2933	0.3029	0.2971	0.299	0.2724	0.299	0.2476	0.2552	0.2857	0.32	0.3124	0.3105	0.2648	0.3067	0.2857	0.2533	0.3048	0.3143	0.3048	0.3143	0.3276	0.3105	0.3048	0.3505	0.3486	0.2838	0.32	0.301	0.299	0.3124	0.2838	0.2552	0.2819	0.179	0.0895	0.1143	0.1314	0.1276	0.2095	0.0952
Fungi_Release38	aspergillus_clavatus	A	0.2126	0.2088	0.2146	0.205	0.2261	0.205	0.1973	0.2146	0.2126	0.1935	0.2011	0.2184	0.2203	0.2069	0.2567	0.2395	0.2471	0.2165	0.2222	0.2088	0.2433	0.228	0.2337	0.2241	0.2644	0.2586	0.2567	0.251	0.2778	0.2605	0.251	0.2797	0.2395	0.2452	0.2701	0.2261	0.2452	0.2548	0.2548	0.2318	0.2452	0.1858	0.1686	0.1782	0.1973	0.2893	0.4655
Fungi_Release38	aspergillus_clavatus	C	0.2452	0.2663	0.2356	0.249	0.2318	0.205	0.2529	0.251	0.249	0.2548	0.2529	0.2165	0.2759	0.2356	0.2375	0.2261	0.2567	0.2682	0.2165	0.2241	0.2337	0.2222	0.2146	0.2203	0.2241	0.2126	0.2261	0.2529	0.2088	0.1916	0.2414	0.2069	0.2011	0.2395	0.2203	0.2069	0.2069	0.2126	0.2375	0.1782	0.1054	0.1149	0.0996	0.09	0.09	0.0958	0.1111
Fungi_Release38	aspergillus_clavatus	G	0.2548	0.2318	0.249	0.2261	0.2318	0.2452	0.2299	0.2318	0.2165	0.2605	0.2586	0.2529	0.2146	0.2625	0.2356	0.2337	0.2126	0.2375	0.2739	0.2663	0.2184	0.2452	0.251	0.272	0.2739	0.2989	0.2433	0.2184	0.249	0.272	0.251	0.2165	0.2299	0.251	0.2203	0.2356	0.2644	0.2663	0.2797	0.3793	0.5096	0.592	0.5977	0.6073	0.5862	0.4444	0.3199
Fungi_Release38	aspergillus_clavatus	T	0.2874	0.2931	0.3008	0.3199	0.3103	0.3448	0.3199	0.3027	0.3218	0.2912	0.2874	0.3123	0.2893	0.295	0.2701	0.3008	0.2835	0.2778	0.2874	0.3008	0.3046	0.3046	0.3008	0.2835	0.2375	0.2299	0.2739	0.2778	0.2644	0.2759	0.2567	0.2969	0.3295	0.2644	0.2893	0.3314	0.2835	0.2663	0.228	0.2107	0.1398	0.1073	0.1341	0.1245	0.1264	0.1705	0.1034
Fungi_Release38	pochonia_chlamydosporia_170	A	0.249	0.2835	0.249	0.2069	0.2375	0.272	0.2663	0.251	0.2682	0.2452	0.2471	0.2452	0.2356	0.2625	0.2529	0.251	0.2605	0.2893	0.2126	0.2299	0.2912	0.249	0.2395	0.2931	0.2701	0.2625	0.2644	0.249	0.2548	0.2739	0.251	0.3103	0.2414	0.2969	0.2912	0.2989	0.3161	0.2989	0.2701	0.2318	0.2682	0.1839	0.1973	0.2126	0.2759	0.2567	0.3621
Fungi_Release38	pochonia_chlamydosporia_170	C	0.1992	0.1992	0.2318	0.251	0.2471	0.2088	0.1858	0.2452	0.2165	0.2529	0.2471	0.251	0.2529	0.1973	0.2318	0.2835	0.2146	0.2184	0.2644	0.1916	0.1954	0.2414	0.205	0.182	0.2318	0.2433	0.1897	0.205	0.228	0.2107	0.2414	0.228	0.249	0.228	0.2184	0.2433	0.1686	0.2203	0.2126	0.1877	0.1188	0.1169	0.0958	0.092	0.0575	0.113	0.1245
Fungi_Release38	pochonia_chlamydosporia_170	G	0.249	0.2414	0.2337	0.2414	0.2337	0.2356	0.2318	0.2146	0.2337	0.2299	0.2126	0.2241	0.2241	0.2356	0.2146	0.2126	0.2107	0.2088	0.2586	0.2567	0.2107	0.2663	0.2529	0.251	0.2337	0.2165	0.2586	0.2529	0.2337	0.2088	0.2586	0.1762	0.2203	0.2069	0.1935	0.2069	0.2452	0.2318	0.2299	0.3506	0.4464	0.5421	0.5766	0.5287	0.5115	0.4444	0.3621
Fungi_Release38	pochonia_chlamydosporia_170	T	0.3027	0.2759	0.2854	0.3008	0.2816	0.2835	0.3161	0.2893	0.2816	0.272	0.2931	0.2797	0.2874	0.3046	0.3008	0.2529	0.3142	0.2835	0.2644	0.3218	0.3027	0.2433	0.3027	0.2739	0.2644	0.2778	0.2874	0.2931	0.2835	0.3065	0.249	0.2854	0.2893	0.2682	0.2969	0.251	0.2701	0.249	0.2874	0.2299	0.1667	0.1571	0.1303	0.1667	0.1552	0.1858	0.1513
Fungi_Release38	coniochaeta_ligniaria_nrrl_30616	A	0.2385	0.2365	0.1904	0.2115	0.2135	0.2154	0.2173	0.1981	0.2173	0.2365	0.1808	0.2385	0.2288	0.2096	0.2212	0.2423	0.2288	0.1923	0.1962	0.2173	0.2558	0.2769	0.2442	0.2096	0.2442	0.2404	0.2615	0.2538	0.2365	0.2538	0.2673	0.1635	0.2442	0.2635	0.2442	0.2538	0.3135	0.2423	0.2596	0.2135	0.2212	0.1981	0.1827	0.1827	0.2462	0.2654	0.3904
Fungi_Release38	coniochaeta_ligniaria_nrrl_30616	C	0.2442	0.2596	0.2442	0.3038	0.2827	0.2385	0.2904	0.2635	0.3154	0.2981	0.2635	0.2192	0.2577	0.3096	0.2192	0.2038	0.2731	0.225	0.2538	0.2231	0.2115	0.2346	0.1827	0.2365	0.2115	0.2231	0.2038	0.2269	0.2269	0.2115	0.225	0.2731	0.2308	0.25	0.2231	0.2192	0.2058	0.2538	0.2269	0.2423	0.1481	0.1212	0.1154	0.0942	0.1077	0.1346	0.1327
Fungi_Release38	coniochaeta_ligniaria_nrrl_30616	G	0.2558	0.2673	0.2808	0.2538	0.2558	0.2731	0.2635	0.3058	0.2673	0.2192	0.2769	0.2846	0.2865	0.2635	0.3077	0.2885	0.2885	0.3288	0.3077	0.3269	0.3288	0.2654	0.3308	0.3308	0.3577	0.3327	0.2904	0.2692	0.3365	0.2808	0.2654	0.3077	0.2712	0.2519	0.2731	0.2923	0.2327	0.2981	0.3346	0.3673	0.5173	0.5673	0.6096	0.5788	0.5462	0.4442	0.4058
Fungi_Release38	coniochaeta_ligniaria_nrrl_30616	T	0.2615	0.2365	0.2846	0.2308	0.2481	0.2731	0.2288	0.2327	0.2	0.2462	0.2788	0.2577	0.2269	0.2173	0.2519	0.2654	0.2096	0.2538	0.2423	0.2327	0.2038	0.2231	0.2423	0.2231	0.1865	0.2038	0.2442	0.25	0.2	0.2538	0.2423	0.2558	0.2538	0.2346	0.2596	0.2346	0.2481	0.2058	0.1788	0.1769	0.1135	0.1135	0.0923	0.1442	0.1	0.1558	0.0712
Fungi_Release38	coccidioides_immitis_h538_4	A	0.2239	0.2201	0.2278	0.2664	0.2568	0.2297	0.2548	0.2317	0.2317	0.2394	0.2066	0.2239	0.2432	0.2606	0.2278	0.2529	0.2143	0.2645	0.2355	0.2471	0.251	0.2587	0.2529	0.3031	0.2606	0.278	0.2876	0.2606	0.2432	0.251	0.2548	0.2452	0.2606	0.2741	0.2336	0.2394	0.2645	0.2857	0.2317	0.1795	0.2336	0.2085	0.2027	0.2259	0.2471	0.2876	0.4093
Fungi_Release38	coccidioides_immitis_h538_4	C	0.2568	0.2085	0.2394	0.2375	0.2568	0.2548	0.2413	0.2317	0.2413	0.2259	0.2413	0.251	0.2799	0.2452	0.2625	0.2317	0.2336	0.1911	0.2027	0.2375	0.2452	0.2336	0.2394	0.1988	0.2066	0.2143	0.2162	0.2375	0.2413	0.2259	0.2008	0.195	0.2046	0.1969	0.2432	0.2587	0.2239	0.1931	0.2355	0.1969	0.1158	0.0792	0.0869	0.0946	0.1216	0.1158	0.11
Fungi_Release38	coccidioides_immitis_h538_4	G	0.251	0.2838	0.2355	0.2394	0.2124	0.222	0.2394	0.2413	0.2317	0.2201	0.2452	0.2683	0.2124	0.2239	0.2432	0.2143	0.2548	0.2471	0.251	0.2761	0.2394	0.2239	0.2317	0.2452	0.249	0.1931	0.2143	0.1873	0.2181	0.2008	0.2471	0.2413	0.2317	0.222	0.2317	0.2201	0.2297	0.249	0.2819	0.3687	0.4961	0.5946	0.6081	0.5328	0.4884	0.3784	0.3591
Fungi_Release38	coccidioides_immitis_h538_4	T	0.2683	0.2876	0.2973	0.2568	0.2741	0.2934	0.2645	0.2954	0.2954	0.3147	0.3069	0.2568	0.2645	0.2703	0.2664	0.3012	0.2973	0.2973	0.3108	0.2394	0.2645	0.2838	0.2761	0.2529	0.2838	0.3147	0.2819	0.3147	0.2973	0.3224	0.2973	0.3185	0.3031	0.3069	0.2915	0.2819	0.2819	0.2722	0.251	0.2548	0.1544	0.1178	0.1023	0.1467	0.1429	0.2181	0.1216
Fungi_Release38	kwoniella_heveanensis_bcc8398	A	0.249	0.2335	0.2062	0.2179	0.2023	0.2296	0.2354	0.2412	0.2257	0.2335	0.2179	0.2354	0.2529	0.2432	0.2626	0.2296	0.2704	0.2685	0.2451	0.2607	0.2393	0.2471	0.2315	0.2315	0.2607	0.2646	0.2043	0.2257	0.249	0.216	0.2315	0.1965	0.2257	0.177	0.2218	0.1984	0.1907	0.1907	0.1712	0.1362	0.177	0.1887	0.1693	0.2043	0.2354	0.2451	0.4436
Fungi_Release38	kwoniella_heveanensis_bcc8398	C	0.2412	0.2315	0.2802	0.2821	0.2646	0.2276	0.2374	0.2724	0.2724	0.216	0.2296	0.2354	0.214	0.2296	0.2237	0.2296	0.2588	0.2101	0.2354	0.2257	0.2335	0.251	0.2374	0.2393	0.249	0.2432	0.2354	0.2471	0.2549	0.2023	0.2393	0.251	0.2218	0.2685	0.2588	0.216	0.2218	0.2082	0.1965	0.2198	0.1226	0.1012	0.0914	0.1284	0.1109	0.1576	0.072
Fungi_Release38	kwoniella_heveanensis_bcc8398	G	0.2198	0.2743	0.2335	0.2198	0.2626	0.2821	0.2315	0.249	0.2665	0.2646	0.286	0.2743	0.2724	0.2588	0.2704	0.2899	0.2412	0.2918	0.2549	0.2724	0.2665	0.2607	0.2626	0.2704	0.2198	0.251	0.2743	0.2529	0.2218	0.2704	0.2374	0.2665	0.2237	0.286	0.2276	0.2685	0.284	0.2879	0.3307	0.3677	0.5467	0.5661	0.6031	0.5175	0.537	0.393	0.4008
Fungi_Release38	kwoniella_heveanensis_bcc8398	T	0.2899	0.2607	0.2802	0.2802	0.2704	0.2607	0.2957	0.2374	0.2354	0.286	0.2665	0.2549	0.2607	0.2685	0.2432	0.251	0.2296	0.2296	0.2646	0.2412	0.2607	0.2412	0.2685	0.2588	0.2704	0.2412	0.286	0.2743	0.2743	0.3113	0.2918	0.286	0.3288	0.2685	0.2918	0.3171	0.3035	0.3132	0.3016	0.2763	0.1537	0.144	0.1362	0.1498	0.1167	0.2043	0.0837
Fungi_Release38	magnaporthe_poae	A	0.2207	0.2168	0.2148	0.207	0.2246	0.207	0.2109	0.2129	0.2148	0.2363	0.2461	0.209	0.252	0.2422	0.248	0.2227	0.2344	0.2305	0.2578	0.2383	0.2773	0.2285	0.2559	0.2285	0.2402	0.2559	0.25	0.2422	0.25	0.2617	0.2578	0.2324	0.2461	0.2324	0.2246	0.1895	0.209	0.1758	0.1895	0.1582	0.2109	0.1758	0.2051	0.2266	0.2461	0.3105	0.4707
Fungi_Release38	magnaporthe_poae	C	0.293	0.3125	0.3047	0.2578	0.2891	0.2832	0.2734	0.293	0.2402	0.252	0.2852	0.3066	0.2637	0.2695	0.2852	0.2695	0.2539	0.293	0.2656	0.2773	0.2344	0.2773	0.2324	0.2773	0.2617	0.2695	0.2578	0.2793	0.3066	0.2559	0.252	0.2598	0.2871	0.2891	0.3125	0.2676	0.2383	0.3086	0.248	0.2363	0.1426	0.1504	0.1211	0.1309	0.1523	0.1582	0.1367
Fungi_Release38	magnaporthe_poae	G	0.2734	0.2754	0.2441	0.2656	0.2402	0.2773	0.252	0.2461	0.2949	0.2773	0.2324	0.2441	0.2461	0.2578	0.2285	0.2598	0.2715	0.2461	0.2891	0.2793	0.252	0.2676	0.2695	0.2461	0.2715	0.2676	0.2734	0.2129	0.2461	0.2285	0.2422	0.2598	0.2539	0.25	0.2031	0.2715	0.291	0.334	0.3203	0.3711	0.5527	0.5723	0.5664	0.5332	0.5117	0.3887	0.3398
Fungi_Release38	magnaporthe_poae	T	0.2129	0.1953	0.2363	0.2695	0.2461	0.2324	0.2637	0.248	0.25	0.2344	0.2363	0.2402	0.2383	0.2305	0.2383	0.248	0.2402	0.2305	0.1875	0.2051	0.2363	0.2266	0.2422	0.248	0.2266	0.207	0.2188	0.2656	0.1973	0.2539	0.248	0.248	0.2129	0.2285	0.2598	0.2715	0.2617	0.1816	0.2422	0.2344	0.0938	0.1016	0.1074	0.1094	0.0898	0.1426	0.0527
Fungi_Release38	stachybotrys_chartarum_ibt_40288	A	0.2294	0.1961	0.2176	0.1902	0.2137	0.1667	0.2275	0.2235	0.2431	0.2098	0.2275	0.2314	0.2157	0.2176	0.2118	0.202	0.2137	0.2235	0.1882	0.2039	0.2078	0.2196	0.2294	0.2647	0.2098	0.2627	0.251	0.2392	0.2412	0.2353	0.2392	0.2314	0.2216	0.2373	0.2157	0.2333	0.2667	0.3412	0.3059	0.2294	0.249	0.1725	0.151	0.1588	0.2078	0.2529	0.449
Fungi_Release38	stachybotrys_chartarum_ibt_40288	C	0.2804	0.2941	0.2745	0.2745	0.2745	0.2882	0.2961	0.2725	0.2804	0.3157	0.2922	0.2784	0.2784	0.251	0.2314	0.2804	0.2529	0.2549	0.2725	0.249	0.2667	0.2451	0.2216	0.2137	0.2039	0.2294	0.2314	0.2549	0.2627	0.2412	0.2157	0.2294	0.2275	0.2471	0.2569	0.2569	0.2059	0.2098	0.2529	0.2529	0.1451	0.1314	0.0804	0.0843	0.1118	0.149	0.0765
Fungi_Release38	stachybotrys_chartarum_ibt_40288	G	0.249	0.2647	0.2451	0.2549	0.2608	0.2686	0.2373	0.2451	0.2255	0.2353	0.2569	0.2431	0.2412	0.2608	0.249	0.2549	0.2745	0.2686	0.2804	0.2706	0.2725	0.2863	0.2784	0.2784	0.2922	0.3	0.2745	0.2863	0.2706	0.2745	0.2667	0.2765	0.2627	0.2412	0.2412	0.2137	0.2431	0.2647	0.2333	0.2863	0.4804	0.5824	0.6706	0.6235	0.5686	0.3765	0.4118
Fungi_Release38	stachybotrys_chartarum_ibt_40288	T	0.2412	0.2451	0.2627	0.2804	0.251	0.2765	0.2392	0.2588	0.251	0.2392	0.2235	0.2471	0.2647	0.2706	0.3078	0.2627	0.2588	0.2529	0.2588	0.2765	0.2529	0.249	0.2706	0.2431	0.2941	0.2078	0.2431	0.2196	0.2255	0.249	0.2784	0.2627	0.2882	0.2745	0.2863	0.2961	0.2843	0.1843	0.2078	0.2314	0.1255	0.1137	0.098	0.1333	0.1118	0.2216	0.0627
Fungi_Release38	cladophialophora_psammophila_cbs_110553	A	0.2406	0.2544	0.2249	0.2268	0.215	0.2327	0.2347	0.2544	0.2505	0.2485	0.2406	0.2367	0.2584	0.2465	0.2465	0.2327	0.2387	0.2643	0.2308	0.2584	0.2544	0.2564	0.2761	0.2821	0.2367	0.2189	0.2682	0.2544	0.2919	0.2584	0.2899	0.2367	0.2781	0.2209	0.2426	0.2525	0.2781	0.3195	0.2643	0.2032	0.217	0.1913	0.1834	0.2012	0.2485	0.3176	0.4615
Fungi_Release38	cladophialophora_psammophila_cbs_110553	C	0.211	0.2229	0.2327	0.2722	0.2544	0.2781	0.2604	0.2327	0.2781	0.2959	0.2663	0.2899	0.2426	0.2821	0.2702	0.2584	0.2288	0.2308	0.2465	0.2426	0.2091	0.213	0.2268	0.2584	0.2485	0.284	0.2327	0.215	0.2308	0.2663	0.2229	0.2367	0.2367	0.2525	0.2505	0.2268	0.2209	0.213	0.1913	0.2367	0.1558	0.1085	0.1045	0.1085	0.1144	0.1243	0.1164
Fungi_Release38	cladophialophora_psammophila_cbs_110553	G	0.286	0.2564	0.2742	0.2288	0.2406	0.2623	0.2012	0.2308	0.2327	0.1972	0.2465	0.2308	0.2229	0.213	0.2446	0.2288	0.2604	0.2485	0.2544	0.2564	0.288	0.2249	0.2426	0.2189	0.2485	0.2663	0.2544	0.2801	0.2426	0.2544	0.2308	0.2249	0.213	0.2446	0.2288	0.217	0.2406	0.2367	0.2998	0.3609	0.4832	0.5661	0.6213	0.568	0.5404	0.4103	0.3412
Fungi_Release38	cladophialophora_psammophila_cbs_110553	T	0.2623	0.2663	0.2682	0.2722	0.2899	0.2268	0.3037	0.2821	0.2387	0.2584	0.2465	0.2426	0.2761	0.2584	0.2387	0.2801	0.2722	0.2564	0.2682	0.2426	0.2485	0.3057	0.2544	0.2406	0.2663	0.2308	0.2446	0.2505	0.2347	0.2209	0.2564	0.3018	0.2722	0.2821	0.2781	0.3037	0.2604	0.2308	0.2446	0.1992	0.144	0.1341	0.0907	0.1223	0.0966	0.1479	0.0809
Fungi_Release38	microdochium_bolleyi	A	0.2505	0.2268	0.2249	0.2229	0.1893	0.2465	0.2209	0.211	0.2327	0.217	0.217	0.2367	0.215	0.2091	0.3018	0.3136	0.2722	0.2702	0.2781	0.2387	0.2525	0.2189	0.2919	0.2643	0.2899	0.2801	0.2663	0.2406	0.2623	0.2288	0.2584	0.2505	0.2347	0.2288	0.211	0.2249	0.2742	0.2032	0.2288	0.211	0.1834	0.1992	0.1953	0.1933	0.2308	0.3018	0.4497
Fungi_Release38	microdochium_bolleyi	C	0.2959	0.3136	0.2702	0.3136	0.2801	0.2939	0.2801	0.286	0.2742	0.2899	0.2821	0.288	0.2643	0.2781	0.2406	0.2347	0.2722	0.2446	0.2308	0.2781	0.2623	0.2939	0.2643	0.2564	0.2761	0.2426	0.2564	0.2781	0.2604	0.2682	0.2604	0.2643	0.2801	0.286	0.2899	0.2604	0.2268	0.2623	0.2821	0.2406	0.2032	0.146	0.1282	0.1499	0.1341	0.142	0.1223
Fungi_Release38	microdochium_bolleyi	G	0.2426	0.2367	0.2564	0.2288	0.2899	0.2564	0.217	0.2821	0.2663	0.2426	0.2347	0.2426	0.2663	0.2623	0.2742	0.2406	0.2525	0.2682	0.2387	0.2406	0.2584	0.2702	0.2465	0.2781	0.2465	0.2584	0.2525	0.2268	0.2663	0.2682	0.2406	0.2387	0.2525	0.2465	0.213	0.2505	0.2465	0.286	0.2899	0.3471	0.4655	0.5483	0.5996	0.568	0.5483	0.4201	0.3866
Fungi_Release38	microdochium_bolleyi	T	0.211	0.2229	0.2485	0.2347	0.2406	0.2032	0.2821	0.2209	0.2268	0.2505	0.2663	0.2327	0.2544	0.2505	0.1834	0.211	0.2032	0.217	0.2525	0.2426	0.2268	0.217	0.1972	0.2012	0.1874	0.2189	0.2249	0.2544	0.211	0.2347	0.2406	0.2465	0.2327	0.2387	0.286	0.2643	0.2525	0.2485	0.1992	0.2012	0.1479	0.1065	0.0769	0.0888	0.0868	0.1361	0.0414
Fungi_Release38	cladophialophora_immunda	A	0.2253	0.2253	0.2411	0.2312	0.2352	0.2332	0.2253	0.1996	0.247	0.2095	0.2253	0.2273	0.2174	0.2431	0.2213	0.2352	0.2727	0.2391	0.2194	0.2826	0.2708	0.2708	0.2767	0.2628	0.2194	0.247	0.2905	0.2569	0.2154	0.2609	0.2194	0.2431	0.251	0.2233	0.2411	0.2233	0.2708	0.2925	0.2866	0.1917	0.2253	0.1601	0.1976	0.2134	0.247	0.336	0.4486
Fungi_Release38	cladophialophora_immunda	C	0.2411	0.253	0.2688	0.2628	0.2609	0.2826	0.2727	0.3202	0.2866	0.2846	0.3004	0.3103	0.2589	0.2589	0.2866	0.3142	0.2589	0.2451	0.251	0.2273	0.2213	0.2194	0.2055	0.2549	0.2549	0.251	0.2253	0.2253	0.253	0.251	0.2273	0.2253	0.2233	0.2332	0.2332	0.2688	0.1877	0.2253	0.2292	0.2253	0.1403	0.1225	0.0889	0.0929	0.1206	0.0988	0.1403
Fungi_Release38	cladophialophora_immunda	G	0.2549	0.2846	0.253	0.2648	0.2391	0.2273	0.2194	0.2075	0.2431	0.2411	0.2233	0.2016	0.2431	0.2134	0.2332	0.2194	0.2115	0.2372	0.2431	0.253	0.2688	0.2609	0.253	0.2668	0.2727	0.2846	0.247	0.2589	0.2648	0.2569	0.2688	0.2569	0.2391	0.2431	0.2253	0.1996	0.2332	0.2609	0.2391	0.3735	0.5178	0.5929	0.6186	0.5316	0.5296	0.3913	0.3261
Fungi_Release38	cladophialophora_immunda	T	0.2787	0.2372	0.2372	0.2411	0.2648	0.2569	0.2826	0.2727	0.2233	0.2648	0.251	0.2609	0.2806	0.2846	0.2589	0.2312	0.2569	0.2787	0.2866	0.2372	0.2391	0.249	0.2648	0.2154	0.253	0.2174	0.2372	0.2589	0.2668	0.2312	0.2846	0.2747	0.2866	0.3004	0.3004	0.3083	0.3083	0.2213	0.2451	0.2095	0.1166	0.1245	0.0949	0.1621	0.1028	0.1739	0.085
Fungi_Release38	stachybotrys_chartarum_ibt_7711	A	0.2233	0.1976	0.2154	0.1877	0.2253	0.164	0.2154	0.2095	0.2352	0.2134	0.2312	0.2233	0.2036	0.2312	0.2075	0.1957	0.2095	0.2174	0.1719	0.1976	0.2174	0.2134	0.2174	0.2589	0.2115	0.2708	0.2569	0.2332	0.253	0.2391	0.2292	0.2273	0.2292	0.2391	0.2589	0.2372	0.2846	0.3498	0.3004	0.2154	0.253	0.1581	0.1443	0.1482	0.2134	0.2451	0.4466
Fungi_Release38	stachybotrys_chartarum_ibt_7711	C	0.2826	0.2945	0.2806	0.2925	0.2727	0.3261	0.2787	0.2708	0.2984	0.3103	0.2885	0.2806	0.2826	0.2411	0.2312	0.2806	0.2628	0.249	0.2589	0.2411	0.251	0.2451	0.2194	0.1996	0.2075	0.2312	0.2352	0.2352	0.249	0.247	0.1937	0.2233	0.2352	0.2431	0.253	0.2688	0.1917	0.2154	0.2549	0.2609	0.1403	0.1344	0.0751	0.1008	0.1028	0.1462	0.0791
Fungi_Release38	stachybotrys_chartarum_ibt_7711	G	0.253	0.2549	0.2431	0.249	0.2549	0.251	0.2549	0.249	0.2194	0.2411	0.2451	0.2451	0.2589	0.2609	0.249	0.2549	0.2648	0.2609	0.2925	0.2767	0.2787	0.2885	0.3063	0.2925	0.2905	0.2964	0.2589	0.2984	0.249	0.2628	0.2846	0.2945	0.2411	0.253	0.2174	0.1937	0.2451	0.253	0.2134	0.2945	0.4723	0.5929	0.6838	0.6166	0.5692	0.3834	0.415
Fungi_Release38	stachybotrys_chartarum_ibt_7711	T	0.2411	0.253	0.2609	0.2708	0.247	0.2589	0.251	0.2708	0.247	0.2352	0.2352	0.251	0.2549	0.2668	0.3123	0.2688	0.2628	0.2727	0.2767	0.2846	0.253	0.253	0.2569	0.249	0.2905	0.2016	0.249	0.2332	0.249	0.251	0.2925	0.2549	0.2945	0.2648	0.2708	0.3004	0.2787	0.1818	0.2312	0.2292	0.1344	0.1146	0.0968	0.1344	0.1146	0.2253	0.0593
Fungi_Release38	aspergillus_nidulans	A	0.2099	0.198	0.2198	0.2416	0.2356	0.2436	0.2059	0.2277	0.2158	0.2198	0.2218	0.2515	0.2733	0.2317	0.2376	0.2238	0.2832	0.2614	0.2495	0.297	0.2614	0.2554	0.2376	0.2554	0.2752	0.2634	0.2733	0.2851	0.2832	0.2455	0.2812	0.2931	0.2653	0.297	0.301	0.2871	0.2713	0.2911	0.3069	0.2356	0.295	0.1762	0.1861	0.2119	0.1881	0.2713	0.4376
Fungi_Release38	aspergillus_nidulans	C	0.2436	0.2515	0.2554	0.2554	0.2535	0.2574	0.2713	0.2178	0.2455	0.2851	0.2713	0.2376	0.2574	0.2257	0.2693	0.2455	0.2475	0.2416	0.2495	0.2317	0.2079	0.2337	0.2198	0.2178	0.2099	0.2059	0.1921	0.2059	0.2495	0.2416	0.2119	0.2139	0.2158	0.2277	0.2158	0.2178	0.2297	0.2337	0.1743	0.1941	0.103	0.1347	0.1089	0.099	0.095	0.0832	0.101
Fungi_Release38	aspergillus_nidulans	G	0.2614	0.2832	0.2079	0.2475	0.2198	0.2396	0.204	0.2317	0.196	0.1604	0.1861	0.1782	0.2158	0.2455	0.2059	0.2238	0.2059	0.2396	0.2416	0.2099	0.2475	0.2416	0.2653	0.2792	0.2396	0.2634	0.2356	0.2416	0.2436	0.2277	0.2158	0.2079	0.202	0.1941	0.198	0.1743	0.2238	0.2317	0.2317	0.3168	0.4356	0.5208	0.5802	0.5465	0.5663	0.4376	0.3901
Fungi_Release38	aspergillus_nidulans	T	0.2851	0.2673	0.3168	0.2554	0.2911	0.2594	0.3188	0.3228	0.3426	0.3347	0.3208	0.3327	0.2535	0.297	0.2871	0.3069	0.2634	0.2574	0.2594	0.2614	0.2832	0.2693	0.2772	0.2475	0.2752	0.2673	0.299	0.2673	0.2238	0.2851	0.2911	0.2851	0.3168	0.2812	0.2851	0.3208	0.2752	0.2436	0.2871	0.2535	0.1663	0.1683	0.1248	0.1426	0.1505	0.2079	0.0713
Fungi_Release38	purpureocillium_lilacinum	A	0.2099	0.2099	0.1901	0.2119	0.2	0.204	0.2059	0.1901	0.2059	0.2257	0.2198	0.2139	0.2574	0.204	0.2158	0.2139	0.2277	0.2178	0.2257	0.2218	0.2238	0.2198	0.202	0.2337	0.2198	0.2396	0.2238	0.2535	0.2139	0.2158	0.198	0.2356	0.2515	0.2356	0.2455	0.2277	0.2495	0.2396	0.2911	0.2139	0.2416	0.2	0.1762	0.1525	0.2178	0.2475	0.3782
Fungi_Release38	purpureocillium_lilacinum	C	0.2634	0.2455	0.2931	0.2752	0.2812	0.3149	0.3129	0.299	0.301	0.2653	0.2792	0.3208	0.2931	0.2436	0.2554	0.2931	0.2653	0.2851	0.2653	0.2436	0.2733	0.2495	0.2257	0.2436	0.2257	0.2297	0.2752	0.2396	0.2139	0.2535	0.2653	0.2653	0.2218	0.2792	0.2653	0.2931	0.2198	0.2554	0.2376	0.2733	0.1624	0.1584	0.103	0.1545	0.1287	0.1505	0.1208
Fungi_Release38	purpureocillium_lilacinum	G	0.301	0.2891	0.2455	0.299	0.2772	0.2455	0.2653	0.2792	0.2535	0.2832	0.2871	0.2515	0.2297	0.2752	0.295	0.2634	0.2752	0.2911	0.2673	0.2911	0.297	0.2832	0.3386	0.299	0.3228	0.3089	0.297	0.2832	0.3347	0.2891	0.3228	0.2931	0.2554	0.2515	0.2634	0.2356	0.2713	0.305	0.2653	0.3208	0.4832	0.5287	0.6277	0.5782	0.5465	0.4436	0.4475
Fungi_Release38	purpureocillium_lilacinum	T	0.2257	0.2554	0.2713	0.2139	0.2416	0.2356	0.2158	0.2317	0.2396	0.2257	0.2139	0.2139	0.2198	0.2772	0.2337	0.2297	0.2317	0.2059	0.2416	0.2436	0.2059	0.2475	0.2337	0.2238	0.2317	0.2218	0.204	0.2238	0.2376	0.2416	0.2139	0.2059	0.2713	0.2337	0.2257	0.2436	0.2594	0.2	0.2059	0.1921	0.1129	0.1129	0.0931	0.1149	0.1069	0.1584	0.0535
Fungi_Release38	aspergillus_versicolor_cbs_583_65	A	0.2401	0.2401	0.2321	0.2024	0.2302	0.25	0.2302	0.254	0.2202	0.2599	0.2321	0.2242	0.248	0.2302	0.2282	0.2202	0.2004	0.2083	0.2302	0.246	0.2798	0.248	0.2659	0.2599	0.2679	0.2698	0.2738	0.2738	0.2897	0.256	0.3313	0.25	0.3036	0.2917	0.2817	0.246	0.2639	0.3115	0.2778	0.2619	0.3274	0.2262	0.1567	0.1806	0.2024	0.2163	0.4663
Fungi_Release38	aspergillus_versicolor_cbs_583_65	C	0.2341	0.2004	0.2262	0.248	0.2242	0.254	0.2401	0.2302	0.2599	0.252	0.2619	0.256	0.25	0.2679	0.2718	0.2758	0.2679	0.2798	0.2421	0.1925	0.2242	0.1964	0.2103	0.1944	0.1865	0.1885	0.2083	0.2024	0.1845	0.2401	0.2143	0.1905	0.1905	0.2302	0.2242	0.2222	0.1905	0.2282	0.2341	0.1786	0.1171	0.1627	0.1548	0.0893	0.0536	0.0615	0.0734
Fungi_Release38	aspergillus_versicolor_cbs_583_65	G	0.2421	0.25	0.2341	0.2599	0.2024	0.2242	0.1825	0.2222	0.2143	0.1706	0.1964	0.2083	0.1984	0.1925	0.2123	0.1865	0.1865	0.2163	0.2123	0.256	0.1964	0.2401	0.2183	0.2202	0.2381	0.254	0.252	0.2401	0.2341	0.244	0.1905	0.2242	0.2024	0.1845	0.2004	0.2242	0.2817	0.2063	0.2063	0.2738	0.4286	0.4643	0.5417	0.5734	0.625	0.4683	0.3889
Fungi_Release38	aspergillus_versicolor_cbs_583_65	T	0.2837	0.3095	0.3075	0.2897	0.3433	0.2718	0.3472	0.2937	0.3056	0.3175	0.3095	0.3115	0.3036	0.3095	0.2877	0.3175	0.3452	0.2956	0.3155	0.3056	0.2996	0.3155	0.3056	0.3254	0.3075	0.2877	0.2659	0.2837	0.2917	0.2599	0.2639	0.3353	0.3036	0.2937	0.2937	0.3075	0.2639	0.254	0.2817	0.2857	0.127	0.1468	0.1468	0.1567	0.119	0.254	0.0714
Fungi_Release38	histoplasma_capsulatum_nam1	A	0.2505	0.2604	0.2704	0.2525	0.2565	0.2545	0.2505	0.3002	0.3042	0.2744	0.2803	0.2704	0.2803	0.2903	0.3082	0.2664	0.2823	0.3022	0.2763	0.3022	0.2624	0.2783	0.2942	0.3121	0.2525	0.2823	0.2903	0.2922	0.2584	0.2584	0.2903	0.2843	0.2724	0.2465	0.2485	0.2465	0.2843	0.2306	0.2445	0.1829	0.2346	0.1988	0.2525	0.3062	0.3658	0.3101	0.4811
Fungi_Release38	histoplasma_capsulatum_nam1	C	0.2247	0.2247	0.2127	0.1968	0.1511	0.2068	0.2485	0.2008	0.1809	0.1889	0.2127	0.2028	0.2386	0.1849	0.2406	0.2505	0.2008	0.2087	0.2147	0.2008	0.2187	0.2107	0.161	0.1849	0.2286	0.2068	0.1829	0.2525	0.1769	0.2167	0.2545	0.2445	0.2048	0.175	0.2227	0.1769	0.175	0.173	0.175	0.1571	0.0954	0.0974	0.0994	0.0934	0.0775	0.1153	0.0815
Fungi_Release38	histoplasma_capsulatum_nam1	G	0.2505	0.2525	0.2445	0.2346	0.2664	0.2684	0.2286	0.2346	0.1968	0.2266	0.2147	0.2286	0.2247	0.2187	0.1769	0.2048	0.1928	0.2247	0.2346	0.2227	0.2227	0.2346	0.2366	0.2207	0.2346	0.1889	0.2604	0.1928	0.2286	0.1988	0.1769	0.173	0.2565	0.2584	0.2386	0.2763	0.2843	0.326	0.3201	0.4095	0.5507	0.5746	0.5229	0.4215	0.4274	0.34	0.3201
Fungi_Release38	histoplasma_capsulatum_nam1	T	0.2744	0.2624	0.2724	0.3161	0.326	0.2704	0.2724	0.2644	0.3181	0.3101	0.2922	0.2982	0.2565	0.3062	0.2744	0.2783	0.3241	0.2644	0.2744	0.2744	0.2962	0.2763	0.3082	0.2823	0.2843	0.3221	0.2664	0.2624	0.336	0.326	0.2783	0.2982	0.2664	0.3201	0.2903	0.3002	0.2565	0.2704	0.2604	0.2505	0.1193	0.1292	0.1252	0.1789	0.1292	0.2346	0.1173
Fungi_Release38	microbotryum_violaceum	A	0.2306	0.2008	0.2286	0.2386	0.2266	0.2525	0.2107	0.1988	0.2406	0.2227	0.2028	0.2247	0.2227	0.2326	0.2425	0.2207	0.2465	0.2247	0.2207	0.2008	0.2406	0.2187	0.2028	0.1769	0.2167	0.2147	0.1829	0.159	0.175	0.1869	0.175	0.1849	0.1491	0.1312	0.1451	0.1531	0.1312	0.1153	0.1113	0.0596	0.1292	0.1312	0.1352	0.175	0.2107	0.2664	0.4672
Fungi_Release38	microbotryum_violaceum	C	0.2127	0.2445	0.2406	0.2266	0.2485	0.2425	0.2465	0.2406	0.2326	0.2087	0.2604	0.2604	0.2724	0.2406	0.2306	0.2664	0.2366	0.2803	0.2227	0.2545	0.2724	0.2664	0.2883	0.2783	0.2207	0.2326	0.2604	0.2445	0.2783	0.2247	0.2346	0.2167	0.2386	0.2684	0.2445	0.2545	0.2346	0.2247	0.2087	0.2386	0.1034	0.1252	0.0815	0.1531	0.0954	0.1909	0.0656
Fungi_Release38	microbotryum_violaceum	G	0.2942	0.2883	0.2584	0.2843	0.2803	0.2545	0.2823	0.3141	0.2883	0.2624	0.2664	0.2903	0.2823	0.2565	0.2863	0.2584	0.2604	0.2803	0.2445	0.2565	0.2028	0.2406	0.2465	0.2584	0.2485	0.2425	0.2644	0.2465	0.2465	0.2326	0.2604	0.2227	0.2684	0.2505	0.2584	0.2485	0.3002	0.3022	0.3419	0.4414	0.6441	0.5924	0.6541	0.4632	0.5885	0.3419	0.4016
Fungi_Release38	microbotryum_violaceum	T	0.2624	0.2664	0.2724	0.2505	0.2445	0.2505	0.2604	0.2465	0.2386	0.3062	0.2704	0.2247	0.2227	0.2704	0.2406	0.2545	0.2565	0.2147	0.3121	0.2883	0.2843	0.2744	0.2624	0.2863	0.3141	0.3101	0.2922	0.3499	0.3002	0.3559	0.33	0.3757	0.3439	0.3499	0.3519	0.3439	0.334	0.3579	0.338	0.2604	0.1233	0.1511	0.1292	0.2087	0.1054	0.2008	0.0656
Fungi_Release38	histoplasma_capsulatum_h143	A	0.2649	0.257	0.2769	0.2629	0.2351	0.2749	0.2769	0.251	0.249	0.2948	0.2251	0.2709	0.241	0.261	0.3048	0.253	0.2709	0.247	0.2829	0.2689	0.2908	0.2849	0.2669	0.2869	0.2948	0.3108	0.3028	0.3068	0.2869	0.3028	0.2689	0.2749	0.2689	0.2908	0.2829	0.253	0.2689	0.2351	0.2291	0.1653	0.2131	0.2092	0.2171	0.2829	0.3307	0.2908	0.4821
Fungi_Release38	histoplasma_capsulatum_h143	C	0.2191	0.2151	0.2052	0.2311	0.2211	0.2191	0.2291	0.239	0.2171	0.2072	0.2112	0.2112	0.2171	0.2311	0.1992	0.2331	0.2131	0.2092	0.249	0.1972	0.2112	0.2131	0.1952	0.1932	0.1952	0.2191	0.2012	0.1793	0.1992	0.2032	0.2151	0.2271	0.2052	0.2052	0.1873	0.1813	0.1952	0.1972	0.1972	0.1912	0.1076	0.0697	0.0697	0.0837	0.0916	0.1175	0.0777
Fungi_Release38	histoplasma_capsulatum_h143	G	0.241	0.2211	0.2211	0.2072	0.2251	0.2251	0.2151	0.1992	0.247	0.245	0.253	0.2371	0.253	0.2351	0.2112	0.1892	0.2012	0.2709	0.1833	0.239	0.2191	0.2052	0.241	0.2112	0.2112	0.1653	0.2171	0.2032	0.2351	0.2072	0.2271	0.2131	0.2211	0.1972	0.2012	0.2331	0.259	0.2669	0.3008	0.3924	0.512	0.5876	0.5817	0.4661	0.4442	0.3347	0.3526
Fungi_Release38	histoplasma_capsulatum_h143	T	0.2749	0.3068	0.2968	0.2988	0.3187	0.2809	0.2789	0.3108	0.2869	0.253	0.3108	0.2809	0.2888	0.2729	0.2849	0.3247	0.3147	0.2729	0.2849	0.2948	0.2789	0.2968	0.2968	0.3088	0.2988	0.3048	0.2789	0.3108	0.2789	0.2869	0.2888	0.2849	0.3048	0.3068	0.3287	0.3327	0.2769	0.3008	0.2729	0.251	0.1673	0.1335	0.1315	0.1673	0.1335	0.257	0.0876
Fungi_Release38	pseudogymnoascus_sp_vkm_f_4518_fw_2643_	A	0.249	0.2231	0.2311	0.2709	0.2112	0.2291	0.253	0.2151	0.1833	0.245	0.1972	0.2191	0.2112	0.2689	0.2331	0.259	0.255	0.257	0.259	0.259	0.255	0.255	0.2689	0.2669	0.2988	0.2849	0.2689	0.2709	0.2371	0.3167	0.2629	0.2251	0.2829	0.3008	0.261	0.2749	0.2988	0.3108	0.3008	0.239	0.2291	0.1833	0.1733	0.1574	0.2231	0.3028	0.4323
Fungi_Release38	pseudogymnoascus_sp_vkm_f_4518_fw_2643_	C	0.2092	0.1912	0.1912	0.2191	0.2331	0.2072	0.251	0.2371	0.241	0.2371	0.245	0.2231	0.255	0.2351	0.243	0.2092	0.1992	0.1972	0.1972	0.2012	0.2311	0.2171	0.1793	0.1773	0.1853	0.1793	0.2032	0.1733	0.1753	0.1713	0.1892	0.2191	0.1833	0.1932	0.2311	0.2271	0.1892	0.1873	0.1594	0.2052	0.1275	0.0817	0.0697	0.0797	0.0657	0.1215	0.0876
Fungi_Release38	pseudogymnoascus_sp_vkm_f_4518_fw_2643_	G	0.251	0.2928	0.2709	0.2351	0.243	0.255	0.2351	0.255	0.2669	0.2331	0.2649	0.2869	0.2311	0.2331	0.2649	0.245	0.2709	0.257	0.2649	0.2829	0.2709	0.241	0.2849	0.2769	0.251	0.2888	0.2968	0.2908	0.2988	0.2649	0.259	0.2629	0.2709	0.2271	0.2271	0.243	0.2072	0.2291	0.2669	0.3127	0.4641	0.6056	0.6096	0.6076	0.6036	0.3984	0.3745
Fungi_Release38	pseudogymnoascus_sp_vkm_f_4518_fw_2643_	T	0.2908	0.2928	0.3068	0.2749	0.3127	0.3088	0.261	0.2928	0.3088	0.2849	0.2928	0.2709	0.3028	0.2629	0.259	0.2869	0.2749	0.2888	0.2789	0.257	0.243	0.2869	0.2669	0.2789	0.2649	0.247	0.2311	0.2649	0.2888	0.247	0.2888	0.2928	0.2629	0.2789	0.2809	0.255	0.3048	0.2729	0.2729	0.243	0.1793	0.1295	0.1474	0.1554	0.1076	0.1773	0.1056
Fungi_Release38	fonsecaea_monophora	A	0.2415	0.2555	0.2475	0.2196	0.2395	0.2176	0.2076	0.2136	0.2255	0.2216	0.1876	0.2236	0.2216	0.2096	0.2355	0.2874	0.2575	0.2395	0.2695	0.2515	0.2715	0.2495	0.2555	0.2595	0.2535	0.2914	0.2774	0.2974	0.2615	0.2874	0.2754	0.2355	0.2435	0.2535	0.2216	0.2395	0.2515	0.2615	0.2894	0.1976	0.1856	0.1737	0.1717	0.2355	0.2715	0.3174	0.503
Fungi_Release38	fonsecaea_monophora	C	0.2595	0.2575	0.2475	0.2535	0.2435	0.2675	0.2575	0.2255	0.2854	0.2735	0.2655	0.2655	0.2974	0.2475	0.2854	0.2475	0.2595	0.2575	0.2415	0.2096	0.2375	0.2395	0.2016	0.2056	0.2355	0.2395	0.2595	0.2415	0.2595	0.2475	0.2295	0.2595	0.2515	0.2355	0.2695	0.2455	0.2415	0.1996	0.1956	0.2275	0.1537	0.1078	0.0898	0.0918	0.1018	0.1038	0.0958
Fungi_Release38	fonsecaea_monophora	G	0.2615	0.2295	0.2176	0.2595	0.2575	0.2395	0.2275	0.2535	0.2076	0.1956	0.2754	0.2116	0.2395	0.2794	0.2455	0.2176	0.2196	0.2415	0.2176	0.2515	0.2555	0.2615	0.2735	0.2715	0.2255	0.2655	0.2116	0.2096	0.2455	0.2255	0.2196	0.2116	0.2216	0.2156	0.2116	0.2136	0.2176	0.2455	0.3014	0.3553	0.515	0.5868	0.6407	0.5389	0.505	0.3633	0.3293
Fungi_Release38	fonsecaea_monophora	T	0.2375	0.2575	0.2874	0.2675	0.2595	0.2754	0.3074	0.3074	0.2814	0.3094	0.2715	0.2994	0.2415	0.2635	0.2335	0.2475	0.2635	0.2615	0.2715	0.2874	0.2355	0.2495	0.2695	0.2635	0.2854	0.2036	0.2515	0.2515	0.2335	0.2395	0.2754	0.2934	0.2834	0.2954	0.2974	0.3014	0.2894	0.2934	0.2136	0.2196	0.1457	0.1317	0.0978	0.1337	0.1218	0.2156	0.0719
Fungi_Release38	pseudogymnoascus_sp_24mn13	A	0.2196	0.2136	0.2116	0.2335	0.1717	0.2056	0.1916	0.1996	0.2176	0.2455	0.1737	0.2136	0.2275	0.2216	0.2236	0.2555	0.2236	0.2395	0.2774	0.2216	0.2415	0.2575	0.1896	0.2156	0.2954	0.2315	0.2355	0.2635	0.2295	0.2415	0.2834	0.2375	0.2675	0.2695	0.1976	0.2355	0.2575	0.2615	0.2914	0.2395	0.2275	0.2116	0.1597	0.1756	0.2156	0.2615	0.3673
Fungi_Release38	pseudogymnoascus_sp_24mn13	C	0.2375	0.2455	0.2116	0.2255	0.2475	0.2236	0.2315	0.2455	0.2255	0.2475	0.2735	0.2655	0.2375	0.2495	0.2335	0.2056	0.2275	0.2136	0.1896	0.2255	0.2355	0.2176	0.2335	0.2076	0.1836	0.2236	0.2036	0.2355	0.2236	0.2435	0.1836	0.2156	0.1876	0.2275	0.2555	0.2555	0.2096	0.1697	0.1996	0.2156	0.1537	0.0878	0.1118	0.1138	0.0998	0.1297	0.1317
Fungi_Release38	pseudogymnoascus_sp_24mn13	G	0.3054	0.3034	0.3154	0.2695	0.3313	0.2834	0.2954	0.3094	0.3034	0.2515	0.3114	0.2735	0.2735	0.2794	0.2954	0.2814	0.3054	0.2954	0.2834	0.3253	0.2495	0.2695	0.3114	0.3453	0.2874	0.3154	0.3453	0.2655	0.2894	0.2874	0.2555	0.2974	0.3154	0.2894	0.3054	0.2655	0.2375	0.3273	0.2854	0.3074	0.481	0.6048	0.6028	0.5609	0.5469	0.4431	0.4092
Fungi_Release38	pseudogymnoascus_sp_24mn13	T	0.2375	0.2375	0.2615	0.2715	0.2495	0.2874	0.2814	0.2455	0.2535	0.2555	0.2415	0.2475	0.2615	0.2495	0.2475	0.2575	0.2435	0.2515	0.2495	0.2275	0.2735	0.2555	0.2655	0.2315	0.2335	0.2295	0.2156	0.2355	0.2575	0.2275	0.2774	0.2495	0.2295	0.2136	0.2415	0.2435	0.2954	0.2415	0.2236	0.2375	0.1377	0.0958	0.1257	0.1497	0.1377	0.1657	0.0918
Fungi_Release38	stachybotrys_chartarum_ibt_40293	A	0.2315	0.1936	0.2096	0.1936	0.2176	0.1597	0.2156	0.2176	0.2415	0.2355	0.2335	0.2255	0.2136	0.2275	0.2156	0.1956	0.2156	0.2255	0.1916	0.2036	0.2216	0.2176	0.2136	0.2575	0.2236	0.2695	0.2575	0.2515	0.2395	0.2335	0.2375	0.2335	0.2355	0.2395	0.2435	0.2435	0.2794	0.3513	0.2914	0.2136	0.2455	0.1477	0.1377	0.1497	0.2176	0.2535	0.4411
Fungi_Release38	stachybotrys_chartarum_ibt_40293	C	0.2854	0.3074	0.2854	0.2914	0.2635	0.3114	0.2794	0.2675	0.2914	0.3034	0.2934	0.2894	0.2715	0.2535	0.2435	0.2914	0.2575	0.2555	0.2575	0.2475	0.2475	0.2335	0.2236	0.2096	0.1936	0.2435	0.2275	0.2395	0.2495	0.2515	0.2096	0.2355	0.2255	0.2475	0.2555	0.2515	0.2056	0.2255	0.2555	0.2655	0.1357	0.1317	0.0818	0.0958	0.1058	0.1497	0.0878
Fungi_Release38	stachybotrys_chartarum_ibt_40293	G	0.2475	0.2595	0.2455	0.2475	0.2675	0.2635	0.2535	0.2575	0.2196	0.2315	0.2535	0.2375	0.2555	0.2515	0.2455	0.2535	0.2555	0.2635	0.2774	0.2834	0.2834	0.2974	0.3034	0.2854	0.2994	0.2974	0.2735	0.2874	0.2615	0.2695	0.2695	0.2874	0.2455	0.2415	0.2295	0.1976	0.2455	0.2475	0.2335	0.2834	0.479	0.5968	0.6886	0.6287	0.5669	0.3772	0.4112
Fungi_Release38	stachybotrys_chartarum_ibt_40293	T	0.2355	0.2395	0.2595	0.2675	0.2515	0.2655	0.2515	0.2575	0.2475	0.2295	0.2196	0.2475	0.2595	0.2675	0.2954	0.2595	0.2715	0.2555	0.2735	0.2655	0.2475	0.2515	0.2595	0.2475	0.2834	0.1896	0.2415	0.2216	0.2495	0.2455	0.2834	0.2435	0.2934	0.2715	0.2715	0.3074	0.2695	0.1756	0.2196	0.2375	0.1397	0.1238	0.0918	0.1257	0.1098	0.2196	0.0599
Fungi_Release38	arthroderma_otae_cbs_113480	A	0.2806	0.2405	0.3046	0.2285	0.2405	0.2665	0.2585	0.2846	0.2485	0.2465	0.2585	0.2525	0.2705	0.2505	0.2786	0.2164	0.3226	0.2826	0.3086	0.2866	0.2846	0.2766	0.2806	0.2886	0.3186	0.2986	0.2906	0.3086	0.3126	0.2725	0.2625	0.3086	0.2886	0.3246	0.2725	0.2585	0.2846	0.2986	0.2645	0.2104	0.2505	0.1784	0.1483	0.1924	0.2966	0.3126	0.5451
Fungi_Release38	arthroderma_otae_cbs_113480	C	0.2325	0.2345	0.2144	0.2445	0.2305	0.2224	0.2565	0.2184	0.2685	0.2144	0.2425	0.2405	0.2104	0.2305	0.2004	0.2004	0.1924	0.2004	0.1944	0.1844	0.1824	0.2004	0.1623	0.2104	0.2124	0.1703	0.1924	0.1844	0.2104	0.2044	0.2064	0.2184	0.2285	0.2164	0.2285	0.2365	0.2104	0.2024	0.2004	0.2164	0.1242	0.1102	0.0762	0.0701	0.0721	0.0721	0.0681
Fungi_Release38	arthroderma_otae_cbs_113480	G	0.2044	0.2305	0.1844	0.2004	0.2044	0.2084	0.1623	0.1844	0.1804	0.1924	0.1804	0.2204	0.2004	0.2244	0.2084	0.2485	0.1984	0.1944	0.2004	0.2144	0.2265	0.2445	0.2084	0.2305	0.1984	0.2224	0.2505	0.2104	0.1884	0.2365	0.2164	0.1964	0.1844	0.1904	0.1784	0.1964	0.2084	0.2565	0.2806	0.3206	0.479	0.5892	0.6473	0.5671	0.507	0.3487	0.2886
Fungi_Release38	arthroderma_otae_cbs_113480	T	0.2826	0.2946	0.2966	0.3267	0.3246	0.3026	0.3226	0.3126	0.3026	0.3467	0.3186	0.2866	0.3186	0.2946	0.3126	0.3347	0.2866	0.3226	0.2966	0.3146	0.3066	0.2786	0.3487	0.2705	0.2705	0.3086	0.2665	0.2966	0.2886	0.2866	0.3146	0.2766	0.2986	0.2685	0.3206	0.3086	0.2966	0.2425	0.2545	0.2525	0.1463	0.1222	0.1283	0.1703	0.1242	0.2665	0.0982
Fungi_Release38	colletotrichum_gloeosporioides_cg_14	A	0.2164	0.2585	0.2405	0.2345	0.2244	0.2124	0.2224	0.2365	0.1924	0.2405	0.2345	0.2265	0.2365	0.2445	0.2305	0.2565	0.2525	0.2204	0.2465	0.2224	0.2445	0.2685	0.2405	0.2705	0.2625	0.2465	0.2265	0.3026	0.2745	0.2665	0.2745	0.2665	0.2585	0.3046	0.2745	0.2305	0.2365	0.3647	0.3206	0.2345	0.2425	0.1764	0.1723	0.1583	0.2144	0.2665	0.4068
Fungi_Release38	colletotrichum_gloeosporioides_cg_14	C	0.2124	0.2425	0.2224	0.2244	0.2204	0.2525	0.2705	0.2505	0.3006	0.2806	0.2565	0.2525	0.2585	0.2365	0.2745	0.2525	0.2445	0.2345	0.2144	0.2445	0.2345	0.2204	0.2445	0.2124	0.2365	0.2004	0.2144	0.1984	0.1944	0.2144	0.2545	0.2024	0.2144	0.1924	0.3086	0.2625	0.2305	0.2144	0.2485	0.2405	0.1623	0.1042	0.0862	0.1102	0.1062	0.1202	0.0882
Fungi_Release38	colletotrichum_gloeosporioides_cg_14	G	0.2725	0.2625	0.2786	0.2786	0.2625	0.2265	0.2204	0.2365	0.2485	0.2024	0.2365	0.2425	0.2224	0.2365	0.2184	0.2365	0.2244	0.2645	0.2665	0.2445	0.2806	0.2745	0.2866	0.2826	0.2485	0.2565	0.2946	0.2365	0.2946	0.2705	0.2445	0.2665	0.2465	0.2425	0.2024	0.1804	0.2425	0.2024	0.2084	0.2645	0.4569	0.5752	0.6413	0.6012	0.5691	0.4389	0.4228
Fungi_Release38	colletotrichum_gloeosporioides_cg_14	T	0.2986	0.2365	0.2585	0.2625	0.2926	0.3086	0.2866	0.2766	0.2585	0.2766	0.2725	0.2786	0.2826	0.2826	0.2766	0.2545	0.2786	0.2806	0.2725	0.2886	0.2405	0.2365	0.2285	0.2345	0.2525	0.2966	0.2645	0.2625	0.2365	0.2485	0.2265	0.2645	0.2806	0.2605	0.2144	0.3267	0.2906	0.2184	0.2224	0.2605	0.1383	0.1443	0.1002	0.1303	0.1102	0.1743	0.0822
Fungi_Release38	acremonium_chrysogenum_atcc_11550	A	0.1835	0.2097	0.1915	0.1976	0.2137	0.2258	0.1996	0.2056	0.2399	0.2117	0.2419	0.2379	0.2137	0.2278	0.2319	0.248	0.2419	0.2359	0.256	0.2298	0.2581	0.2319	0.244	0.246	0.2258	0.2581	0.256	0.2823	0.2581	0.2601	0.256	0.2399	0.2641	0.2641	0.2359	0.2319	0.248	0.2903	0.2601	0.1976	0.2399	0.1492	0.1895	0.2258	0.252	0.2944	0.504
Fungi_Release38	acremonium_chrysogenum_atcc_11550	C	0.3085	0.2964	0.3065	0.3004	0.2843	0.2722	0.3004	0.3165	0.2802	0.3065	0.2802	0.254	0.2843	0.2177	0.2823	0.2177	0.2722	0.246	0.2278	0.1976	0.2097	0.2117	0.2238	0.25	0.2238	0.2379	0.1935	0.2137	0.254	0.2278	0.248	0.2258	0.2359	0.2661	0.2702	0.2399	0.2359	0.2359	0.244	0.2702	0.1371	0.1472	0.0867	0.0948	0.0968	0.127	0.1069
Fungi_Release38	acremonium_chrysogenum_atcc_11550	G	0.2883	0.2258	0.2359	0.2802	0.2319	0.252	0.252	0.2399	0.2601	0.2319	0.2238	0.25	0.2399	0.2762	0.2843	0.2802	0.2681	0.2843	0.3004	0.3246	0.2984	0.3044	0.3004	0.3165	0.3448	0.2944	0.2802	0.2702	0.246	0.2681	0.2782	0.2661	0.2581	0.25	0.246	0.2742	0.2782	0.2762	0.3085	0.375	0.4778	0.5786	0.6371	0.5605	0.5484	0.4173	0.3448
Fungi_Release38	acremonium_chrysogenum_atcc_11550	T	0.2198	0.2681	0.2661	0.2218	0.2702	0.25	0.248	0.2379	0.2198	0.25	0.254	0.2581	0.2621	0.2782	0.2016	0.254	0.2177	0.2339	0.2157	0.248	0.2339	0.252	0.2319	0.1875	0.2056	0.2097	0.2702	0.2339	0.2419	0.244	0.2177	0.2681	0.2419	0.2198	0.248	0.254	0.2379	0.1976	0.1875	0.1573	0.1452	0.125	0.0867	0.119	0.1028	0.1613	0.0444
Fungi_Release38	fonsecaea_nubica	A	0.2444	0.2525	0.2364	0.2061	0.198	0.2424	0.2263	0.2343	0.2303	0.1859	0.2283	0.2626	0.2444	0.2263	0.2626	0.2667	0.2323	0.2485	0.2687	0.2566	0.2667	0.2141	0.2869	0.2808	0.2061	0.2808	0.2808	0.2828	0.2545	0.3071	0.2525	0.2808	0.2606	0.2707	0.2263	0.2323	0.2687	0.2505	0.299	0.1899	0.1939	0.1455	0.1717	0.2202	0.2747	0.3253	0.5313
Fungi_Release38	fonsecaea_nubica	C	0.2444	0.2525	0.2525	0.2444	0.2949	0.2343	0.2485	0.2768	0.2586	0.2768	0.2667	0.2667	0.299	0.2222	0.2747	0.2687	0.2646	0.2525	0.2444	0.2364	0.2182	0.2323	0.2222	0.2061	0.2667	0.2384	0.2404	0.2606	0.2646	0.2162	0.2667	0.2323	0.2343	0.2101	0.2586	0.2485	0.196	0.202	0.198	0.2586	0.1455	0.101	0.0768	0.097	0.0869	0.1192	0.103
Fungi_Release38	fonsecaea_nubica	G	0.2384	0.2404	0.2162	0.299	0.2566	0.2384	0.2222	0.2303	0.2182	0.2444	0.2364	0.1919	0.1778	0.2606	0.2384	0.2364	0.2081	0.2343	0.2424	0.2424	0.2303	0.3051	0.2364	0.2566	0.2525	0.2424	0.2061	0.2424	0.2283	0.2384	0.2182	0.202	0.2263	0.2384	0.2202	0.204	0.2162	0.2687	0.2889	0.3556	0.503	0.6323	0.6384	0.5535	0.499	0.3596	0.2747
Fungi_Release38	fonsecaea_nubica	T	0.2727	0.2545	0.2949	0.2505	0.2505	0.2848	0.303	0.2586	0.2929	0.2929	0.2687	0.2788	0.2788	0.2909	0.2242	0.2283	0.2949	0.2646	0.2444	0.2646	0.2848	0.2485	0.2545	0.2566	0.2747	0.2384	0.2727	0.2141	0.2525	0.2384	0.2626	0.2848	0.2788	0.2808	0.2949	0.3152	0.3192	0.2788	0.2141	0.196	0.1576	0.1212	0.1131	0.1293	0.1394	0.196	0.0909
Fungi_Release38	leptosphaeria_maculans	A	0.2323	0.2263	0.2121	0.2081	0.2606	0.2263	0.2404	0.196	0.2384	0.2323	0.2283	0.2525	0.2343	0.2444	0.2222	0.2384	0.2364	0.2566	0.2384	0.2667	0.2808	0.2505	0.3071	0.2485	0.2828	0.2768	0.2949	0.2545	0.3071	0.2505	0.2646	0.2364	0.2323	0.2101	0.2667	0.2384	0.2384	0.297	0.3172	0.2768	0.2465	0.2182	0.1616	0.1798	0.202	0.2384	0.3657
Fungi_Release38	leptosphaeria_maculans	C	0.202	0.1657	0.202	0.2182	0.1919	0.2141	0.2667	0.2303	0.2202	0.2222	0.2202	0.2465	0.2283	0.2465	0.2444	0.2909	0.2667	0.2667	0.2768	0.2263	0.2182	0.2525	0.202	0.2121	0.2263	0.202	0.2162	0.2121	0.1939	0.2465	0.2121	0.2101	0.2202	0.2101	0.2222	0.2465	0.2343	0.1899	0.1838	0.2202	0.1737	0.1051	0.0889	0.0949	0.0545	0.1131	0.1172
Fungi_Release38	leptosphaeria_maculans	G	0.299	0.3212	0.303	0.299	0.2667	0.2667	0.2424	0.3071	0.2424	0.2747	0.2444	0.2121	0.2545	0.2444	0.2606	0.2444	0.2263	0.2364	0.2424	0.2505	0.2424	0.2707	0.2667	0.2646	0.2747	0.301	0.2727	0.303	0.2525	0.2606	0.2626	0.2788	0.2727	0.2788	0.2707	0.2465	0.2283	0.2364	0.2707	0.2909	0.3919	0.5212	0.6263	0.5919	0.6303	0.4848	0.4465
Fungi_Release38	leptosphaeria_maculans	T	0.2667	0.2869	0.2828	0.2747	0.2808	0.2929	0.2505	0.2667	0.299	0.2707	0.3071	0.2889	0.2828	0.2646	0.2727	0.2263	0.2707	0.2404	0.2424	0.2566	0.2586	0.2263	0.2242	0.2747	0.2162	0.2202	0.2162	0.2303	0.2465	0.2424	0.2606	0.2747	0.2747	0.301	0.2404	0.2687	0.299	0.2768	0.2283	0.2121	0.1879	0.1556	0.1232	0.1333	0.1131	0.1636	0.0707
Fungi_Release38	neurospora_tetrasperma_fgsc_2509	A	0.2384	0.2768	0.2727	0.2303	0.2727	0.2566	0.2364	0.2404	0.2465	0.2566	0.2667	0.2444	0.2525	0.2384	0.2808	0.2848	0.2889	0.2788	0.2727	0.2606	0.2606	0.2566	0.2626	0.2707	0.2909	0.2909	0.3131	0.2727	0.2667	0.2323	0.303	0.2929	0.2929	0.3253	0.2646	0.2485	0.2586	0.303	0.2768	0.2121	0.2141	0.2303	0.2182	0.2283	0.2949	0.3293	0.4667
Fungi_Release38	neurospora_tetrasperma_fgsc_2509	C	0.2364	0.2263	0.2162	0.2202	0.2505	0.2404	0.2303	0.2384	0.2404	0.2606	0.1939	0.2545	0.2384	0.202	0.1818	0.2101	0.198	0.202	0.2	0.202	0.204	0.196	0.2162	0.2081	0.2182	0.2465	0.1899	0.2283	0.2808	0.2141	0.202	0.2121	0.202	0.2162	0.2182	0.1939	0.2343	0.1758	0.1838	0.2	0.1273	0.0889	0.0869	0.097	0.099	0.097	0.1071
Fungi_Release38	neurospora_tetrasperma_fgsc_2509	G	0.2727	0.2788	0.2606	0.2949	0.2465	0.2525	0.2687	0.2929	0.2707	0.2667	0.2687	0.2667	0.2404	0.3071	0.2828	0.2626	0.2788	0.2768	0.2667	0.2848	0.2929	0.2747	0.297	0.297	0.2525	0.2061	0.2646	0.2606	0.2444	0.2747	0.2505	0.2687	0.2525	0.2263	0.2606	0.2747	0.2707	0.3192	0.3374	0.4	0.5091	0.5515	0.5939	0.5414	0.4869	0.3717	0.3596
Fungi_Release38	neurospora_tetrasperma_fgsc_2509	T	0.2525	0.2182	0.2505	0.2545	0.2303	0.2505	0.2646	0.2283	0.2424	0.2162	0.2707	0.2343	0.2687	0.2525	0.2545	0.2424	0.2343	0.2424	0.2606	0.2525	0.2424	0.2727	0.2242	0.2242	0.2384	0.2566	0.2323	0.2384	0.2081	0.2788	0.2444	0.2263	0.2525	0.2323	0.2566	0.2828	0.2364	0.202	0.202	0.1879	0.1495	0.1293	0.101	0.1333	0.1192	0.202	0.0667
Fungi_Release38	pseudogymnoascus_sp_vkm_f_4520_fw_2644_	A	0.2465	0.2162	0.2061	0.2404	0.2283	0.2525	0.2364	0.2263	0.1859	0.2323	0.202	0.2586	0.2283	0.2444	0.2384	0.2404	0.2485	0.2646	0.2444	0.2768	0.2404	0.2566	0.2566	0.2828	0.3232	0.2586	0.2606	0.303	0.2343	0.3333	0.2505	0.2424	0.3232	0.2808	0.2828	0.2768	0.2768	0.3293	0.3071	0.2404	0.2323	0.196	0.1677	0.1616	0.2121	0.2646	0.4848
Fungi_Release38	pseudogymnoascus_sp_vkm_f_4520_fw_2644_	C	0.2162	0.2081	0.204	0.204	0.2303	0.202	0.2343	0.2444	0.2121	0.2202	0.2586	0.2263	0.2424	0.2525	0.2505	0.2162	0.1717	0.2162	0.2242	0.1919	0.2242	0.1879	0.1879	0.1717	0.1717	0.2101	0.2121	0.1697	0.1778	0.1798	0.2242	0.198	0.1677	0.2101	0.2182	0.2283	0.2061	0.1657	0.1879	0.1778	0.1253	0.0808	0.099	0.0626	0.0606	0.1091	0.097
Fungi_Release38	pseudogymnoascus_sp_vkm_f_4520_fw_2644_	G	0.2727	0.2707	0.2808	0.2727	0.2566	0.2727	0.2626	0.2707	0.2828	0.2566	0.2505	0.2485	0.2465	0.2303	0.2667	0.2525	0.2869	0.2384	0.2545	0.2545	0.2646	0.2707	0.3071	0.2646	0.2646	0.303	0.2929	0.2747	0.3131	0.2566	0.2485	0.2444	0.2404	0.2485	0.2364	0.2323	0.2182	0.2444	0.2404	0.3333	0.4505	0.5919	0.6061	0.6	0.6121	0.4242	0.3313
Fungi_Release38	pseudogymnoascus_sp_vkm_f_4520_fw_2644_	T	0.2646	0.3051	0.3091	0.2828	0.2848	0.2727	0.2667	0.2586	0.3192	0.2909	0.2889	0.2667	0.2828	0.2727	0.2444	0.2909	0.2929	0.2808	0.2768	0.2768	0.2707	0.2848	0.2485	0.2808	0.2404	0.2283	0.2343	0.2525	0.2747	0.2303	0.2768	0.3152	0.2687	0.2606	0.2626	0.2626	0.299	0.2606	0.2646	0.2485	0.1919	0.1313	0.1273	0.1758	0.1152	0.202	0.0869
Fungi_Release38	aspergillus_oryzae_gca_002007945	A	0.2328	0.2267	0.2287	0.247	0.2206	0.1943	0.2206	0.2409	0.2126	0.2611	0.2186	0.2348	0.2389	0.2632	0.2065	0.2854	0.2895	0.2551	0.251	0.2571	0.2591	0.2591	0.2773	0.2672	0.2692	0.3158	0.2955	0.3057	0.3016	0.2773	0.3077	0.2834	0.2773	0.3097	0.2551	0.2571	0.3117	0.334	0.2632	0.2429	0.2753	0.2146	0.1883	0.1862	0.2551	0.2955	0.5101
Fungi_Release38	aspergillus_oryzae_gca_002007945	C	0.1883	0.2146	0.253	0.2368	0.2227	0.2571	0.2773	0.2429	0.2611	0.2247	0.2713	0.253	0.2287	0.2227	0.2632	0.2085	0.2247	0.2389	0.2004	0.1923	0.2146	0.166	0.1883	0.1923	0.2085	0.1984	0.1619	0.1822	0.2126	0.1964	0.2429	0.2024	0.2227	0.2429	0.247	0.2105	0.2105	0.1903	0.2429	0.1721	0.1296	0.1012	0.0789	0.085	0.0648	0.0931	0.0769
Fungi_Release38	aspergillus_oryzae_gca_002007945	G	0.247	0.2166	0.1943	0.2247	0.2004	0.2227	0.2045	0.1903	0.1842	0.1923	0.2267	0.1923	0.2024	0.2166	0.2429	0.2227	0.1923	0.2449	0.2308	0.2227	0.2409	0.2814	0.2733	0.2692	0.2571	0.2328	0.2713	0.2389	0.2186	0.2348	0.1923	0.1862	0.2611	0.1741	0.1862	0.2065	0.2186	0.1842	0.2247	0.3239	0.4372	0.5445	0.5911	0.5769	0.5648	0.3603	0.3138
Fungi_Release38	aspergillus_oryzae_gca_002007945	T	0.332	0.3421	0.3239	0.2915	0.3563	0.3259	0.2976	0.3259	0.3421	0.3219	0.2834	0.3198	0.33	0.2976	0.2874	0.2834	0.2935	0.2611	0.3178	0.3279	0.2854	0.2935	0.2611	0.2713	0.2652	0.253	0.2713	0.2733	0.2672	0.2915	0.2571	0.3279	0.2389	0.2733	0.3117	0.3259	0.2591	0.2915	0.2692	0.2611	0.1579	0.1397	0.1417	0.1518	0.1154	0.251	0.0992
Fungi_Release38	drechmeria_coniospora	A	0.1377	0.2004	0.1235	0.17	0.1883	0.1316	0.1619	0.2247	0.168	0.1437	0.1741	0.1559	0.1559	0.1842	0.1862	0.2065	0.2024	0.1923	0.2368	0.2065	0.1802	0.166	0.2065	0.1781	0.1883	0.2409	0.2186	0.2267	0.2065	0.1619	0.1862	0.2348	0.2126	0.2065	0.2287	0.1964	0.2571	0.2854	0.2429	0.1842	0.1579	0.1802	0.1903	0.2004	0.1903	0.2348	0.2733
Fungi_Release38	drechmeria_coniospora	C	0.3603	0.3563	0.3846	0.3138	0.3401	0.3603	0.3907	0.3016	0.3725	0.3522	0.3462	0.3219	0.3826	0.3482	0.2915	0.3117	0.3097	0.3401	0.2773	0.2874	0.3057	0.3057	0.2753	0.2611	0.2935	0.2773	0.2854	0.2794	0.2692	0.2915	0.2814	0.2935	0.2895	0.3117	0.2854	0.2814	0.251	0.2328	0.2814	0.2733	0.1984	0.1356	0.1336	0.1862	0.1296	0.1538	0.1417
Fungi_Release38	drechmeria_coniospora	G	0.2652	0.251	0.2895	0.3117	0.2753	0.2814	0.2733	0.2854	0.2652	0.2814	0.2652	0.33	0.253	0.3117	0.3016	0.2733	0.2976	0.2753	0.2996	0.3057	0.3279	0.3178	0.3219	0.3421	0.3138	0.332	0.3077	0.3401	0.3441	0.3158	0.2915	0.2571	0.2915	0.3138	0.2551	0.2551	0.2672	0.3138	0.336	0.4008	0.5526	0.6154	0.583	0.5142	0.6194	0.4433	0.5587
Fungi_Release38	drechmeria_coniospora	T	0.2368	0.1923	0.2024	0.2045	0.1964	0.2267	0.1741	0.1883	0.1943	0.2227	0.2146	0.1923	0.2085	0.1559	0.2206	0.2085	0.1903	0.1923	0.1862	0.2004	0.1862	0.2105	0.1964	0.2186	0.2045	0.1498	0.1883	0.1538	0.1802	0.2308	0.2409	0.2146	0.2065	0.168	0.2308	0.2672	0.2247	0.168	0.1397	0.1417	0.0911	0.0688	0.0931	0.0992	0.0607	0.168	0.0263
Fungi_Release38	cladophialophora_bantiana_cbs_173_52	A	0.2434	0.217	0.2191	0.2576	0.2089	0.2454	0.2394	0.2028	0.2231	0.2414	0.2272	0.2394	0.2657	0.2272	0.2312	0.2495	0.2353	0.2535	0.2353	0.2373	0.2211	0.217	0.2718	0.284	0.2617	0.2535	0.2819	0.2698	0.288	0.2657	0.2454	0.2535	0.2495	0.2231	0.2576	0.2272	0.2738	0.3103	0.286	0.2008	0.2434	0.2069	0.2069	0.1968	0.2535	0.3185	0.4503
Fungi_Release38	cladophialophora_bantiana_cbs_173_52	C	0.1988	0.2617	0.2617	0.2698	0.2475	0.2231	0.2556	0.2657	0.2819	0.2657	0.2819	0.286	0.2394	0.2657	0.2535	0.217	0.2353	0.2373	0.2394	0.2434	0.2454	0.2231	0.2069	0.2434	0.2373	0.2252	0.2576	0.215	0.215	0.2637	0.2556	0.2718	0.217	0.2495	0.2475	0.2901	0.1968	0.2211	0.1947	0.2353	0.142	0.0994	0.1156	0.1075	0.1034	0.14	0.0994
Fungi_Release38	cladophialophora_bantiana_cbs_173_52	G	0.2535	0.2515	0.2312	0.2211	0.2475	0.2535	0.2211	0.2191	0.2231	0.215	0.2394	0.2454	0.2373	0.211	0.2576	0.2637	0.2556	0.2373	0.2475	0.2272	0.2556	0.2576	0.2637	0.2292	0.2515	0.2698	0.2231	0.2475	0.2576	0.213	0.2333	0.1886	0.2292	0.2394	0.215	0.1866	0.2252	0.2596	0.3022	0.3408	0.4746	0.5416	0.5761	0.5436	0.5456	0.4057	0.3753
Fungi_Release38	cladophialophora_bantiana_cbs_173_52	T	0.3043	0.2698	0.288	0.2515	0.2961	0.2779	0.284	0.3124	0.2718	0.2779	0.2515	0.2292	0.2576	0.2961	0.2576	0.2698	0.2738	0.2718	0.2779	0.2921	0.2779	0.3022	0.2576	0.2434	0.2495	0.2515	0.2373	0.2677	0.2394	0.2576	0.2657	0.286	0.3043	0.288	0.2799	0.2961	0.3043	0.2089	0.217	0.2231	0.14	0.1521	0.1014	0.1521	0.0974	0.1359	0.0751
Fungi_Release38	rasamsonia_emersonii_cbs_393_64	A	0.2342	0.2342	0.2403	0.2159	0.222	0.2709	0.2322	0.2546	0.2057	0.2505	0.2566	0.22	0.2872	0.2444	0.2525	0.1976	0.2607	0.2587	0.2648	0.2709	0.2627	0.2546	0.2566	0.2648	0.2525	0.2464	0.2688	0.2892	0.2383	0.2688	0.3055	0.2831	0.2811	0.2587	0.2281	0.2729	0.277	0.2872	0.2974	0.2383	0.2424	0.2077	0.1874	0.1976	0.2261	0.2749	0.501
Fungi_Release38	rasamsonia_emersonii_cbs_393_64	C	0.2077	0.22	0.2159	0.2261	0.2546	0.2322	0.222	0.2525	0.2546	0.2525	0.2363	0.22	0.2098	0.2383	0.2322	0.2688	0.2138	0.2424	0.2037	0.1976	0.2057	0.2016	0.2077	0.1813	0.2098	0.2037	0.2037	0.2037	0.2261	0.2301	0.22	0.2424	0.2138	0.22	0.2729	0.2403	0.1996	0.2077	0.1894	0.1955	0.1283	0.0957	0.0998	0.0855	0.0652	0.1161	0.0957
Fungi_Release38	rasamsonia_emersonii_cbs_393_64	G	0.2525	0.2525	0.2424	0.2525	0.2322	0.222	0.222	0.2322	0.2383	0.2281	0.1996	0.2261	0.2016	0.2159	0.2179	0.2057	0.1935	0.1935	0.2138	0.2301	0.2322	0.2607	0.1996	0.2627	0.2749	0.2444	0.2851	0.2485	0.2505	0.2444	0.22	0.2037	0.1894	0.1996	0.2077	0.1833	0.2342	0.2363	0.2607	0.3442	0.4705	0.5458	0.5866	0.5377	0.5988	0.389	0.3259
Fungi_Release38	rasamsonia_emersonii_cbs_393_64	T	0.3055	0.2933	0.3014	0.3055	0.2912	0.2749	0.3238	0.2607	0.3014	0.2688	0.3075	0.334	0.3014	0.3014	0.2974	0.3279	0.332	0.3055	0.3177	0.3014	0.2994	0.2831	0.336	0.2912	0.2627	0.3055	0.2424	0.2587	0.2851	0.2566	0.2546	0.2709	0.3157	0.3218	0.2912	0.3035	0.2892	0.2688	0.2525	0.222	0.1589	0.1507	0.1263	0.1792	0.11	0.22	0.0774
Fungi_Release38	aspergillus_luchuensis	A	0.2029	0.2172	0.2582	0.2111	0.2418	0.2275	0.2439	0.248	0.2234	0.2787	0.25	0.2193	0.2275	0.2398	0.25	0.2725	0.2623	0.2398	0.2439	0.2807	0.2889	0.2869	0.2684	0.2807	0.248	0.2951	0.2725	0.2684	0.3053	0.2992	0.2664	0.2848	0.2561	0.3115	0.2684	0.2664	0.2541	0.2746	0.2643	0.2172	0.2418	0.2234	0.1885	0.2275	0.2459	0.2746	0.4631
Fungi_Release38	aspergillus_luchuensis	C	0.2111	0.2398	0.2439	0.2316	0.248	0.2193	0.2275	0.2152	0.2172	0.2275	0.2377	0.2643	0.2377	0.2193	0.1803	0.2131	0.2254	0.2152	0.1885	0.1885	0.2193	0.1742	0.1988	0.2111	0.1906	0.1844	0.2029	0.1906	0.166	0.1783	0.2213	0.209	0.2275	0.1988	0.2152	0.2275	0.1947	0.1619	0.1803	0.168	0.1209	0.082	0.0779	0.0697	0.0738	0.0697	0.0676
Fungi_Release38	aspergillus_luchuensis	G	0.2787	0.2439	0.2254	0.2336	0.2295	0.2193	0.2418	0.2418	0.2275	0.2008	0.2213	0.2459	0.2172	0.2275	0.2336	0.2131	0.2316	0.252	0.2602	0.2418	0.2131	0.2541	0.25	0.2398	0.2459	0.2418	0.248	0.2316	0.2254	0.252	0.2029	0.2377	0.2234	0.2049	0.1947	0.1803	0.2377	0.2705	0.2971	0.3361	0.4795	0.4939	0.582	0.5205	0.5492	0.3873	0.3791
Fungi_Release38	aspergillus_luchuensis	T	0.3074	0.2992	0.2725	0.3238	0.2807	0.334	0.2869	0.2951	0.332	0.293	0.291	0.2705	0.3176	0.3135	0.3361	0.3012	0.2807	0.293	0.3074	0.2889	0.2787	0.2848	0.2828	0.2684	0.3156	0.2787	0.2766	0.3094	0.3033	0.2705	0.3094	0.2684	0.293	0.2848	0.3217	0.3258	0.3135	0.293	0.2582	0.2787	0.1578	0.2008	0.1516	0.1824	0.1311	0.2684	0.0902
Fungi_Release38	aspergillus_ruber_cbs_135680	A	0.2172	0.1988	0.2377	0.2254	0.2275	0.2152	0.2213	0.1947	0.2172	0.2234	0.209	0.2316	0.2152	0.1762	0.2295	0.252	0.248	0.2172	0.2807	0.252	0.2541	0.2684	0.291	0.2643	0.2746	0.2828	0.2807	0.2684	0.2766	0.2725	0.2787	0.2725	0.2787	0.291	0.291	0.2725	0.2541	0.25	0.2684	0.293	0.3279	0.2418	0.1844	0.1803	0.2357	0.2787	0.4775
Fungi_Release38	aspergillus_ruber_cbs_135680	C	0.1906	0.2602	0.2049	0.2275	0.2439	0.2705	0.2664	0.2193	0.248	0.248	0.252	0.2234	0.2746	0.252	0.2029	0.2029	0.2111	0.2439	0.2049	0.1906	0.1844	0.1865	0.1578	0.1824	0.1844	0.1557	0.1742	0.1803	0.1721	0.1762	0.1783	0.1475	0.1639	0.2131	0.1803	0.1988	0.1762	0.2131	0.1967	0.1352	0.1148	0.1393	0.1148	0.0717	0.0615	0.0697	0.0758
Fungi_Release38	aspergillus_ruber_cbs_135680	G	0.2602	0.2725	0.209	0.2172	0.2008	0.2049	0.168	0.2295	0.1803	0.1824	0.2029	0.207	0.207	0.2582	0.2684	0.2439	0.2357	0.2295	0.2316	0.2664	0.2828	0.2869	0.2377	0.2582	0.252	0.2971	0.2459	0.3012	0.3094	0.2992	0.2705	0.2254	0.2807	0.2541	0.2193	0.2705	0.2848	0.2889	0.2459	0.2951	0.418	0.4734	0.5574	0.5943	0.5922	0.4529	0.3607
Fungi_Release38	aspergillus_ruber_cbs_135680	T	0.332	0.2684	0.3484	0.3299	0.3279	0.3094	0.3443	0.3566	0.3545	0.3463	0.3361	0.3381	0.3033	0.3135	0.2992	0.3012	0.3053	0.3094	0.2828	0.291	0.2787	0.2582	0.3135	0.2951	0.2889	0.2643	0.2992	0.25	0.2418	0.252	0.2725	0.3545	0.2766	0.2418	0.3094	0.2582	0.2848	0.248	0.2889	0.2766	0.1393	0.1455	0.1434	0.1537	0.1107	0.1988	0.0861
Fungi_Release38	aspergillus_cristatus	A	0.2012	0.191	0.191	0.1869	0.1951	0.2238	0.2505	0.1663	0.2259	0.2074	0.1745	0.191	0.23	0.2259	0.2197	0.2402	0.2526	0.2279	0.2608	0.232	0.2526	0.2977	0.2731	0.2752	0.2608	0.2587	0.3224	0.2895	0.2875	0.2402	0.2752	0.2834	0.306	0.2505	0.2402	0.2402	0.2772	0.2731	0.2875	0.2854	0.3511	0.2444	0.1643	0.1561	0.2238	0.3224	0.4928
Fungi_Release38	aspergillus_cristatus	C	0.2115	0.2074	0.2033	0.2752	0.2156	0.2587	0.2423	0.2608	0.2197	0.2402	0.2669	0.2485	0.2402	0.2464	0.2341	0.2444	0.1828	0.1889	0.1745	0.2074	0.1725	0.1499	0.191	0.1643	0.1766	0.1437	0.1848	0.1355	0.1314	0.1704	0.1951	0.1684	0.1622	0.2074	0.1971	0.2136	0.1745	0.2094	0.1992	0.1355	0.1355	0.1253	0.1129	0.0534	0.0452	0.0452	0.0862
Fungi_Release38	aspergillus_cristatus	G	0.2444	0.2649	0.2669	0.1992	0.2156	0.1889	0.1971	0.2033	0.2238	0.191	0.191	0.23	0.1992	0.2259	0.232	0.2464	0.2177	0.2587	0.2402	0.2361	0.2977	0.2669	0.2464	0.2916	0.2977	0.3429	0.2649	0.2772	0.2834	0.2772	0.2731	0.2279	0.2628	0.269	0.232	0.2546	0.2628	0.2669	0.2382	0.306	0.3799	0.4579	0.5811	0.6366	0.6099	0.4025	0.3347
Fungi_Release38	aspergillus_cristatus	T	0.3429	0.3368	0.3388	0.3388	0.3737	0.3285	0.3101	0.3696	0.3306	0.3614	0.3676	0.3306	0.3306	0.3018	0.3142	0.269	0.347	0.3244	0.3244	0.3244	0.2772	0.2854	0.2895	0.269	0.2649	0.2546	0.2279	0.2977	0.2977	0.3121	0.2567	0.3203	0.269	0.2731	0.3306	0.2916	0.2854	0.2505	0.2752	0.2731	0.1335	0.1725	0.1417	0.154	0.1211	0.23	0.0862
Fungi_Release38	eutypa_lata_ucrel1	A	0.2567	0.23	0.2731	0.2485	0.2505	0.232	0.2772	0.2669	0.2649	0.2464	0.2772	0.2587	0.2895	0.2813	0.2608	0.2772	0.2772	0.2464	0.2895	0.2957	0.3101	0.2608	0.2854	0.2895	0.3101	0.306	0.2731	0.2977	0.2854	0.3018	0.271	0.2957	0.2977	0.2998	0.308	0.2895	0.2875	0.2587	0.3039	0.2053	0.2115	0.2505	0.2259	0.2628	0.2834	0.3203	0.4867
Fungi_Release38	eutypa_lata_ucrel1	C	0.2546	0.2238	0.2177	0.2649	0.2772	0.2752	0.2177	0.2505	0.2567	0.2361	0.2197	0.23	0.2402	0.2177	0.2341	0.2669	0.2136	0.2402	0.23	0.2012	0.2094	0.1992	0.2279	0.2136	0.1951	0.23	0.232	0.2012	0.2649	0.2053	0.232	0.2259	0.23	0.2526	0.2361	0.2402	0.2156	0.2197	0.2033	0.2136	0.1232	0.0903	0.0739	0.0821	0.0616	0.1088	0.0965
Fungi_Release38	eutypa_lata_ucrel1	G	0.2361	0.23	0.2279	0.2259	0.2218	0.1971	0.2136	0.2156	0.2074	0.2156	0.2218	0.2218	0.1951	0.2053	0.2402	0.1889	0.2444	0.2259	0.1971	0.2772	0.2505	0.2526	0.2218	0.2259	0.2094	0.2136	0.2115	0.2033	0.1951	0.2156	0.2094	0.2094	0.193	0.1951	0.1828	0.2094	0.1992	0.2772	0.2875	0.3778	0.5195	0.538	0.5524	0.5195	0.5359	0.3901	0.2957
Fungi_Release38	eutypa_lata_ucrel1	T	0.2526	0.3162	0.2813	0.2608	0.2505	0.2957	0.2916	0.2669	0.271	0.3018	0.2813	0.2895	0.2752	0.2957	0.2649	0.2669	0.2649	0.2875	0.2834	0.2259	0.23	0.2875	0.2649	0.271	0.2854	0.2505	0.2834	0.2977	0.2546	0.2772	0.2875	0.269	0.2793	0.2526	0.2731	0.2608	0.2977	0.2444	0.2053	0.2033	0.1458	0.1211	0.1478	0.1355	0.1191	0.1807	0.1211
Fungi_Release38	cordyceps_militaris_cm01	A	0.2282	0.2365	0.2054	0.2365	0.2303	0.2324	0.2469	0.2054	0.2137	0.1909	0.2137	0.2261	0.249	0.2158	0.2324	0.2178	0.2614	0.2303	0.2635	0.2386	0.2095	0.2178	0.2593	0.2801	0.2469	0.2324	0.2095	0.278	0.2573	0.2593	0.2469	0.2427	0.2842	0.2656	0.2842	0.2656	0.2988	0.2469	0.305	0.195	0.1867	0.222	0.1888	0.195	0.2635	0.2531	0.4461
Fungi_Release38	cordyceps_militaris_cm01	C	0.2635	0.251	0.2531	0.2822	0.2676	0.2946	0.2697	0.2739	0.2884	0.2842	0.2718	0.3091	0.2863	0.2552	0.2718	0.2469	0.249	0.2842	0.251	0.2095	0.2593	0.2427	0.222	0.2531	0.2614	0.2635	0.2365	0.2241	0.2407	0.2593	0.2573	0.2303	0.251	0.2573	0.2386	0.2656	0.2158	0.2303	0.2033	0.2427	0.1452	0.1203	0.139	0.1349	0.0851	0.1307	0.0975
Fungi_Release38	cordyceps_militaris_cm01	G	0.2759	0.2614	0.2884	0.2344	0.2656	0.2365	0.2365	0.2573	0.2676	0.2593	0.2801	0.2386	0.2427	0.2842	0.2573	0.2718	0.2552	0.2365	0.2427	0.2365	0.2635	0.2863	0.2697	0.222	0.2593	0.2448	0.2988	0.2676	0.2448	0.2407	0.2303	0.2407	0.2075	0.2261	0.2344	0.2054	0.2552	0.278	0.2925	0.3361	0.4896	0.5685	0.5871	0.5249	0.5249	0.4523	0.39
Fungi_Release38	cordyceps_militaris_cm01	T	0.2324	0.251	0.2531	0.2469	0.2365	0.2365	0.2469	0.2635	0.2303	0.2656	0.2344	0.2261	0.222	0.2448	0.2386	0.2635	0.2344	0.249	0.2427	0.3154	0.2676	0.2531	0.249	0.2448	0.2324	0.2593	0.2552	0.2303	0.2573	0.2407	0.2656	0.2863	0.2573	0.251	0.2427	0.2635	0.2303	0.2448	0.1992	0.2261	0.1784	0.0892	0.0851	0.1452	0.1266	0.1639	0.0664
Fungi_Release38	scedosporium_apiospermum	A	0.2463	0.2797	0.215	0.2276	0.2276	0.2317	0.2296	0.2443	0.2255	0.2422	0.2213	0.2568	0.2547	0.2463	0.2129	0.2359	0.2505	0.261	0.2129	0.2693	0.2714	0.261	0.2839	0.3006	0.261	0.3194	0.2484	0.2338	0.2944	0.3006	0.3299	0.3236	0.2797	0.2985	0.286	0.3236	0.2756	0.2756	0.2276	0.1816	0.1712	0.167	0.2046	0.2129	0.3069	0.357	0.5303
Fungi_Release38	scedosporium_apiospermum	C	0.2526	0.2276	0.263	0.2797	0.2902	0.3069	0.2714	0.2463	0.2839	0.2505	0.2484	0.2777	0.2255	0.2443	0.286	0.2296	0.2422	0.2526	0.2484	0.2255	0.2088	0.2505	0.2443	0.2067	0.1942	0.2276	0.2255	0.2192	0.2004	0.2234	0.2526	0.2276	0.261	0.2296	0.2463	0.2067	0.2296	0.2234	0.2359	0.2046	0.1106	0.0939	0.0752	0.1148	0.0981	0.1232	0.1169
Fungi_Release38	scedosporium_apiospermum	G	0.2171	0.2088	0.1879	0.2401	0.2171	0.2088	0.2296	0.2276	0.2046	0.1983	0.261	0.2067	0.2505	0.2338	0.2129	0.2505	0.2317	0.215	0.263	0.263	0.2422	0.238	0.2255	0.2192	0.2526	0.2276	0.2589	0.2547	0.2004	0.2004	0.1879	0.1816	0.1962	0.1921	0.1733	0.1858	0.2317	0.2359	0.309	0.3862	0.5553	0.6451	0.6096	0.5198	0.4635	0.3173	0.2589
Fungi_Release38	scedosporium_apiospermum	T	0.2839	0.2839	0.334	0.2526	0.2651	0.2526	0.2693	0.2818	0.286	0.309	0.2693	0.2589	0.2693	0.2756	0.2881	0.2839	0.2756	0.2714	0.2756	0.2422	0.2777	0.2505	0.2463	0.2735	0.2923	0.2255	0.2672	0.2923	0.3048	0.2756	0.2296	0.2672	0.263	0.2797	0.2944	0.2839	0.263	0.2651	0.2276	0.2276	0.1628	0.0939	0.1106	0.1524	0.1315	0.2025	0.0939
Fungi_Release38	histoplasma_capsulatum_h88	A	0.2626	0.2458	0.2479	0.2647	0.2773	0.2605	0.271	0.208	0.2689	0.2752	0.2542	0.2878	0.2563	0.2542	0.2962	0.2668	0.2647	0.2605	0.2962	0.2542	0.2899	0.2584	0.2794	0.2647	0.2626	0.3025	0.2983	0.3109	0.2773	0.2731	0.2605	0.2899	0.2563	0.3004	0.292	0.2626	0.2752	0.2437	0.2374	0.1471	0.2185	0.1891	0.2311	0.2857	0.3424	0.3004	0.4706
Fungi_Release38	histoplasma_capsulatum_h88	C	0.2269	0.2395	0.2395	0.2227	0.1996	0.2227	0.2206	0.2605	0.2143	0.2059	0.2248	0.208	0.2143	0.2332	0.1996	0.2017	0.1849	0.1933	0.2353	0.2143	0.1996	0.2332	0.187	0.187	0.2353	0.2416	0.2227	0.2038	0.1765	0.1681	0.2164	0.2437	0.208	0.2017	0.2017	0.1576	0.2164	0.2017	0.1996	0.1702	0.1008	0.0651	0.0756	0.084	0.1071	0.1113	0.0819
Fungi_Release38	histoplasma_capsulatum_h88	G	0.2269	0.1996	0.2122	0.1996	0.1975	0.2311	0.2269	0.2332	0.2332	0.2185	0.229	0.2248	0.2122	0.2164	0.208	0.1954	0.2269	0.2521	0.1786	0.2122	0.208	0.1912	0.2521	0.2038	0.1996	0.1618	0.1933	0.1912	0.229	0.1996	0.2248	0.1828	0.2185	0.1954	0.187	0.2437	0.2437	0.2605	0.313	0.4076	0.5315	0.6071	0.5756	0.4433	0.4181	0.3487	0.3697
Fungi_Release38	histoplasma_capsulatum_h88	T	0.2836	0.3151	0.3004	0.313	0.3256	0.2857	0.2815	0.2983	0.2836	0.3004	0.292	0.2794	0.3172	0.2962	0.2962	0.3361	0.3235	0.2941	0.2899	0.3193	0.3025	0.3172	0.2815	0.3445	0.3025	0.2941	0.2857	0.2941	0.3172	0.3592	0.2983	0.2836	0.3172	0.3025	0.3193	0.3361	0.2647	0.2941	0.25	0.2752	0.1492	0.1387	0.1176	0.187	0.1324	0.2395	0.0777
Fungi_Release38	trichoderma_virens	A	0.2374	0.2668	0.2416	0.1954	0.2437	0.2374	0.2437	0.2353	0.2269	0.2773	0.2143	0.2815	0.2773	0.2542	0.2899	0.2899	0.2752	0.2731	0.2521	0.2353	0.2731	0.2815	0.2899	0.2962	0.313	0.292	0.2626	0.2794	0.3214	0.2899	0.2458	0.2752	0.2689	0.2479	0.292	0.3109	0.3193	0.3025	0.2815	0.2101	0.2122	0.2227	0.208	0.2374	0.2941	0.2983	0.4496
Fungi_Release38	trichoderma_virens	C	0.2248	0.2542	0.2563	0.2521	0.2584	0.2458	0.2437	0.2122	0.2374	0.2185	0.2206	0.2059	0.2269	0.2542	0.2227	0.208	0.2059	0.2248	0.2017	0.2311	0.1849	0.2038	0.1912	0.208	0.2143	0.1996	0.1975	0.2038	0.1954	0.2017	0.2185	0.187	0.2017	0.2521	0.2458	0.2185	0.187	0.1996	0.1954	0.1744	0.1324	0.1282	0.0966	0.1008	0.0714	0.1029	0.1155
Fungi_Release38	trichoderma_virens	G	0.2227	0.2164	0.187	0.2752	0.2269	0.229	0.2185	0.2479	0.2269	0.229	0.25	0.2185	0.2101	0.2143	0.2248	0.2059	0.271	0.2458	0.2248	0.2269	0.2731	0.2416	0.2647	0.2668	0.2332	0.2542	0.25	0.2458	0.2059	0.2563	0.2458	0.2311	0.2311	0.2395	0.1681	0.1975	0.2185	0.271	0.3046	0.3676	0.479	0.5315	0.5588	0.5147	0.521	0.4265	0.3529
Fungi_Release38	trichoderma_virens	T	0.3151	0.2626	0.3151	0.2773	0.271	0.2878	0.2941	0.3046	0.3088	0.2752	0.3151	0.2941	0.2857	0.2773	0.2626	0.2962	0.2479	0.2563	0.3214	0.3067	0.2689	0.2731	0.2542	0.229	0.2395	0.2542	0.2899	0.271	0.2773	0.2521	0.2899	0.3067	0.2983	0.2605	0.2941	0.2731	0.2752	0.2269	0.2185	0.2479	0.1765	0.1176	0.1366	0.1471	0.1134	0.1723	0.0819
Fungi_Release38	colletotrichum_orchidophilum	A	0.2669	0.2627	0.2458	0.2394	0.1992	0.25	0.2182	0.2267	0.2288	0.25	0.2309	0.2267	0.2288	0.2225	0.2754	0.2521	0.2415	0.2479	0.2458	0.2648	0.286	0.2648	0.3114	0.3072	0.2924	0.2945	0.2691	0.2818	0.2733	0.2712	0.25	0.2712	0.2648	0.2564	0.2394	0.2627	0.3199	0.2797	0.25	0.1928	0.214	0.1737	0.2097	0.1992	0.2585	0.339	0.5339
Fungi_Release38	colletotrichum_orchidophilum	C	0.2288	0.2182	0.2542	0.2394	0.2627	0.2352	0.2691	0.2606	0.2712	0.2585	0.25	0.2436	0.2648	0.2352	0.2309	0.2542	0.2076	0.2288	0.2203	0.2225	0.2225	0.2394	0.2076	0.2182	0.2034	0.214	0.2034	0.2097	0.2331	0.2373	0.2203	0.2161	0.2352	0.2691	0.2564	0.2627	0.2055	0.2203	0.2479	0.25	0.1419	0.0847	0.0826	0.1271	0.1208	0.1144	0.089
Fungi_Release38	colletotrichum_orchidophilum	G	0.2288	0.25	0.2331	0.2331	0.2712	0.2352	0.2225	0.2415	0.2352	0.2479	0.2797	0.2394	0.2691	0.286	0.2055	0.25	0.2669	0.2797	0.2818	0.2627	0.2415	0.2818	0.2712	0.2415	0.2775	0.2564	0.2797	0.2627	0.2585	0.2436	0.2479	0.2288	0.2394	0.2415	0.2076	0.2161	0.2288	0.2479	0.3008	0.339	0.4788	0.6017	0.6186	0.5593	0.5233	0.375	0.3136
Fungi_Release38	colletotrichum_orchidophilum	T	0.2754	0.2691	0.2669	0.2881	0.2669	0.2797	0.2903	0.2712	0.2648	0.2436	0.2394	0.2903	0.2373	0.2564	0.2881	0.2436	0.2839	0.2436	0.2521	0.25	0.25	0.214	0.2097	0.2331	0.2267	0.2352	0.2479	0.2458	0.2352	0.2479	0.2818	0.2839	0.2606	0.2331	0.2966	0.2585	0.2458	0.2521	0.2013	0.2182	0.1653	0.1398	0.089	0.1144	0.0975	0.1716	0.0636
Fungi_Release38	fonsecaea_erecta	A	0.25	0.214	0.2055	0.2627	0.2436	0.2309	0.197	0.214	0.2203	0.1928	0.1949	0.2161	0.2076	0.2225	0.2627	0.2436	0.2436	0.2352	0.25	0.25	0.2754	0.2436	0.2564	0.2479	0.2288	0.2267	0.2733	0.2585	0.2542	0.2754	0.197	0.2436	0.2182	0.2373	0.2267	0.2606	0.2542	0.2754	0.2754	0.1949	0.2161	0.1886	0.1589	0.1907	0.2436	0.322	0.4746
Fungi_Release38	fonsecaea_erecta	C	0.2373	0.2246	0.2373	0.2288	0.2542	0.2669	0.3114	0.2924	0.2564	0.286	0.2839	0.3051	0.3157	0.3072	0.2267	0.2564	0.2436	0.2606	0.2627	0.2246	0.2288	0.2225	0.2436	0.2564	0.2352	0.2669	0.2606	0.2669	0.2606	0.2331	0.2394	0.2288	0.2585	0.2542	0.2564	0.2648	0.2288	0.2119	0.2097	0.25	0.1674	0.1123	0.0869	0.0932	0.1229	0.1102	0.1314
Fungi_Release38	fonsecaea_erecta	G	0.25	0.2924	0.2945	0.25	0.2564	0.2436	0.2542	0.197	0.2373	0.2458	0.2479	0.214	0.2119	0.2119	0.2203	0.2542	0.2542	0.2458	0.2352	0.2691	0.2436	0.3008	0.2627	0.2669	0.2797	0.2542	0.25	0.2542	0.2288	0.2203	0.2733	0.2542	0.2712	0.214	0.2267	0.1907	0.2309	0.2733	0.2924	0.3369	0.4555	0.5763	0.6441	0.5953	0.5508	0.3962	0.3347
Fungi_Release38	fonsecaea_erecta	T	0.2627	0.2691	0.2627	0.2585	0.2458	0.2585	0.2373	0.2966	0.286	0.2754	0.2733	0.2648	0.2648	0.2585	0.2903	0.2458	0.2585	0.2585	0.2521	0.2564	0.2521	0.2331	0.2373	0.2288	0.2564	0.2521	0.2161	0.2203	0.2564	0.2712	0.2903	0.2733	0.2521	0.2945	0.2903	0.2839	0.286	0.2394	0.2225	0.2182	0.161	0.1229	0.1102	0.1208	0.0826	0.1716	0.0593
Fungi_Release38	metarhizium_anisopliae_brip_53293	A	0.2272	0.2272	0.1953	0.2187	0.2463	0.2739	0.2144	0.2611	0.2442	0.2505	0.2293	0.2463	0.2314	0.2123	0.2569	0.2654	0.2335	0.2442	0.2845	0.2314	0.2335	0.2845	0.2527	0.259	0.2951	0.2696	0.2696	0.2887	0.2675	0.2675	0.3057	0.2972	0.2718	0.2399	0.2803	0.2845	0.3312	0.3291	0.3015	0.2187	0.2484	0.2059	0.1635	0.1911	0.242	0.276	0.3992
Fungi_Release38	metarhizium_anisopliae_brip_53293	C	0.242	0.2463	0.2781	0.3121	0.2675	0.2845	0.2675	0.2378	0.2569	0.2399	0.2781	0.2675	0.2399	0.3015	0.2484	0.2272	0.2251	0.2654	0.2144	0.242	0.2633	0.2123	0.2017	0.2272	0.2081	0.2718	0.2102	0.2442	0.2208	0.2378	0.2059	0.2187	0.242	0.2505	0.2293	0.2781	0.2038	0.2335	0.1996	0.2527	0.155	0.1125	0.0955	0.1274	0.0892	0.1465	0.1168
Fungi_Release38	metarhizium_anisopliae_brip_53293	G	0.2144	0.2123	0.2527	0.2038	0.2463	0.189	0.2272	0.2229	0.2378	0.242	0.2102	0.2527	0.2208	0.2229	0.2293	0.2081	0.2696	0.2399	0.2272	0.2335	0.2696	0.2654	0.2654	0.259	0.2633	0.2293	0.2803	0.2527	0.2251	0.2166	0.2569	0.2059	0.2251	0.2123	0.1975	0.1868	0.1847	0.2442	0.2569	0.3206	0.4798	0.552	0.6412	0.569	0.5754	0.3928	0.4289
Fungi_Release38	metarhizium_anisopliae_brip_53293	T	0.3163	0.3142	0.2739	0.2654	0.2399	0.2527	0.2909	0.2781	0.2611	0.2675	0.2824	0.2335	0.3079	0.2633	0.2654	0.2994	0.2718	0.2505	0.2739	0.293	0.2335	0.2378	0.2803	0.2548	0.2335	0.2293	0.2399	0.2144	0.2866	0.2781	0.2314	0.2781	0.2611	0.2972	0.293	0.2505	0.2803	0.1932	0.242	0.2081	0.1168	0.1295	0.0998	0.1125	0.0934	0.1847	0.0552
Fungi_Release38	aspergillus_rambellii	A	0.2047	0.2026	0.2303	0.2154	0.2537	0.2345	0.2409	0.2345	0.2132	0.2217	0.2537	0.2324	0.2324	0.226	0.2665	0.2559	0.2559	0.2388	0.2367	0.2708	0.2516	0.2431	0.2452	0.2516	0.2878	0.2836	0.2601	0.2836	0.29	0.2431	0.2814	0.2644	0.2772	0.2964	0.2921	0.226	0.2878	0.2601	0.2751	0.2281	0.2452	0.162	0.1834	0.194	0.2281	0.3156	0.4627
Fungi_Release38	aspergillus_rambellii	C	0.2559	0.2516	0.2431	0.2537	0.2196	0.2431	0.2537	0.2388	0.2559	0.2644	0.29	0.2601	0.2388	0.2516	0.2068	0.258	0.2217	0.2281	0.2452	0.194	0.2132	0.2281	0.2111	0.2388	0.1962	0.2047	0.2132	0.1834	0.1919	0.2452	0.2175	0.2217	0.2111	0.2239	0.2431	0.2367	0.177	0.209	0.1898	0.2431	0.1493	0.1407	0.0746	0.0896	0.0704	0.0704	0.1066
Fungi_Release38	aspergillus_rambellii	G	0.2303	0.2047	0.2047	0.1962	0.1919	0.209	0.2154	0.2068	0.1962	0.1962	0.1727	0.2111	0.2004	0.2409	0.2111	0.2175	0.2324	0.2388	0.2154	0.2239	0.2495	0.2281	0.258	0.2495	0.2431	0.2388	0.2281	0.2239	0.2409	0.2409	0.2111	0.209	0.2068	0.2281	0.1962	0.2068	0.2409	0.2537	0.2644	0.3134	0.4542	0.5373	0.6311	0.5821	0.5906	0.3987	0.3454
Fungi_Release38	aspergillus_rambellii	T	0.3092	0.3412	0.322	0.3348	0.3348	0.3134	0.29	0.3198	0.3348	0.3177	0.2836	0.2964	0.3284	0.2814	0.3156	0.2687	0.29	0.2942	0.3028	0.3113	0.2857	0.3006	0.2857	0.2601	0.2729	0.2729	0.2985	0.3092	0.2772	0.2708	0.29	0.3049	0.3049	0.2516	0.2687	0.3305	0.2942	0.2772	0.2708	0.2154	0.1514	0.1599	0.1109	0.1343	0.1109	0.2154	0.0853
Fungi_Release38	trichophyton_tonsurans_cbs_112818	A	0.2793	0.2495	0.2857	0.2665	0.2324	0.2793	0.2751	0.2303	0.258	0.2217	0.2495	0.2559	0.2388	0.2814	0.2772	0.2452	0.2836	0.2729	0.2814	0.2878	0.3262	0.3284	0.3284	0.2985	0.339	0.3092	0.3113	0.3028	0.2708	0.322	0.2644	0.2601	0.2793	0.2878	0.2559	0.2857	0.2772	0.2985	0.2793	0.2132	0.2495	0.209	0.1834	0.2047	0.2431	0.3177	0.5416
Fungi_Release38	trichophyton_tonsurans_cbs_112818	C	0.2345	0.2516	0.2473	0.2409	0.258	0.2473	0.2154	0.226	0.2111	0.2431	0.2559	0.2367	0.2452	0.2281	0.2004	0.2026	0.2303	0.2175	0.177	0.1834	0.1812	0.177	0.1706	0.1983	0.2111	0.1684	0.1898	0.1834	0.2196	0.1727	0.2154	0.2154	0.209	0.1812	0.2644	0.1727	0.209	0.2026	0.2367	0.2217	0.1151	0.1215	0.0938	0.081	0.0682	0.0853	0.081
Fungi_Release38	trichophyton_tonsurans_cbs_112818	G	0.226	0.1962	0.1834	0.1919	0.2132	0.1855	0.2324	0.258	0.2217	0.1962	0.2196	0.226	0.2068	0.1962	0.2068	0.226	0.1962	0.2196	0.2559	0.2175	0.194	0.2345	0.2345	0.2004	0.209	0.2452	0.2217	0.2196	0.2217	0.226	0.2175	0.2154	0.2324	0.2281	0.1876	0.2068	0.2388	0.2324	0.2644	0.3156	0.5096	0.5608	0.6119	0.5565	0.5501	0.3902	0.2857
Fungi_Release38	trichophyton_tonsurans_cbs_112818	T	0.2601	0.3028	0.2836	0.3006	0.2964	0.2878	0.2772	0.2857	0.3092	0.339	0.2751	0.2814	0.3092	0.2942	0.3156	0.3262	0.29	0.29	0.2857	0.3113	0.2985	0.2601	0.2665	0.3028	0.2409	0.2772	0.2772	0.2942	0.2878	0.2793	0.3028	0.3092	0.2793	0.3028	0.2921	0.3348	0.2751	0.2665	0.2196	0.2495	0.1258	0.1087	0.1109	0.1578	0.1386	0.2068	0.0917
Fungi_Release38	colletotrichum_graminicola	A	0.1944	0.1859	0.2244	0.2073	0.2115	0.2244	0.2179	0.2393	0.2179	0.2137	0.2372	0.2457	0.203	0.2094	0.25	0.2393	0.2564	0.1923	0.2457	0.25	0.2863	0.2372	0.2436	0.2628	0.2457	0.2714	0.2714	0.2607	0.2521	0.2436	0.2479	0.2735	0.2564	0.2671	0.2415	0.2927	0.2842	0.3098	0.2821	0.1859	0.2051	0.1667	0.1774	0.1987	0.2201	0.3355	0.4722
Fungi_Release38	colletotrichum_graminicola	C	0.3162	0.2628	0.2543	0.2799	0.2863	0.297	0.2714	0.3056	0.2821	0.265	0.2906	0.2564	0.2885	0.2799	0.2821	0.2756	0.2607	0.2265	0.2692	0.265	0.2158	0.2308	0.2457	0.235	0.2564	0.2265	0.2436	0.2692	0.2628	0.2543	0.265	0.2179	0.2222	0.2628	0.2457	0.2842	0.2137	0.2244	0.2457	0.25	0.1432	0.1132	0.094	0.1282	0.1432	0.141	0.1154
Fungi_Release38	colletotrichum_graminicola	G	0.235	0.25	0.2415	0.2393	0.2714	0.2372	0.2521	0.2372	0.265	0.2521	0.2372	0.2457	0.2585	0.2799	0.2436	0.2222	0.265	0.3312	0.2821	0.2692	0.2564	0.265	0.2927	0.2564	0.2735	0.2756	0.2778	0.235	0.2393	0.2692	0.2415	0.2372	0.2906	0.2393	0.2415	0.2009	0.2393	0.25	0.2714	0.3675	0.5192	0.6239	0.6496	0.5598	0.5235	0.3632	0.3547
Fungi_Release38	colletotrichum_graminicola	T	0.2543	0.3013	0.2799	0.2735	0.2308	0.2415	0.2585	0.2179	0.235	0.2692	0.235	0.2521	0.25	0.2308	0.2244	0.2628	0.2179	0.25	0.203	0.2158	0.2415	0.2671	0.2179	0.2457	0.2244	0.2265	0.2073	0.235	0.2457	0.2329	0.2457	0.2714	0.2308	0.2308	0.2714	0.2222	0.2628	0.2158	0.2009	0.1966	0.1325	0.0962	0.0791	0.1132	0.1132	0.1603	0.0577
Fungi_Release38	phlebia_centrifuga	A	0.188	0.2286	0.2201	0.2137	0.203	0.2051	0.2115	0.2115	0.2286	0.2543	0.2372	0.2137	0.2115	0.2179	0.2372	0.2393	0.2222	0.2201	0.1923	0.2329	0.2521	0.2692	0.2671	0.2286	0.2735	0.2436	0.2415	0.2607	0.25	0.2094	0.2671	0.265	0.2778	0.2799	0.2564	0.2521	0.2564	0.2778	0.2372	0.1688	0.1838	0.1474	0.1752	0.1987	0.235	0.2115	0.4316
Fungi_Release38	phlebia_centrifuga	C	0.188	0.1752	0.2051	0.235	0.235	0.2201	0.2564	0.2756	0.2628	0.2308	0.2585	0.2521	0.2436	0.2372	0.2436	0.2521	0.2457	0.2308	0.2094	0.2372	0.2457	0.2308	0.2115	0.2415	0.1923	0.25	0.2479	0.235	0.2436	0.2094	0.2308	0.2115	0.2286	0.2094	0.2436	0.1966	0.1752	0.2201	0.2009	0.188	0.1026	0.0962	0.0791	0.1197	0.1004	0.1368	0.0598
Fungi_Release38	phlebia_centrifuga	G	0.2735	0.2179	0.203	0.1923	0.1944	0.203	0.1581	0.1859	0.1368	0.1688	0.1453	0.1624	0.1645	0.1902	0.141	0.1838	0.1774	0.1795	0.2222	0.2329	0.1731	0.2094	0.2009	0.2265	0.1838	0.188	0.188	0.1667	0.1581	0.2179	0.188	0.1816	0.1752	0.1517	0.1795	0.1795	0.2137	0.2179	0.2158	0.3291	0.5534	0.6325	0.5876	0.4701	0.5299	0.3953	0.4209
Fungi_Release38	phlebia_centrifuga	T	0.3504	0.3782	0.3718	0.359	0.3675	0.3718	0.3739	0.3269	0.3718	0.3462	0.359	0.3718	0.3803	0.3547	0.3782	0.3248	0.3547	0.3697	0.3761	0.297	0.3291	0.2906	0.3205	0.3034	0.3504	0.3184	0.3226	0.3376	0.3483	0.3632	0.3141	0.3419	0.3184	0.359	0.3205	0.3718	0.3547	0.2842	0.3462	0.3141	0.1603	0.1239	0.1581	0.2115	0.1346	0.2564	0.0876
Fungi_Release38	trichophyton_equinum_cbs_127_97	A	0.2756	0.2436	0.2756	0.265	0.2158	0.2842	0.2543	0.2244	0.2521	0.2115	0.2393	0.2607	0.2308	0.2735	0.2329	0.2564	0.2842	0.2393	0.3013	0.3162	0.2756	0.312	0.3291	0.2778	0.3269	0.2863	0.2906	0.3184	0.2821	0.3184	0.2714	0.2756	0.2863	0.2906	0.2692	0.2906	0.265	0.3098	0.2842	0.2179	0.2479	0.1987	0.1496	0.203	0.2415	0.3269	0.547
Fungi_Release38	trichophyton_equinum_cbs_127_97	C	0.2564	0.2479	0.2521	0.235	0.2778	0.2436	0.2415	0.25	0.2137	0.2479	0.2671	0.2457	0.2521	0.2372	0.2543	0.2179	0.2393	0.1987	0.1774	0.1774	0.1944	0.2051	0.1645	0.1902	0.2115	0.2051	0.1987	0.1795	0.2179	0.1923	0.2244	0.2137	0.1774	0.1795	0.2628	0.2009	0.2372	0.1944	0.2372	0.2308	0.1154	0.1004	0.0919	0.0748	0.0748	0.0726	0.0769
Fungi_Release38	trichophyton_equinum_cbs_127_97	G	0.2115	0.188	0.1987	0.1838	0.2286	0.1581	0.2244	0.2415	0.2179	0.2094	0.2137	0.2244	0.2073	0.1902	0.2158	0.2073	0.1902	0.2564	0.2564	0.203	0.2094	0.235	0.2308	0.2222	0.2265	0.2479	0.2158	0.2137	0.2244	0.2201	0.2009	0.2051	0.2436	0.2201	0.1838	0.2009	0.2222	0.2179	0.2692	0.3226	0.5085	0.5876	0.6474	0.562	0.562	0.3761	0.2799
Fungi_Release38	trichophyton_equinum_cbs_127_97	T	0.2564	0.3205	0.2735	0.3162	0.2778	0.3141	0.2799	0.2842	0.3162	0.3312	0.2799	0.2692	0.3098	0.2991	0.297	0.3184	0.2863	0.3056	0.265	0.3034	0.3205	0.2479	0.2756	0.3098	0.235	0.2607	0.2949	0.2885	0.2756	0.2692	0.3034	0.3056	0.2927	0.3098	0.2842	0.3077	0.2756	0.2778	0.2094	0.2286	0.1282	0.1132	0.1111	0.1603	0.1218	0.2244	0.0962
Fungi_Release38	aspergillus_niger_gca_001515345	A	0.2688	0.2301	0.243	0.2495	0.2452	0.2559	0.2108	0.2108	0.2215	0.2452	0.2581	0.2258	0.1978	0.2323	0.2409	0.228	0.2516	0.2387	0.2473	0.271	0.2688	0.2796	0.2645	0.3075	0.2409	0.2688	0.2839	0.2323	0.2925	0.2968	0.2753	0.2774	0.271	0.2925	0.2753	0.2559	0.2559	0.2989	0.2839	0.228	0.2538	0.1892	0.1828	0.2108	0.2366	0.2903	0.5054
Fungi_Release38	aspergillus_niger_gca_001515345	C	0.1892	0.2258	0.2258	0.2409	0.2473	0.2538	0.243	0.2688	0.2387	0.2409	0.2151	0.2452	0.2258	0.2409	0.2258	0.2086	0.2538	0.2108	0.1957	0.2043	0.2258	0.1484	0.1699	0.2215	0.1935	0.2129	0.2043	0.2194	0.1527	0.1892	0.1957	0.1785	0.1914	0.2	0.2108	0.2301	0.1849	0.1957	0.2	0.1892	0.1204	0.0882	0.0516	0.0624	0.0516	0.0796	0.086
Fungi_Release38	aspergillus_niger_gca_001515345	G	0.2538	0.1914	0.2129	0.1957	0.2452	0.228	0.1871	0.2129	0.1806	0.2065	0.2065	0.2086	0.2516	0.2495	0.2151	0.2602	0.2301	0.2688	0.2796	0.2323	0.2323	0.2774	0.2688	0.2473	0.243	0.2667	0.2301	0.228	0.2409	0.2731	0.2194	0.2559	0.2258	0.1978	0.2452	0.2215	0.243	0.2688	0.2495	0.3161	0.4817	0.5204	0.6022	0.557	0.6022	0.3677	0.3269
Fungi_Release38	aspergillus_niger_gca_001515345	T	0.2882	0.3527	0.3183	0.314	0.2624	0.2624	0.3591	0.3075	0.3591	0.3075	0.3204	0.3204	0.3247	0.2774	0.3183	0.3032	0.2645	0.2817	0.2774	0.2925	0.2731	0.2946	0.2968	0.2237	0.3226	0.2516	0.2817	0.3204	0.314	0.2409	0.3097	0.2882	0.3118	0.3097	0.2688	0.2925	0.3161	0.2366	0.2667	0.2667	0.1441	0.2022	0.1634	0.1699	0.1097	0.2624	0.0817
Fungi_Release38	diplodia_corticola	A	0.2215	0.1828	0.1957	0.1978	0.2	0.2108	0.2086	0.1806	0.1699	0.2409	0.1935	0.2344	0.1634	0.228	0.1935	0.2065	0.1914	0.1785	0.1935	0.2151	0.1957	0.2301	0.1957	0.2215	0.2495	0.2	0.2172	0.2409	0.2151	0.228	0.243	0.2237	0.2452	0.2366	0.2194	0.2086	0.2301	0.2903	0.2839	0.2022	0.2129	0.1484	0.1892	0.228	0.1978	0.2452	0.4086
Fungi_Release38	diplodia_corticola	C	0.2258	0.2194	0.2688	0.2731	0.2387	0.271	0.314	0.2796	0.286	0.2946	0.314	0.2882	0.2774	0.2817	0.2903	0.2581	0.2559	0.2602	0.2774	0.2409	0.2602	0.2366	0.286	0.2473	0.2151	0.2323	0.2344	0.2301	0.2667	0.2495	0.2559	0.271	0.2344	0.2258	0.2774	0.271	0.2151	0.2258	0.2215	0.2753	0.1656	0.1398	0.0817	0.1226	0.1505	0.1806	0.0925
Fungi_Release38	diplodia_corticola	G	0.286	0.3011	0.2753	0.2839	0.286	0.2237	0.2387	0.2667	0.2667	0.2538	0.2624	0.2301	0.2602	0.2645	0.2645	0.2839	0.2989	0.2839	0.2968	0.3376	0.2925	0.2882	0.2903	0.3376	0.314	0.3183	0.3333	0.3118	0.2839	0.2882	0.2731	0.2409	0.2731	0.2882	0.2645	0.2452	0.2753	0.2602	0.3011	0.3677	0.4882	0.6022	0.6473	0.5226	0.5613	0.4043	0.4473
Fungi_Release38	diplodia_corticola	T	0.2667	0.2968	0.2602	0.2452	0.2753	0.2946	0.2387	0.2731	0.2774	0.2108	0.2301	0.2473	0.2989	0.2258	0.2516	0.2516	0.2538	0.2774	0.2323	0.2065	0.2516	0.2452	0.228	0.1935	0.2215	0.2495	0.2151	0.2172	0.2344	0.2344	0.228	0.2645	0.2473	0.2495	0.2387	0.2753	0.2796	0.2237	0.1935	0.1548	0.1333	0.1097	0.0817	0.1269	0.0903	0.1699	0.0516
Fungi_Release38	fonsecaea_multimorphosa_cbs_102226	A	0.2602	0.2473	0.228	0.2043	0.1871	0.1978	0.2323	0.2086	0.2258	0.2645	0.2409	0.1957	0.271	0.2473	0.2258	0.2258	0.2538	0.2753	0.2581	0.2688	0.2344	0.2495	0.2108	0.2129	0.2645	0.271	0.2108	0.243	0.2688	0.2495	0.2495	0.2581	0.2473	0.2108	0.228	0.2387	0.271	0.2946	0.2925	0.2151	0.2022	0.1914	0.2022	0.2753	0.2516	0.3312	0.4452
Fungi_Release38	fonsecaea_multimorphosa_cbs_102226	C	0.2344	0.2172	0.2387	0.2344	0.2473	0.3097	0.2602	0.3032	0.286	0.2366	0.2774	0.2989	0.2344	0.2624	0.2667	0.2409	0.2495	0.2258	0.2581	0.2043	0.2194	0.2022	0.2538	0.243	0.2258	0.2301	0.2495	0.2151	0.2129	0.3075	0.2022	0.2129	0.2129	0.2559	0.2409	0.2495	0.1957	0.243	0.2086	0.2194	0.1441	0.1075	0.0882	0.071	0.0946	0.1204	0.1376
Fungi_Release38	fonsecaea_multimorphosa_cbs_102226	G	0.2387	0.2366	0.2409	0.2495	0.2731	0.2301	0.2129	0.2366	0.2215	0.2129	0.2108	0.2473	0.1978	0.2194	0.228	0.2688	0.2258	0.2624	0.2323	0.286	0.286	0.2968	0.2624	0.2796	0.2344	0.2473	0.286	0.271	0.2753	0.2043	0.2452	0.2258	0.2559	0.1978	0.2065	0.2215	0.271	0.2215	0.2624	0.3419	0.5075	0.5591	0.6086	0.5161	0.5527	0.3742	0.329
Fungi_Release38	fonsecaea_multimorphosa_cbs_102226	T	0.2667	0.2989	0.2925	0.3118	0.2925	0.2624	0.2946	0.2516	0.2667	0.286	0.271	0.2581	0.2968	0.271	0.2796	0.2645	0.271	0.2366	0.2516	0.2409	0.2602	0.2516	0.2731	0.2645	0.2753	0.2516	0.2538	0.271	0.243	0.2387	0.3032	0.3032	0.2839	0.3355	0.3247	0.2903	0.2624	0.2409	0.2366	0.2237	0.1462	0.1419	0.1011	0.1376	0.1011	0.1742	0.0882
Fungi_Release38	metarhizium_anisopliae_brip_53284	A	0.2323	0.228	0.1978	0.2172	0.2366	0.2753	0.2129	0.2538	0.243	0.2581	0.2387	0.2495	0.2344	0.2151	0.2581	0.2753	0.2301	0.2495	0.2796	0.2237	0.2258	0.2882	0.2538	0.2602	0.2946	0.2624	0.2731	0.2796	0.2602	0.2645	0.3032	0.2989	0.2753	0.2495	0.2796	0.271	0.3226	0.3269	0.2968	0.2151	0.2516	0.2215	0.1613	0.1914	0.243	0.2753	0.4
Fungi_Release38	metarhizium_anisopliae_brip_53284	C	0.2323	0.2473	0.271	0.314	0.2774	0.286	0.2645	0.228	0.2581	0.2366	0.2796	0.2602	0.228	0.3011	0.2538	0.2301	0.2301	0.2624	0.2172	0.243	0.2559	0.2151	0.1935	0.2237	0.2129	0.2753	0.2108	0.2366	0.2215	0.243	0.2108	0.2108	0.2387	0.2495	0.2366	0.2817	0.1978	0.2366	0.2086	0.2473	0.1527	0.1161	0.0968	0.1226	0.0946	0.1484	0.1183
Fungi_Release38	metarhizium_anisopliae_brip_53284	G	0.2086	0.2108	0.2602	0.1978	0.2452	0.1849	0.228	0.228	0.2452	0.2344	0.1935	0.2581	0.228	0.2194	0.2323	0.2043	0.271	0.2387	0.2301	0.2409	0.2774	0.2602	0.271	0.2581	0.2602	0.2301	0.2731	0.2538	0.2258	0.2194	0.2559	0.2043	0.2323	0.2108	0.1871	0.1957	0.1978	0.2452	0.2516	0.3183	0.4688	0.5441	0.6366	0.572	0.572	0.3892	0.428
Fungi_Release38	metarhizium_anisopliae_brip_53284	T	0.3269	0.314	0.271	0.271	0.2409	0.2538	0.2946	0.2903	0.2538	0.271	0.2882	0.2323	0.3097	0.2645	0.2559	0.2903	0.2688	0.2495	0.2731	0.2925	0.2409	0.2366	0.2817	0.2581	0.2323	0.2323	0.243	0.2301	0.2925	0.2731	0.2301	0.286	0.2538	0.2903	0.2968	0.2516	0.2817	0.1914	0.243	0.2194	0.1269	0.1183	0.1054	0.114	0.0903	0.1871	0.0538
Fungi_Release38	aspergillus_nidulans_fgsc_a4	A	0.2052	0.2095	0.2009	0.2397	0.2419	0.2311	0.1944	0.2203	0.2225	0.2203	0.2354	0.2397	0.2592	0.2311	0.2419	0.2311	0.2873	0.2765	0.2333	0.2743	0.2657	0.2721	0.2462	0.2484	0.2851	0.2527	0.2808	0.2981	0.2808	0.2311	0.2765	0.2894	0.2765	0.2894	0.2981	0.2808	0.2721	0.3153	0.3045	0.2268	0.3045	0.1793	0.1728	0.2117	0.1857	0.27	0.4406
Fungi_Release38	aspergillus_nidulans_fgsc_a4	C	0.2484	0.2527	0.2613	0.2441	0.2397	0.27	0.2765	0.2203	0.257	0.2829	0.2549	0.2333	0.2678	0.2311	0.2829	0.2397	0.2527	0.2354	0.2268	0.2462	0.2225	0.2333	0.2246	0.2138	0.2138	0.2117	0.203	0.2052	0.257	0.2462	0.2117	0.2225	0.2052	0.2289	0.2052	0.2181	0.2203	0.2203	0.1814	0.2009	0.108	0.1123	0.1102	0.095	0.0864	0.0756	0.1123
Fungi_Release38	aspergillus_nidulans_fgsc_a4	G	0.2419	0.2743	0.2203	0.2462	0.2289	0.2397	0.2073	0.2419	0.1879	0.1749	0.1836	0.1836	0.2052	0.2311	0.2073	0.2095	0.1987	0.2268	0.2462	0.2138	0.2333	0.2311	0.2549	0.2592	0.2462	0.2635	0.2268	0.2311	0.2397	0.2354	0.2289	0.1987	0.1922	0.1814	0.1944	0.1685	0.2268	0.2268	0.2311	0.3261	0.4363	0.5313	0.5896	0.5356	0.5745	0.4298	0.378
Fungi_Release38	aspergillus_nidulans_fgsc_a4	T	0.3045	0.2635	0.3175	0.27	0.2894	0.2592	0.3218	0.3175	0.3326	0.3218	0.3261	0.3434	0.2678	0.3067	0.2678	0.3197	0.2613	0.2613	0.2937	0.2657	0.2786	0.2635	0.2743	0.2786	0.2549	0.2721	0.2894	0.2657	0.2225	0.2873	0.2829	0.2894	0.3261	0.3002	0.3024	0.3326	0.2808	0.2376	0.2829	0.2462	0.1512	0.1771	0.1274	0.1577	0.1533	0.2246	0.0691
Fungi_Release38	metarhizium_robertsii	A	0.2576	0.2294	0.2316	0.2251	0.2381	0.2532	0.2208	0.2294	0.2381	0.2879	0.2641	0.2338	0.2338	0.197	0.2792	0.2814	0.2641	0.2662	0.2857	0.2597	0.2381	0.2576	0.29	0.2619	0.3074	0.2403	0.2879	0.2987	0.2814	0.2641	0.2641	0.329	0.2597	0.2706	0.2792	0.2835	0.2835	0.3117	0.2857	0.2035	0.2359	0.1818	0.1861	0.2532	0.2597	0.3009	0.3983
Fungi_Release38	metarhizium_robertsii	C	0.2727	0.2554	0.2684	0.2792	0.2944	0.2835	0.2727	0.2489	0.2532	0.2294	0.2814	0.2273	0.2229	0.29	0.2576	0.2078	0.2359	0.2165	0.2165	0.2446	0.2359	0.2294	0.2078	0.184	0.2013	0.2706	0.197	0.2121	0.2121	0.2403	0.2035	0.21	0.2576	0.2511	0.2251	0.2489	0.2294	0.2121	0.2143	0.2273	0.1364	0.0952	0.0996	0.1126	0.1082	0.1385	0.132
Fungi_Release38	metarhizium_robertsii	G	0.2013	0.2424	0.2381	0.2143	0.2165	0.1991	0.2446	0.2641	0.2554	0.2186	0.1926	0.2576	0.2424	0.2338	0.2294	0.2165	0.2576	0.2532	0.2035	0.2403	0.2749	0.2749	0.2489	0.316	0.2597	0.2273	0.2554	0.2208	0.2554	0.2186	0.2511	0.1818	0.2316	0.197	0.2165	0.197	0.2035	0.2511	0.2641	0.3398	0.5	0.5996	0.6126	0.5065	0.526	0.3636	0.4069
Fungi_Release38	metarhizium_robertsii	T	0.2684	0.2727	0.2619	0.2814	0.2511	0.2641	0.2619	0.2576	0.2532	0.2641	0.2619	0.2814	0.3009	0.2792	0.2338	0.2944	0.2424	0.2641	0.2944	0.2554	0.2511	0.2381	0.2532	0.2381	0.2316	0.2619	0.2597	0.2684	0.2511	0.2771	0.2814	0.2792	0.2511	0.2814	0.2792	0.2706	0.2835	0.2251	0.2359	0.2294	0.1277	0.1234	0.1017	0.1277	0.1061	0.197	0.0628
Fungi_Release38	ustilaginoidea_virens	A	0.1952	0.2039	0.1735	0.18	0.18	0.2148	0.2213	0.2082	0.1735	0.1692	0.2017	0.1779	0.1627	0.2017	0.1866	0.2364	0.2386	0.2104	0.2061	0.1952	0.243	0.2082	0.2191	0.2538	0.2213	0.2451	0.2321	0.2321	0.2126	0.2299	0.1844	0.2017	0.1974	0.2148	0.2451	0.2213	0.256	0.2256	0.2408	0.1236	0.18	0.1887	0.1996	0.1909	0.2668	0.3189	0.3709
Fungi_Release38	ustilaginoidea_virens	C	0.3037	0.2516	0.308	0.2777	0.2581	0.2842	0.3037	0.282	0.2993	0.3015	0.2777	0.308	0.2907	0.2798	0.2408	0.256	0.2733	0.269	0.269	0.2863	0.2451	0.2646	0.2408	0.243	0.2755	0.2299	0.2733	0.2885	0.2516	0.2668	0.2907	0.2885	0.2451	0.2625	0.256	0.295	0.2148	0.2842	0.2495	0.2451	0.1497	0.1475	0.0998	0.128	0.1302	0.1518	0.1388
Fungi_Release38	ustilaginoidea_virens	G	0.2473	0.3102	0.243	0.2625	0.3015	0.269	0.2364	0.256	0.256	0.256	0.2711	0.2798	0.2885	0.2711	0.3037	0.2646	0.2538	0.3124	0.2603	0.269	0.2863	0.282	0.2993	0.2603	0.282	0.2907	0.2885	0.2451	0.2885	0.2733	0.2473	0.243	0.2928	0.2668	0.2473	0.243	0.2798	0.3015	0.3341	0.4208	0.5965	0.5879	0.6312	0.5597	0.5315	0.3536	0.4295
Fungi_Release38	ustilaginoidea_virens	T	0.2538	0.2343	0.2755	0.2798	0.2603	0.2321	0.2386	0.2538	0.2711	0.2733	0.2495	0.2343	0.2581	0.2473	0.269	0.243	0.2343	0.2082	0.2646	0.2495	0.2256	0.2451	0.2408	0.243	0.2213	0.2343	0.2061	0.2343	0.2473	0.2299	0.2777	0.2668	0.2646	0.256	0.2516	0.2408	0.2495	0.1887	0.1757	0.2104	0.0738	0.0759	0.0694	0.1215	0.0716	0.1757	0.0607
Fungi_Release38	aspergillus_oryzae_100_8	A	0.263	0.2326	0.237	0.2478	0.2435	0.2109	0.2457	0.2261	0.2261	0.2717	0.2196	0.2261	0.2457	0.2543	0.2239	0.2739	0.2913	0.237	0.2435	0.2696	0.2696	0.2543	0.2935	0.2804	0.2674	0.3304	0.2891	0.3261	0.2913	0.2761	0.2739	0.2739	0.25	0.3022	0.2935	0.2587	0.2565	0.3196	0.2522	0.2283	0.2761	0.2261	0.1804	0.2	0.237	0.2717	0.4891
Fungi_Release38	aspergillus_oryzae_100_8	C	0.1913	0.213	0.237	0.2543	0.2087	0.2543	0.237	0.2652	0.2587	0.237	0.2652	0.25	0.2783	0.2	0.2543	0.2217	0.2609	0.2587	0.1935	0.2	0.2283	0.1935	0.1783	0.213	0.2043	0.1935	0.1848	0.187	0.2022	0.2043	0.2587	0.1935	0.2304	0.213	0.2283	0.2	0.2283	0.2043	0.2261	0.1891	0.1196	0.1109	0.0783	0.0913	0.087	0.0891	0.0935
Fungi_Release38	aspergillus_oryzae_100_8	G	0.2413	0.2326	0.1978	0.1957	0.2043	0.2217	0.2	0.1935	0.1891	0.1674	0.2	0.2087	0.2065	0.2304	0.2326	0.2174	0.1717	0.2587	0.2587	0.2304	0.2217	0.2783	0.25	0.2696	0.237	0.2174	0.2609	0.2239	0.2217	0.2522	0.213	0.213	0.2435	0.1913	0.2	0.2239	0.2478	0.2283	0.2543	0.3326	0.4413	0.5304	0.5826	0.5739	0.5587	0.3978	0.3109
Fungi_Release38	aspergillus_oryzae_100_8	T	0.3043	0.3217	0.3283	0.3022	0.3435	0.313	0.3174	0.3152	0.3261	0.3239	0.3152	0.3152	0.2696	0.3152	0.2891	0.287	0.2761	0.2457	0.3043	0.3	0.2804	0.2739	0.2783	0.237	0.2913	0.2587	0.2652	0.263	0.2848	0.2674	0.2543	0.3196	0.2761	0.2935	0.2783	0.3174	0.2674	0.2478	0.2674	0.25	0.163	0.1326	0.1587	0.1348	0.1174	0.2413	0.1065
Fungi_Release38	aspergillus_oryzae_3_042	A	0.2582	0.2276	0.2341	0.2538	0.2298	0.2232	0.2407	0.2232	0.2232	0.2691	0.2166	0.2319	0.2451	0.2495	0.2276	0.2735	0.2845	0.2319	0.2429	0.2626	0.2779	0.256	0.2932	0.2801	0.256	0.3304	0.291	0.3173	0.2888	0.2735	0.267	0.2626	0.256	0.302	0.2998	0.2604	0.2538	0.3151	0.2451	0.2407	0.2713	0.2232	0.1751	0.1947	0.2341	0.2845	0.4923
Fungi_Release38	aspergillus_oryzae_3_042	C	0.1904	0.221	0.2385	0.2495	0.221	0.2429	0.2451	0.2604	0.2582	0.2385	0.2823	0.2407	0.2735	0.2057	0.2451	0.2188	0.2582	0.2604	0.186	0.2035	0.221	0.1904	0.1794	0.2166	0.2057	0.1926	0.1794	0.186	0.1926	0.2035	0.2582	0.1947	0.2276	0.2079	0.2276	0.1969	0.2298	0.2123	0.2298	0.1794	0.1204	0.105	0.0832	0.0919	0.0832	0.0853	0.0941
Fungi_Release38	aspergillus_oryzae_3_042	G	0.2451	0.2385	0.1991	0.2079	0.2079	0.2166	0.1926	0.1904	0.1947	0.1707	0.1947	0.2057	0.2079	0.2298	0.2407	0.2276	0.1729	0.2538	0.2626	0.2276	0.221	0.2757	0.2516	0.2735	0.2451	0.2232	0.2648	0.2232	0.2188	0.2538	0.2166	0.2144	0.2473	0.2057	0.1991	0.2123	0.2407	0.2166	0.2604	0.3304	0.4464	0.5339	0.5886	0.5755	0.5646	0.3939	0.3085
Fungi_Release38	aspergillus_oryzae_3_042	T	0.3063	0.3129	0.3282	0.2888	0.3414	0.3173	0.3217	0.326	0.3239	0.3217	0.3063	0.3217	0.2735	0.3151	0.2867	0.2801	0.2845	0.2538	0.3085	0.3063	0.2801	0.2779	0.2757	0.2298	0.2932	0.2538	0.2648	0.2735	0.2998	0.2691	0.2582	0.3282	0.2691	0.2845	0.2735	0.3304	0.2757	0.256	0.2648	0.2495	0.1619	0.1379	0.1532	0.1379	0.1182	0.2363	0.105
Fungi_Release38	colletotrichum_sublineola	A	0.2004	0.1938	0.2269	0.2048	0.2291	0.2555	0.2379	0.2423	0.2423	0.2489	0.2401	0.207	0.2115	0.2445	0.2203	0.2599	0.2423	0.2357	0.2555	0.2665	0.2709	0.2687	0.2687	0.2511	0.304	0.2577	0.2357	0.2952	0.2687	0.2445	0.2467	0.2379	0.2423	0.2709	0.2445	0.2533	0.2952	0.3348	0.2907	0.2467	0.2511	0.1564	0.1828	0.207	0.2401	0.2797	0.4493
Fungi_Release38	colletotrichum_sublineola	C	0.2401	0.2687	0.2841	0.2863	0.2401	0.2819	0.304	0.2709	0.2819	0.2599	0.2687	0.2599	0.2797	0.2533	0.2885	0.2247	0.2599	0.2335	0.2269	0.196	0.1806	0.2379	0.2511	0.2687	0.2048	0.2313	0.2401	0.2115	0.2335	0.2555	0.2599	0.2775	0.2159	0.2599	0.2797	0.2974	0.2093	0.2115	0.2841	0.2489	0.1784	0.1322	0.0991	0.0837	0.1432	0.1564	0.1145
Fungi_Release38	colletotrichum_sublineola	G	0.2709	0.2753	0.207	0.2291	0.2996	0.2489	0.2357	0.2357	0.2577	0.2885	0.2401	0.2379	0.2731	0.2841	0.2159	0.2533	0.2401	0.2797	0.2467	0.2907	0.2753	0.2665	0.2599	0.2687	0.2599	0.2819	0.293	0.2621	0.2533	0.2291	0.2379	0.2313	0.2599	0.2225	0.2181	0.2048	0.2379	0.2313	0.2269	0.2885	0.4604	0.6145	0.641	0.5617	0.5066	0.4141	0.3855
Fungi_Release38	colletotrichum_sublineola	T	0.2885	0.2621	0.2819	0.2797	0.2313	0.2137	0.2225	0.2511	0.2181	0.2026	0.2511	0.2952	0.2357	0.2181	0.2753	0.2621	0.2577	0.2511	0.2709	0.2467	0.2731	0.2269	0.2203	0.2115	0.2313	0.2291	0.2313	0.2313	0.2445	0.2709	0.2555	0.2533	0.2819	0.2467	0.2577	0.2445	0.2577	0.2225	0.1982	0.2159	0.1101	0.0969	0.0771	0.1476	0.1101	0.1498	0.0507
Fungi_Release38	stachybotrys_chlorohalonata_ibt_40285	A	0.2203	0.1916	0.207	0.2093	0.2291	0.2093	0.2115	0.2203	0.2335	0.2357	0.2159	0.2357	0.174	0.196	0.2269	0.1982	0.2225	0.2093	0.2181	0.2115	0.2423	0.2115	0.2621	0.2467	0.2467	0.2996	0.2621	0.2357	0.2731	0.2291	0.2291	0.2599	0.2313	0.2665	0.2445	0.2555	0.2841	0.3304	0.2753	0.2026	0.2379	0.1784	0.1454	0.1454	0.2313	0.2952	0.4251
Fungi_Release38	stachybotrys_chlorohalonata_ibt_40285	C	0.2489	0.2665	0.2379	0.2819	0.2357	0.2907	0.2996	0.2819	0.3062	0.2907	0.2775	0.2775	0.2489	0.2731	0.2775	0.2907	0.2489	0.2731	0.2599	0.2159	0.2357	0.2643	0.207	0.2247	0.1938	0.2093	0.196	0.2313	0.2313	0.2159	0.2357	0.2269	0.2247	0.2225	0.2379	0.2599	0.2269	0.207	0.2599	0.2533	0.1256	0.1233	0.0969	0.0991	0.0903	0.13	0.0969
Fungi_Release38	stachybotrys_chlorohalonata_ibt_40285	G	0.2952	0.2313	0.2841	0.2379	0.2863	0.2247	0.2357	0.2335	0.2093	0.2181	0.2291	0.2533	0.2797	0.2511	0.2335	0.2247	0.2555	0.2687	0.2555	0.2952	0.2996	0.2797	0.2753	0.2797	0.3194	0.2511	0.2665	0.2952	0.2577	0.2996	0.2577	0.2489	0.2621	0.2247	0.2335	0.185	0.1982	0.2467	0.2335	0.3172	0.4978	0.5683	0.6696	0.6013	0.5749	0.3811	0.4119
Fungi_Release38	stachybotrys_chlorohalonata_ibt_40285	T	0.2357	0.3106	0.2709	0.2709	0.2489	0.2753	0.2533	0.2643	0.2511	0.2555	0.2775	0.2335	0.2974	0.2797	0.2621	0.2863	0.2731	0.2489	0.2665	0.2775	0.2225	0.2445	0.2555	0.2489	0.2401	0.2401	0.2753	0.2379	0.2379	0.2555	0.2775	0.2643	0.2819	0.2863	0.2841	0.2996	0.2907	0.2159	0.2313	0.2269	0.1388	0.13	0.0881	0.1542	0.1035	0.1938	0.0661
Fungi_Release38	aspergillus_ochraceoroseus	A	0.2384	0.1943	0.2141	0.2053	0.2561	0.223	0.245	0.2274	0.2384	0.223	0.2252	0.2119	0.2649	0.2384	0.2627	0.2826	0.2561	0.2274	0.2517	0.2715	0.2539	0.2406	0.2627	0.2605	0.287	0.2781	0.2472	0.2583	0.2693	0.2362	0.2693	0.2472	0.2848	0.2693	0.287	0.2428	0.2737	0.2583	0.2848	0.2296	0.2561	0.1611	0.17	0.1965	0.2472	0.3311	0.4636
Fungi_Release38	aspergillus_ochraceoroseus	C	0.2428	0.2384	0.2671	0.2627	0.2185	0.2428	0.2406	0.2539	0.2583	0.2384	0.3223	0.2561	0.2185	0.2406	0.2274	0.2583	0.2252	0.2406	0.2208	0.1965	0.2141	0.2318	0.2097	0.2274	0.2075	0.2318	0.2141	0.2075	0.1854	0.2296	0.2053	0.2163	0.2274	0.2362	0.2605	0.223	0.1854	0.2163	0.1832	0.234	0.1545	0.1347	0.0773	0.0905	0.0795	0.0817	0.1015
Fungi_Release38	aspergillus_ochraceoroseus	G	0.2009	0.1965	0.2185	0.2009	0.2053	0.2119	0.2163	0.1987	0.1921	0.2208	0.1678	0.2141	0.2053	0.2406	0.2119	0.2075	0.2318	0.2472	0.2097	0.2362	0.2274	0.2185	0.2428	0.2362	0.2163	0.245	0.2428	0.2163	0.2627	0.2605	0.2053	0.2318	0.2119	0.2163	0.1965	0.2208	0.2539	0.2605	0.2715	0.3179	0.4437	0.5651	0.66	0.5828	0.574	0.3731	0.3289
Fungi_Release38	aspergillus_ochraceoroseus	T	0.3179	0.3709	0.3002	0.3311	0.3201	0.3223	0.298	0.3201	0.3113	0.3179	0.2848	0.3179	0.3113	0.2804	0.298	0.2517	0.287	0.2848	0.3179	0.2958	0.3046	0.3091	0.2848	0.2759	0.2892	0.245	0.2958	0.3179	0.2826	0.2737	0.3201	0.3046	0.2759	0.2781	0.2561	0.3135	0.287	0.2649	0.2605	0.2185	0.1457	0.1391	0.0927	0.1302	0.0993	0.2141	0.106
Fungi_Release38	penicilliopsis_zonata_cbs_506_65	A	0.2345	0.2699	0.2345	0.2389	0.2345	0.2434	0.2721	0.219	0.2301	0.2743	0.2544	0.2611	0.25	0.2765	0.1947	0.2721	0.2301	0.2611	0.281	0.2655	0.2345	0.281	0.2699	0.2898	0.2832	0.2788	0.2721	0.2367	0.2389	0.2898	0.2721	0.3009	0.2721	0.2434	0.25	0.2633	0.2765	0.2544	0.2212	0.2478	0.2765	0.292	0.2412	0.1881	0.2389	0.3009	0.4823
Fungi_Release38	penicilliopsis_zonata_cbs_506_65	C	0.2212	0.2102	0.2146	0.2168	0.2699	0.2124	0.2876	0.25	0.2102	0.2345	0.2301	0.2389	0.2389	0.2367	0.2323	0.2058	0.2345	0.1726	0.2301	0.2367	0.1792	0.1858	0.2279	0.1881	0.2058	0.1969	0.2102	0.2301	0.2323	0.1991	0.2124	0.1947	0.2124	0.2478	0.2124	0.2013	0.1991	0.2146	0.2235	0.146	0.1394	0.0973	0.1106	0.0885	0.0664	0.073	0.0973
Fungi_Release38	penicilliopsis_zonata_cbs_506_65	G	0.1925	0.2168	0.2389	0.219	0.2212	0.2456	0.1925	0.2058	0.2478	0.2013	0.208	0.2412	0.2124	0.2058	0.2235	0.2323	0.2345	0.2699	0.2013	0.2345	0.2876	0.2677	0.2235	0.2743	0.2345	0.2301	0.2323	0.2345	0.2478	0.2146	0.2168	0.2013	0.2102	0.1903	0.2389	0.2434	0.2876	0.2699	0.2788	0.3562	0.4314	0.4801	0.5265	0.5752	0.5863	0.4558	0.3473
Fungi_Release38	penicilliopsis_zonata_cbs_506_65	T	0.3518	0.3031	0.3119	0.3252	0.2743	0.2987	0.2478	0.3252	0.3119	0.2898	0.3075	0.2588	0.2987	0.281	0.3496	0.2898	0.3009	0.2965	0.2876	0.2633	0.2987	0.2655	0.2788	0.2478	0.2765	0.2942	0.2854	0.2987	0.281	0.2965	0.2987	0.3031	0.3053	0.3186	0.2987	0.292	0.2367	0.2611	0.2765	0.25	0.1527	0.1305	0.1217	0.1482	0.1084	0.1704	0.073
Fungi_Release38	trichoderma_reesei_rut_c_30	A	0.2212	0.2522	0.2035	0.2655	0.2434	0.219	0.2544	0.2389	0.2146	0.2412	0.2633	0.2456	0.2323	0.2301	0.2367	0.2677	0.2035	0.2235	0.2788	0.2323	0.2588	0.2854	0.2765	0.2633	0.2788	0.208	0.25	0.2588	0.2434	0.2323	0.2677	0.2102	0.2611	0.2611	0.2743	0.2456	0.3119	0.2876	0.2522	0.1991	0.2146	0.177	0.2301	0.2367	0.2942	0.3119	0.4336
Fungi_Release38	trichoderma_reesei_rut_c_30	C	0.2345	0.2655	0.2544	0.2633	0.2721	0.25	0.2434	0.2655	0.2655	0.2655	0.2235	0.2456	0.2522	0.2235	0.2257	0.2013	0.2389	0.2323	0.1903	0.2235	0.1947	0.2058	0.1748	0.2102	0.208	0.2168	0.2367	0.2345	0.2257	0.2124	0.219	0.2323	0.2412	0.2345	0.2456	0.2323	0.2013	0.2035	0.2677	0.208	0.1305	0.0973	0.0951	0.1084	0.1327	0.1128	0.135
Fungi_Release38	trichoderma_reesei_rut_c_30	G	0.292	0.2788	0.2655	0.219	0.2588	0.292	0.2058	0.2633	0.2677	0.2279	0.2743	0.2677	0.2412	0.2854	0.2854	0.2035	0.3252	0.3208	0.2721	0.2788	0.3097	0.2832	0.3097	0.3097	0.2965	0.3274	0.3208	0.2765	0.2699	0.3186	0.2677	0.2655	0.2765	0.2588	0.208	0.2522	0.2544	0.3119	0.3009	0.354	0.5066	0.6084	0.5929	0.5398	0.4668	0.4115	0.3827
Fungi_Release38	trichoderma_reesei_rut_c_30	T	0.2522	0.2035	0.2765	0.2522	0.2257	0.2389	0.2965	0.2323	0.2522	0.2655	0.2389	0.2412	0.2743	0.2611	0.2522	0.3274	0.2323	0.2235	0.2588	0.2655	0.2367	0.2257	0.2389	0.2168	0.2168	0.2478	0.1925	0.2301	0.2611	0.2367	0.2456	0.292	0.2212	0.2456	0.2721	0.2699	0.2323	0.1969	0.1792	0.2389	0.1482	0.1173	0.0819	0.115	0.1062	0.1637	0.0487
Fungi_Release38	escovopsis_weberi	A	0.2195	0.1663	0.184	0.2217	0.2129	0.2373	0.2284	0.2417	0.2129	0.2328	0.1929	0.1818	0.2217	0.2461	0.2106	0.2417	0.2195	0.2151	0.2727	0.2594	0.2195	0.2528	0.235	0.2106	0.2129	0.2395	0.204	0.2395	0.2195	0.2262	0.2328	0.2239	0.2018	0.2217	0.2195	0.1951	0.2151	0.2217	0.2062	0.184	0.2217	0.1552	0.2217	0.184	0.2173	0.2705	0.357
Fungi_Release38	escovopsis_weberi	C	0.3149	0.2882	0.3193	0.2882	0.255	0.2616	0.2439	0.3082	0.255	0.2927	0.2949	0.2749	0.2461	0.2772	0.2417	0.2417	0.2417	0.2062	0.2373	0.2306	0.2639	0.2483	0.2506	0.2062	0.255	0.2262	0.2594	0.2284	0.2417	0.2262	0.2439	0.2506	0.2705	0.2373	0.2461	0.2882	0.2838	0.2439	0.2794	0.2661	0.1463	0.1441	0.1242	0.1596	0.0998	0.1353	0.1175
Fungi_Release38	escovopsis_weberi	G	0.2439	0.2749	0.2949	0.2727	0.2816	0.255	0.2905	0.2594	0.2661	0.2395	0.2528	0.3326	0.2971	0.2661	0.306	0.2772	0.3016	0.3282	0.2971	0.2905	0.306	0.3016	0.2816	0.3592	0.3326	0.3459	0.3215	0.2949	0.2905	0.3126	0.2905	0.3171	0.2949	0.3126	0.3082	0.2749	0.2705	0.3326	0.337	0.3836	0.51	0.5942	0.5676	0.5366	0.6142	0.4834	0.4656
Fungi_Release38	escovopsis_weberi	T	0.2217	0.2705	0.2018	0.2173	0.2506	0.2461	0.2373	0.1907	0.2661	0.235	0.2594	0.2106	0.235	0.2106	0.2417	0.2395	0.2373	0.2506	0.1929	0.2195	0.2106	0.1973	0.2328	0.2239	0.1996	0.1885	0.2151	0.2373	0.2483	0.235	0.2328	0.2084	0.2328	0.2284	0.2262	0.2417	0.2306	0.2018	0.1774	0.1663	0.122	0.1064	0.0865	0.1197	0.0687	0.1109	0.0599
Fungi_Release38	aspergillus_flavus	A	0.2272	0.1938	0.2383	0.2405	0.2094	0.2249	0.2539	0.2517	0.2116	0.2294	0.2116	0.2472	0.2071	0.2717	0.2249	0.2717	0.2829	0.2494	0.2405	0.2784	0.265	0.2405	0.2851	0.2984	0.2428	0.3229	0.2739	0.3185	0.2584	0.245	0.2784	0.2628	0.2628	0.3073	0.265	0.2361	0.2695	0.3408	0.2561	0.2294	0.2294	0.1737	0.1938	0.216	0.2806	0.2851	0.4677
Fungi_Release38	aspergillus_flavus	C	0.1804	0.2138	0.2383	0.2494	0.2094	0.2428	0.2361	0.265	0.2361	0.2517	0.2628	0.2272	0.2584	0.2205	0.2205	0.1893	0.2249	0.2339	0.2049	0.2027	0.2138	0.1871	0.1938	0.2094	0.2071	0.167	0.2004	0.1938	0.2183	0.2272	0.2383	0.1849	0.2383	0.2249	0.2494	0.2272	0.2316	0.1938	0.2361	0.1871	0.1336	0.0913	0.0713	0.098	0.078	0.1047	0.0824
Fungi_Release38	aspergillus_flavus	G	0.2673	0.2272	0.1849	0.1982	0.2205	0.2205	0.1849	0.1715	0.1871	0.1938	0.1893	0.2071	0.2428	0.2227	0.2717	0.2383	0.2183	0.2294	0.2472	0.2249	0.2227	0.2873	0.2695	0.2472	0.2428	0.2294	0.2539	0.2316	0.2517	0.2383	0.2027	0.2316	0.2472	0.1915	0.1938	0.2205	0.216	0.1915	0.2428	0.3252	0.4633	0.5924	0.6169	0.5323	0.5167	0.3808	0.343
Fungi_Release38	aspergillus_flavus	T	0.3252	0.3653	0.3385	0.3118	0.3608	0.3118	0.3252	0.3118	0.3653	0.3252	0.3363	0.3185	0.2918	0.2851	0.2829	0.3007	0.2739	0.2873	0.3073	0.294	0.2984	0.2851	0.2517	0.245	0.3073	0.2806	0.2717	0.2561	0.2717	0.2895	0.2806	0.3207	0.2517	0.2762	0.2918	0.3163	0.2829	0.2739	0.265	0.2584	0.1737	0.1425	0.118	0.1537	0.1247	0.2294	0.1069
Fungi_Release38	coccidioides_posadasii_str_silveira	A	0.2405	0.2116	0.2561	0.2494	0.2717	0.2383	0.2606	0.2539	0.2405	0.2405	0.2116	0.2717	0.2249	0.2739	0.2628	0.2183	0.2339	0.2249	0.2494	0.2561	0.2784	0.3029	0.2628	0.2784	0.2272	0.2606	0.265	0.2539	0.2561	0.2717	0.2673	0.2383	0.294	0.2806	0.2494	0.2517	0.2517	0.2806	0.2784	0.2004	0.2361	0.2094	0.1826	0.2316	0.2383	0.3096	0.4588
Fungi_Release38	coccidioides_posadasii_str_silveira	C	0.245	0.2249	0.2584	0.2294	0.2383	0.2205	0.245	0.2272	0.2339	0.2272	0.2561	0.2361	0.2472	0.2561	0.2606	0.2494	0.2183	0.216	0.2227	0.2294	0.196	0.2183	0.2316	0.1915	0.196	0.2428	0.2405	0.2294	0.2116	0.2272	0.1982	0.2205	0.1871	0.2049	0.2361	0.2539	0.196	0.2183	0.1938	0.196	0.1136	0.0757	0.0846	0.098	0.1247	0.118	0.0935
Fungi_Release38	coccidioides_posadasii_str_silveira	G	0.2205	0.2584	0.1915	0.216	0.2094	0.2517	0.1982	0.2027	0.2094	0.2071	0.2405	0.2227	0.2138	0.2116	0.216	0.2116	0.2494	0.2227	0.1982	0.2428	0.2405	0.2138	0.2339	0.2494	0.2339	0.196	0.2249	0.1715	0.2116	0.1915	0.2116	0.2027	0.2316	0.2004	0.2027	0.1826	0.2494	0.2316	0.2628	0.3073	0.4833	0.6102	0.6102	0.5256	0.5145	0.3653	0.3363
Fungi_Release38	coccidioides_posadasii_str_silveira	T	0.294	0.3051	0.294	0.3051	0.2806	0.2895	0.2962	0.3163	0.3163	0.3252	0.2918	0.2695	0.314	0.2584	0.2606	0.3207	0.2984	0.3363	0.3296	0.2717	0.2851	0.265	0.2717	0.2806	0.343	0.3007	0.2695	0.3452	0.3207	0.3096	0.3229	0.3385	0.2873	0.314	0.3118	0.3118	0.3029	0.2695	0.265	0.2962	0.167	0.1047	0.1225	0.1448	0.1225	0.2071	0.1114
Fungi_Release38	colletotrichum_simmondsii	A	0.2299	0.2143	0.2254	0.2455	0.25	0.221	0.2522	0.2455	0.2589	0.2277	0.2321	0.2299	0.2902	0.2634	0.2366	0.2634	0.2701	0.2455	0.2946	0.2612	0.2344	0.2679	0.2679	0.2857	0.2455	0.2656	0.2455	0.3147	0.2768	0.2835	0.2188	0.2946	0.279	0.279	0.279	0.3013	0.2768	0.3036	0.3214	0.2121	0.2522	0.1853	0.183	0.2009	0.2344	0.2991	0.5179
Fungi_Release38	colletotrichum_simmondsii	C	0.2522	0.2411	0.2835	0.2321	0.25	0.2522	0.2879	0.2612	0.2344	0.2902	0.2522	0.2522	0.2411	0.2366	0.2388	0.2299	0.2076	0.2545	0.2366	0.2121	0.2344	0.2031	0.2031	0.2232	0.2232	0.1942	0.2165	0.1585	0.2254	0.2478	0.2031	0.2076	0.2299	0.2545	0.2232	0.2746	0.2054	0.2321	0.1853	0.2455	0.1138	0.1049	0.0737	0.096	0.1094	0.1362	0.0915
Fungi_Release38	colletotrichum_simmondsii	G	0.2768	0.2768	0.2388	0.2232	0.2121	0.2433	0.1987	0.25	0.2121	0.1987	0.2522	0.2411	0.2366	0.2143	0.2567	0.2455	0.2701	0.2545	0.2478	0.2344	0.25	0.2656	0.2522	0.2076	0.2545	0.2768	0.2946	0.2701	0.2679	0.2299	0.2746	0.2277	0.2455	0.1853	0.2031	0.1808	0.2031	0.2076	0.25	0.308	0.4754	0.5647	0.6339	0.558	0.5603	0.3973	0.3371
Fungi_Release38	colletotrichum_simmondsii	T	0.2411	0.2679	0.2522	0.2991	0.2879	0.2835	0.2612	0.2433	0.2946	0.2835	0.2634	0.2768	0.2321	0.2857	0.2679	0.2612	0.2522	0.2455	0.221	0.2924	0.2812	0.2634	0.2768	0.2835	0.2768	0.2634	0.2433	0.2567	0.2299	0.2388	0.3036	0.2701	0.2455	0.2812	0.2946	0.2433	0.3147	0.2567	0.2433	0.2344	0.1585	0.1451	0.1094	0.1451	0.096	0.1674	0.0536
Fungi_Release38	colletotrichum_nymphaeae_sa_01	A	0.2371	0.2371	0.2438	0.2461	0.2438	0.2215	0.2237	0.2528	0.2483	0.2349	0.2237	0.2125	0.2438	0.2394	0.2528	0.2438	0.2729	0.2304	0.3043	0.2617	0.2595	0.2617	0.2662	0.2752	0.2595	0.3132	0.2707	0.311	0.2953	0.2617	0.2438	0.2953	0.2998	0.2506	0.2752	0.2886	0.311	0.2975	0.3311	0.2394	0.2371	0.1812	0.1834	0.2081	0.2707	0.311	0.5078
Fungi_Release38	colletotrichum_nymphaeae_sa_01	C	0.2304	0.2215	0.2438	0.2573	0.2349	0.2685	0.2573	0.2662	0.2617	0.2662	0.2573	0.2461	0.2237	0.2438	0.255	0.2327	0.1902	0.226	0.2058	0.2282	0.2327	0.1991	0.2058	0.2416	0.2081	0.179	0.2103	0.179	0.2058	0.2237	0.1924	0.217	0.2215	0.2438	0.2438	0.2506	0.1946	0.2416	0.2013	0.2304	0.1342	0.1141	0.0537	0.0984	0.0962	0.1387	0.1141
Fungi_Release38	colletotrichum_nymphaeae_sa_01	G	0.2595	0.255	0.226	0.2081	0.2081	0.1969	0.2282	0.2416	0.2103	0.2013	0.2215	0.2506	0.264	0.2327	0.2349	0.2416	0.264	0.2729	0.255	0.2573	0.2394	0.2998	0.264	0.2103	0.2774	0.2595	0.2752	0.264	0.255	0.2483	0.264	0.2483	0.2394	0.2215	0.2036	0.2036	0.1924	0.2103	0.2416	0.2774	0.472	0.5884	0.6532	0.5459	0.5347	0.3781	0.311
Fungi_Release38	colletotrichum_nymphaeae_sa_01	T	0.2729	0.2864	0.2864	0.2886	0.3132	0.3132	0.2908	0.2394	0.2796	0.2975	0.2975	0.2908	0.2685	0.2841	0.2573	0.2819	0.2729	0.2707	0.2349	0.2528	0.2685	0.2394	0.264	0.2729	0.255	0.2483	0.2438	0.2461	0.2438	0.2662	0.2998	0.2394	0.2394	0.2841	0.2774	0.2573	0.302	0.2506	0.226	0.2528	0.1566	0.1163	0.1096	0.1477	0.0984	0.1723	0.0671
Fungi_Release38	acidomyces_richmondensis_bfw	A	0.2623	0.2309	0.2332	0.2422	0.2242	0.1883	0.2265	0.2332	0.2511	0.2197	0.2242	0.2466	0.2309	0.2556	0.2803	0.2534	0.2309	0.2422	0.2668	0.2399	0.2758	0.2556	0.287	0.3117	0.2556	0.2646	0.2735	0.2646	0.2668	0.2623	0.2601	0.2466	0.2287	0.2668	0.2534	0.2063	0.2691	0.287	0.2758	0.1749	0.2265	0.2085	0.222	0.2578	0.2197	0.2265	0.37
Fungi_Release38	acidomyces_richmondensis_bfw	C	0.2601	0.2242	0.2578	0.2511	0.2601	0.2534	0.2399	0.2623	0.2377	0.2691	0.2578	0.2646	0.2691	0.2578	0.2175	0.2601	0.2399	0.2152	0.2399	0.2265	0.2399	0.2466	0.2466	0.1816	0.1861	0.2175	0.213	0.2601	0.2466	0.2197	0.2354	0.2265	0.1951	0.2377	0.2601	0.2422	0.1592	0.1951	0.2242	0.2197	0.1256	0.0919	0.1009	0.1233	0.1143	0.1345	0.1031
Fungi_Release38	acidomyces_richmondensis_bfw	G	0.2354	0.2556	0.2578	0.2354	0.2309	0.2825	0.2511	0.2803	0.2489	0.213	0.2601	0.2556	0.2735	0.2646	0.2063	0.2354	0.2668	0.2803	0.2242	0.2825	0.2646	0.2691	0.2511	0.2758	0.2803	0.2848	0.3049	0.2534	0.2601	0.2735	0.2623	0.2601	0.2892	0.2623	0.278	0.2646	0.2892	0.3184	0.3094	0.3924	0.5404	0.5673	0.5426	0.4731	0.5583	0.4619	0.4529
Fungi_Release38	acidomyces_richmondensis_bfw	T	0.2422	0.2892	0.2511	0.2713	0.2848	0.2758	0.2825	0.2242	0.2623	0.2982	0.2578	0.2332	0.2265	0.222	0.296	0.2511	0.2623	0.2623	0.2691	0.2511	0.2197	0.2287	0.2152	0.2309	0.278	0.2332	0.2085	0.222	0.2265	0.2444	0.2422	0.2668	0.287	0.2332	0.2085	0.287	0.2825	0.1996	0.1906	0.213	0.1076	0.1323	0.1345	0.1457	0.1076	0.1771	0.074
Fungi_Release38	pseudogymnoascus_sp_vkm_f_3808	A	0.2556	0.2466	0.2309	0.2534	0.2265	0.2444	0.2668	0.2623	0.2063	0.2713	0.2758	0.2489	0.213	0.2399	0.2063	0.2309	0.2197	0.2265	0.2691	0.2623	0.2309	0.2399	0.278	0.2534	0.2825	0.2377	0.3117	0.296	0.2892	0.2691	0.2691	0.2556	0.2982	0.2758	0.2422	0.287	0.3206	0.3229	0.3184	0.222	0.2623	0.1906	0.1547	0.1726	0.2668	0.3117	0.4798
Fungi_Release38	pseudogymnoascus_sp_vkm_f_3808	C	0.1951	0.222	0.2242	0.1839	0.2399	0.213	0.2489	0.2287	0.2354	0.2287	0.2309	0.2309	0.2287	0.213	0.2332	0.2422	0.222	0.1996	0.1951	0.2108	0.1794	0.1794	0.2085	0.1726	0.1928	0.1659	0.1502	0.1614	0.1682	0.2018	0.2265	0.1928	0.1973	0.222	0.2085	0.2556	0.1928	0.1973	0.1973	0.1861	0.1099	0.1188	0.083	0.0605	0.0605	0.1076	0.0897
Fungi_Release38	pseudogymnoascus_sp_vkm_f_3808	G	0.2982	0.2646	0.2646	0.2982	0.2489	0.2354	0.1861	0.2332	0.2646	0.2377	0.2265	0.2175	0.2623	0.2511	0.2691	0.2713	0.2556	0.2377	0.2578	0.2646	0.2713	0.3072	0.2578	0.287	0.2623	0.2892	0.2713	0.278	0.278	0.2466	0.2422	0.2848	0.2489	0.2354	0.2466	0.1839	0.1951	0.2422	0.2332	0.3251	0.4596	0.5673	0.6345	0.6054	0.5717	0.4013	0.3318
Fungi_Release38	pseudogymnoascus_sp_vkm_f_3808	T	0.2511	0.2668	0.2803	0.2646	0.2848	0.3072	0.2982	0.2758	0.2937	0.2623	0.2668	0.3027	0.296	0.296	0.2915	0.2556	0.3027	0.3363	0.278	0.2623	0.3184	0.2735	0.2556	0.287	0.2623	0.3072	0.2668	0.2646	0.2646	0.2825	0.2623	0.2668	0.2556	0.2668	0.3027	0.2735	0.2915	0.2377	0.2511	0.2668	0.1682	0.1233	0.1278	0.1614	0.1009	0.1794	0.0987
Fungi_Release38	neurospora_tetrasperma_fgsc_2508	A	0.2302	0.2822	0.2528	0.2573	0.2686	0.2393	0.219	0.2641	0.2077	0.2596	0.2506	0.2257	0.2641	0.2302	0.2528	0.2754	0.2844	0.2619	0.2641	0.2686	0.2664	0.2664	0.2551	0.2709	0.298	0.2867	0.3025	0.2799	0.2686	0.2438	0.3093	0.2844	0.2686	0.2844	0.2777	0.2438	0.2573	0.3251	0.2822	0.2077	0.237	0.246	0.2438	0.2325	0.2664	0.3386	0.5056
Fungi_Release38	neurospora_tetrasperma_fgsc_2508	C	0.246	0.2393	0.2257	0.2167	0.2551	0.2257	0.219	0.237	0.2551	0.2551	0.2009	0.2325	0.2302	0.1896	0.2302	0.2235	0.219	0.2167	0.1806	0.1964	0.1874	0.219	0.2099	0.2212	0.2302	0.2438	0.1806	0.2167	0.2596	0.2009	0.2009	0.219	0.2122	0.219	0.2077	0.2054	0.2235	0.1716	0.1603	0.2122	0.1242	0.0745	0.0835	0.1016	0.1084	0.1106	0.0971
Fungi_Release38	neurospora_tetrasperma_fgsc_2508	G	0.2619	0.2641	0.2731	0.2709	0.228	0.2686	0.2641	0.2822	0.2709	0.2641	0.2731	0.2822	0.2325	0.2935	0.246	0.2551	0.2754	0.2844	0.3002	0.2889	0.2709	0.2619	0.2889	0.2889	0.2257	0.2077	0.2777	0.2551	0.2573	0.2641	0.246	0.2551	0.2483	0.2167	0.2596	0.2822	0.2754	0.2935	0.3454	0.4041	0.4989	0.535	0.5801	0.544	0.5079	0.3544	0.3251
Fungi_Release38	neurospora_tetrasperma_fgsc_2508	T	0.2619	0.2144	0.2483	0.2551	0.2483	0.2664	0.298	0.2167	0.2664	0.2212	0.2754	0.2596	0.2731	0.2867	0.2709	0.246	0.2212	0.237	0.2551	0.246	0.2754	0.2528	0.246	0.219	0.246	0.2619	0.2393	0.2483	0.2144	0.2912	0.2438	0.2415	0.2709	0.2799	0.2551	0.2686	0.2438	0.2099	0.2122	0.1761	0.14	0.1445	0.0926	0.1219	0.1174	0.1964	0.0722
Fungi_Release38	colletotrichum_tofieldiae	A	0.2376	0.1833	0.233	0.1991	0.181	0.2398	0.2579	0.267	0.2172	0.2602	0.1855	0.2262	0.2036	0.2127	0.2262	0.2262	0.2602	0.2534	0.2443	0.224	0.2602	0.2489	0.276	0.2624	0.2557	0.2602	0.2896	0.2489	0.2873	0.2149	0.2511	0.2353	0.2624	0.2873	0.2534	0.2602	0.3235	0.3258	0.3258	0.2285	0.2195	0.181	0.1697	0.1923	0.2172	0.3281	0.4751
Fungi_Release38	colletotrichum_tofieldiae	C	0.2421	0.2511	0.2692	0.2692	0.3009	0.2579	0.2376	0.267	0.2919	0.2443	0.2692	0.2919	0.3167	0.2602	0.2489	0.267	0.2376	0.2104	0.2624	0.2715	0.1968	0.2602	0.2217	0.2285	0.2217	0.2285	0.233	0.2443	0.2353	0.2873	0.2398	0.2624	0.2195	0.2421	0.2851	0.2783	0.1923	0.2421	0.233	0.2557	0.1674	0.1131	0.086	0.0973	0.1109	0.1448	0.1131
Fungi_Release38	colletotrichum_tofieldiae	G	0.2534	0.3054	0.2715	0.2285	0.2443	0.2421	0.2398	0.2376	0.2579	0.2466	0.2466	0.2647	0.2443	0.2602	0.3032	0.2421	0.276	0.2511	0.2421	0.2692	0.276	0.2692	0.2851	0.31	0.2896	0.3145	0.2896	0.2466	0.2489	0.2602	0.2579	0.2443	0.2262	0.224	0.2104	0.1855	0.2149	0.2466	0.2262	0.3371	0.4638	0.5747	0.638	0.5973	0.552	0.3552	0.3665
Fungi_Release38	colletotrichum_tofieldiae	T	0.267	0.2602	0.2262	0.3032	0.2738	0.2602	0.2647	0.2285	0.233	0.2489	0.2986	0.2172	0.2353	0.267	0.2217	0.2647	0.2262	0.2851	0.2511	0.2353	0.267	0.2217	0.2172	0.1991	0.233	0.1968	0.1878	0.2602	0.2285	0.2376	0.2511	0.2579	0.2919	0.2466	0.2511	0.276	0.2692	0.1855	0.2149	0.1787	0.1493	0.1312	0.1063	0.1131	0.1199	0.1719	0.0452
Fungi_Release38	bipolaris_maydis_c5	A	0.2789	0.2494	0.229	0.2268	0.2381	0.229	0.2336	0.2608	0.2925	0.2585	0.2608	0.2676	0.2585	0.2562	0.2925	0.263	0.263	0.2404	0.2449	0.2517	0.2585	0.2585	0.2948	0.2698	0.3243	0.2857	0.2676	0.2993	0.2676	0.3152	0.2472	0.2562	0.2993	0.2653	0.2698	0.254	0.2834	0.3243	0.3107	0.2358	0.263	0.2109	0.1837	0.1655	0.2721	0.2857	0.4376
Fungi_Release38	bipolaris_maydis_c5	C	0.1769	0.1973	0.22	0.2404	0.2472	0.2698	0.22	0.2336	0.2018	0.2154	0.2426	0.2109	0.1995	0.2177	0.2517	0.2426	0.1859	0.1927	0.1859	0.1814	0.1701	0.1927	0.1791	0.2154	0.1973	0.1791	0.2041	0.2154	0.2132	0.1791	0.2268	0.1905	0.1927	0.2517	0.2336	0.2472	0.2063	0.1927	0.1995	0.2268	0.1315	0.1156	0.0703	0.0952	0.0907	0.1224	0.1043
Fungi_Release38	bipolaris_maydis_c5	G	0.2608	0.2721	0.2812	0.2336	0.2698	0.2426	0.2517	0.2449	0.2381	0.2472	0.2222	0.2381	0.2902	0.2562	0.1995	0.2494	0.2834	0.2789	0.2676	0.254	0.2857	0.263	0.2971	0.2902	0.2449	0.2698	0.2744	0.2653	0.2426	0.2653	0.263	0.2653	0.2381	0.2585	0.229	0.2222	0.22	0.2449	0.2676	0.3197	0.4535	0.5669	0.6054	0.6009	0.5465	0.4014	0.3878
Fungi_Release38	bipolaris_maydis_c5	T	0.2834	0.2812	0.2698	0.2993	0.2449	0.2585	0.2948	0.2608	0.2676	0.2789	0.2744	0.2834	0.2517	0.2698	0.2562	0.2449	0.2676	0.288	0.3016	0.3129	0.2857	0.2857	0.229	0.2245	0.2336	0.2653	0.254	0.22	0.2766	0.2404	0.263	0.288	0.2698	0.2245	0.2676	0.2766	0.2902	0.2381	0.2222	0.2177	0.1519	0.1066	0.1406	0.1383	0.0907	0.1905	0.0703
Fungi_Release38	trichoderma_reesei	A	0.2177	0.2426	0.2132	0.2358	0.2404	0.2313	0.2358	0.2245	0.2358	0.2472	0.2494	0.2789	0.2154	0.2426	0.2608	0.2585	0.2109	0.2268	0.3016	0.254	0.2676	0.2721	0.2857	0.2812	0.2585	0.22	0.2585	0.2404	0.2381	0.254	0.2789	0.2336	0.2744	0.2404	0.288	0.2676	0.3039	0.2857	0.263	0.1927	0.2154	0.1723	0.2268	0.2336	0.3084	0.3107	0.4263
Fungi_Release38	trichoderma_reesei	C	0.2585	0.2744	0.254	0.2426	0.2948	0.2404	0.2653	0.2789	0.2404	0.2517	0.2404	0.2268	0.2653	0.2132	0.2222	0.2132	0.2268	0.2449	0.2063	0.2154	0.1791	0.2245	0.2018	0.2086	0.2041	0.2109	0.2336	0.2494	0.2472	0.2086	0.2222	0.2177	0.2381	0.2426	0.2313	0.2358	0.1905	0.2177	0.229	0.2268	0.1043	0.0952	0.0816	0.1111	0.127	0.1111	0.1293
Fungi_Release38	trichoderma_reesei	G	0.2698	0.2721	0.2744	0.2404	0.263	0.2902	0.2132	0.2789	0.263	0.229	0.2608	0.2585	0.2404	0.2766	0.2812	0.2109	0.322	0.3311	0.2608	0.2721	0.3016	0.2834	0.2744	0.288	0.2925	0.3333	0.3152	0.2744	0.254	0.3016	0.263	0.2585	0.2698	0.2698	0.2132	0.263	0.2676	0.3016	0.3175	0.3719	0.5125	0.5941	0.6054	0.5306	0.4626	0.4104	0.381
Fungi_Release38	trichoderma_reesei	T	0.254	0.2109	0.2585	0.2812	0.2018	0.2381	0.2857	0.2177	0.2608	0.2721	0.2494	0.2358	0.2789	0.2676	0.2358	0.3175	0.2404	0.1973	0.2313	0.2585	0.2517	0.22	0.2381	0.2222	0.2449	0.2358	0.1927	0.2358	0.2608	0.2358	0.2358	0.2902	0.2177	0.2472	0.2676	0.2336	0.2381	0.195	0.1905	0.2086	0.1678	0.1383	0.0862	0.1247	0.102	0.1678	0.0635
Fungi_Release38	saitoella_complicata_nrrl_y_17804_gca_001661265	A	0.1841	0.1545	0.2205	0.2136	0.2045	0.1977	0.2045	0.2364	0.1864	0.2	0.1682	0.2318	0.2023	0.2068	0.1841	0.1568	0.2091	0.2045	0.1909	0.2068	0.2023	0.2295	0.2386	0.2091	0.2591	0.2568	0.2386	0.2545	0.2318	0.225	0.2523	0.2114	0.2091	0.2932	0.2886	0.2909	0.3205	0.3341	0.2068	0.1705	0.1705	0.1409	0.1773	0.1841	0.2477	0.2114	0.5773
Fungi_Release38	saitoella_complicata_nrrl_y_17804_gca_001661265	C	0.2045	0.25	0.2477	0.3045	0.2523	0.2409	0.2795	0.2591	0.3045	0.2886	0.2773	0.2523	0.2818	0.2523	0.2477	0.2386	0.2068	0.2045	0.2318	0.1636	0.1841	0.1818	0.175	0.1455	0.1955	0.1591	0.1659	0.1818	0.1659	0.1614	0.1886	0.2159	0.1932	0.1818	0.2386	0.1773	0.1295	0.15	0.1977	0.1386	0.0614	0.0591	0.0705	0.1068	0.0727	0.1205	0.0386
Fungi_Release38	saitoella_complicata_nrrl_y_17804_gca_001661265	G	0.3068	0.2591	0.2386	0.1977	0.2636	0.2568	0.2114	0.2455	0.2341	0.2432	0.275	0.2659	0.2364	0.2545	0.2773	0.3159	0.2818	0.2682	0.2932	0.2932	0.3159	0.3273	0.3341	0.3955	0.325	0.3591	0.3682	0.3227	0.3386	0.3136	0.3023	0.2955	0.3023	0.2545	0.2091	0.2409	0.3205	0.2818	0.3545	0.4273	0.6364	0.6432	0.6295	0.5318	0.575	0.3659	0.3341
Fungi_Release38	saitoella_complicata_nrrl_y_17804_gca_001661265	T	0.3045	0.3364	0.2932	0.2841	0.2795	0.3045	0.3045	0.2591	0.275	0.2682	0.2795	0.25	0.2795	0.2864	0.2909	0.2886	0.3023	0.3227	0.2841	0.3364	0.2977	0.2614	0.2523	0.25	0.2205	0.225	0.2273	0.2409	0.2636	0.3	0.2568	0.2773	0.2955	0.2705	0.2636	0.2909	0.2295	0.2341	0.2409	0.2636	0.1318	0.1568	0.1227	0.1773	0.1045	0.3023	0.05
Fungi_Release38	nannizzia_gypsea_cbs_118893	A	0.2123	0.2306	0.2397	0.2717	0.2123	0.2306	0.2397	0.2557	0.2329	0.2237	0.2991	0.258	0.274	0.2329	0.2397	0.2466	0.2397	0.2374	0.2489	0.2854	0.3014	0.3014	0.2511	0.3288	0.3151	0.2763	0.2352	0.2991	0.3105	0.3265	0.2945	0.2922	0.2922	0.2808	0.2717	0.2991	0.363	0.3082	0.258	0.1895	0.2055	0.2169	0.1735	0.2215	0.2717	0.2991	0.5388
Fungi_Release38	nannizzia_gypsea_cbs_118893	C	0.2397	0.2489	0.2717	0.2306	0.2443	0.2329	0.2443	0.2397	0.2397	0.2215	0.1986	0.2329	0.1895	0.2306	0.2032	0.2055	0.1918	0.1804	0.1872	0.2237	0.21	0.1872	0.1986	0.1621	0.1689	0.2009	0.1986	0.2123	0.1918	0.1986	0.1986	0.1963	0.1644	0.2329	0.2123	0.2215	0.1918	0.1963	0.1986	0.1941	0.1256	0.0959	0.0753	0.0845	0.0708	0.0639	0.0799
Fungi_Release38	nannizzia_gypsea_cbs_118893	G	0.2169	0.1872	0.1941	0.2009	0.1735	0.2032	0.1735	0.1826	0.2237	0.2078	0.2078	0.2123	0.21	0.1849	0.2603	0.2306	0.2123	0.2671	0.274	0.2374	0.2329	0.2352	0.2603	0.2237	0.2443	0.2466	0.258	0.2169	0.2169	0.1986	0.21	0.2146	0.2534	0.1758	0.1918	0.1849	0.2078	0.2192	0.2945	0.379	0.5251	0.5502	0.621	0.5297	0.4977	0.3653	0.3059
Fungi_Release38	nannizzia_gypsea_cbs_118893	T	0.3311	0.3333	0.2945	0.2968	0.3699	0.3333	0.3425	0.3219	0.3037	0.347	0.2945	0.2968	0.3265	0.3516	0.2968	0.3174	0.3562	0.3151	0.29	0.2534	0.2557	0.2763	0.29	0.2854	0.2717	0.2763	0.3082	0.2717	0.2808	0.2763	0.2968	0.2968	0.29	0.3105	0.3242	0.2945	0.2374	0.2763	0.2489	0.2374	0.1438	0.137	0.1301	0.1644	0.1598	0.2717	0.0753
Fungi_Release38	diaporthe_helianthi	A	0.254	0.2059	0.27	0.2059	0.2586	0.2517	0.2677	0.2288	0.222	0.2563	0.2586	0.2357	0.2403	0.2609	0.2494	0.222	0.222	0.2586	0.2563	0.2517	0.2357	0.222	0.2769	0.3272	0.2677	0.2563	0.254	0.2632	0.2906	0.238	0.2449	0.286	0.2449	0.2586	0.27	0.2563	0.2609	0.2494	0.2609	0.1693	0.2197	0.1922	0.1945	0.1831	0.2746	0.3753	0.5103
Fungi_Release38	diaporthe_helianthi	C	0.2563	0.2609	0.2792	0.2998	0.2975	0.2586	0.3066	0.3043	0.3089	0.2952	0.2838	0.2723	0.27	0.2654	0.238	0.2563	0.2288	0.2334	0.2677	0.2609	0.2677	0.2403	0.2334	0.222	0.2471	0.2746	0.2449	0.2128	0.2471	0.286	0.2517	0.2403	0.2654	0.2311	0.2403	0.2357	0.2243	0.2426	0.2677	0.3021	0.119	0.1007	0.0801	0.151	0.1442	0.1556	0.0984
Fungi_Release38	diaporthe_helianthi	G	0.2243	0.2357	0.2105	0.2357	0.1968	0.2357	0.1945	0.2265	0.2288	0.1808	0.2311	0.2746	0.2586	0.2311	0.2128	0.2494	0.286	0.2769	0.2517	0.2105	0.2586	0.2815	0.2632	0.2517	0.2426	0.2128	0.2586	0.2563	0.2059	0.2151	0.2426	0.2563	0.2357	0.2151	0.2357	0.2563	0.2654	0.2883	0.2838	0.3364	0.5011	0.5721	0.6247	0.54	0.4645	0.3249	0.3066
Fungi_Release38	diaporthe_helianthi	T	0.2654	0.2975	0.2403	0.2586	0.2471	0.254	0.2311	0.2403	0.2403	0.2677	0.2265	0.2174	0.2311	0.2426	0.2998	0.2723	0.2632	0.2311	0.2243	0.2769	0.238	0.2563	0.2265	0.1991	0.2426	0.2563	0.2426	0.2677	0.2563	0.2609	0.2609	0.2174	0.254	0.2952	0.254	0.2517	0.2494	0.2197	0.1876	0.1922	0.1602	0.135	0.1007	0.1259	0.1167	0.1442	0.0847
Fungi_Release38	colletotrichum_salicis	A	0.2867	0.2317	0.2523	0.2385	0.2454	0.2913	0.2362	0.2271	0.2225	0.2362	0.2546	0.2729	0.2339	0.2431	0.2615	0.2798	0.2638	0.2683	0.2821	0.2569	0.2729	0.2683	0.2798	0.2913	0.2706	0.3119	0.2546	0.2867	0.2683	0.2706	0.2706	0.2523	0.2775	0.2431	0.2867	0.2661	0.3303	0.2959	0.3188	0.2225	0.2546	0.172	0.1904	0.1766	0.2408	0.3119	0.5
Fungi_Release38	colletotrichum_salicis	C	0.1927	0.2179	0.2064	0.2638	0.2569	0.25	0.2477	0.2477	0.2523	0.2683	0.2294	0.2546	0.2913	0.2798	0.2752	0.2362	0.2087	0.2638	0.2133	0.2041	0.211	0.211	0.2087	0.2018	0.2179	0.2179	0.2018	0.1858	0.2087	0.25	0.211	0.2202	0.2179	0.2752	0.2064	0.2546	0.2064	0.2179	0.2225	0.2385	0.1307	0.1055	0.0734	0.0894	0.1032	0.1216	0.0986
Fungi_Release38	colletotrichum_salicis	G	0.2523	0.2706	0.2821	0.2179	0.2454	0.2018	0.2294	0.2431	0.2661	0.211	0.2408	0.2133	0.2248	0.2408	0.2294	0.2362	0.289	0.2294	0.2752	0.2775	0.2385	0.2683	0.2592	0.2454	0.2477	0.2385	0.2569	0.2615	0.2844	0.2064	0.2317	0.2477	0.2317	0.2087	0.2133	0.2018	0.1537	0.2248	0.2339	0.2982	0.461	0.5917	0.6491	0.5849	0.5	0.383	0.3372
Fungi_Release38	colletotrichum_salicis	T	0.2683	0.2798	0.2592	0.2798	0.2523	0.2569	0.2867	0.2821	0.2592	0.2844	0.2752	0.2592	0.25	0.2362	0.2339	0.2477	0.2385	0.2385	0.2294	0.2615	0.2775	0.2523	0.2523	0.2615	0.2638	0.2317	0.2867	0.2661	0.2385	0.2729	0.2867	0.2798	0.2729	0.2729	0.2936	0.2775	0.3096	0.2615	0.2248	0.2408	0.1537	0.1307	0.0872	0.1491	0.156	0.1835	0.0642
Fungi_Release38	aspergillus_wentii_dto_134e9	A	0.2135	0.2227	0.2645	0.2135	0.2622	0.2459	0.2599	0.2251	0.2158	0.2599	0.2297	0.2413	0.2181	0.2552	0.239	0.2599	0.2575	0.2204	0.2668	0.2575	0.2622	0.2459	0.2854	0.2483	0.3039	0.2668	0.2761	0.2877	0.2738	0.3016	0.297	0.2761	0.2854	0.2831	0.2854	0.2738	0.2761	0.29	0.2715	0.2622	0.2668	0.2251	0.1856	0.1763	0.2367	0.2575	0.478
Fungi_Release38	aspergillus_wentii_dto_134e9	C	0.2111	0.2042	0.1926	0.2297	0.2019	0.2436	0.2436	0.2274	0.2436	0.2111	0.2459	0.2065	0.2413	0.2181	0.2552	0.239	0.2204	0.1995	0.2065	0.2065	0.2042	0.1995	0.1995	0.1926	0.1694	0.1949	0.1879	0.2158	0.1624	0.1949	0.1694	0.2111	0.1763	0.2297	0.1926	0.1833	0.2065	0.1949	0.2158	0.1578	0.0905	0.1044	0.0905	0.0603	0.0394	0.0626	0.0626
Fungi_Release38	aspergillus_wentii_dto_134e9	G	0.2459	0.2251	0.2227	0.2274	0.2413	0.2227	0.1694	0.1995	0.1995	0.1949	0.1903	0.2042	0.2042	0.1995	0.2042	0.2088	0.2111	0.2274	0.2065	0.232	0.2483	0.2413	0.2158	0.2575	0.2459	0.2413	0.2761	0.2413	0.2645	0.2506	0.239	0.2204	0.2204	0.2019	0.2181	0.2343	0.2529	0.232	0.2367	0.3063	0.4617	0.4826	0.536	0.5708	0.6218	0.4269	0.3689
Fungi_Release38	aspergillus_wentii_dto_134e9	T	0.3295	0.348	0.3202	0.3295	0.2947	0.2877	0.3271	0.348	0.3411	0.3341	0.3341	0.348	0.3364	0.3271	0.3016	0.2923	0.3109	0.3527	0.3202	0.3039	0.2854	0.3132	0.2993	0.3016	0.2807	0.297	0.2599	0.2552	0.2993	0.2529	0.2947	0.2923	0.3179	0.2854	0.3039	0.3086	0.2645	0.2831	0.2761	0.2738	0.181	0.1879	0.1879	0.1926	0.1021	0.2529	0.0905
Fungi_Release38	tolypocladium_ophioglossoides_cbs_100239	A	0.2121	0.2075	0.2261	0.1795	0.1911	0.1818	0.1655	0.1562	0.1981	0.1422	0.1515	0.1888	0.1702	0.1655	0.2471	0.1818	0.1725	0.1935	0.2331	0.2238	0.2354	0.2471	0.2145	0.2448	0.2494	0.2564	0.2378	0.2494	0.2121	0.1981	0.2751	0.2051	0.2005	0.2051	0.2284	0.2378	0.2471	0.2844	0.2797	0.2284	0.2145	0.1678	0.1841	0.1538	0.1958	0.2214	0.4056
Fungi_Release38	tolypocladium_ophioglossoides_cbs_100239	C	0.2494	0.2797	0.2751	0.3007	0.331	0.324	0.3217	0.2937	0.338	0.3217	0.317	0.2937	0.3193	0.2657	0.2681	0.2751	0.289	0.289	0.2704	0.2867	0.2564	0.2494	0.2657	0.2517	0.2238	0.2541	0.2448	0.2121	0.2727	0.2821	0.1911	0.2401	0.2751	0.2751	0.2424	0.2914	0.2564	0.2308	0.2471	0.2751	0.1725	0.1166	0.1142	0.1772	0.1142	0.1469	0.1072
Fungi_Release38	tolypocladium_ophioglossoides_cbs_100239	G	0.3054	0.2867	0.2448	0.31	0.2587	0.2704	0.3077	0.2914	0.2657	0.2727	0.289	0.289	0.2611	0.303	0.2634	0.296	0.2704	0.3007	0.2634	0.331	0.324	0.2774	0.324	0.2844	0.3077	0.303	0.317	0.338	0.3077	0.2984	0.2611	0.3124	0.2797	0.2634	0.2611	0.2448	0.2564	0.2657	0.296	0.3054	0.4918	0.62	0.627	0.5315	0.5851	0.4685	0.4289
Fungi_Release38	tolypocladium_ophioglossoides_cbs_100239	T	0.2331	0.2261	0.2541	0.2098	0.2191	0.2238	0.2051	0.2587	0.1981	0.2634	0.2424	0.2284	0.2494	0.2657	0.2214	0.2471	0.2681	0.2168	0.2331	0.1585	0.1841	0.2261	0.1958	0.2191	0.2191	0.1865	0.2005	0.2005	0.2075	0.2214	0.2727	0.2424	0.2448	0.2564	0.2681	0.2261	0.2401	0.2191	0.1772	0.1911	0.1212	0.0956	0.0746	0.1375	0.1049	0.1632	0.0583
Fungi_Release38	macrophomina_phaseolina_ms6	A	0.2173	0.1822	0.2103	0.229	0.2266	0.222	0.2593	0.2056	0.2243	0.236	0.2243	0.2103	0.222	0.1893	0.2477	0.2313	0.222	0.2103	0.2243	0.257	0.2477	0.243	0.2266	0.2383	0.2617	0.222	0.2383	0.2407	0.2453	0.243	0.2453	0.2477	0.243	0.257	0.1893	0.2103	0.2617	0.3178	0.285	0.2079	0.1893	0.2103	0.1846	0.1565	0.2056	0.25	0.4019
Fungi_Release38	macrophomina_phaseolina_ms6	C	0.2407	0.2243	0.2617	0.236	0.2126	0.1963	0.2593	0.2827	0.257	0.2664	0.3014	0.2897	0.2547	0.2617	0.2407	0.257	0.236	0.2827	0.2523	0.2477	0.2687	0.2103	0.2103	0.1986	0.2523	0.1869	0.229	0.2523	0.2453	0.236	0.264	0.2126	0.2383	0.2126	0.2734	0.2734	0.2266	0.1682	0.2196	0.2173	0.1612	0.0935	0.1005	0.1285	0.1145	0.1379	0.1005
Fungi_Release38	macrophomina_phaseolina_ms6	G	0.257	0.3271	0.2804	0.2827	0.2804	0.2921	0.2243	0.257	0.2453	0.2453	0.2336	0.25	0.2593	0.271	0.2664	0.2664	0.2687	0.2664	0.2687	0.2804	0.2804	0.2921	0.3061	0.3318	0.3037	0.3388	0.3294	0.2593	0.257	0.3014	0.2407	0.25	0.2827	0.257	0.2617	0.236	0.2336	0.257	0.2664	0.3692	0.521	0.5654	0.5911	0.5864	0.6005	0.4276	0.4206
Fungi_Release38	macrophomina_phaseolina_ms6	T	0.285	0.2664	0.2477	0.2523	0.2804	0.2897	0.257	0.2547	0.2734	0.2523	0.2407	0.25	0.264	0.278	0.2453	0.2453	0.2734	0.2407	0.2547	0.215	0.2033	0.2547	0.257	0.2313	0.1822	0.2523	0.2033	0.2477	0.2523	0.2196	0.25	0.2897	0.236	0.2734	0.2757	0.2804	0.278	0.257	0.229	0.2056	0.1285	0.1308	0.1238	0.1285	0.0794	0.1846	0.0771
Fungi_Release38	coccidioides_immitis_rs	A	0.2084	0.2225	0.2389	0.2084	0.2881	0.2014	0.2436	0.2436	0.2037	0.2061	0.1967	0.2365	0.2412	0.2319	0.2436	0.2178	0.2131	0.2201	0.2482	0.2482	0.2693	0.2365	0.2436	0.2881	0.2529	0.2927	0.2951	0.2506	0.2623	0.2763	0.2529	0.26	0.2787	0.26	0.2225	0.2319	0.267	0.3068	0.2365	0.1991	0.2436	0.1967	0.1991	0.2319	0.2623	0.3021	0.4754
Fungi_Release38	coccidioides_immitis_rs	C	0.2342	0.2131	0.281	0.2553	0.2342	0.2389	0.2482	0.2693	0.2389	0.2084	0.274	0.2389	0.2412	0.2506	0.2576	0.2201	0.2178	0.2084	0.2084	0.2248	0.2248	0.2436	0.2225	0.1967	0.2131	0.2459	0.2014	0.2131	0.2131	0.2014	0.2037	0.1991	0.1967	0.2342	0.2436	0.2576	0.2037	0.2342	0.192	0.1944	0.103	0.089	0.0492	0.082	0.1124	0.1288	0.0796
Fungi_Release38	coccidioides_immitis_rs	G	0.2459	0.2717	0.2295	0.2553	0.1991	0.2482	0.2108	0.1897	0.2037	0.2108	0.2155	0.2272	0.2061	0.2155	0.2155	0.2319	0.2412	0.2319	0.2272	0.2553	0.2342	0.2272	0.2482	0.2482	0.2412	0.1639	0.2108	0.1897	0.2225	0.192	0.2014	0.2225	0.2131	0.2131	0.2389	0.2014	0.2272	0.2295	0.2951	0.3326	0.4871	0.6066	0.6487	0.5644	0.5152	0.3607	0.3255
Fungi_Release38	coccidioides_immitis_rs	T	0.3115	0.2927	0.2506	0.281	0.2787	0.3115	0.2974	0.2974	0.3536	0.3747	0.3138	0.2974	0.3115	0.3021	0.2834	0.3302	0.3279	0.3396	0.3162	0.2717	0.2717	0.2927	0.2857	0.267	0.2927	0.2974	0.2927	0.3466	0.3021	0.3302	0.3419	0.3185	0.3115	0.2927	0.2951	0.3091	0.3021	0.2295	0.2763	0.274	0.1663	0.1077	0.103	0.1218	0.1101	0.2084	0.1194
Fungi_Release38	fusarium_oxysporum	A	0.2277	0.2606	0.2535	0.2512	0.2512	0.2629	0.2207	0.2653	0.2441	0.223	0.2864	0.2723	0.23	0.2582	0.2676	0.2676	0.2629	0.2793	0.2653	0.2582	0.2934	0.3005	0.2559	0.2629	0.2887	0.3052	0.2723	0.2864	0.2817	0.3146	0.2864	0.3099	0.2347	0.2746	0.284	0.2629	0.2887	0.3052	0.284	0.2512	0.2817	0.1878	0.2277	0.1995	0.2207	0.3075	0.4789
Fungi_Release38	fusarium_oxysporum	C	0.2042	0.1995	0.1761	0.23	0.23	0.2019	0.2512	0.2254	0.284	0.2746	0.2441	0.1925	0.2535	0.2183	0.2582	0.2418	0.2441	0.2207	0.1901	0.2371	0.2394	0.2254	0.2089	0.2371	0.1948	0.223	0.1714	0.2042	0.2136	0.23	0.216	0.1761	0.1995	0.1925	0.2371	0.2207	0.2136	0.2136	0.1761	0.1784	0.1667	0.1432	0.0822	0.1009	0.108	0.0798	0.0751
Fungi_Release38	fusarium_oxysporum	G	0.277	0.2418	0.2676	0.2418	0.2113	0.216	0.216	0.2042	0.1901	0.2089	0.1854	0.2371	0.2113	0.2394	0.1808	0.223	0.1901	0.2207	0.2535	0.2207	0.2089	0.1808	0.2136	0.2136	0.2606	0.2324	0.27	0.2207	0.2183	0.2113	0.1925	0.2113	0.2324	0.2089	0.2207	0.1831	0.2066	0.2488	0.2653	0.3333	0.4108	0.5376	0.5728	0.5587	0.5446	0.3779	0.3685
Fungi_Release38	fusarium_oxysporum	T	0.2911	0.2981	0.3028	0.277	0.3075	0.3192	0.3122	0.3052	0.2817	0.2934	0.284	0.2981	0.3052	0.284	0.2934	0.2676	0.3028	0.2793	0.2911	0.284	0.2582	0.2934	0.3216	0.2864	0.2559	0.2394	0.2864	0.2887	0.2864	0.2441	0.3052	0.3028	0.3333	0.3239	0.2582	0.3333	0.2911	0.2324	0.2746	0.2371	0.1408	0.1315	0.1174	0.1408	0.1268	0.2347	0.0775
Fungi_Release38	talaromyces_islandicus	A	0.223	0.223	0.2582	0.2535	0.2606	0.2183	0.2371	0.2559	0.2394	0.2394	0.2606	0.2371	0.2488	0.3216	0.2066	0.2911	0.2746	0.2981	0.2653	0.27	0.2113	0.3028	0.2864	0.2793	0.3005	0.3427	0.2817	0.2793	0.2934	0.2887	0.3075	0.2981	0.3662	0.3028	0.2817	0.2864	0.3286	0.3099	0.2653	0.2465	0.2911	0.2324	0.2066	0.1972	0.2418	0.3169	0.5399
Fungi_Release38	talaromyces_islandicus	C	0.1972	0.2277	0.1995	0.2254	0.2582	0.2418	0.223	0.2465	0.2113	0.2512	0.23	0.2136	0.2254	0.1925	0.2347	0.1948	0.2042	0.162	0.2136	0.1784	0.2042	0.1479	0.1831	0.1948	0.1925	0.1549	0.1972	0.2019	0.1948	0.2512	0.1925	0.1854	0.1737	0.2347	0.2066	0.1972	0.1784	0.2113	0.1878	0.1408	0.108	0.1385	0.0681	0.0775	0.0728	0.108	0.0845
Fungi_Release38	talaromyces_islandicus	G	0.2277	0.2113	0.2019	0.169	0.1502	0.1761	0.1808	0.1573	0.1714	0.1714	0.1526	0.1714	0.1549	0.1573	0.1714	0.1761	0.216	0.2042	0.1948	0.23	0.2606	0.1995	0.2066	0.2418	0.2254	0.2207	0.2042	0.2371	0.2512	0.2042	0.1761	0.1878	0.1573	0.1596	0.1948	0.1667	0.2066	0.2347	0.2488	0.3568	0.4671	0.4977	0.5728	0.5798	0.5845	0.3944	0.2864
Fungi_Release38	talaromyces_islandicus	T	0.3521	0.338	0.3404	0.3521	0.331	0.3638	0.3592	0.3404	0.3779	0.338	0.3568	0.3779	0.3709	0.3286	0.3873	0.338	0.3052	0.3357	0.3263	0.3216	0.3239	0.3498	0.3239	0.284	0.2817	0.2817	0.3169	0.2817	0.2606	0.2559	0.3239	0.3286	0.3028	0.3028	0.3169	0.3498	0.2864	0.2441	0.2981	0.2559	0.1338	0.1315	0.1526	0.1455	0.1009	0.1808	0.0892
Fungi_Release38	aspergillus_fumigatus_z5	A	0.2311	0.2005	0.2146	0.2193	0.1651	0.2241	0.2099	0.2264	0.2052	0.25	0.2311	0.2099	0.1981	0.2123	0.2241	0.2217	0.2146	0.2288	0.2453	0.2524	0.2453	0.2712	0.2382	0.2453	0.2901	0.2547	0.316	0.2901	0.2594	0.2783	0.2311	0.2689	0.2854	0.2594	0.2524	0.2052	0.2618	0.2854	0.2476	0.2382	0.2948	0.2406	0.1533	0.1863	0.1981	0.2807	0.4835
Fungi_Release38	aspergillus_fumigatus_z5	C	0.2075	0.2406	0.2335	0.2288	0.2759	0.2524	0.2453	0.2807	0.2594	0.2547	0.2736	0.2571	0.2854	0.2406	0.2547	0.2241	0.2476	0.2335	0.2524	0.217	0.1934	0.2005	0.2099	0.2618	0.2382	0.2193	0.2028	0.2217	0.217	0.2288	0.1981	0.2241	0.2217	0.2288	0.2335	0.2453	0.2241	0.2335	0.2217	0.1769	0.1321	0.1297	0.1203	0.0896	0.0943	0.1014	0.0849
Fungi_Release38	aspergillus_fumigatus_z5	G	0.2476	0.2476	0.2594	0.2476	0.2689	0.2075	0.2335	0.217	0.2193	0.2217	0.1745	0.2264	0.2099	0.2288	0.2146	0.217	0.2689	0.2406	0.2335	0.2311	0.2382	0.2642	0.2618	0.2241	0.2288	0.2571	0.2358	0.2193	0.2665	0.2476	0.283	0.2594	0.2335	0.2099	0.2241	0.2335	0.2358	0.2311	0.2476	0.2877	0.4434	0.4976	0.5991	0.5896	0.5967	0.4458	0.3538
Fungi_Release38	aspergillus_fumigatus_z5	T	0.3137	0.3113	0.2925	0.3042	0.2901	0.316	0.3113	0.2759	0.316	0.2736	0.3208	0.3066	0.3066	0.3184	0.3066	0.3373	0.2689	0.2972	0.2689	0.2995	0.3231	0.2642	0.2901	0.2689	0.2429	0.2689	0.2453	0.2689	0.2571	0.2453	0.2877	0.2476	0.2594	0.3019	0.2901	0.316	0.2783	0.25	0.283	0.2972	0.1297	0.1321	0.1274	0.1344	0.1108	0.1722	0.0778
Fungi_Release38	colletotrichum_fioriniae_pj7	A	0.2246	0.2317	0.2222	0.2246	0.2057	0.2459	0.2719	0.2175	0.2199	0.2459	0.2364	0.2364	0.253	0.2411	0.2388	0.2364	0.3168	0.2742	0.26	0.2884	0.2506	0.3121	0.2624	0.2482	0.2837	0.2671	0.2671	0.279	0.2648	0.2766	0.253	0.2861	0.2766	0.2411	0.3121	0.3168	0.3452	0.3002	0.3239	0.2317	0.2671	0.2057	0.1962	0.2009	0.2813	0.3191	0.5012
Fungi_Release38	colletotrichum_fioriniae_pj7	C	0.2364	0.2671	0.2364	0.2459	0.2482	0.2388	0.2175	0.2861	0.2931	0.279	0.279	0.2435	0.2695	0.2506	0.2411	0.2246	0.2057	0.2506	0.2222	0.2057	0.1986	0.1726	0.2128	0.2506	0.2175	0.2199	0.227	0.1584	0.2411	0.2388	0.2293	0.2104	0.2104	0.2766	0.1986	0.234	0.2151	0.227	0.1962	0.2222	0.1206	0.0922	0.0898	0.0804	0.1182	0.1324	0.0969
Fungi_Release38	colletotrichum_fioriniae_pj7	G	0.2553	0.253	0.2506	0.26	0.253	0.2293	0.2104	0.2317	0.2222	0.253	0.2175	0.2246	0.1868	0.2175	0.1939	0.2388	0.2459	0.2293	0.2482	0.227	0.2955	0.2411	0.2364	0.2459	0.2648	0.2459	0.2624	0.2861	0.2388	0.2151	0.2482	0.2057	0.2246	0.227	0.1773	0.1939	0.1537	0.2104	0.2459	0.3381	0.4634	0.6052	0.591	0.5437	0.5248	0.3712	0.3239
Fungi_Release38	colletotrichum_fioriniae_pj7	T	0.2837	0.2482	0.2908	0.2695	0.2931	0.2861	0.3002	0.2648	0.2648	0.2222	0.2671	0.2955	0.2908	0.2908	0.3262	0.3002	0.2317	0.2459	0.2695	0.279	0.2553	0.2742	0.2884	0.2553	0.234	0.2671	0.2435	0.2766	0.2553	0.2695	0.2695	0.2979	0.2884	0.2553	0.3121	0.2553	0.2861	0.2624	0.234	0.208	0.1489	0.0969	0.1229	0.1749	0.0757	0.1773	0.078
Fungi_Release38	fusarium_oxysporum_f_sp_cubense_race_1	A	0.2577	0.2553	0.2506	0.2506	0.2317	0.2813	0.2553	0.2364	0.2222	0.2246	0.2766	0.2506	0.2364	0.2506	0.2908	0.2766	0.2506	0.2695	0.2719	0.26	0.2837	0.2742	0.2671	0.2931	0.2648	0.2861	0.2766	0.2861	0.2908	0.279	0.3002	0.2742	0.2388	0.2695	0.2482	0.2553	0.279	0.279	0.2813	0.2482	0.2884	0.2388	0.1939	0.1489	0.1939	0.2435	0.4421
Fungi_Release38	fusarium_oxysporum_f_sp_cubense_race_1	C	0.2151	0.2388	0.1915	0.2057	0.182	0.1986	0.2388	0.234	0.2648	0.2411	0.2553	0.2057	0.2506	0.2506	0.2577	0.2364	0.2553	0.2199	0.2151	0.2009	0.2411	0.2175	0.2246	0.208	0.2222	0.2033	0.1891	0.208	0.2175	0.2033	0.2411	0.2009	0.2128	0.2317	0.26	0.2293	0.2317	0.2293	0.2057	0.1915	0.1466	0.182	0.0946	0.1182	0.0851	0.0922	0.0993
Fungi_Release38	fusarium_oxysporum_f_sp_cubense_race_1	G	0.2435	0.2813	0.2364	0.2742	0.2364	0.2388	0.2128	0.2388	0.1915	0.2317	0.1773	0.2293	0.2175	0.2057	0.1702	0.2246	0.2222	0.2364	0.2222	0.2459	0.2128	0.2293	0.2459	0.2317	0.253	0.253	0.305	0.2435	0.2411	0.2577	0.2009	0.2388	0.2553	0.208	0.2222	0.1939	0.2033	0.2199	0.234	0.2908	0.4208	0.4728	0.5839	0.5934	0.5957	0.4634	0.3475
Fungi_Release38	fusarium_oxysporum_f_sp_cubense_race_1	T	0.2837	0.2246	0.3215	0.2695	0.3499	0.2813	0.2931	0.2908	0.3215	0.3026	0.2908	0.3144	0.2955	0.2931	0.2813	0.2624	0.2719	0.2742	0.2908	0.2931	0.2624	0.279	0.2624	0.2671	0.26	0.2577	0.2293	0.2624	0.2506	0.26	0.2577	0.2861	0.2931	0.2908	0.2695	0.3215	0.2861	0.2719	0.279	0.2695	0.1442	0.1064	0.1277	0.1395	0.1253	0.2009	0.1111
Fungi_Release38	fusarium_oxysporum_f_sp_melonis_26406	A	0.237	0.2583	0.2512	0.2322	0.2441	0.2796	0.2251	0.2512	0.2417	0.2085	0.2749	0.2512	0.2109	0.2512	0.263	0.2559	0.2464	0.263	0.282	0.2725	0.2583	0.2678	0.2607	0.2867	0.3033	0.2891	0.2725	0.282	0.2986	0.3199	0.3104	0.2749	0.2441	0.3009	0.3009	0.2891	0.3104	0.3223	0.3223	0.3081	0.3341	0.2062	0.2038	0.1635	0.1682	0.2536	0.4787
Fungi_Release38	fusarium_oxysporum_f_sp_melonis_26406	C	0.1754	0.1943	0.1967	0.2085	0.1635	0.1682	0.2251	0.1991	0.2583	0.2227	0.2488	0.2275	0.2701	0.2796	0.2701	0.263	0.2417	0.2488	0.1682	0.2156	0.237	0.2133	0.2133	0.1848	0.1635	0.1777	0.1967	0.2038	0.1754	0.2156	0.2062	0.2062	0.1896	0.1919	0.2512	0.2062	0.2275	0.2299	0.2156	0.2014	0.1327	0.1564	0.0806	0.0948	0.0545	0.0758	0.1019
Fungi_Release38	fusarium_oxysporum_f_sp_melonis_26406	G	0.2986	0.2559	0.2488	0.2891	0.2204	0.2536	0.2085	0.2393	0.173	0.2251	0.1777	0.2322	0.2133	0.1825	0.1706	0.2014	0.2014	0.2251	0.2654	0.2322	0.2275	0.2251	0.237	0.2441	0.2891	0.2583	0.3057	0.2393	0.2559	0.2346	0.1872	0.2156	0.2536	0.2038	0.1848	0.1777	0.1943	0.1943	0.2014	0.2393	0.3673	0.4882	0.5924	0.6161	0.654	0.4526	0.3294
Fungi_Release38	fusarium_oxysporum_f_sp_melonis_26406	T	0.2891	0.2915	0.3033	0.2701	0.372	0.2986	0.3412	0.3104	0.327	0.3436	0.2986	0.2891	0.3057	0.2867	0.2962	0.2796	0.3104	0.263	0.2844	0.2796	0.2773	0.2938	0.2891	0.2844	0.2441	0.2749	0.2251	0.2749	0.2701	0.2299	0.2962	0.3033	0.3128	0.3033	0.263	0.327	0.2678	0.2536	0.2607	0.2512	0.1659	0.1493	0.1232	0.1256	0.1232	0.218	0.09
Fungi_Release38	metarhizium_guizhouense_arsef_977	A	0.237	0.2441	0.2062	0.2227	0.2346	0.2299	0.2156	0.2464	0.218	0.2678	0.2796	0.237	0.2891	0.2488	0.3009	0.2393	0.2583	0.2464	0.2844	0.2346	0.2346	0.282	0.2583	0.2725	0.3128	0.2607	0.3081	0.2844	0.2654	0.2488	0.2796	0.2773	0.3033	0.2559	0.3057	0.2393	0.3294	0.3057	0.2986	0.218	0.2962	0.1754	0.1635	0.2133	0.2512	0.3104	0.4242
Fungi_Release38	metarhizium_guizhouense_arsef_977	C	0.2891	0.2346	0.282	0.2891	0.2915	0.3081	0.2536	0.2417	0.282	0.263	0.2251	0.2773	0.2346	0.2725	0.2346	0.2393	0.2299	0.263	0.218	0.2512	0.2536	0.2204	0.1872	0.2227	0.1943	0.2441	0.2156	0.218	0.2322	0.2559	0.1825	0.218	0.2322	0.2678	0.2133	0.2607	0.2109	0.2701	0.2322	0.2488	0.1493	0.1303	0.0948	0.109	0.1114	0.1445	0.1209
Fungi_Release38	metarhizium_guizhouense_arsef_977	G	0.2038	0.2204	0.2133	0.2133	0.2062	0.2133	0.2275	0.2488	0.2038	0.237	0.2014	0.2725	0.2156	0.2133	0.1967	0.2322	0.2654	0.2559	0.2346	0.2464	0.2725	0.2607	0.2488	0.2867	0.2796	0.2583	0.2393	0.2299	0.2109	0.2227	0.263	0.2275	0.237	0.2085	0.2085	0.2251	0.2038	0.2346	0.2204	0.327	0.4408	0.5806	0.6303	0.5735	0.5166	0.3839	0.3981
Fungi_Release38	metarhizium_guizhouense_arsef_977	T	0.2701	0.3009	0.2986	0.2749	0.2678	0.2488	0.3033	0.263	0.2962	0.2322	0.2938	0.2133	0.2607	0.2654	0.2678	0.2891	0.2464	0.2346	0.263	0.2678	0.2393	0.237	0.3057	0.218	0.2133	0.237	0.237	0.2678	0.2915	0.2725	0.2749	0.2773	0.2275	0.2678	0.2725	0.2749	0.2559	0.1896	0.2488	0.2062	0.1137	0.1137	0.1114	0.1043	0.1209	0.1611	0.0569
Fungi_Release38	phaeosphaeria_nodorum	A	0.2441	0.237	0.263	0.2559	0.218	0.2464	0.2299	0.2014	0.2299	0.2464	0.2725	0.2773	0.2488	0.2227	0.2204	0.263	0.2512	0.2725	0.2417	0.2725	0.2678	0.2251	0.2773	0.263	0.2299	0.3152	0.2559	0.2156	0.2796	0.263	0.2583	0.2701	0.2725	0.2915	0.2701	0.237	0.218	0.2773	0.3318	0.2891	0.282	0.1872	0.1991	0.1611	0.1706	0.2156	0.3957
Fungi_Release38	phaeosphaeria_nodorum	C	0.2441	0.2109	0.2227	0.2275	0.2322	0.2156	0.2441	0.2251	0.2559	0.2725	0.2417	0.2583	0.2725	0.2512	0.2725	0.2227	0.2559	0.218	0.2322	0.2227	0.1825	0.2204	0.2227	0.1919	0.237	0.2038	0.2014	0.1991	0.2346	0.2299	0.2393	0.2346	0.2085	0.2441	0.1611	0.2749	0.2251	0.1943	0.1611	0.1967	0.1137	0.1303	0.1161	0.1185	0.0758	0.1232	0.1019
Fungi_Release38	phaeosphaeria_nodorum	G	0.3009	0.3033	0.2654	0.2678	0.2867	0.2796	0.2607	0.3033	0.2607	0.2607	0.2844	0.2393	0.2796	0.2796	0.2915	0.2583	0.2678	0.2654	0.2938	0.2773	0.2678	0.3223	0.2559	0.282	0.3318	0.2678	0.3009	0.3246	0.2725	0.2986	0.2962	0.2796	0.263	0.237	0.2962	0.2962	0.2915	0.2701	0.3009	0.3175	0.4384	0.5569	0.5427	0.5782	0.6303	0.4905	0.4621
Fungi_Release38	phaeosphaeria_nodorum	T	0.2109	0.2488	0.2488	0.2488	0.263	0.2583	0.2654	0.2701	0.2536	0.2204	0.2014	0.2251	0.1991	0.2464	0.2156	0.2559	0.2251	0.2441	0.2322	0.2275	0.282	0.2322	0.2441	0.263	0.2014	0.2133	0.2417	0.2607	0.2133	0.2085	0.2062	0.2156	0.2559	0.2275	0.2725	0.1919	0.2654	0.2583	0.2062	0.1967	0.1659	0.1256	0.1422	0.1422	0.1232	0.1706	0.0403
Fungi_Release38	mortierella_elongata_ag_77	A	0.2827	0.2755	0.2613	0.3088	0.2969	0.2494	0.3017	0.2922	0.2779	0.2732	0.2565	0.266	0.3017	0.2494	0.2637	0.2684	0.2233	0.2209	0.247	0.1876	0.19	0.2019	0.1971	0.1758	0.2304	0.1805	0.2067	0.19	0.2162	0.1758	0.2138	0.1829	0.1829	0.2067	0.1781	0.1971	0.1829	0.1568	0.1544	0.1663	0.2043	0.1781	0.2542	0.2684	0.3539	0.4561	0.5962
Fungi_Release38	mortierella_elongata_ag_77	C	0.2185	0.2185	0.2162	0.2518	0.1876	0.2375	0.2067	0.1924	0.2352	0.228	0.1971	0.2375	0.209	0.247	0.2447	0.1734	0.2114	0.2185	0.2328	0.2185	0.2233	0.2423	0.2352	0.2209	0.2185	0.2209	0.2138	0.2423	0.2019	0.1829	0.1805	0.1734	0.2209	0.1758	0.2209	0.1781	0.1781	0.1378	0.133	0.1306	0.0594	0.0903	0.0784	0.1069	0.0974	0.0998	0.0523
Fungi_Release38	mortierella_elongata_ag_77	G	0.2185	0.1758	0.2447	0.1591	0.1924	0.2162	0.171	0.2019	0.1734	0.171	0.1995	0.1924	0.1354	0.1354	0.1544	0.171	0.1853	0.1758	0.1591	0.1639	0.1853	0.171	0.1568	0.2019	0.152	0.1686	0.1948	0.1924	0.171	0.2019	0.1829	0.1686	0.209	0.1853	0.1639	0.247	0.2518	0.3017	0.4228	0.4632	0.5819	0.5724	0.5487	0.4489	0.3967	0.2732	0.266
Fungi_Release38	mortierella_elongata_ag_77	T	0.2803	0.3302	0.2779	0.2803	0.323	0.2969	0.3207	0.3135	0.3135	0.3278	0.3468	0.304	0.3539	0.3682	0.3373	0.3872	0.38	0.3848	0.361	0.4299	0.4014	0.3848	0.4109	0.4014	0.399	0.4299	0.3848	0.3753	0.4109	0.4394	0.4228	0.4751	0.3872	0.4323	0.4371	0.3777	0.3872	0.4038	0.2898	0.2399	0.1544	0.1591	0.1188	0.1758	0.152	0.171	0.0855
Fungi_Release38	bipolaris_maydis_atcc_48331	A	0.269	0.2595	0.2357	0.2429	0.2286	0.2381	0.2429	0.2857	0.2929	0.269	0.2571	0.2476	0.2476	0.2571	0.3048	0.281	0.2738	0.2262	0.2595	0.2548	0.2405	0.2595	0.2976	0.2619	0.3167	0.2786	0.2857	0.2881	0.2857	0.3262	0.25	0.25	0.2952	0.2762	0.2667	0.2643	0.2833	0.3429	0.3238	0.231	0.25	0.2119	0.1833	0.1738	0.269	0.2786	0.4405
Fungi_Release38	bipolaris_maydis_atcc_48331	C	0.1929	0.1881	0.231	0.2357	0.2381	0.2524	0.2	0.2262	0.2071	0.2167	0.2333	0.2167	0.2095	0.2119	0.2571	0.219	0.1714	0.2095	0.181	0.169	0.1619	0.1976	0.1762	0.2119	0.1905	0.1833	0.2024	0.2095	0.2095	0.181	0.2333	0.1952	0.2071	0.2333	0.2381	0.2405	0.1929	0.1952	0.2119	0.231	0.1357	0.1143	0.0738	0.0857	0.0619	0.1238	0.0952
Fungi_Release38	bipolaris_maydis_atcc_48331	G	0.2595	0.2643	0.269	0.231	0.2738	0.2476	0.2524	0.2429	0.2333	0.2238	0.2214	0.2286	0.2929	0.2667	0.1905	0.25	0.2738	0.2667	0.2476	0.2619	0.2976	0.2714	0.2905	0.2881	0.2429	0.2762	0.2571	0.2905	0.2381	0.2524	0.2619	0.25	0.2405	0.2738	0.219	0.2262	0.2333	0.2333	0.2476	0.3024	0.4619	0.5619	0.6071	0.5905	0.5833	0.4071	0.4048
Fungi_Release38	bipolaris_maydis_atcc_48331	T	0.2786	0.2881	0.2643	0.2905	0.2595	0.2619	0.3048	0.2452	0.2667	0.2905	0.2881	0.3071	0.25	0.2643	0.2476	0.25	0.281	0.2976	0.3119	0.3143	0.3	0.2714	0.2357	0.2381	0.25	0.2619	0.2548	0.2119	0.2667	0.2405	0.2548	0.3048	0.2571	0.2167	0.2762	0.269	0.2905	0.2286	0.2167	0.2357	0.1524	0.1119	0.1357	0.15	0.0857	0.1905	0.0595
Fungi_Release38	fonsecaea_multimorphosa	A	0.2619	0.2333	0.2333	0.1929	0.1929	0.2214	0.2238	0.2095	0.231	0.2524	0.2405	0.2095	0.2595	0.231	0.2119	0.219	0.2548	0.269	0.2667	0.2714	0.2571	0.25	0.2286	0.2143	0.2714	0.2833	0.2262	0.2357	0.2619	0.2571	0.25	0.2548	0.2571	0.2262	0.2238	0.2381	0.3071	0.3333	0.3119	0.2167	0.2024	0.181	0.1905	0.2524	0.2381	0.3095	0.4452
Fungi_Release38	fonsecaea_multimorphosa	C	0.2238	0.2143	0.25	0.2238	0.2762	0.3048	0.2667	0.2905	0.25	0.231	0.2952	0.2833	0.2333	0.2476	0.2714	0.2619	0.2333	0.2476	0.2619	0.2167	0.2071	0.2167	0.2452	0.2667	0.2524	0.2381	0.2476	0.2167	0.2167	0.3024	0.2	0.2214	0.219	0.2405	0.2738	0.231	0.2095	0.2476	0.2286	0.2214	0.1357	0.1048	0.0857	0.0762	0.0833	0.1095	0.1452
Fungi_Release38	fonsecaea_multimorphosa	G	0.2405	0.2333	0.2452	0.2786	0.269	0.2143	0.2262	0.2214	0.2476	0.2262	0.1929	0.2452	0.2167	0.2214	0.231	0.2667	0.2476	0.2643	0.2238	0.281	0.2595	0.2952	0.2619	0.281	0.2119	0.2429	0.2905	0.2714	0.281	0.2143	0.2476	0.2167	0.2452	0.2071	0.1857	0.2048	0.2381	0.169	0.2357	0.3119	0.5095	0.5738	0.631	0.5429	0.5738	0.3833	0.3333
Fungi_Release38	fonsecaea_multimorphosa	T	0.2738	0.319	0.2714	0.3048	0.2619	0.2595	0.2833	0.2786	0.2714	0.2905	0.2714	0.2619	0.2905	0.3	0.2857	0.2524	0.2643	0.219	0.2476	0.231	0.2762	0.2381	0.2643	0.2381	0.2643	0.2357	0.2357	0.2762	0.2405	0.2262	0.3024	0.3071	0.2786	0.3262	0.3167	0.3262	0.2452	0.25	0.2238	0.25	0.1524	0.1405	0.0929	0.1286	0.1048	0.1976	0.0762
Fungi_Release38	fusarium_oxysporum_f_sp_pisi_hdv247	A	0.2488	0.2679	0.2488	0.2632	0.2464	0.2656	0.2344	0.2416	0.2129	0.2105	0.2823	0.2344	0.2464	0.2799	0.2512	0.2823	0.2584	0.2416	0.2895	0.244	0.2703	0.2775	0.2488	0.2584	0.3134	0.2871	0.299	0.3182	0.299	0.3158	0.3062	0.2943	0.2392	0.2943	0.2632	0.2512	0.2584	0.3445	0.3565	0.311	0.299	0.2105	0.201	0.1722	0.1986	0.2679	0.445
Fungi_Release38	fusarium_oxysporum_f_sp_pisi_hdv247	C	0.2081	0.1986	0.1746	0.201	0.1722	0.1866	0.2153	0.2225	0.2799	0.2321	0.2512	0.2464	0.2703	0.2727	0.3086	0.2392	0.2512	0.2488	0.2057	0.2225	0.2344	0.1962	0.1842	0.2249	0.1579	0.1675	0.1675	0.2033	0.1938	0.2177	0.2416	0.1675	0.2081	0.2129	0.2536	0.2656	0.2416	0.1914	0.2177	0.2249	0.1531	0.1579	0.0766	0.0813	0.0646	0.0813	0.1148
Fungi_Release38	fusarium_oxysporum_f_sp_pisi_hdv247	G	0.2751	0.2632	0.2679	0.2608	0.2201	0.2488	0.2033	0.2344	0.1794	0.189	0.1699	0.2273	0.1866	0.1699	0.1555	0.1818	0.1914	0.2225	0.2201	0.2464	0.2392	0.2368	0.2632	0.2392	0.2608	0.2632	0.3086	0.2464	0.256	0.2225	0.201	0.2344	0.244	0.1962	0.2201	0.1579	0.2081	0.1866	0.1914	0.2081	0.3756	0.4976	0.5981	0.6292	0.6196	0.4569	0.3565
Fungi_Release38	fusarium_oxysporum_f_sp_pisi_hdv247	T	0.2679	0.2703	0.3086	0.2751	0.3612	0.299	0.3469	0.3014	0.3278	0.3684	0.2967	0.2919	0.2967	0.2775	0.2847	0.2967	0.299	0.2871	0.2847	0.2871	0.256	0.2895	0.3038	0.2775	0.2679	0.2823	0.2249	0.2321	0.2512	0.244	0.2512	0.3038	0.3086	0.2967	0.2632	0.3254	0.2919	0.2775	0.2344	0.256	0.1722	0.134	0.1244	0.1172	0.1172	0.1938	0.0837
Fungi_Release38	histoplasma_capsulatum_g186ar	A	0.2584	0.256	0.2727	0.2416	0.2656	0.2416	0.256	0.2464	0.2632	0.2584	0.2105	0.2775	0.2656	0.2775	0.2967	0.2943	0.2584	0.2847	0.2919	0.299	0.2727	0.2656	0.2919	0.2799	0.2775	0.2967	0.2871	0.2823	0.299	0.299	0.256	0.2967	0.2727	0.3182	0.2584	0.2392	0.2847	0.2368	0.2225	0.1555	0.2153	0.1986	0.2344	0.2847	0.3541	0.2727	0.4737
Fungi_Release38	histoplasma_capsulatum_g186ar	C	0.2727	0.244	0.2344	0.2392	0.2057	0.2249	0.2177	0.2464	0.2129	0.1986	0.2488	0.2321	0.2297	0.2225	0.2177	0.2177	0.2177	0.2105	0.2464	0.2273	0.2081	0.2249	0.201	0.1746	0.2081	0.2321	0.2105	0.2105	0.1746	0.177	0.2225	0.2368	0.2273	0.2105	0.2153	0.1842	0.1675	0.2273	0.1938	0.1579	0.1005	0.0694	0.067	0.0789	0.0909	0.1005	0.0933
Fungi_Release38	histoplasma_capsulatum_g186ar	G	0.2321	0.1866	0.2177	0.2105	0.2057	0.2368	0.2129	0.2273	0.1914	0.2273	0.2129	0.2153	0.2297	0.2057	0.1866	0.1842	0.2033	0.2297	0.1699	0.1962	0.201	0.201	0.201	0.1842	0.1914	0.1507	0.1962	0.1722	0.2153	0.1986	0.2033	0.1962	0.1914	0.1938	0.1818	0.2488	0.2536	0.2464	0.2943	0.39	0.5383	0.6077	0.555	0.4569	0.4163	0.3445	0.3421
Fungi_Release38	histoplasma_capsulatum_g186ar	T	0.2368	0.3134	0.2751	0.3086	0.323	0.2967	0.3134	0.2799	0.3325	0.3158	0.3278	0.2751	0.2751	0.2943	0.299	0.3038	0.3206	0.2751	0.2919	0.2775	0.3182	0.3086	0.3062	0.3612	0.323	0.3206	0.3062	0.3349	0.311	0.3254	0.3182	0.2703	0.3086	0.2775	0.3445	0.3278	0.2943	0.2895	0.2895	0.2967	0.1459	0.1244	0.1435	0.1794	0.1388	0.2823	0.0909
Fungi_Release38	aspergillus_udagawae	A	0.1894	0.2062	0.2206	0.2398	0.1751	0.2278	0.2062	0.2158	0.2062	0.199	0.2254	0.2254	0.2326	0.2206	0.2422	0.2422	0.2542	0.2518	0.247	0.2638	0.2902	0.2446	0.235	0.259	0.259	0.2614	0.2614	0.271	0.2878	0.2398	0.2902	0.2518	0.2398	0.259	0.2518	0.247	0.2926	0.283	0.2326	0.1847	0.2662	0.2134	0.1535	0.1894	0.2062	0.2686	0.4628
Fungi_Release38	aspergillus_udagawae	C	0.2182	0.2398	0.2422	0.271	0.235	0.2062	0.2758	0.271	0.2542	0.2614	0.2398	0.2278	0.2254	0.2446	0.2206	0.2758	0.211	0.259	0.235	0.2422	0.2086	0.247	0.2062	0.2302	0.2014	0.2086	0.2374	0.211	0.1655	0.2446	0.1918	0.1942	0.271	0.2206	0.2134	0.1799	0.2326	0.2446	0.2518	0.1535	0.1199	0.1295	0.1439	0.1055	0.0767	0.0911	0.0935
Fungi_Release38	aspergillus_udagawae	G	0.247	0.2326	0.2062	0.1942	0.2446	0.2398	0.2398	0.2038	0.2134	0.235	0.2206	0.2086	0.2038	0.247	0.199	0.2182	0.2158	0.211	0.2494	0.2374	0.2206	0.2302	0.2662	0.2302	0.2374	0.259	0.2422	0.2494	0.2758	0.2878	0.259	0.2422	0.247	0.2254	0.2446	0.2398	0.1799	0.2302	0.199	0.3237	0.4892	0.4964	0.5947	0.5851	0.5971	0.4508	0.3573
[truncated: 3,057 more rows]
[truncated: 7 more columns]
